# Supplementary material for: Genome-Wide Analyses for Osteosarcoma in Leonberger Dogs Reveal the CDKN2A/B Gene Locus as a Major Risk Locus
Source: MDPI journal article supplement (doi:10.3390/genes12121964), 2021-12-09
Supplement: s1 [file s1]

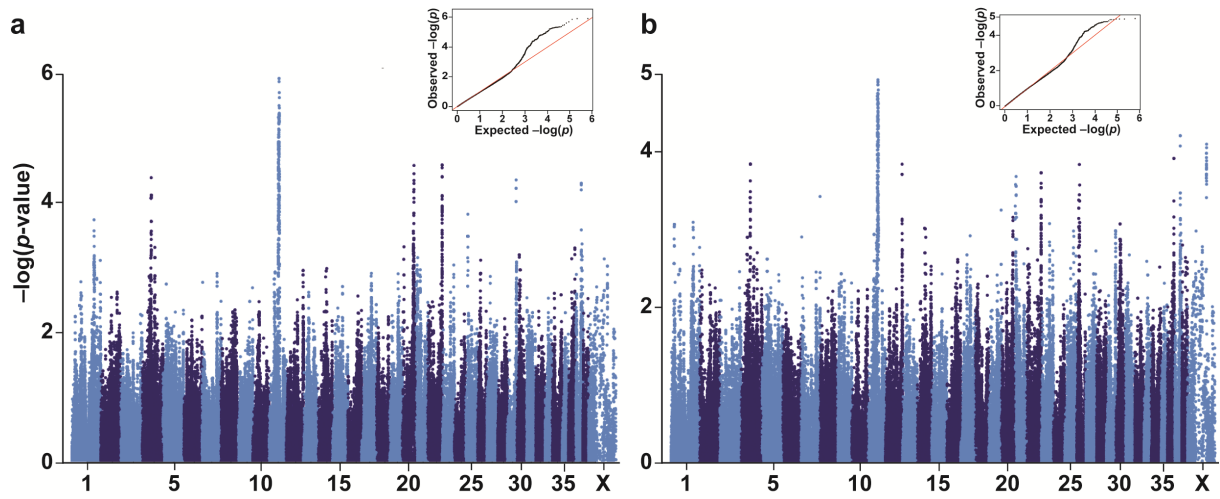

**Figure S1:** Manhattan plots of the GWAS results for OSA using either (a) all controls ( $n = 365$ ) and younger cases (7 years or less,  $n = 77$ ) or (b) older controls (10 years or more,  $n = 184$ ) and younger cases (7 years or less,  $n = 77$ ).
