# Supplementary material for: Genome-Wide Analyses for Osteosarcoma in Leonberger Dogs Reveal the CDKN2A/B Gene Locus as a Major Risk Locus
Source: Genes (Basel). 2021 Dec 9;12(12):1964. doi: 10.3390/genes12121964 (PMC8700858; doi:10.3390/genes12121964)
Supplement: Supplementary file 1 [file genes-12-01964-s001.zip › TableS1.xlsx]

## Sheet: Table S1a
Supplementary Table S1a. The 10,000 most significant markers sorted by P value obtained from the genome-wide association study in 273 OSA-affected and 365 unaffected Leonbergers.
Chromosome	SNP ID	Position	Minor allele	Major allele	Allele frequency	Beta estimates	Standard errors for beta	Restricted maximum likelihood estimates for lambda	P value of score test
11	11:39434964	39434964	G	A	0.46	-0.166341	0.0288166	0.304655	5.95686e-08
11	11:39569914	39569914	C	T	0.466	-0.164207	0.0289624	0.313421	9.28172e-08
11	11:39855024	39855024	A	G	0.467	-0.162683	0.029189	0.324235	1.37711e-07
11	11:39732327	39732327	C	T	0.467	-0.161591	0.0291051	0.324016	1.53782e-07
11	11:42101398	42101398	G	A	0.416	-0.16018	0.0292145	0.377385	1.5457e-07
11	11:41589812	41589812	G	A	0.445	-0.161627	0.0287833	0.276845	1.77151e-07
11	11:39607431	39607431	T	G	0.466	-0.159442	0.029069	0.322605	2.17598e-07
11	11:39902892	39902892	C	T	0.435	-0.160991	0.029008	0.277693	2.41589e-07
11	11:42676919	42676919	A	C	0.418	-0.157734	0.0292077	0.369899	2.42339e-07
11	11:42182650	42182650	A	G	0.404	-0.159073	0.0296403	0.36928	2.87117e-07
11	11:39851658	39851658	A	T	0.449	-0.158427	0.0297211	0.402195	2.90006e-07
11	11:39854465	39854465	C	A	0.449	-0.158427	0.0297211	0.402195	2.90006e-07
11	11:40005289	40005289	A	G	0.432	-0.160334	0.0291773	0.281903	3.04525e-07
11	11:41230601	41230601	A	G	0.44	-0.157427	0.029581	0.398366	3.08018e-07
11	11:40808098	40808098	G	A	0.448	-0.159305	0.0287783	0.258881	3.2559e-07
11	11:40823710	40823710	C	T	0.448	-0.159305	0.0287783	0.258881	3.2559e-07
11	11:40825748	40825748	G	T	0.448	-0.159305	0.0287783	0.258881	3.2559e-07
11	11:40963324	40963324	A	G	0.477	-0.15785	0.0289898	0.29431	3.44278e-07
11	11:40964679	40964679	T	C	0.477	-0.15785	0.0289898	0.29431	3.44278e-07
11	11:42669763	42669763	A	G	0.416	-0.155382	0.0291503	0.367696	3.4552e-07
11	11:42676131	42676131	G	A	0.416	-0.155382	0.0291503	0.367696	3.4552e-07
11	11:41525068	41525068	C	A	0.443	-0.157944	0.0288922	0.282324	3.51422e-07
11	11:42444902	42444902	T	C	0.393	-0.156109	0.0293655	0.366316	3.74377e-07
11	11:40946096	40946096	T	C	0.475	-0.157478	0.0290367	0.295817	3.77354e-07
11	11:39729050	39729050	G	A	0.448	-0.156338	0.0296892	0.401989	3.97027e-07
11	11:42179479	42179479	C	A	0.405	-0.157012	0.0296797	0.364949	4.28136e-07
11	11:42088118	42088118	T	A	0.403	-0.15708	0.0297629	0.365976	4.51859e-07
11	11:41003808	41003808	A	G	0.479	-0.155946	0.0288903	0.290407	4.5256e-07
11	11:39707108	39707108	T	C	0.447	-0.155263	0.0297578	0.400072	5.04908e-07
11	11:42487642	42487642	G	A	0.422	-0.155344	0.0287595	0.271983	5.48154e-07
11	11:42374433	42374433	T	C	0.393	-0.153671	0.029339	0.365043	5.49555e-07
11	11:41583157	41583157	C	T	0.387	-0.157207	0.0300162	0.365497	5.50269e-07
11	11:41586896	41586896	C	A	0.387	-0.157207	0.0300162	0.365497	5.50269e-07
11	11:41601470	41601470	T	C	0.432	-0.158102	0.029254	0.269909	5.55338e-07
11	11:42641047	42641047	C	A	0.411	-0.15401	0.0294347	0.353146	6.12184e-07
11	11:40845978	40845978	G	A	0.426	-0.157132	0.0289701	0.250758	6.33602e-07
11	11:39963631	39963631	A	G	0.413	-0.154868	0.029885	0.36337	7.229e-07
11	11:41015539	41015539	G	A	0.455	-0.153695	0.0290287	0.286706	7.82459e-07
11	11:42434938	42434938	T	C	0.389	-0.152689	0.0296309	0.367162	8.15231e-07
11	11:42439975	42439975	T	C	0.389	-0.152689	0.0296309	0.367162	8.15231e-07
11	11:40851998	40851998	G	A	0.413	-0.153177	0.0297061	0.357353	8.49944e-07
11	11:40871956	40871956	C	T	0.413	-0.153177	0.0297061	0.357353	8.49944e-07
11	11:40968576	40968576	T	G	0.453	-0.153408	0.0290838	0.287987	8.49955e-07
11	11:40975633	40975633	C	G	0.453	-0.153408	0.0290838	0.287987	8.49955e-07
11	11:41525037	41525037	T	C	0.398	-0.154687	0.0301249	0.36532	9.0041e-07
11	11:40876927	40876927	G	A	0.412	-0.151626	0.0297079	0.358799	1.0826e-06
11	11:40880071	40880071	A	G	0.412	-0.151626	0.0297079	0.358799	1.0826e-06
11	11:40883794	40883794	T	C	0.412	-0.151626	0.0297079	0.358799	1.0826e-06
11	11:40910664	40910664	A	C	0.412	-0.151626	0.0297079	0.358799	1.0826e-06
11	11:42641025	42641025	T	C	0.404	-0.150298	0.0296099	0.357528	1.24885e-06
11	11:40864349	40864349	G	T	0.414	-0.150156	0.0296364	0.35703	1.30264e-06
11	11:40190451	40190451	A	G	0.396	-0.15273	0.0299774	0.336287	1.32721e-06
11	11:40801214	40801214	T	C	0.391	-0.152536	0.0301105	0.347371	1.39833e-06
11	11:40803314	40803314	C	T	0.391	-0.152536	0.0301105	0.347371	1.39833e-06
11	11:40873067	40873067	T	C	0.413	-0.150569	0.0298183	0.358588	1.39844e-06
11	11:42674118	42674118	A	G	0.417	-0.151832	0.0291643	0.265981	1.54064e-06
11	11:42752848	42752848	A	G	0.416	-0.151006	0.0288834	0.256644	1.57009e-06
11	11:43064189	43064189	A	G	0.414	-0.145223	0.0290363	0.364102	1.70015e-06
11	11:41040973	41040973	A	G	0.445	-0.151697	0.0294228	0.277283	1.70796e-06
11	11:42391383	42391383	A	G	0.387	-0.147013	0.0294838	0.363915	1.81769e-06
11	11:42883749	42883749	T	A	0.383	-0.148652	0.029718	0.344911	1.93608e-06
11	11:39884429	39884429	A	G	0.47	0.147211	0.0295947	0.35239	2.06948e-06
11	11:39506978	39506978	A	G	0.473	0.146791	0.0294967	0.34761	2.11862e-06
11	11:39511761	39511761	T	C	0.473	0.146791	0.0294967	0.34761	2.11862e-06
11	11:39514019	39514019	G	T	0.473	0.146791	0.0294967	0.34761	2.11862e-06
11	11:39515290	39515290	C	T	0.473	0.146791	0.0294967	0.34761	2.11862e-06
11	11:39520134	39520134	G	C	0.477	0.147399	0.0295771	0.341587	2.13747e-06
11	11:39868191	39868191	C	T	0.469	0.145664	0.0296779	0.350509	2.84706e-06
11	11:42845119	42845119	A	G	0.391	-0.142108	0.0293029	0.360018	3.52443e-06
11	11:42361995	42361995	A	G	0.375	-0.145882	0.0301239	0.357554	3.67206e-06
11	11:39876280	39876280	G	C	0.47	0.143479	0.0296344	0.351263	3.84116e-06
11	11:42094447	42094447	C	A	0.476	-0.140162	0.029321	0.397396	3.93468e-06
11	11:41080449	41080449	G	A	0.38	-0.14803	0.0305196	0.34056	4.00836e-06
11	11:39996002	39996002	C	T	0.476	0.14304	0.0297528	0.348198	4.57983e-06
11	11:42802865	42802865	A	T	0.392	-0.14027	0.0293523	0.359643	4.87217e-06
11	11:42823733	42823733	A	G	0.392	-0.14027	0.0293523	0.359643	4.87217e-06
11	11:42830592	42830592	T	A	0.392	-0.14027	0.0293523	0.359643	4.87217e-06
11	11:42834387	42834387	C	T	0.392	-0.14027	0.0293523	0.359643	4.87217e-06
11	11:42834505	42834505	G	A	0.392	-0.14027	0.0293523	0.359643	4.87217e-06
11	11:42850705	42850705	T	C	0.392	-0.14027	0.0293523	0.359643	4.87217e-06
11	11:42853780	42853780	G	T	0.392	-0.14027	0.0293523	0.359643	4.87217e-06
11	11:42863441	42863441	A	G	0.392	-0.14027	0.0293523	0.359643	4.87217e-06
11	11:42873216	42873216	T	C	0.392	-0.14027	0.0293523	0.359643	4.87217e-06
11	11:42878412	42878412	C	T	0.392	-0.14027	0.0293523	0.359643	4.87217e-06
11	11:42879665	42879665	C	T	0.392	-0.14027	0.0293523	0.359643	4.87217e-06
11	11:43192147	43192147	G	T	0.395	-0.138995	0.0292279	0.375284	4.91384e-06
11	11:41660654	41660654	G	A	0.504	-0.140574	0.029047	0.311366	5.35028e-06
11	11:41673196	41673196	T	C	0.504	-0.140574	0.029047	0.311366	5.35028e-06
11	11:41776731	41776731	A	T	0.504	-0.140574	0.029047	0.311366	5.35028e-06
11	11:41850796	41850796	T	C	0.504	-0.140574	0.029047	0.311366	5.35028e-06
11	11:43198757	43198757	A	G	0.399	-0.137201	0.0290222	0.367523	5.83932e-06
11	11:41050406	41050406	T	C	0.381	-0.145787	0.030553	0.337035	5.89329e-06
11	11:41060341	41060341	A	G	0.381	-0.145787	0.030553	0.337035	5.89329e-06
11	11:41067470	41067470	A	T	0.381	-0.145787	0.030553	0.337035	5.89329e-06
11	11:41078090	41078090	G	A	0.381	-0.145787	0.030553	0.337035	5.89329e-06
11	11:40919691	40919691	T	C	0.463	0.141476	0.0295619	0.327652	5.91538e-06
11	11:40920608	40920608	G	T	0.463	0.141476	0.0295619	0.327652	5.91538e-06
11	11:40924188	40924188	G	C	0.463	0.141476	0.0295619	0.327652	5.91538e-06
11	11:40940614	40940614	G	A	0.463	0.141476	0.0295619	0.327652	5.91538e-06
11	11:40953268	40953268	C	T	0.463	0.141476	0.0295619	0.327652	5.91538e-06
11	11:41011254	41011254	T	C	0.463	0.141476	0.0295619	0.327652	5.91538e-06
11	11:41057665	41057665	C	G	0.463	0.141476	0.0295619	0.327652	5.91538e-06
11	11:41069717	41069717	T	C	0.463	0.141476	0.0295619	0.327652	5.91538e-06
11	11:40112529	40112529	C	A	0.523	-0.140878	0.0297118	0.349133	6.13086e-06
11	11:39459625	39459625	A	G	0.505	-0.14019	0.0293024	0.324891	6.13562e-06
11	11:39473179	39473179	G	T	0.505	-0.14019	0.0293024	0.324891	6.13562e-06
11	11:42389352	42389352	T	C	0.375	-0.142295	0.0300624	0.351051	6.29564e-06
11	11:39856542	39856542	T	C	0.51	-0.140181	0.0301551	0.420759	6.44084e-06
11	11:40447455	40447455	C	T	0.522	-0.140203	0.029808	0.341107	7.71915e-06
11	11:39807121	39807121	G	T	0.494	-0.137699	0.0291242	0.31854	8.25295e-06
11	11:40205082	40205082	G	A	0.491	-0.137643	0.0293415	0.311476	1.04409e-05
11	11:43501947	43501947	G	A	0.428	0.133061	0.0285363	0.320977	1.0635e-05
11	11:41137201	41137201	C	T	0.522	-0.138177	0.0296896	0.325141	1.09664e-05
11	11:41144469	41144469	A	G	0.522	-0.138177	0.0296896	0.325141	1.09664e-05
11	11:41641512	41641512	A	C	0.48	-0.136022	0.0291257	0.303773	1.23646e-05
11	11:43275596	43275596	A	C	0.333	-0.135299	0.0303475	0.407642	1.54681e-05
11	11:43742625	43742625	T	A	0.326	-0.138679	0.0308497	0.374515	1.55978e-05
11	11:41611530	41611530	T	C	0.493	-0.135248	0.0293429	0.307661	1.56512e-05
11	11:40971401	40971401	T	G	0.513	-0.134745	0.0294395	0.320728	1.59131e-05
11	11:40982872	40982872	A	G	0.513	-0.134745	0.0294395	0.320728	1.59131e-05
11	11:41134483	41134483	A	G	0.473	0.136611	0.0299399	0.324062	1.65277e-05
11	11:43614040	43614040	A	G	0.437	-0.13158	0.0285775	0.299457	1.72949e-05
11	11:39667750	39667750	C	G	0.491	-0.13182	0.0299445	0.403247	2.00488e-05
11	11:43699859	43699859	C	T	0.367	-0.130854	0.0298685	0.420302	2.05167e-05
20	20:5855691	5855691	T	C	0.148	0.173323	0.038829	0.337606	2.22498e-05
11	11:41148019	41148019	A	G	0.49	-0.132266	0.0302616	0.402977	2.29505e-05
11	11:43569687	43569687	A	G	0.351	-0.131133	0.0302108	0.416079	2.46433e-05
11	11:39613780	39613780	G	A	0.491	-0.130505	0.0299951	0.401589	2.50796e-05
11	11:39286625	39286625	G	A	0.417	-0.131445	0.0301381	0.386035	2.56133e-05
18	18:50030091	50030091	A	G	0.451	-0.125208	0.0292669	0.562059	2.91781e-05
11	11:38657464	38657464	T	C	0.401	-0.129555	0.0298302	0.375332	2.9325e-05
18	18:50010505	50010505	G	A	0.453	-0.124741	0.0293346	0.554317	3.20015e-05
18	18:50027227	50027227	T	C	0.453	-0.124741	0.0293346	0.554317	3.20015e-05
11	11:43479473	43479473	G	A	0.437	0.126132	0.0285394	0.311908	3.33417e-05
11	11:43598990	43598990	A	G	0.364	0.131202	0.0301373	0.345131	3.39789e-05
11	11:43553619	43553619	T	C	0.439	0.12626	0.0286312	0.314237	3.40563e-05
18	18:50030527	50030527	C	A	0.453	-0.123794	0.0292172	0.556862	3.42433e-05
11	11:43280364	43280364	T	C	0.33	-0.129703	0.0304862	0.406923	3.65732e-05
11	11:42238647	42238647	C	T	0.373	0.128995	0.029862	0.351921	3.71145e-05
11	11:42261240	42261240	C	A	0.373	0.128995	0.029862	0.351921	3.71145e-05
11	11:43323141	43323141	C	T	0.335	-0.128552	0.0301951	0.400629	3.71383e-05
11	11:40523071	40523071	A	C	0.48	-0.128104	0.030111	0.39924	3.7873e-05
11	11:38431249	38431249	C	T	0.357	-0.131719	0.0302921	0.333309	3.79899e-05
11	11:38433473	38433473	A	G	0.357	-0.131719	0.0302921	0.333309	3.79899e-05
11	11:43311824	43311824	C	T	0.334	-0.127825	0.0302903	0.401286	4.32159e-05
11	11:43316247	43316247	A	G	0.334	-0.127825	0.0302903	0.401286	4.32159e-05
11	11:43483348	43483348	A	G	0.44	0.124263	0.0285955	0.316473	4.38636e-05
11	11:42213042	42213042	C	T	0.374	0.12782	0.0299215	0.355448	4.42387e-05
18	18:50050735	50050735	C	T	0.452	-0.121546	0.0291674	0.552782	4.52402e-05
18	18:50058686	50058686	T	C	0.452	-0.121546	0.0291674	0.552782	4.52402e-05
11	11:43742727	43742727	A	G	0.342	-0.126851	0.0302842	0.415486	4.64367e-05
11	11:43290639	43290639	A	G	0.332	-0.127307	0.0303262	0.40286	4.69838e-05
11	11:41137924	41137924	T	C	0.468	-0.12718	0.0302708	0.395979	4.79589e-05
18	18:50047622	50047622	G	A	0.454	-0.12106	0.0292321	0.545227	4.96502e-05
18	18:50049300	50049300	G	A	0.454	-0.12106	0.0292321	0.545227	4.96502e-05
11	11:41548536	41548536	T	C	0.398	-0.127481	0.0300595	0.357496	4.99745e-05
11	11:41475242	41475242	T	G	0.482	0.122098	0.0282328	0.305552	5.25321e-05
18	18:50044272	50044272	T	A	0.451	-0.120104	0.0291342	0.555694	5.45034e-05
33	33:31038879	31038879	A	G	0.284	-0.129604	0.0313666	0.428285	5.5337e-05
11	11:43064938	43064938	T	C	0.368	0.127521	0.0302183	0.348014	5.79751e-05
33	33:31056919	31056919	A	C	0.288	-0.127985	0.0310146	0.411749	5.97551e-05
11	11:43679160	43679160	T	G	0.342	-0.124626	0.030306	0.41439	6.35807e-05
11	11:43705610	43705610	G	A	0.342	-0.124626	0.030306	0.41439	6.35807e-05
33	33:31005562	31005562	A	G	0.279	-0.127395	0.031317	0.430261	7.11878e-05
11	11:42198523	42198523	G	A	0.406	0.121518	0.0298856	0.428883	7.24958e-05
11	11:39299911	39299911	C	T	0.406	-0.125213	0.0304164	0.377187	7.38535e-05
33	33:31045672	31045672	G	C	0.303	-0.12079	0.0299961	0.422494	8.58231e-05
33	33:31029796	31029796	T	C	0.277	-0.126499	0.0315915	0.43708	8.99983e-05
11	11:38956978	38956978	T	C	0.377	-0.122989	0.0306974	0.433971	9.07213e-05
11	11:38649531	38649531	A	G	0.382	-0.121858	0.0304618	0.442038	9.09008e-05
11	11:39260557	39260557	T	C	0.405	-0.123249	0.0303698	0.377851	9.30607e-05
11	11:38435917	38435917	T	C	0.34	-0.123151	0.0309058	0.403434	0.000110179
11	11:38460376	38460376	T	C	0.34	-0.123151	0.0309058	0.403434	0.000110179
11	11:38481486	38481486	T	C	0.34	-0.123151	0.0309058	0.403434	0.000110179
11	11:38464982	38464982	G	A	0.338	-0.123448	0.0310475	0.404961	0.000113213
11	11:38493332	38493332	A	G	0.338	-0.123448	0.0310475	0.404961	0.000113213
5	5:68065766	68065766	T	G	0.085	-0.201341	0.0503355	0.382703	0.00011334
11	11:39994316	39994316	T	C	0.378	-0.124641	0.0308252	0.354664	0.000113903
11	11:42952952	42952952	T	C	0.367	0.12155	0.0300965	0.354575	0.00011559
11	11:40777312	40777312	C	T	0.419	-0.122819	0.0306353	0.368504	0.000119355
11	11:40782127	40782127	A	G	0.419	-0.122819	0.0306353	0.368504	0.000119355
11	11:40784980	40784980	A	G	0.419	-0.122819	0.0306353	0.368504	0.000119355
4	4:37748075	37748075	T	C	0.235	0.138571	0.0352346	0.43522	0.000119784
11	11:41447098	41447098	C	T	0.344	-0.123921	0.0314585	0.426762	0.000120677
11	11:40367664	40367664	C	T	0.409	-0.122763	0.0307682	0.37107	0.000127028
11	11:40370670	40370670	C	T	0.409	-0.122763	0.0307682	0.37107	0.000127028
18	18:20656824	20656824	T	G	0.118	-0.175278	0.0446129	0.412177	0.000132198
11	11:43593717	43593717	T	C	0.332	-0.119786	0.0305595	0.413645	0.000136412
11	11:43437859	43437859	T	C	0.463	0.115475	0.0284424	0.317284	0.000141021
11	11:43455777	43455777	C	G	0.463	0.115475	0.0284424	0.317284	0.000141021
4	4:37552673	37552673	T	C	0.23	0.136771	0.0352243	0.433724	0.000146014
11	11:41561713	41561713	T	C	0.355	-0.120863	0.031059	0.424268	0.000146458
11	11:38442584	38442584	T	C	0.356	-0.11818	0.0304061	0.410071	0.000156875
11	11:38468951	38468951	A	C	0.356	-0.11818	0.0304061	0.410071	0.000156875
11	11:40352759	40352759	C	T	0.408	-0.120757	0.0307451	0.372297	0.000160979
11	11:43721145	43721145	G	A	0.379	0.119288	0.0300532	0.342666	0.000166132
20	20:6753853	6753853	T	C	0.121	0.166001	0.0423442	0.368143	0.000167684
5	5:52271622	52271622	C	T	0.12	0.171219	0.0446304	0.447913	0.000168479
5	5:52294531	52294531	T	C	0.12	0.171219	0.0446304	0.447913	0.000168479
11	11:41532663	41532663	T	C	0.354	-0.120021	0.0311568	0.424892	0.000170007
11	11:41562929	41562929	C	A	0.354	-0.120021	0.0311568	0.424892	0.000170007
11	11:43172809	43172809	G	A	0.377	0.119531	0.0301983	0.343295	0.000172743
11	11:38954904	38954904	T	C	0.339	-0.120311	0.0311396	0.408146	0.000173316
20	20:7903596	7903596	G	A	0.128	0.163614	0.0417102	0.355199	0.000180321
11	11:42444688	42444688	G	T	0.397	0.116716	0.0297159	0.35292	0.000180492
11	11:41265486	41265486	C	T	0.332	-0.121918	0.0317593	0.419829	0.000182185
11	11:38646033	38646033	T	C	0.339	-0.118939	0.0308586	0.399202	0.000186497
4	4:37754737	37754737	G	T	0.228	0.136926	0.0357997	0.421778	0.000189143
11	11:42885819	42885819	A	G	0.401	0.114355	0.0300151	0.42685	0.000198158
18	18:21009602	21009602	C	T	0.118	-0.170399	0.0446211	0.414956	0.000199827
11	11:40074310	40074310	A	G	0.36	-0.121805	0.0310652	0.344056	0.000200059
11	11:39655214	39655214	T	C	0.375	-0.118781	0.0305495	0.357505	0.000205441
11	11:39787609	39787609	C	T	0.36	-0.119313	0.03135	0.4191	0.000206956
11	11:39794319	39794319	G	A	0.36	-0.119313	0.03135	0.4191	0.000206956
11	11:39801198	39801198	A	G	0.36	-0.119313	0.03135	0.4191	0.000206956
11	11:38596931	38596931	A	G	0.34	-0.117806	0.0308225	0.398889	0.000211309
11	11:39244915	39244915	T	C	0.366	-0.118344	0.031252	0.42635	0.000217246
11	11:38583824	38583824	A	G	0.338	-0.118044	0.0309621	0.40037	0.00021763
11	11:42435634	42435634	G	A	0.397	0.115276	0.029724	0.353577	0.000217884
11	11:42480533	42480533	A	G	0.397	0.115276	0.029724	0.353577	0.000217884
11	11:41547206	41547206	A	G	0.351	-0.118266	0.0312723	0.426694	0.00022091
20	20:7883657	7883657	T	C	0.11	0.171039	0.0444695	0.367928	0.000222955
20	20:7889579	7889579	G	A	0.11	0.171039	0.0444695	0.367928	0.000222955
20	20:6963501	6963501	A	G	0.11	0.169306	0.044214	0.37818	0.000224031
20	20:7074757	7074757	T	C	0.11	0.169306	0.044214	0.37818	0.000224031
11	11:38423215	38423215	C	T	0.474	-0.112277	0.0296381	0.413102	0.000225973
5	5:52894271	52894271	G	A	0.308	0.129692	0.0343548	0.424635	0.00022723
5	5:52905794	52905794	T	C	0.308	0.129692	0.0343548	0.424635	0.00022723
11	11:39925315	39925315	A	T	0.359	-0.119174	0.0315222	0.416769	0.000229744
11	11:39926574	39926574	A	G	0.359	-0.119174	0.0315222	0.416769	0.000229744
11	11:41314753	41314753	C	T	0.328	-0.120386	0.0319111	0.422424	0.000232182
11	11:38623732	38623732	C	A	0.339	-0.117079	0.0308804	0.401673	0.000234515
39	39:87414946	87414946	C	T	0.425	0.091422	0.0244175	0.550313	0.000235552
11	11:39924801	39924801	C	T	0.361	-0.118857	0.0315585	0.414766	0.000244481
18	18:49920438	49920438	C	T	0.483	0.10907	0.0290818	0.58722	0.000249828
11	11:41274170	41274170	A	C	0.332	-0.119484	0.0318026	0.417326	0.00025078
18	18:20874197	20874197	G	A	0.121	-0.166264	0.0442825	0.418594	0.00025135
11	11:42888192	42888192	T	A	0.402	0.112197	0.0299528	0.427352	0.000252069
11	11:42429463	42429463	A	G	0.389	0.114314	0.0297659	0.352237	0.000254722
11	11:41298731	41298731	A	G	0.33	-0.119756	0.0319528	0.418647	0.000258257
11	11:41350277	41350277	G	C	0.33	-0.119756	0.0319528	0.418647	0.000258257
11	11:41354086	41354086	T	C	0.33	-0.119756	0.0319528	0.418647	0.000258257
11	11:41375800	41375800	C	A	0.33	-0.119756	0.0319528	0.418647	0.000258257
11	11:41393054	41393054	C	T	0.33	-0.119756	0.0319528	0.418647	0.000258257
18	18:21004637	21004637	T	A	0.12	-0.165424	0.0441127	0.415652	0.000258554
18	18:21004699	21004699	C	T	0.12	-0.165424	0.0441127	0.415652	0.000258554
11	11:39446034	39446034	T	C	0.371	-0.117204	0.031271	0.418121	0.000258816
11	11:39448409	39448409	G	T	0.371	-0.117204	0.031271	0.418121	0.000258816
11	11:39469053	39469053	C	T	0.371	-0.117204	0.031271	0.418121	0.000258816
11	11:39362267	39362267	T	C	0.353	-0.118883	0.0307654	0.338401	0.000260354
11	11:39429247	39429247	A	G	0.369	-0.116989	0.0312938	0.423355	0.000263333
11	11:39432838	39432838	A	G	0.369	-0.116989	0.0312938	0.423355	0.000263333
11	11:40758853	40758853	A	G	0.357	-0.11813	0.031547	0.416262	0.000263618
11	11:40776377	40776377	C	T	0.357	-0.11813	0.031547	0.416262	0.000263618
11	11:39865458	39865458	A	G	0.34	0.117421	0.031535	0.43857	0.000265449
11	11:38769229	38769229	T	C	0.341	-0.115752	0.030822	0.399463	0.00027128
5	5:51418288	51418288	C	A	0.107	0.173348	0.0466146	0.426103	0.000278344
39	39:87344737	87344737	A	G	0.419	0.0903551	0.0244756	0.530518	0.000278908
39	39:87359743	87359743	A	G	0.419	0.0903551	0.0244756	0.530518	0.000278908
11	11:44442303	44442303	G	C	0.3	0.121675	0.0329193	0.456235	0.000282208
11	11:44449058	44449058	G	A	0.3	0.121675	0.0329193	0.456235	0.000282208
11	11:41570647	41570647	T	C	0.362	-0.117454	0.0308506	0.349884	0.000296446
5	5:52901262	52901262	T	G	0.309	0.126501	0.0342185	0.424617	0.00030463
11	11:41252822	41252822	T	C	0.349	-0.115854	0.0313145	0.415639	0.000312455
5	5:53047433	53047433	G	T	0.317	0.124792	0.033846	0.423101	0.000317892
5	5:53049832	53049832	G	A	0.317	0.124792	0.033846	0.423101	0.000317892
11	11:40787722	40787722	T	G	0.338	-0.118006	0.0318726	0.405869	0.00032217
11	11:38677996	38677996	C	A	0.357	-0.112056	0.0303551	0.414636	0.000322927
11	11:41301682	41301682	C	G	0.329	-0.117776	0.0319423	0.419132	0.000323403
11	11:41312828	41312828	A	C	0.329	-0.117776	0.0319423	0.419132	0.000323403
11	11:41334090	41334090	C	T	0.329	-0.117776	0.0319423	0.419132	0.000323403
11	11:41343691	41343691	G	A	0.329	-0.117776	0.0319423	0.419132	0.000323403
11	11:41395148	41395148	A	C	0.329	-0.117776	0.0319423	0.419132	0.000323403
11	11:41501631	41501631	A	G	0.329	-0.117776	0.0319423	0.419132	0.000323403
11	11:41522419	41522419	C	A	0.329	-0.117776	0.0319423	0.419132	0.000323403
5	5:51356426	51356426	G	A	0.252	0.126881	0.033679	0.357246	0.000323632
5	5:51362841	51362841	C	T	0.252	0.126881	0.033679	0.357246	0.000323632
11	11:41439503	41439503	A	G	0.333	-0.117331	0.0318315	0.4191	0.000324766
11	11:41506007	41506007	T	C	0.333	-0.117331	0.0318315	0.4191	0.000324766
4	4:37810709	37810709	G	A	0.226	0.13378	0.0361853	0.404486	0.000326269
4	4:37812908	37812908	A	G	0.226	0.13378	0.0361853	0.404486	0.000326269
4	4:37816573	37816573	T	C	0.226	0.13378	0.0361853	0.404486	0.000326269
33	33:31284997	31284997	A	G	0.308	-0.109405	0.0299026	0.449193	0.00032709
33	33:31338995	31338995	T	C	0.308	-0.109405	0.0299026	0.449193	0.00032709
11	11:39272712	39272712	A	G	0.35	-0.117136	0.0308704	0.341365	0.000332414
11	11:39293043	39293043	T	G	0.35	-0.117136	0.0308704	0.341365	0.000332414
5	5:66963341	66963341	T	A	0.103	-0.174564	0.0457519	0.327261	0.000333881
11	11:43187883	43187883	A	G	0.386	0.113644	0.0299383	0.338673	0.000334195
4	4:37777274	37777274	C	G	0.224	0.133186	0.0361548	0.405814	0.00034093
11	11:39443951	39443951	C	T	0.372	-0.113878	0.0310584	0.425463	0.000341668
5	5:51505600	51505600	T	C	0.11	0.169367	0.0463358	0.434866	0.000343227
5	5:51516730	51516730	C	T	0.11	0.169367	0.0463358	0.434866	0.000343227
11	11:39784897	39784897	A	G	0.342	-0.116552	0.0316682	0.406089	0.000349191
11	11:39695032	39695032	A	T	0.357	-0.116015	0.0307973	0.347208	0.000352304
4	4:36984122	36984122	G	A	0.222	0.13046	0.0358453	0.447538	0.000352509
4	4:37003704	37003704	G	A	0.222	0.13046	0.0358453	0.447538	0.000352509
10	10:65730711	65730711	G	A	0.369	-0.111251	0.0301891	0.395002	0.000352982
4	4:37859248	37859248	A	T	0.234	0.129757	0.035455	0.418195	0.000355603
11	11:43661361	43661361	G	A	0.466	-0.103193	0.0282777	0.428967	0.000358371
4	4:87194867	87194867	C	T	0.342	-0.111205	0.0306865	0.471882	0.000358987
4	4:87190276	87190276	C	T	0.35	-0.111258	0.0306808	0.462962	0.000360151
33	33:31316852	31316852	C	T	0.311	-0.108728	0.0299734	0.450166	0.000366054
11	11:39247073	39247073	T	A	0.366	-0.114029	0.0312565	0.423432	0.000368022
11	11:39256671	39256671	A	G	0.366	-0.114029	0.0312565	0.423432	0.000368022
4	4:27359764	27359764	C	T	0.093	0.181879	0.0495563	0.397324	0.000369457
11	11:39227633	39227633	A	G	0.361	-0.11307	0.031126	0.420576	0.000393596
20	20:7919590	7919590	G	A	0.111	0.162748	0.0443102	0.376779	0.000407242
5	5:52888098	52888098	C	T	0.308	0.124379	0.0343427	0.420755	0.000407284
4	4:87209668	87209668	A	G	0.254	-0.117779	0.0325639	0.42599	0.000408526
4	4:88259417	88259417	C	T	0.274	-0.115803	0.0321039	0.437418	0.000408639
11	11:39979644	39979644	G	T	0.342	-0.115616	0.0317825	0.405649	0.000409927
25	25:47771725	47771725	C	T	0.191	0.134091	0.0374634	0.520767	0.00041735
11	11:41430463	41430463	T	C	0.33	-0.115605	0.0319711	0.420941	0.000417551
28	28:18781648	18781648	T	G	0.165	0.136853	0.0382329	0.46869	0.000423598
33	33:31163735	31163735	T	C	0.309	-0.107324	0.0299293	0.450234	0.00042585
33	33:31173311	31173311	G	A	0.309	-0.107324	0.0299293	0.450234	0.00042585
33	33:31178251	31178251	C	T	0.309	-0.107324	0.0299293	0.450234	0.00042585
33	33:31181306	31181306	C	G	0.309	-0.107324	0.0299293	0.450234	0.00042585
33	33:31186365	31186365	C	A	0.309	-0.107324	0.0299293	0.450234	0.00042585
33	33:31243209	31243209	T	C	0.309	-0.107324	0.0299293	0.450234	0.00042585
33	33:31298411	31298411	G	A	0.309	-0.107324	0.0299293	0.450234	0.00042585
33	33:31320260	31320260	C	T	0.309	-0.107324	0.0299293	0.450234	0.00042585
33	33:31355332	31355332	G	A	0.309	-0.107324	0.0299293	0.450234	0.00042585
33	33:31361794	31361794	G	A	0.309	-0.107324	0.0299293	0.450234	0.00042585
33	33:31372851	31372851	T	C	0.309	-0.107324	0.0299293	0.450234	0.00042585
33	33:31059634	31059634	G	A	0.329	-0.104272	0.0290325	0.43527	0.000432416
4	4:86687863	86687863	A	G	0.252	-0.118298	0.0329371	0.433173	0.000438157
11	11:39589760	39589760	A	T	0.336	-0.114294	0.0314999	0.39744	0.000439905
11	11:39597535	39597535	T	C	0.336	-0.114294	0.0314999	0.39744	0.000439905
11	11:41200164	41200164	G	C	0.327	-0.115521	0.0320197	0.408724	0.000450935
11	11:41257293	41257293	C	T	0.33	-0.114934	0.0319437	0.41729	0.000451671
39	39:86833581	86833581	C	T	0.445	0.0861071	0.0242345	0.496519	0.00045602
39	39:86862023	86862023	C	T	0.445	0.0861071	0.0242345	0.496519	0.00045602
4	4:37869704	37869704	A	G	0.222	0.130238	0.0362389	0.410615	0.000465713
4	4:87853654	87853654	A	G	0.317	-0.107983	0.0303056	0.447246	0.00046745
11	11:44893230	44893230	C	T	0.246	0.127218	0.0357679	0.455863	0.000470202
11	11:44909368	44909368	C	T	0.246	0.127218	0.0357679	0.455863	0.000470202
5	5:68161126	68161126	A	G	0.071	-0.195336	0.0547271	0.428501	0.000478727
5	5:68189987	68189987	A	G	0.071	-0.195336	0.0547271	0.428501	0.000478727
4	4:86546714	86546714	A	G	0.248	-0.118506	0.0332775	0.439265	0.000480943
4	4:86569384	86569384	C	T	0.248	-0.118506	0.0332775	0.439265	0.000480943
4	4:86670021	86670021	C	T	0.356	-0.108825	0.0306952	0.464668	0.000481771
4	4:86673813	86673813	G	A	0.356	-0.108825	0.0306952	0.464668	0.000481771
11	11:38309432	38309432	G	A	0.457	-0.107725	0.0302563	0.43658	0.000485006
11	11:39627902	39627902	T	C	0.357	-0.11252	0.0306441	0.351025	0.000490039
4	4:36915669	36915669	C	T	0.218	0.129819	0.0365375	0.432194	0.000501833
11	11:39232451	39232451	C	T	0.36	-0.110911	0.0310986	0.418992	0.000503846
4	4:37057103	37057103	T	G	0.221	0.127007	0.0358559	0.443671	0.000506478
4	4:27352778	27352778	A	G	0.092	0.177995	0.0498227	0.402901	0.000516065
11	11:72118614	72118614	A	G	0.124	-0.155835	0.0441803	0.456613	0.000520699
4	4:36976685	36976685	A	G	0.216	0.129265	0.0365075	0.433259	0.000522876
4	4:87167492	87167492	T	C	0.392	-0.104388	0.0296836	0.469847	0.000529953
5	5:18769113	18769113	G	A	0.237	0.118701	0.0337201	0.456818	0.000533241
33	33:31226262	31226262	T	C	0.31	-0.105336	0.0299347	0.451388	0.000540897
33	33:31245030	31245030	T	C	0.31	-0.105336	0.0299347	0.451388	0.000540897
5	5:67431393	67431393	G	A	0.062	-0.203985	0.056646	0.372818	0.000541723
18	18:20337727	20337727	A	G	0.118	-0.157857	0.0445583	0.421173	0.000542933
18	18:20512575	20512575	A	C	0.118	-0.157857	0.0445583	0.421173	0.000542933
34	34:39124892	39124892	C	T	0.375	-0.106529	0.030377	0.532333	0.00054677
5	5:67718700	67718700	A	C	0.082	-0.177254	0.0498804	0.404962	0.000552005
11	11:38586644	38586644	T	A	0.355	-0.109454	0.0307677	0.399826	0.000560735
4	4:86573817	86573817	T	C	0.247	-0.117131	0.0333183	0.443159	0.000560899
4	4:87237471	87237471	C	T	0.25	-0.115569	0.0329025	0.433116	0.000582624
4	4:87145327	87145327	A	C	0.354	-0.106763	0.0305538	0.459795	0.000582731
4	4:35657164	35657164	T	C	0.214	0.126243	0.0360444	0.441187	0.000588093
33	33:31192782	31192782	C	T	0.31	-0.104307	0.0298559	0.448208	0.000595624
11	11:43370317	43370317	G	A	0.446	-0.0996268	0.0284318	0.4315	0.00060103
11	11:43379989	43379989	G	T	0.446	-0.0996268	0.0284318	0.4315	0.00060103
11	11:43161081	43161081	A	G	0.403	0.108594	0.0299472	0.344308	0.000605098
5	5:67937911	67937911	A	G	0.082	-0.17626	0.0499079	0.399521	0.000611527
4	4:86894351	86894351	A	G	0.245	-0.11712	0.0335563	0.443323	0.000613676
11	11:43576958	43576958	A	G	0.452	-0.0990451	0.0282532	0.421938	0.000616279
39	39:70142335	70142335	T	G	0.395	0.0841436	0.0240196	0.423009	0.000618752
33	33:31036221	31036221	A	G	0.318	-0.102573	0.0294898	0.455533	0.000620264
5	5:67135920	67135920	C	G	0.1	-0.168456	0.0464176	0.336645	0.00062182
16	16:50589557	50589557	A	T	0.372	0.106589	0.0299605	0.375913	0.000626359
33	33:2519875	2519875	T	G	0.422	0.104554	0.0293143	0.36804	0.000627226
33	33:2521904	2521904	A	G	0.422	0.104554	0.0293143	0.36804	0.000627226
33	33:2550328	2550328	T	G	0.422	0.104554	0.0293143	0.36804	0.000627226
10	10:59027509	59027509	A	T	0.183	0.126163	0.0364116	0.479434	0.000630511
10	10:59075135	59075135	A	G	0.183	0.126163	0.0364116	0.479434	0.000630511
11	11:72109642	72109642	A	G	0.409	0.106659	0.0308169	0.487405	0.000635372
11	11:41256177	41256177	T	C	0.35	-0.109258	0.0311504	0.410912	0.00064171
32	32:1781486	1781486	C	G	0.358	0.109262	0.0315534	0.541633	0.000646672
39	39:87387767	87387767	T	C	0.413	-0.0837028	0.0242223	0.51517	0.000647036
39	39:87395444	87395444	G	A	0.413	-0.0837028	0.0242223	0.51517	0.000647036
5	5:67872330	67872330	C	T	0.074	-0.18733	0.0538562	0.435821	0.000649319
11	11:72115391	72115391	T	C	0.408	0.107164	0.031039	0.483827	0.000656204
11	11:39633814	39633814	A	G	0.338	-0.110601	0.0315643	0.405054	0.000666304
11	11:39651104	39651104	A	G	0.338	-0.110601	0.0315643	0.405054	0.000666304
11	11:39682220	39682220	G	A	0.338	-0.110601	0.0315643	0.405054	0.000666304
7	7:12224994	12224994	T	C	0.106	-0.162877	0.0466166	0.410938	0.00066681
10	10:58929097	58929097	T	C	0.173	0.128952	0.0373719	0.473645	0.000667554
39	39:87431735	87431735	C	T	0.41	0.0852837	0.0246138	0.568022	0.000675007
4	4:87228984	87228984	G	A	0.254	-0.113262	0.0325676	0.425545	0.00067506
33	33:31237862	31237862	A	G	0.31	-0.103445	0.0299397	0.452163	0.000677262
4	4:37957314	37957314	T	C	0.219	0.126571	0.0363422	0.412669	0.00068887
4	4:37961765	37961765	C	T	0.219	0.126571	0.0363422	0.412669	0.00068887
4	4:37966180	37966180	G	A	0.219	0.126571	0.0363422	0.412669	0.00068887
11	11:43156655	43156655	A	T	0.403	0.106829	0.0297489	0.343734	0.000691112
11	11:72304693	72304693	G	A	0.123	-0.153723	0.0445428	0.448451	0.00069359
11	11:72343449	72343449	T	C	0.123	-0.153723	0.0445428	0.448451	0.00069359
18	18:50017504	50017504	C	T	0.411	0.0999297	0.0291218	0.513116	0.000703757
5	5:66869363	66869363	G	A	0.081	-0.182656	0.0510555	0.344256	0.000716257
5	5:66930530	66930530	T	G	0.081	-0.182656	0.0510555	0.344256	0.000716257
4	4:87202840	87202840	C	A	0.298	-0.106223	0.0307982	0.436593	0.00072197
4	4:87247731	87247731	G	A	0.288	-0.107082	0.0311212	0.444241	0.000728566
19	19:45614499	45614499	C	T	0.411	-0.100154	0.0290706	0.436083	0.000729431
4	4:87746035	87746035	T	C	0.421	-0.100079	0.0292337	0.475651	0.000731655
11	11:43403185	43403185	T	C	0.445	-0.0979341	0.0284035	0.432143	0.000731833
39	39:70530594	70530594	C	T	0.394	0.0827303	0.0239927	0.426379	0.000743855
4	4:87342869	87342869	C	T	0.297	-0.10606	0.0308813	0.44101	0.000750904
39	39:70608689	70608689	G	C	0.391	0.082704	0.0240408	0.430031	0.000756289
4	4:86785133	86785133	C	T	0.245	-0.11481	0.0335547	0.447057	0.000774677
4	4:88260762	88260762	G	A	0.276	-0.110011	0.0320891	0.430576	0.000790074
4	4:88265800	88265800	G	A	0.276	-0.110011	0.0320891	0.430576	0.000790074
4	4:87286475	87286475	T	C	0.251	-0.112817	0.0329264	0.429717	0.000798675
11	11:40987365	40987365	A	G	0.353	-0.108081	0.0314289	0.412149	0.000813697
10	10:58810397	58810397	T	G	0.172	0.127071	0.037463	0.479045	0.00081478
16	16:50595994	50595994	C	T	0.371	0.104317	0.0299637	0.377439	0.000816586
16	16:50614130	50614130	G	C	0.371	0.104317	0.0299637	0.377439	0.000816586
11	11:41112792	41112792	C	T	0.332	-0.110326	0.0320281	0.40598	0.000818663
11	11:41113722	41113722	A	C	0.332	-0.110326	0.0320281	0.40598	0.000818663
5	5:67292556	67292556	C	G	0.081	-0.178639	0.0505388	0.346537	0.00082223
4	4:88243128	88243128	C	T	0.274	-0.109551	0.0321272	0.438832	0.00082249
18	18:26629330	26629330	A	G	0.1	-0.156645	0.0462882	0.487626	0.000831252
10	10:59098676	59098676	T	C	0.184	0.123229	0.0364153	0.476817	0.000839021
11	11:44396684	44396684	C	T	0.426	0.103196	0.0303395	0.442496	0.000841132
39	39:70264869	70264869	T	C	0.397	0.0817416	0.0240182	0.437754	0.00084119
11	11:38415258	38415258	T	C	0.411	-0.103001	0.0296509	0.378271	0.000845073
33	33:2846440	2846440	A	G	0.404	0.103447	0.0298202	0.377268	0.000846365
33	33:2856186	2856186	T	C	0.404	0.103447	0.0298202	0.377268	0.000846365
5	5:52122080	52122080	G	C	0.081	0.178697	0.0527062	0.452347	0.000850069
5	5:52334192	52334192	A	G	0.081	0.178697	0.0527062	0.452347	0.000850069
5	5:52372662	52372662	A	T	0.081	0.178697	0.0527062	0.452347	0.000850069
5	5:52418358	52418358	C	G	0.081	0.178697	0.0527062	0.452347	0.000850069
39	39:69716885	69716885	T	C	0.396	0.0815162	0.0239989	0.440228	0.000855461
10	10:58904847	58904847	A	G	0.172	0.126473	0.0374529	0.475754	0.0008613
10	10:58919139	58919139	T	C	0.172	0.126473	0.0374529	0.475754	0.0008613
10	10:58946407	58946407	A	C	0.172	0.126473	0.0374529	0.475754	0.0008613
10	10:58985451	58985451	C	T	0.172	0.126473	0.0374529	0.475754	0.0008613
10	10:59001445	59001445	C	T	0.172	0.126473	0.0374529	0.475754	0.0008613
10	10:59010708	59010708	G	A	0.172	0.126473	0.0374529	0.475754	0.0008613
10	10:59062187	59062187	C	T	0.172	0.126473	0.0374529	0.475754	0.0008613
10	10:59081918	59081918	A	G	0.172	0.126473	0.0374529	0.475754	0.0008613
11	11:44126921	44126921	T	C	0.288	0.111528	0.0329652	0.45836	0.00086566
11	11:72286786	72286786	C	T	0.122	-0.151306	0.0446939	0.450952	0.000868273
11	11:72295228	72295228	C	T	0.122	-0.151306	0.0446939	0.450952	0.000868273
11	11:72300613	72300613	G	A	0.122	-0.151306	0.0446939	0.450952	0.000868273
11	11:72302658	72302658	G	A	0.122	-0.151306	0.0446939	0.450952	0.000868273
5	5:67218733	67218733	A	G	0.08	-0.179584	0.0512366	0.350217	0.00089051
4	4:87889498	87889498	A	G	0.367	-0.101186	0.030085	0.487466	0.000893319
11	11:42977249	42977249	T	C	0.426	0.102098	0.0299739	0.415777	0.000896944
39	39:70322728	70322728	A	G	0.393	0.0813582	0.0239876	0.428488	0.000900309
39	39:70523483	70523483	G	A	0.393	0.0813582	0.0239876	0.428488	0.000900309
39	39:70587689	70587689	G	A	0.393	0.0813582	0.0239876	0.428488	0.000900309
18	18:22746643	22746643	C	T	0.118	-0.147327	0.0432922	0.415366	0.000908649
5	5:18813067	18813067	C	T	0.194	0.125865	0.0369718	0.41175	0.000909103
5	5:18815452	18815452	A	G	0.194	0.125865	0.0369718	0.41175	0.000909103
5	5:51574818	51574818	C	T	0.211	0.124244	0.0357526	0.363258	0.000911161
5	5:51576974	51576974	C	T	0.211	0.124244	0.0357526	0.363258	0.000911161
11	11:43269715	43269715	T	A	0.469	0.0979111	0.0290662	0.454912	0.000914456
33	33:31002006	31002006	C	G	0.193	-0.122162	0.0362058	0.442704	0.000918311
4	4:36750905	36750905	C	T	0.218	0.123466	0.0364865	0.429046	0.000921469
11	11:39238924	39238924	C	G	0.324	-0.108556	0.0317415	0.398773	0.000923782
11	11:42712298	42712298	G	A	0.439	0.101757	0.0299404	0.414088	0.000928257
11	11:42735991	42735991	C	A	0.439	0.101757	0.0299404	0.414088	0.000928257
2	2:41427456	41427456	A	G	0.306	-0.112103	0.0330845	0.422507	0.000929122
11	11:38591241	38591241	C	G	0.474	-0.102305	0.0299646	0.400233	0.000931079
11	11:42380380	42380380	T	C	0.435	0.100426	0.0296652	0.425189	0.000932656
4	4:35670681	35670681	T	C	0.214	0.122123	0.0362446	0.442707	0.000934644
4	4:87553805	87553805	G	T	0.329	-0.10151	0.0301196	0.44256	0.000936474
39	39:70339651	70339651	A	G	0.398	0.0810079	0.024036	0.439795	0.000938431
11	11:72146632	72146632	C	T	0.06	-0.206549	0.0617204	0.511314	0.000944224
32	32:2025043	2025043	C	A	0.357	0.105496	0.0314905	0.53209	0.000946746
2	2:45461462	45461462	A	G	0.422	-0.103318	0.0306285	0.433614	0.000949367
2	2:45481653	45481653	G	A	0.422	-0.103318	0.0306285	0.433614	0.000949367
2	2:45491436	45491436	C	A	0.422	-0.103318	0.0306285	0.433614	0.000949367
2	2:45549200	45549200	A	G	0.422	-0.103318	0.0306285	0.433614	0.000949367
2	2:45767305	45767305	C	T	0.422	-0.103318	0.0306285	0.433614	0.000949367
7	7:80508298	80508298	C	A	0.481	0.0971277	0.0290216	0.476552	0.000953934
11	11:41624538	41624538	A	G	0.457	-0.101636	0.0297103	0.389637	0.000958631
11	11:41648808	41648808	A	T	0.457	-0.101636	0.0297103	0.389637	0.000958631
18	18:49610746	49610746	C	T	0.403	0.0987489	0.0292813	0.586044	0.000973901
18	18:50059772	50059772	T	C	0.41	0.0968544	0.0290616	0.50739	0.00098903
11	11:43272660	43272660	C	T	0.471	0.0969727	0.0290285	0.455552	0.00100551
4	4:82940887	82940887	T	C	0.383	-0.10391	0.030925	0.424946	0.00101631
11	11:25296606	25296606	A	G	0.345	-0.103732	0.0295348	0.329467	0.00101772
5	5:67394234	67394234	C	G	0.086	-0.171409	0.050318	0.382878	0.00102907
11	11:41090440	41090440	T	C	0.332	-0.108102	0.0320192	0.405461	0.00104239
11	11:41093697	41093697	G	A	0.332	-0.108102	0.0320192	0.405461	0.00104239
11	11:41095704	41095704	T	C	0.332	-0.108102	0.0320192	0.405461	0.00104239
2	2:40742075	40742075	C	T	0.322	-0.109707	0.0326832	0.420128	0.00104343
2	2:40742301	40742301	A	G	0.322	-0.109707	0.0326832	0.420128	0.00104343
39	39:70296297	70296297	G	T	0.395	0.0799908	0.0239546	0.440044	0.00104379
4	4:37746459	37746459	C	T	0.247	0.116029	0.0347504	0.436107	0.00105545
4	4:88060460	88060460	T	G	0.323	-0.100815	0.0302489	0.443922	0.00105967
5	5:67391851	67391851	G	A	0.096	-0.16186	0.0473701	0.371259	0.00106004
39	39:69620866	69620866	G	T	0.395	0.0798129	0.0239792	0.437828	0.00108975
39	39:70120804	70120804	A	T	0.395	0.0798129	0.0239792	0.437828	0.00108975
39	39:70194244	70194244	T	C	0.395	0.0798129	0.0239792	0.437828	0.00108975
39	39:70277585	70277585	T	G	0.395	0.0798129	0.0239792	0.437828	0.00108975
4	4:87538671	87538671	G	A	0.336	-0.100208	0.0301073	0.438643	0.00109254
11	11:72166676	72166676	C	T	0.402	0.102182	0.0309033	0.476705	0.00109472
18	18:22784913	22784913	G	A	0.121	-0.143701	0.0429732	0.419289	0.0010989
10	10:59162541	59162541	C	T	0.172	0.123933	0.0375185	0.477355	0.00110707
10	10:59170055	59170055	A	G	0.172	0.123933	0.0375185	0.477355	0.00110707
10	10:59187392	59187392	T	C	0.172	0.123933	0.0375185	0.477355	0.00110707
10	10:59187914	59187914	A	T	0.172	0.123933	0.0375185	0.477355	0.00110707
10	10:59196234	59196234	A	G	0.172	0.123933	0.0375185	0.477355	0.00110707
10	10:59203033	59203033	C	G	0.172	0.123933	0.0375185	0.477355	0.00110707
10	10:59207751	59207751	T	C	0.172	0.123933	0.0375185	0.477355	0.00110707
10	10:59211380	59211380	T	C	0.172	0.123933	0.0375185	0.477355	0.00110707
10	10:59229769	59229769	A	C	0.172	0.123933	0.0375185	0.477355	0.00110707
1	1:94797093	94797093	C	A	0.147	-0.137489	0.0414952	0.450612	0.00111352
10	10:58409392	58409392	T	C	0.176	0.122233	0.0370348	0.475139	0.0011199
4	4:88160194	88160194	T	G	0.274	-0.106694	0.0321203	0.435919	0.00112474
4	4:88177936	88177936	A	C	0.274	-0.106694	0.0321203	0.435919	0.00112474
4	4:88251655	88251655	G	A	0.274	-0.106694	0.0321203	0.435919	0.00112474
11	11:43508802	43508802	T	C	0.429	-0.0949815	0.0284772	0.41741	0.00113653
5	5:67970160	67970160	C	T	0.089	-0.162279	0.0489051	0.434964	0.00113685
5	5:67973446	67973446	T	A	0.089	-0.162279	0.0489051	0.434964	0.00113685
5	5:67973964	67973964	C	T	0.089	-0.162279	0.0489051	0.434964	0.00113685
5	5:67975806	67975806	G	C	0.089	-0.162279	0.0489051	0.434964	0.00113685
4	4:35936117	35936117	A	G	0.191	0.124844	0.0376007	0.432226	0.00113725
4	4:87540261	87540261	A	G	0.388	-0.0984697	0.0298166	0.456343	0.00114233
1	1:95166789	95166789	T	C	0.147	-0.136861	0.0414275	0.450281	0.0011516
10	10:65654039	65654039	G	A	0.418	0.0966277	0.0291557	0.430834	0.00116245
11	11:42763692	42763692	G	C	0.404	0.102145	0.029831	0.352697	0.00117765
34	34:38794134	38794134	C	T	0.329	-0.100061	0.0305132	0.499204	0.00118593
16	16:49554232	49554232	A	C	0.405	-0.0975717	0.0297438	0.4866	0.00118725
16	16:49554931	49554931	C	T	0.405	-0.0975717	0.0297438	0.4866	0.00118725
16	16:49556710	49556710	A	G	0.405	-0.0975717	0.0297438	0.4866	0.00118725
33	33:2508248	2508248	A	C	0.44	0.0980967	0.0293263	0.395278	0.00119073
33	33:2587781	2587781	T	C	0.456	0.0980337	0.0292863	0.392512	0.0011962
11	11:44394545	44394545	T	A	0.242	0.118093	0.0359136	0.454761	0.00120557
7	7:80515883	80515883	C	A	0.483	0.0957408	0.0292238	0.478933	0.00121089
7	7:80518063	80518063	A	G	0.483	0.0957408	0.0292238	0.478933	0.00121089
7	7:80523725	80523725	G	C	0.483	0.0957408	0.0292238	0.478933	0.00121089
7	7:80527127	80527127	C	T	0.483	0.0957408	0.0292238	0.478933	0.00121089
7	7:80531890	80531890	T	C	0.483	0.0957408	0.0292238	0.478933	0.00121089
39	39:87773150	87773150	A	G	0.403	0.0813008	0.0247434	0.551168	0.00121286
4	4:37731266	37731266	T	C	0.237	0.117111	0.0354599	0.430207	0.00121565
33	33:2672111	2672111	T	G	0.455	0.0974423	0.0292321	0.398534	0.00122137
33	33:2692953	2692953	C	G	0.455	0.0974423	0.0292321	0.398534	0.00122137
15	15:59733310	59733310	G	C	0.203	-0.12196	0.0372859	0.518715	0.00122588
11	11:42731007	42731007	A	C	0.442	0.0992023	0.0299194	0.415619	0.00122858
23	23:49492378	49492378	G	A	0.469	0.0922279	0.0279794	0.431766	0.00123002
23	23:49492757	49492757	C	T	0.469	0.0922279	0.0279794	0.431766	0.00123002
11	11:38982019	38982019	A	G	0.281	0.106882	0.0326225	0.465232	0.00123263
16	16:50505619	50505619	T	A	0.363	0.100463	0.0297047	0.367207	0.00123356
11	11:39305139	39305139	A	G	0.465	-0.100627	0.0302752	0.408258	0.00123472
18	18:23291239	23291239	G	A	0.125	-0.140108	0.0423007	0.41698	0.00123682
22	22:38381984	38381984	T	C	0.318	0.10294	0.0312343	0.432349	0.00123697
11	11:25250260	25250260	A	G	0.347	-0.101851	0.029575	0.335203	0.00124103
2	2:45370342	45370342	T	C	0.425	-0.100795	0.030643	0.433721	0.00126586
2	2:45422043	45422043	G	C	0.425	-0.100795	0.030643	0.433721	0.00126586
33	33:2823137	2823137	A	G	0.413	0.0994426	0.0296789	0.379409	0.00126663
18	18:24670968	24670968	T	C	0.118	-0.142235	0.0432266	0.431387	0.00126703
4	4:35599789	35599789	T	C	0.215	0.118284	0.0360703	0.443456	0.00127019
11	11:38307200	38307200	T	C	0.439	-0.099942	0.0306642	0.485396	0.00127692
11	11:38308478	38308478	T	C	0.439	-0.099942	0.0306642	0.485396	0.00127692
5	5:18168734	18168734	T	C	0.386	0.0960303	0.0293575	0.44706	0.00129468
39	39:88035109	88035109	T	C	0.393	0.0802693	0.0246515	0.529639	0.00130084
26	26:10762593	10762593	G	C	0.43	0.098264	0.0302304	0.514878	0.00131026
33	33:2632875	2632875	A	G	0.455	0.0970448	0.0292594	0.395493	0.00131074
5	5:18373317	18373317	T	C	0.369	0.0956284	0.0293042	0.444293	0.00133722
15	15:59743541	59743541	C	A	0.201	-0.121173	0.0373391	0.52035	0.00133826
15	15:59744289	59744289	C	T	0.201	-0.121173	0.0373391	0.52035	0.00133826
15	15:59758389	59758389	G	A	0.201	-0.121173	0.0373391	0.52035	0.00133826
33	33:29004603	29004603	C	T	0.128	0.137367	0.0421816	0.449938	0.0013495
33	33:29049564	29049564	G	A	0.128	0.137367	0.0421816	0.449938	0.0013495
5	5:18767024	18767024	T	A	0.195	0.121207	0.0369588	0.420564	0.00135273
21	21:47984733	47984733	C	A	0.453	-0.0946342	0.0290684	0.449721	0.0013583
11	11:25901513	25901513	T	C	0.34	-0.102053	0.0299707	0.340458	0.00136329
39	39:85702216	85702216	C	G	0.062	-0.149093	0.0460501	0.489727	0.0013667
11	11:43462079	43462079	C	T	0.429	-0.0933318	0.0284553	0.418465	0.00136794
11	11:43518308	43518308	T	C	0.429	-0.0933318	0.0284553	0.418465	0.00136794
26	26:10801722	10801722	T	C	0.437	0.0975171	0.0301494	0.496103	0.00137994
26	26:10825801	10825801	G	A	0.437	0.0975171	0.0301494	0.496103	0.00137994
22	22:60838313	60838313	T	C	0.421	-0.0940087	0.029045	0.48016	0.00138085
11	11:40134930	40134930	G	T	0.468	-0.100246	0.030439	0.404649	0.00139106
11	11:39166109	39166109	G	A	0.432	-0.098307	0.0296784	0.390342	0.00139182
26	26:10764629	10764629	T	G	0.432	0.0975591	0.0301962	0.507687	0.00139633
23	23:49493951	49493951	C	A	0.47	0.0912095	0.0280223	0.434281	0.00140522
11	11:72410496	72410496	C	T	0.391	-0.100899	0.0312257	0.529267	0.00141043
5	5:69530640	69530640	A	G	0.063	-0.184072	0.0564899	0.429692	0.00141125
4	4:87243179	87243179	A	T	0.295	-0.101079	0.0311648	0.447018	0.00142618
9	9:8118038	8118038	C	T	0.143	0.136114	0.0422295	0.502327	0.00143166
22	22:169935	169935	A	G	0.12	-0.141232	0.0435411	0.441039	0.00143757
22	22:181463	181463	C	G	0.12	-0.141232	0.0435411	0.441039	0.00143757
5	5:67534418	67534418	C	T	0.066	-0.186734	0.0564418	0.382815	0.00144029
4	4:88027210	88027210	T	C	0.283	-0.104412	0.0321122	0.432519	0.00144045
5	5:50788646	50788646	A	G	0.105	0.152944	0.0471517	0.440394	0.00144166
34	34:36559326	36559326	A	C	0.111	-0.145831	0.0452721	0.496062	0.00144219
33	33:2667112	2667112	G	A	0.455	0.0961663	0.0292958	0.400109	0.00144297
25	25:47544666	47544666	T	G	0.218	0.117438	0.0363926	0.540315	0.00145142
11	11:38724569	38724569	C	T	0.458	-0.0969473	0.0300038	0.458823	0.00145143
11	11:38724741	38724741	C	T	0.458	-0.0969473	0.0300038	0.458823	0.00145143
5	5:69414671	69414671	A	G	0.066	-0.181975	0.0558894	0.422901	0.00145515
11	11:43377715	43377715	G	A	0.435	-0.0930392	0.0285878	0.425453	0.00145578
11	11:43381098	43381098	G	A	0.435	-0.0930392	0.0285878	0.425453	0.00145578
11	11:44436868	44436868	T	C	0.24	0.11642	0.036089	0.466343	0.00145767
33	33:2803236	2803236	C	G	0.414	0.0982591	0.0297347	0.38275	0.00145795
4	4:87371489	87371489	C	T	0.317	-0.0981603	0.0302934	0.441687	0.00146186
20	20:6748518	6748518	T	C	0.466	-0.0979238	0.0301069	0.425154	0.00146231
22	22:60814424	60814424	A	G	0.466	-0.0919279	0.0284763	0.456672	0.00146473
2	2:45553030	45553030	T	G	0.424	-0.0995338	0.0306801	0.434773	0.00146953
39	39:31646437	31646437	T	C	0.246	-0.0900978	0.0272241	0.640962	0.00147748
11	11:39491109	39491109	T	C	0.45	-0.0996971	0.0308622	0.451387	0.00147816
11	11:39493172	39493172	G	A	0.45	-0.0996971	0.0308622	0.451387	0.00147816
4	4:35674056	35674056	C	T	0.194	0.122006	0.0375682	0.426572	0.001481
4	4:87946782	87946782	G	C	0.283	-0.103789	0.0320109	0.433497	0.0014815
4	4:87968151	87968151	A	G	0.283	-0.103789	0.0320109	0.433497	0.0014815
4	4:87978419	87978419	G	T	0.283	-0.103789	0.0320109	0.433497	0.0014815
4	4:88012969	88012969	A	G	0.283	-0.103789	0.0320109	0.433497	0.0014815
4	4:88022083	88022083	A	G	0.283	-0.103789	0.0320109	0.433497	0.0014815
18	18:49584912	49584912	C	G	0.446	0.0942884	0.0293113	0.531559	0.00148663
33	33:2580202	2580202	A	G	0.455	0.0959978	0.0292916	0.396709	0.00149202
33	33:2583192	2583192	A	G	0.455	0.0959978	0.0292916	0.396709	0.00149202
33	33:2583443	2583443	T	C	0.455	0.0959978	0.0292916	0.396709	0.00149202
33	33:2641001	2641001	T	C	0.455	0.0959978	0.0292916	0.396709	0.00149202
5	5:18543579	18543579	A	G	0.19	0.121064	0.037129	0.409105	0.00150574
5	5:18545890	18545890	G	A	0.19	0.121064	0.037129	0.409105	0.00150574
5	5:18719214	18719214	T	G	0.19	0.121064	0.037129	0.409105	0.00150574
5	5:18723682	18723682	C	T	0.19	0.121064	0.037129	0.409105	0.00150574
5	5:18723708	18723708	C	A	0.19	0.121064	0.037129	0.409105	0.00150574
5	5:18820320	18820320	T	C	0.19	0.121064	0.037129	0.409105	0.00150574
5	5:18841592	18841592	G	A	0.19	0.121064	0.037129	0.409105	0.00150574
25	25:47957746	47957746	C	T	0.138	0.13625	0.0424959	0.514685	0.00151977
11	11:44067873	44067873	A	C	0.443	0.0981733	0.0306213	0.483777	0.00152807
39	39:87518581	87518581	T	C	0.406	0.0795853	0.0247517	0.549948	0.00153384
5	5:27434510	27434510	G	C	0.198	0.117913	0.036798	0.5215	0.00153527
4	4:87942621	87942621	A	G	0.335	-0.0969645	0.0299966	0.432536	0.00153564
21	21:16985870	16985870	A	G	0.205	0.119525	0.0372483	0.464277	0.00154473
5	5:68154362	68154362	C	T	0.087	-0.159872	0.0496324	0.443191	0.00154481
5	5:68156671	68156671	G	A	0.087	-0.159872	0.0496324	0.443191	0.00154481
5	5:68156758	68156758	T	C	0.087	-0.159872	0.0496324	0.443191	0.00154481
4	4:28801355	28801355	G	A	0.082	0.17086	0.0528413	0.424897	0.00155703
4	4:28841693	28841693	A	G	0.082	0.17086	0.0528413	0.424897	0.00155703
11	11:44924662	44924662	C	T	0.231	0.115743	0.0361046	0.466697	0.0015577
11	11:44967009	44967009	C	T	0.231	0.115743	0.0361046	0.466697	0.0015577
4	4:87524786	87524786	T	C	0.287	-0.101872	0.0316027	0.438428	0.00155876
16	16:49392108	49392108	C	A	0.371	-0.0964477	0.0301405	0.48178	0.00156025
10	10:65646132	65646132	T	C	0.413	0.0933751	0.0291311	0.458803	0.00157426
18	18:26770100	26770100	C	T	0.106	-0.145274	0.045477	0.490296	0.0015796
2	2:45526306	45526306	A	G	0.424	-0.0985199	0.0305951	0.432338	0.00160475
11	11:40391750	40391750	A	C	0.467	-0.0991403	0.0304858	0.403821	0.0016065
10	10:65757413	65757413	C	T	0.408	0.0932509	0.0291291	0.453101	0.00161146
4	4:87810303	87810303	C	T	0.277	-0.102257	0.0317854	0.433122	0.00161437
4	4:87819038	87819038	C	T	0.277	-0.102257	0.0317854	0.433122	0.00161437
33	33:2432073	2432073	A	C	0.466	0.0942825	0.0290308	0.401158	0.00161982
10	10:65747051	65747051	A	G	0.402	0.0936057	0.029218	0.446279	0.00162209
5	5:52157124	52157124	T	C	0.082	0.167496	0.0524088	0.458539	0.00162673
4	4:35900216	35900216	T	C	0.202	0.117875	0.0367217	0.436721	0.00163037
4	4:35904536	35904536	A	G	0.202	0.117875	0.0367217	0.436721	0.00163037
22	22:60798569	60798569	G	T	0.42	-0.0921398	0.0289386	0.483455	0.00164135
26	26:10762847	10762847	C	T	0.429	0.0963233	0.0303252	0.511348	0.00167512
4	4:87460679	87460679	A	G	0.288	-0.101228	0.0316032	0.437005	0.00167548
4	4:87465060	87465060	A	G	0.288	-0.101228	0.0316032	0.437005	0.00167548
4	4:87473677	87473677	A	G	0.288	-0.101228	0.0316032	0.437005	0.00167548
5	5:67317674	67317674	C	A	0.081	-0.170128	0.0510767	0.34664	0.00168657
11	11:40097822	40097822	A	G	0.469	-0.0982779	0.0304344	0.409451	0.00169267
5	5:51337547	51337547	G	A	0.121	0.142818	0.0448005	0.450064	0.00169792
39	39:87333233	87333233	C	T	0.435	0.076635	0.0241549	0.514319	0.00169839
5	5:70031489	70031489	A	G	0.065	-0.179807	0.0562026	0.433816	0.00170066
5	5:70038034	70038034	A	C	0.065	-0.179807	0.0562026	0.433816	0.00170066
5	5:70040614	70040614	T	C	0.065	-0.179807	0.0562026	0.433816	0.00170066
5	5:70051904	70051904	A	C	0.065	-0.179807	0.0562026	0.433816	0.00170066
5	5:70063567	70063567	T	C	0.065	-0.179807	0.0562026	0.433816	0.00170066
10	10:65446757	65446757	T	C	0.41	0.0938075	0.0293275	0.433349	0.00170728
39	39:87969110	87969110	C	A	0.404	0.0786728	0.0247372	0.545502	0.00171016
4	4:87378272	87378272	C	T	0.316	-0.0966919	0.030302	0.444233	0.00171226
23	23:49613800	49613800	A	G	0.439	0.090557	0.0283733	0.436839	0.00172332
33	33:2342043	2342043	G	A	0.425	0.095728	0.0294086	0.383026	0.00172607
5	5:68876806	68876806	A	G	0.067	-0.180145	0.0564162	0.434558	0.00173266
39	39:70934122	70934122	A	G	0.448	0.0751044	0.023684	0.468214	0.00174083
32	32:2085560	2085560	T	G	0.421	0.0997891	0.0307053	0.632736	0.0017411
11	11:72389266	72389266	G	T	0.408	0.0965885	0.0304925	0.473434	0.0017497
11	11:72393548	72393548	C	T	0.408	0.0965885	0.0304925	0.473434	0.0017497
11	11:72400428	72400428	G	A	0.408	0.0965885	0.0304925	0.473434	0.0017497
11	11:72403386	72403386	A	G	0.408	0.0965885	0.0304925	0.473434	0.0017497
5	5:5911213	5911213	C	T	0.219	-0.115427	0.0350421	0.35772	0.00176423
23	23:49492069	49492069	G	A	0.472	0.0894716	0.0281196	0.440393	0.00176567
12	12:45144532	45144532	T	C	0.134	-0.135246	0.0426074	0.555076	0.00176663
4	4:87383326	87383326	C	T	0.313	-0.096883	0.030466	0.445257	0.00177069
16	16:50214844	50214844	T	A	0.399	-0.0958233	0.0303076	0.481412	0.00177159
4	4:87839532	87839532	A	G	0.277	-0.101737	0.0319366	0.43664	0.00177475
4	4:87841763	87841763	C	A	0.277	-0.101737	0.0319366	0.43664	0.00177475
22	22:60828698	60828698	G	A	0.466	-0.0903664	0.0285242	0.457596	0.00178576
26	26:32924746	32924746	A	G	0.141	0.131748	0.0417464	0.500017	0.00178916
26	26:32929681	32929681	C	T	0.141	0.131748	0.0417464	0.500017	0.00178916
1	1:93892100	93892100	C	T	0.385	0.0964009	0.0303648	0.445539	0.00179507
4	4:28583405	28583405	G	A	0.086	0.165761	0.0517516	0.413247	0.00179524
4	4:28798932	28798932	T	C	0.086	0.165761	0.0517516	0.413247	0.00179524
1	1:31148144	31148144	C	T	0.108	-0.149187	0.0472649	0.519413	0.00179607
1	1:31167515	31167515	A	T	0.108	-0.149187	0.0472649	0.519413	0.00179607
1	1:31203283	31203283	G	A	0.108	-0.149187	0.0472649	0.519413	0.00179607
1	1:31218562	31218562	C	T	0.108	-0.149187	0.0472649	0.519413	0.00179607
26	26:10732780	10732780	C	T	0.428	0.095734	0.0303448	0.508879	0.00179666
10	10:59219420	59219420	T	A	0.173	0.118243	0.0374464	0.475749	0.00180473
16	16:50908065	50908065	T	C	0.385	-0.0960641	0.0302304	0.439853	0.001805
18	18:21992393	21992393	C	A	0.118	-0.140328	0.04396	0.423894	0.00180589
23	23:51925168	51925168	C	T	0.33	0.0967069	0.0305445	0.453896	0.00180605
5	5:67517712	67517712	C	T	0.065	-0.183576	0.0568163	0.389676	0.00180791
5	5:67538682	67538682	G	C	0.065	-0.183576	0.0568163	0.389676	0.00180791
10	10:58418178	58418178	A	G	0.176	0.11712	0.0371152	0.474266	0.00182015
10	10:58418917	58418917	A	G	0.176	0.11712	0.0371152	0.474266	0.00182015
8	8:54139158	54139158	G	A	0.121	-0.142549	0.043631	0.368124	0.0018207
11	11:44555635	44555635	C	A	0.328	0.101122	0.0319509	0.452505	0.00182895
7	7:80221308	80221308	T	C	0.471	0.0911384	0.0289114	0.473587	0.00183993
7	7:80047215	80047215	A	G	0.47	0.0908797	0.0288092	0.465739	0.00184601
4	4:87828335	87828335	G	A	0.277	-0.100883	0.03179	0.436727	0.00184705
10	10:65621783	65621783	C	T	0.417	0.0924972	0.0292439	0.448244	0.00184811
11	11:39155602	39155602	C	A	0.435	-0.0958221	0.0303028	0.449226	0.00186338
5	5:52865418	52865418	A	C	0.27	0.111829	0.0352565	0.43359	0.00187443
5	5:70042678	70042678	A	C	0.082	-0.1589	0.0502784	0.444501	0.00188194
18	18:26658059	26658059	A	G	0.136	-0.129053	0.0408951	0.450961	0.00188847
18	18:26691185	26691185	T	G	0.136	-0.129053	0.0408951	0.450961	0.00188847
32	32:869643	869643	T	C	0.226	0.112342	0.0356454	0.550562	0.0018923
4	4:35714659	35714659	A	G	0.193	0.120105	0.0378386	0.426552	0.00189276
38	38:15491967	15491967	C	T	0.397	-0.0957933	0.0297692	0.389547	0.00189445
11	11:72552582	72552582	T	C	0.405	0.0958162	0.0305073	0.477608	0.00190274
32	32:1739884	1739884	T	C	0.223	-0.109639	0.0349246	0.529252	0.00191667
34	34:39263641	39263641	T	C	0.357	-0.0957299	0.030549	0.502655	0.00192458
7	7:13735564	13735564	T	C	0.099	-0.153061	0.0481928	0.41896	0.00192848
11	11:40272585	40272585	T	C	0.466	-0.0972905	0.0304594	0.40628	0.00192927
4	4:35809996	35809996	T	C	0.191	0.119761	0.0378423	0.427797	0.00194463
4	4:35877124	35877124	A	G	0.191	0.119761	0.0378423	0.427797	0.00194463
4	4:38119794	38119794	C	T	0.18	0.125556	0.0394271	0.409286	0.00195192
4	4:38120407	38120407	G	C	0.18	0.125556	0.0394271	0.409286	0.00195192
4	4:38122939	38122939	C	T	0.18	0.125556	0.0394271	0.409286	0.00195192
4	4:38130974	38130974	G	A	0.18	0.125556	0.0394271	0.409286	0.00195192
1	1:60478574	60478574	A	G	0.131	-0.13592	0.0430175	0.431104	0.00195571
11	11:41642756	41642756	T	C	0.432	-0.0966849	0.030034	0.385609	0.00195626
11	11:41577800	41577800	G	A	0.058	-0.189333	0.059927	0.430074	0.0019569
11	11:41581342	41581342	T	C	0.058	-0.189333	0.059927	0.430074	0.0019569
11	11:25262083	25262083	T	C	0.347	-0.0973583	0.0294921	0.340323	0.00196053
7	7:77831334	77831334	C	G	0.164	-0.117266	0.0374764	0.485495	0.00196397
5	5:50870907	50870907	T	C	0.107	0.147662	0.0468708	0.439279	0.00197117
1	1:95165812	95165812	C	T	0.15	-0.128678	0.0409572	0.450632	0.00197614
10	10:65376166	65376166	G	A	0.411	0.0923588	0.0293067	0.436113	0.0019805
10	10:65580025	65580025	C	T	0.353	-0.0944816	0.0297799	0.41287	0.0019831
5	5:52923099	52923099	A	G	0.372	-0.0984246	0.0314948	0.514174	0.0019837
26	26:15967980	15967980	T	C	0.154	-0.126918	0.0406312	0.493924	0.0019907
26	26:15986192	15986192	A	G	0.154	-0.126918	0.0406312	0.493924	0.0019907
26	26:16038557	16038557	T	C	0.154	-0.126918	0.0406312	0.493924	0.0019907
26	26:16074699	16074699	T	C	0.154	-0.126918	0.0406312	0.493924	0.0019907
5	5:67102163	67102163	A	G	0.092	-0.154128	0.0481535	0.391829	0.00199228
36	36:28599541	28599541	A	G	0.279	0.101483	0.0324744	0.482915	0.00199276
11	11:41604259	41604259	T	G	0.06	-0.185986	0.0589441	0.426781	0.00200311
9	9:8110716	8110716	A	C	0.143	0.131657	0.0421795	0.49638	0.00200457
9	9:8112410	8112410	G	A	0.143	0.131657	0.0421795	0.49638	0.00200457
33	33:2779935	2779935	G	A	0.43	0.0947435	0.0297388	0.399475	0.00200465
11	11:38273420	38273420	C	A	0.411	-0.0964791	0.0303525	0.407944	0.00200505
11	11:44070751	44070751	T	A	0.483	0.0968488	0.0309415	0.542924	0.00200598
33	33:29108128	29108128	G	A	0.129	0.132343	0.0421343	0.443645	0.00200991
11	11:40401612	40401612	A	T	0.468	-0.0972673	0.0305688	0.404227	0.0020278
11	11:40402300	40402300	G	T	0.468	-0.0972673	0.0305688	0.404227	0.0020278
18	18:21636793	21636793	A	C	0.128	-0.135921	0.0430602	0.423708	0.00203535
11	11:44441862	44441862	T	C	0.508	0.0981347	0.0314264	0.537012	0.00203752
11	11:44444940	44444940	A	G	0.508	0.0981347	0.0314264	0.537012	0.00203752
16	16:50620659	50620659	A	T	0.386	-0.0952749	0.0302829	0.433543	0.00203943
38	38:8838556	8838556	G	A	0.062	-0.188949	0.0603882	0.553345	0.00205477
11	11:39432972	39432972	T	C	0.093	-0.151947	0.0477973	0.39726	0.00206029
5	5:18541208	18541208	T	C	0.219	0.111349	0.035052	0.401046	0.00206049
10	10:65625065	65625065	C	T	0.419	0.0912079	0.0291784	0.452598	0.00206859
34	34:36543394	36543394	A	G	0.1	-0.148216	0.0476183	0.487921	0.00206915
18	18:49730492	49730492	C	T	0.371	0.0919441	0.0295489	0.487754	0.00207484
18	18:49756786	49756786	C	T	0.371	0.0919441	0.0295489	0.487754	0.00207484
18	18:49772498	49772498	C	T	0.371	0.0919441	0.0295489	0.487754	0.00207484
18	18:49778001	49778001	A	C	0.371	0.0919441	0.0295489	0.487754	0.00207484
18	18:49782723	49782723	C	T	0.371	0.0919441	0.0295489	0.487754	0.00207484
4	4:87730107	87730107	T	G	0.278	-0.0998213	0.0317996	0.434053	0.00208393
4	4:87774409	87774409	A	G	0.278	-0.0998213	0.0317996	0.434053	0.00208393
4	4:87522635	87522635	A	G	0.288	-0.0991289	0.0315967	0.43576	0.00208905
26	26:16051609	16051609	T	C	0.165	-0.122362	0.0393699	0.495208	0.00209385
5	5:18244932	18244932	G	C	0.391	0.0916709	0.0294133	0.462087	0.00209953
5	5:18249085	18249085	G	A	0.391	0.0916709	0.0294133	0.462087	0.00209953
5	5:18249429	18249429	C	A	0.391	0.0916709	0.0294133	0.462087	0.00209953
34	34:36393837	36393837	T	G	0.114	-0.139759	0.0449746	0.485527	0.00210669
18	18:24511670	24511670	A	G	0.116	-0.136279	0.0434315	0.430481	0.00211475
8	8:59325938	59325938	G	A	0.073	-0.17561	0.0565463	0.481157	0.0021254
18	18:20174137	20174137	C	T	0.147	-0.12697	0.040434	0.426468	0.00212726
4	4:87437335	87437335	C	T	0.288	-0.0989759	0.031608	0.434465	0.00213855
8	8:54141220	54141220	G	C	0.104	-0.150133	0.0465633	0.364136	0.00214759
22	22:60794606	60794606	A	G	0.422	-0.0897491	0.0289423	0.485394	0.00215122
18	18:26664420	26664420	G	A	0.109	-0.13863	0.0447409	0.489749	0.00216383
7	7:80446795	80446795	C	T	0.477	0.0904981	0.029154	0.468443	0.00216685
5	5:51605754	51605754	A	G	0.079	0.165761	0.0531724	0.443568	0.00217362
20	20:5790423	5790423	C	T	0.462	-0.093895	0.0300813	0.435679	0.00219094
20	20:5790779	5790779	C	T	0.462	-0.093895	0.0300813	0.435679	0.00219094
1	1:93897684	93897684	G	A	0.422	0.0926209	0.0298337	0.460123	0.00219368
5	5:53284866	53284866	C	T	0.328	0.103427	0.0331914	0.442412	0.00219695
5	5:52751048	52751048	C	A	0.37	-0.0977827	0.0316159	0.512807	0.00220175
5	5:52758138	52758138	A	G	0.37	-0.0977827	0.0316159	0.512807	0.00220175
5	5:52758675	52758675	A	G	0.37	-0.0977827	0.0316159	0.512807	0.00220175
5	5:18526731	18526731	C	T	0.191	0.116371	0.0371158	0.417944	0.00220892
5	5:18860484	18860484	A	G	0.191	0.116371	0.0371158	0.417944	0.00220892
13	13:22374120	22374120	G	C	0.158	-0.122386	0.0395871	0.483836	0.00222172
38	38:7693801	7693801	T	C	0.075	-0.17396	0.0556511	0.583216	0.00222596
38	38:7702934	7702934	T	G	0.075	-0.17396	0.0556511	0.583216	0.00222596
16	16:58428692	58428692	A	C	0.374	-0.092003	0.0297842	0.49238	0.00222952
10	10:65843611	65843611	G	C	0.346	-0.0955196	0.0303303	0.403147	0.00223153
2	2:37541085	37541085	G	A	0.217	-0.114007	0.0365975	0.431391	0.00227025
11	11:38831855	38831855	G	A	0.415	-0.0948444	0.0297524	0.377777	0.00227362
16	16:50525578	50525578	C	T	0.386	-0.0944254	0.0303611	0.436327	0.00227616
16	16:50605179	50605179	T	C	0.386	-0.0944254	0.0303611	0.436327	0.00227616
10	10:58174916	58174916	T	G	0.177	0.114503	0.0370864	0.47254	0.00227707
25	25:47436871	47436871	A	G	0.214	0.112605	0.0364621	0.53742	0.00228164
36	36:28718715	28718715	G	A	0.477	-0.0879694	0.0285345	0.478131	0.00229384
5	5:10149640	10149640	G	A	0.142	-0.134121	0.043241	0.441686	0.0022951
11	11:34088748	34088748	C	T	0.046	-0.214105	0.0684231	0.410113	0.00231369
11	11:34091421	34091421	A	C	0.046	-0.214105	0.0684231	0.410113	0.00231369
33	33:27906635	27906635	G	T	0.168	0.11968	0.0384292	0.424476	0.00231426
16	16:50523361	50523361	T	C	0.386	-0.0942739	0.0303719	0.436762	0.00231839
10	10:65813716	65813716	C	T	0.352	-0.0943326	0.0300937	0.405251	0.00232003
33	33:29200720	29200720	A	G	0.126	0.133121	0.0430722	0.451	0.00232855
12	12:45183686	45183686	T	G	0.133	-0.131645	0.0426477	0.550362	0.0023318
38	38:15535272	15535272	C	T	0.396	-0.0936289	0.0298287	0.400568	0.00233694
11	11:44375929	44375929	A	T	0.28	0.106842	0.0347206	0.527214	0.002337
5	5:18635183	18635183	G	T	0.223	0.108935	0.0350628	0.428421	0.00234135
4	4:28974146	28974146	C	T	0.086	0.164342	0.0528754	0.426307	0.00234592
4	4:29035673	29035673	G	A	0.086	0.164342	0.0528754	0.426307	0.00234592
4	4:29036066	29036066	A	G	0.086	0.164342	0.0528754	0.426307	0.00234592
4	4:29066853	29066853	G	A	0.086	0.164342	0.0528754	0.426307	0.00234592
7	7:80223404	80223404	G	A	0.47	0.0891192	0.0289666	0.470445	0.00236293
10	10:65551157	65551157	T	G	0.431	0.0892498	0.0288689	0.441546	0.00237182
11	11:72106705	72106705	T	G	0.417	0.0948294	0.030887	0.486379	0.00237594
11	11:41628471	41628471	G	A	0.446	-0.0941999	0.0298517	0.388282	0.00238471
12	12:45379139	45379139	A	G	0.132	-0.131785	0.0428799	0.53552	0.00238536
12	12:46472904	46472904	T	C	0.132	-0.131785	0.0428799	0.53552	0.00238536
5	5:70244358	70244358	T	C	0.063	-0.176905	0.057437	0.455486	0.00238811
11	11:41928766	41928766	A	C	0.083	-0.157164	0.0510117	0.450402	0.00240236
39	39:87546053	87546053	T	C	0.417	0.0755543	0.0245765	0.543767	0.00241187
5	5:69390814	69390814	G	A	0.064	-0.174649	0.0563954	0.429055	0.00241484
5	5:69454757	69454757	C	T	0.064	-0.174649	0.0563954	0.429055	0.00241484
5	5:69459667	69459667	G	A	0.064	-0.174649	0.0563954	0.429055	0.00241484
5	5:69513965	69513965	A	C	0.064	-0.174649	0.0563954	0.429055	0.00241484
5	5:69523188	69523188	A	G	0.064	-0.174649	0.0563954	0.429055	0.00241484
25	25:47253148	47253148	G	T	0.186	0.119337	0.0388897	0.532695	0.00241794
4	4:37770624	37770624	G	A	0.236	0.111456	0.0358755	0.418834	0.00242409
4	4:37782390	37782390	T	C	0.236	0.111456	0.0358755	0.418834	0.00242409
4	4:37785687	37785687	G	A	0.236	0.111456	0.0358755	0.418834	0.00242409
11	11:72671069	72671069	T	C	0.346	0.0977387	0.0317241	0.446949	0.00242752
7	7:79949080	79949080	T	C	0.476	0.0887404	0.0289694	0.478173	0.00244544
7	7:79952394	79952394	C	G	0.476	0.0887404	0.0289694	0.478173	0.00244544
38	38:15511221	15511221	C	T	0.398	-0.0936762	0.029814	0.388579	0.00244954
1	1:113182654	113182654	C	A	0.337	-0.0958999	0.0309255	0.590378	0.00245566
11	11:72551146	72551146	T	A	0.404	0.093597	0.0305592	0.473674	0.00246002
29	29:40856344	40856344	T	C	0.447	0.0900319	0.0290505	0.418874	0.00246348
4	4:28789440	28789440	C	T	0.081	0.164158	0.0529746	0.420361	0.00246557
4	4:85643413	85643413	C	T	0.469	-0.0896342	0.0291158	0.445031	0.0024675
11	11:41932202	41932202	A	C	0.083	-0.155049	0.0505293	0.455983	0.00247371
18	18:50004153	50004153	G	A	0.339	0.0935841	0.0305401	0.53995	0.00247581
11	11:72564375	72564375	T	C	0.403	0.0940204	0.0307156	0.472152	0.00247885
11	11:72596232	72596232	C	T	0.403	0.0940204	0.0307156	0.472152	0.00247885
2	2:49861743	49861743	A	G	0.28	-0.10431	0.0338488	0.436787	0.00248758
7	7:80598986	80598986	C	T	0.492	0.0886024	0.0289754	0.473186	0.0025002
5	5:5751553	5751553	C	T	0.183	-0.118782	0.0369897	0.346445	0.00250175
11	11:41606527	41606527	G	T	0.444	-0.0940321	0.0299409	0.388317	0.00250353
33	33:27882837	27882837	G	A	0.154	0.12202	0.0395579	0.430009	0.00250564
2	2:45383743	45383743	G	A	0.417	-0.0949101	0.030897	0.447561	0.0025068
11	11:68853678	68853678	G	A	0.474	0.0958822	0.0314166	0.495052	0.00251038
23	23:49253828	49253828	G	A	0.45	0.0864291	0.0281914	0.451812	0.00251293
21	21:19346662	19346662	A	G	0.1	-0.146209	0.0477021	0.453396	0.00251917
20	20:7834774	7834774	G	A	0.059	0.183086	0.0586148	0.39643	0.00252233
10	10:58254608	58254608	A	G	0.18	0.112551	0.0368108	0.467152	0.00252489
20	20:5752597	5752597	G	A	0.462	-0.0923743	0.0300533	0.439172	0.00253367
20	20:5758789	5758789	T	C	0.462	-0.0923743	0.0300533	0.439172	0.00253367
20	20:5764045	5764045	C	T	0.462	-0.0923743	0.0300533	0.439172	0.00253367
20	20:5764526	5764526	C	T	0.462	-0.0923743	0.0300533	0.439172	0.00253367
10	10:65627278	65627278	A	G	0.418	0.0891913	0.0291452	0.454282	0.00255013
4	4:85801412	85801412	G	C	0.464	-0.0890798	0.029137	0.46169	0.00255158
22	22:38811696	38811696	T	C	0.375	0.0928869	0.0296156	0.383848	0.00256517
5	5:68263257	68263257	A	G	0.13	-0.130207	0.0426604	0.464969	0.00257309
5	5:68276474	68276474	A	G	0.13	-0.130207	0.0426604	0.464969	0.00257309
5	5:52726873	52726873	G	A	0.371	-0.0964069	0.031672	0.516257	0.00258062
5	5:18133389	18133389	T	C	0.316	0.0940394	0.0307541	0.45204	0.00258724
28	28:18098368	18098368	A	G	0.414	0.0898428	0.0295211	0.51781	0.00258786
28	28:18123385	18123385	G	A	0.414	0.0898428	0.0295211	0.51781	0.00258786
33	33:29025984	29025984	C	T	0.115	0.134712	0.044152	0.459813	0.00260144
33	33:29033290	29033290	A	G	0.115	0.134712	0.044152	0.459813	0.00260144
11	11:43984954	43984954	C	T	0.226	0.110507	0.036196	0.458301	0.00260515
11	11:43999082	43999082	A	G	0.226	0.110507	0.036196	0.458301	0.00260515
11	11:44007821	44007821	G	A	0.226	0.110507	0.036196	0.458301	0.00260515
11	11:44010149	44010149	A	G	0.226	0.110507	0.036196	0.458301	0.00260515
5	5:52919288	52919288	C	A	0.371	-0.096296	0.0316684	0.515213	0.00260546
16	16:51095442	51095442	A	G	0.339	0.0952443	0.0302618	0.375724	0.0026058
38	38:9279824	9279824	A	G	0.061	-0.187816	0.061506	0.550182	0.00260623
1	1:59953389	59953389	G	A	0.119	-0.136654	0.0446809	0.446776	0.00260687
11	11:42072034	42072034	C	A	0.4	-0.0940157	0.030709	0.445098	0.0026094
11	11:42074421	42074421	A	T	0.4	-0.0940157	0.030709	0.445098	0.0026094
5	5:50956831	50956831	G	A	0.254	0.108429	0.0338596	0.346906	0.00261786
12	12:45832574	45832574	G	T	0.131	-0.131865	0.0432914	0.539859	0.00261817
12	12:45836375	45836375	C	T	0.131	-0.131865	0.0432914	0.539859	0.00261817
12	12:45874210	45874210	A	C	0.131	-0.131865	0.0432914	0.539859	0.00261817
12	12:45893985	45893985	G	T	0.131	-0.131865	0.0432914	0.539859	0.00261817
12	12:46275499	46275499	C	T	0.131	-0.131865	0.0432914	0.539859	0.00261817
24	24:47325890	47325890	C	T	0.49	-0.0857338	0.0280459	0.446301	0.00261875
1	1:95301923	95301923	C	T	0.165	-0.12189	0.0398975	0.450005	0.00262083
1	1:95313431	95313431	C	T	0.165	-0.12189	0.0398975	0.450005	0.00262083
11	11:72413581	72413581	T	C	0.393	-0.0943214	0.0310482	0.517408	0.00263141
4	4:87298280	87298280	G	T	0.399	-0.0916405	0.0299835	0.444796	0.00264618
21	21:19166535	19166535	T	C	0.087	-0.152704	0.0501862	0.466102	0.00264694
10	10:65556625	65556625	T	C	0.432	0.0883449	0.0289343	0.445528	0.0026577
5	5:68997448	68997448	A	G	0.066	-0.171298	0.0559669	0.435907	0.00266057
5	5:69016957	69016957	G	C	0.066	-0.171298	0.0559669	0.435907	0.00266057
20	20:5846292	5846292	G	C	0.472	-0.0914401	0.0299901	0.450018	0.00267271
1	1:95354342	95354342	A	G	0.166	-0.121219	0.0398126	0.454634	0.00268356
38	38:630458	630458	G	A	0.187	0.111117	0.0366469	0.523864	0.00269441
38	38:631805	631805	A	G	0.187	0.111117	0.0366469	0.523864	0.00269441
38	38:636544	636544	T	C	0.187	0.111117	0.0366469	0.523864	0.00269441
11	11:44950265	44950265	A	G	0.225	0.1112	0.0366527	0.475132	0.00269736
11	11:44950649	44950649	T	G	0.225	0.1112	0.0366527	0.475132	0.00269736
11	11:44974600	44974600	G	A	0.225	0.1112	0.0366527	0.475132	0.00269736
5	5:26743467	26743467	A	C	0.222	0.1084	0.0357051	0.537127	0.00269753
36	36:28527094	28527094	G	A	0.426	-0.0904748	0.0298438	0.480178	0.00269957
33	33:2369871	2369871	G	A	0.442	0.0910053	0.0294476	0.40277	0.00270845
29	29:40876961	40876961	G	A	0.444	0.089265	0.0291126	0.422189	0.0027119
29	29:40849222	40849222	C	T	0.317	-0.095168	0.0314077	0.525325	0.00271635
25	25:47278924	47278924	G	T	0.131	0.130689	0.0431524	0.523006	0.00272422
32	32:817990	817990	C	A	0.229	0.108129	0.0356118	0.545333	0.00272606
5	5:67477653	67477653	A	G	0.06	-0.182642	0.0594003	0.413835	0.00273203
5	5:67478651	67478651	A	G	0.06	-0.182642	0.0594003	0.413835	0.00273203
11	11:44733377	44733377	A	G	0.509	0.0952497	0.0314044	0.541044	0.00273487
11	11:44740504	44740504	G	C	0.509	0.0952497	0.0314044	0.541044	0.00273487
11	11:44742539	44742539	A	T	0.509	0.0952497	0.0314044	0.541044	0.00273487
11	11:44765772	44765772	C	T	0.509	0.0952497	0.0314044	0.541044	0.00273487
11	11:44766831	44766831	G	A	0.509	0.0952497	0.0314044	0.541044	0.00273487
11	11:44774023	44774023	A	G	0.509	0.0952497	0.0314044	0.541044	0.00273487
18	18:50038225	50038225	A	G	0.339	0.0923936	0.0304899	0.533743	0.00273841
5	5:67483280	67483280	T	C	0.075	-0.161215	0.0514132	0.371235	0.00274448
5	5:1875771	1875771	G	T	0.208	-0.114306	0.035896	0.347475	0.00274791
5	5:1884756	1884756	T	C	0.208	-0.114306	0.035896	0.347475	0.00274791
5	5:1891368	1891368	G	A	0.208	-0.114306	0.035896	0.347475	0.00274791
9	9:47541269	47541269	C	A	0.046	0.206683	0.068294	0.525099	0.00274875
9	9:47541646	47541646	C	T	0.046	0.206683	0.068294	0.525099	0.00274875
9	9:47545952	47545952	G	C	0.046	0.206683	0.068294	0.525099	0.00274875
2	2:41911066	41911066	C	T	0.321	-0.101025	0.0328914	0.41554	0.00275421
10	10:65354899	65354899	T	C	0.35	-0.0909274	0.0296246	0.415426	0.00275533
5	5:68917008	68917008	T	G	0.099	-0.144549	0.0472986	0.428755	0.00275821
5	5:68919666	68919666	C	A	0.099	-0.144549	0.0472986	0.428755	0.00275821
5	5:68928039	68928039	A	G	0.099	-0.144549	0.0472986	0.428755	0.00275821
34	34:36095899	36095899	A	G	0.118	-0.132701	0.0439133	0.491102	0.00276515
4	4:26683402	26683402	T	C	0.053	0.194088	0.0633267	0.418214	0.00277135
38	38:6942465	6942465	C	T	0.068	-0.175266	0.0578757	0.539051	0.00277614
8	8:68370988	68370988	C	G	0.371	0.0913903	0.0302404	0.481986	0.00277678
8	8:68375915	68375915	G	A	0.371	0.0913903	0.0302404	0.481986	0.00277678
20	20:5790607	5790607	G	A	0.472	-0.0911549	0.0300039	0.447894	0.00278039
20	20:5793884	5793884	C	A	0.472	-0.0911549	0.0300039	0.447894	0.00278039
20	20:5831313	5831313	G	T	0.472	-0.0911549	0.0300039	0.447894	0.00278039
4	4:38124117	38124117	G	A	0.179	0.121543	0.0394673	0.406851	0.00278166
18	18:20126979	20126979	T	C	0.143	-0.124413	0.0407713	0.432357	0.00278352
18	18:20134733	20134733	T	C	0.143	-0.124413	0.0407713	0.432357	0.00278352
18	18:20141898	20141898	T	C	0.143	-0.124413	0.0407713	0.432357	0.00278352
18	18:20182032	20182032	G	A	0.143	-0.124413	0.0407713	0.432357	0.00278352
4	4:86306615	86306615	T	C	0.467	-0.0872089	0.0287014	0.447844	0.00278689
33	33:1345049	1345049	C	A	0.44	0.0896692	0.0290887	0.401728	0.0027898
5	5:51121414	51121414	T	C	0.212	0.112786	0.0360778	0.375331	0.00279244
12	12:45383946	45383946	A	G	0.131	-0.130153	0.0430232	0.539276	0.00279573
5	5:51450652	51450652	C	T	0.124	0.137424	0.0447573	0.411805	0.00279866
20	20:6800841	6800841	T	G	0.062	0.174211	0.0564993	0.401653	0.00280089
16	16:49162190	49162190	T	C	0.397	-0.0893896	0.0295885	0.477245	0.00280174
18	18:16707531	16707531	T	C	0.073	-0.166485	0.0543563	0.418493	0.00280214
33	33:2353216	2353216	T	C	0.457	0.0902816	0.0293421	0.403892	0.00281646
20	20:49476448	49476448	C	T	0.324	-0.096491	0.0316559	0.428645	0.00282117
11	11:72634932	72634932	A	G	0.346	0.0962012	0.0316615	0.44088	0.00282333
11	11:72636998	72636998	C	G	0.346	0.0962012	0.0316615	0.44088	0.00282333
5	5:10126071	10126071	C	G	0.141	-0.131499	0.0433086	0.442943	0.00282466
5	5:17775571	17775571	T	C	0.379	0.0898347	0.0296073	0.442108	0.00285458
4	4:35570417	35570417	C	T	0.216	0.109206	0.0359805	0.440853	0.00285594
21	21:19116410	19116410	G	A	0.089	-0.150553	0.0498029	0.457679	0.00285788
16	16:58276517	58276517	G	A	0.365	-0.0901576	0.0299445	0.506309	0.00285836
10	10:65488050	65488050	T	C	0.37	-0.0902453	0.0294394	0.408661	0.00286087
11	11:44714130	44714130	A	C	0.27	0.10373	0.0342281	0.446155	0.00286712
11	11:44714208	44714208	A	C	0.27	0.10373	0.0342281	0.446155	0.00286712
16	16:50531062	50531062	A	G	0.386	-0.0920657	0.0303178	0.4384	0.00286739
16	16:50538175	50538175	T	C	0.386	-0.0920657	0.0303178	0.4384	0.00286739
20	20:6760793	6760793	A	G	0.06	0.175899	0.0571257	0.399145	0.00287504
20	20:6788859	6788859	G	C	0.06	0.175899	0.0571257	0.399145	0.00287504
5	5:68784813	68784813	T	C	0.065	-0.172631	0.0569198	0.440235	0.00287505
32	32:1842985	1842985	G	C	0.386	0.0927946	0.0307634	0.538983	0.00287869
4	4:28264255	28264255	A	G	0.067	0.172516	0.0567037	0.428272	0.00287894
39	39:69719634	69719634	C	A	0.191	-0.0869	0.0288854	0.502704	0.00287908
22	22:60720109	60720109	A	G	0.238	0.102254	0.0336763	0.434691	0.00288377
18	18:49997080	49997080	G	A	0.344	0.0921437	0.0305516	0.540818	0.00289257
5	5:10154548	10154548	A	G	0.141	-0.131273	0.0433664	0.443391	0.0029058
5	5:10156637	10156637	A	C	0.141	-0.131273	0.0433664	0.443391	0.0029058
5	5:10158123	10158123	T	G	0.141	-0.131273	0.0433664	0.443391	0.0029058
13	13:52621868	52621868	A	G	0.241	-0.103014	0.0340842	0.449157	0.00291017
38	38:8221493	8221493	C	T	0.063	-0.181688	0.0601027	0.557324	0.00291429
4	4:84399401	84399401	A	G	0.443	-0.0876208	0.0290704	0.463449	0.0029188
5	5:2704562	2704562	T	C	0.119	-0.141672	0.0444417	0.336004	0.00292342
20	20:5788678	5788678	C	T	0.463	-0.0910489	0.0300157	0.433281	0.00293061
34	34:38775333	38775333	T	C	0.359	-0.0904284	0.0300929	0.522056	0.00293264
32	32:1391587	1391587	C	G	0.23	0.1068	0.0354835	0.53969	0.00294
20	20:49451562	49451562	C	T	0.319	-0.0962886	0.0318585	0.442816	0.00294726
5	5:2336413	2336413	A	G	0.223	-0.108659	0.0346795	0.361885	0.00295061
5	5:2392817	2392817	G	C	0.223	-0.108659	0.0346795	0.361885	0.00295061
5	5:2524389	2524389	G	T	0.223	-0.108659	0.0346795	0.361885	0.00295061
1	1:59189778	59189778	G	A	0.111	-0.139808	0.0462693	0.442606	0.00295964
1	1:59324087	59324087	A	G	0.111	-0.139808	0.0462693	0.442606	0.00295964
4	4:86855972	86855972	G	A	0.395	-0.0913206	0.0303362	0.459884	0.00296961
11	11:68807597	68807597	T	C	0.461	0.0950274	0.031683	0.491741	0.00297208
34	34:37056540	37056540	C	T	0.095	0.148959	0.0496148	0.527694	0.00297456
34	34:37063552	37063552	G	A	0.095	0.148959	0.0496148	0.527694	0.00297456
18	18:24551169	24551169	T	C	0.119	-0.129877	0.0428331	0.429892	0.00298218
18	18:24554998	24554998	C	T	0.119	-0.129877	0.0428331	0.429892	0.00298218
10	10:65428714	65428714	C	T	0.433	0.08697	0.0288648	0.451339	0.00298428
14	14:44749845	44749845	G	A	0.103	-0.136285	0.0454459	0.482245	0.00298806
5	5:70033493	70033493	T	C	0.081	-0.152802	0.0507148	0.450959	0.00298813
5	5:53111965	53111965	A	G	0.083	0.157629	0.0522516	0.445602	0.0029901
4	4:86330309	86330309	G	A	0.471	-0.0865491	0.0286266	0.438414	0.00299542
5	5:52758705	52758705	A	C	0.368	-0.0949034	0.0316716	0.513606	0.00299665
11	11:41645662	41645662	G	A	0.082	-0.154165	0.0512107	0.452091	0.00300065
11	11:41682781	41682781	C	T	0.082	-0.154165	0.0512107	0.452091	0.00300065
11	11:41683665	41683665	T	A	0.082	-0.154165	0.0512107	0.452091	0.00300065
11	11:41706852	41706852	T	C	0.082	-0.154165	0.0512107	0.452091	0.00300065
11	11:41711998	41711998	T	G	0.082	-0.154165	0.0512107	0.452091	0.00300065
11	11:41936423	41936423	C	T	0.082	-0.154165	0.0512107	0.452091	0.00300065
11	11:41937274	41937274	A	G	0.082	-0.154165	0.0512107	0.452091	0.00300065
33	33:31017076	31017076	C	G	0.33	-0.0887898	0.0295053	0.454072	0.00300376
34	34:39594780	39594780	A	G	0.389	-0.0912872	0.0304179	0.536835	0.00301264
38	38:1209015	1209015	C	G	0.209	0.108954	0.0363147	0.535408	0.00301689
26	26:11468901	11468901	A	G	0.423	0.0906575	0.0302712	0.522821	0.00302895
26	26:11471213	11471213	A	G	0.423	0.0906575	0.0302712	0.522821	0.00302895
5	5:68893756	68893756	C	G	0.098	-0.144628	0.0478415	0.432637	0.00302967
5	5:26901138	26901138	G	C	0.219	0.107835	0.0359678	0.533795	0.00303001
11	11:42015855	42015855	G	C	0.073	-0.169133	0.0560234	0.436043	0.00303357
5	5:10711521	10711521	C	T	0.136	-0.131794	0.0438954	0.45633	0.00305728
5	5:10718453	10718453	A	C	0.136	-0.131794	0.0438954	0.45633	0.00305728
12	12:46323480	46323480	A	G	0.13	-0.130225	0.0434408	0.54361	0.00306761
11	11:68752324	68752324	G	A	0.461	0.0942775	0.0315458	0.491835	0.00307418
11	11:44964965	44964965	C	T	0.299	0.0981304	0.0327391	0.464288	0.00307438
26	26:32979144	32979144	T	C	0.139	0.125149	0.0419053	0.503956	0.00308638
21	21:19378436	19378436	T	C	0.099	-0.143384	0.0478097	0.456407	0.00309096
2	2:38284019	38284019	A	T	0.166	-0.121958	0.0403482	0.424399	0.00311355
25	25:9132217	9132217	C	T	0.06	0.17859	0.0594716	0.446418	0.00311867
38	38:6547948	6547948	T	G	0.07	-0.172079	0.05752	0.541146	0.00312751
38	38:6548141	6548141	C	T	0.07	-0.172079	0.05752	0.541146	0.00312751
38	38:6590451	6590451	T	C	0.07	-0.172079	0.05752	0.541146	0.00312751
38	38:6592741	6592741	T	G	0.07	-0.172079	0.05752	0.541146	0.00312751
11	11:68774868	68774868	T	C	0.463	0.0942673	0.0316123	0.497582	0.00313252
11	11:42068183	42068183	G	T	0.4	-0.092119	0.0306784	0.445449	0.00314453
18	18:49790635	49790635	G	C	0.37	0.087985	0.0295194	0.490119	0.00315083
33	33:29035891	29035891	C	T	0.149	0.119213	0.0399651	0.474613	0.00316408
5	5:53532940	53532940	A	C	0.321	0.0992561	0.0330625	0.442846	0.00316464
5	5:9940417	9940417	G	A	0.147	-0.127651	0.0425714	0.445597	0.00316581
5	5:9943611	9943611	C	T	0.147	-0.127651	0.0425714	0.445597	0.00316581
10	10:65350096	65350096	A	G	0.433	0.0862542	0.0287856	0.447852	0.00316912
11	11:39643190	39643190	C	T	0.436	-0.0917218	0.0299387	0.391116	0.00317324
10	10:58225552	58225552	A	G	0.179	0.110088	0.0368789	0.468372	0.00317361
16	16:50497539	50497539	C	T	0.395	-0.0900453	0.0298192	0.422951	0.00317843
4	4:86226793	86226793	G	A	0.467	-0.0858007	0.0285748	0.440773	0.00317903
10	10:65493801	65493801	T	A	0.37	-0.0891146	0.0293408	0.404992	0.00317959
11	11:26028151	26028151	T	C	0.303	-0.0968176	0.0312014	0.366357	0.00318627
7	7:79988556	79988556	C	A	0.317	-0.0927326	0.0309922	0.452526	0.00318877
7	7:79990662	79990662	C	A	0.317	-0.0927326	0.0309922	0.452526	0.00318877
11	11:72431938	72431938	G	A	0.393	-0.0926294	0.0311128	0.518866	0.00319147
5	5:1915072	1915072	A	G	0.208	-0.112366	0.0359324	0.352581	0.00320166
5	5:1935374	1935374	G	A	0.208	-0.112366	0.0359324	0.352581	0.00320166
16	16:49399774	49399774	A	G	0.37	-0.0900022	0.0302361	0.482689	0.00320819
16	16:49154875	49154875	T	C	0.393	-0.0884512	0.0297347	0.486481	0.00321932
4	4:87266907	87266907	A	G	0.361	0.0880328	0.0293594	0.439925	0.00321962
26	26:10730798	10730798	C	T	0.477	0.0876087	0.0294547	0.517911	0.00322027
25	25:9140236	9140236	G	A	0.059	0.17992	0.0600711	0.443337	0.0032209
25	25:9151363	9151363	G	A	0.059	0.17992	0.0600711	0.443337	0.0032209
25	25:9151859	9151859	G	A	0.059	0.17992	0.0600711	0.443337	0.0032209
25	25:9152891	9152891	C	A	0.059	0.17992	0.0600711	0.443337	0.0032209
25	25:9161446	9161446	C	T	0.059	0.17992	0.0600711	0.443337	0.0032209
25	25:9166012	9166012	A	G	0.059	0.17992	0.0600711	0.443337	0.0032209
25	25:9170339	9170339	T	C	0.059	0.17992	0.0600711	0.443337	0.0032209
25	25:9183123	9183123	A	G	0.059	0.17992	0.0600711	0.443337	0.0032209
25	25:9188581	9188581	G	A	0.059	0.17992	0.0600711	0.443337	0.0032209
25	25:9292268	9292268	G	C	0.059	0.17992	0.0600711	0.443337	0.0032209
25	25:9295532	9295532	T	G	0.059	0.17992	0.0600711	0.443337	0.0032209
25	25:9344555	9344555	T	C	0.059	0.17992	0.0600711	0.443337	0.0032209
28	28:18098998	18098998	A	G	0.245	0.100102	0.0335346	0.458128	0.00322218
38	38:8840916	8840916	G	A	0.06	-0.183376	0.0612602	0.562267	0.00323215
33	33:2331524	2331524	A	G	0.458	0.0887573	0.0293124	0.408424	0.00323516
5	5:51484585	51484585	C	T	0.126	0.134334	0.0445421	0.41932	0.00323837
5	5:51491290	51491290	T	C	0.126	0.134334	0.0445421	0.41932	0.00323837
4	4:87754396	87754396	C	T	0.462	-0.0868571	0.0292145	0.483013	0.00324185
4	4:85571025	85571025	T	C	0.466	-0.0868473	0.029041	0.447475	0.0032481
4	4:85639224	85639224	T	C	0.466	-0.0868473	0.029041	0.447475	0.0032481
4	4:85642793	85642793	G	A	0.466	-0.0868473	0.029041	0.447475	0.0032481
11	11:38964018	38964018	G	T	0.398	-0.0911291	0.0302952	0.428165	0.00325367
4	4:87642396	87642396	A	C	0.381	-0.0895409	0.0300623	0.464766	0.00325394
4	4:87646346	87646346	T	C	0.381	-0.0895409	0.0300623	0.464766	0.00325394
4	4:86303342	86303342	C	T	0.516	-0.0875765	0.0291964	0.435853	0.00325616
22	22:60794194	60794194	T	C	0.424	-0.0861553	0.0289995	0.484863	0.00325787
5	5:5841434	5841434	T	C	0.208	-0.110993	0.0360169	0.372585	0.00325962
5	5:5894708	5894708	A	T	0.208	-0.110993	0.0360169	0.372585	0.00325962
4	4:87484326	87484326	A	G	0.48	-0.0867071	0.0290691	0.455077	0.0032672
11	11:39320039	39320039	C	T	0.426	-0.0918473	0.0300272	0.388327	0.00327187
4	4:37784182	37784182	A	G	0.235	0.108057	0.0358529	0.418173	0.00327552
7	7:80616577	80616577	G	A	0.292	-0.0958459	0.0321762	0.45996	0.00327655
38	38:15461051	15461051	A	G	0.484	-0.0884034	0.029642	0.452678	0.00327962
11	11:44389152	44389152	A	G	0.478	-0.0921096	0.0309916	0.532331	0.00328089
22	22:37632831	37632831	A	C	0.433	0.0891916	0.0293394	0.396989	0.00328518
10	10:65591246	65591246	T	C	0.356	-0.0901262	0.0298962	0.414662	0.00329072
35	35:12672185	12672185	C	A	0.308	0.0952952	0.0317549	0.427567	0.00330054
21	21:19116677	19116677	A	G	0.089	-0.148562	0.0499595	0.464611	0.00330205
10	10:65554364	65554364	G	A	0.435	0.0858076	0.0288075	0.455029	0.00330235
20	20:5865531	5865531	T	C	0.107	0.138292	0.0455502	0.398077	0.00330781
22	22:60387400	60387400	T	C	0.243	0.100161	0.033633	0.453867	0.00331599
4	4:36128587	36128587	G	C	0.19	0.114353	0.0381187	0.427269	0.00331948
7	7:80621797	80621797	T	C	0.303	-0.0937697	0.0315293	0.460653	0.00332098
7	7:80624811	80624811	G	T	0.303	-0.0937697	0.0315293	0.460653	0.00332098
7	7:80627487	80627487	A	G	0.303	-0.0937697	0.0315293	0.460653	0.00332098
5	5:5410890	5410890	T	C	0.249	-0.100589	0.033163	0.396818	0.00335096
5	5:5416863	5416863	T	G	0.249	-0.100589	0.033163	0.396818	0.00335096
5	5:5436945	5436945	A	G	0.249	-0.100589	0.033163	0.396818	0.00335096
18	18:50335056	50335056	G	A	0.283	0.0957662	0.0321254	0.561996	0.00335218
4	4:87909183	87909183	C	T	0.415	-0.0877657	0.0296419	0.48911	0.0033559
4	4:29077105	29077105	T	G	0.089	0.156801	0.0523524	0.427613	0.00335626
4	4:29079050	29079050	A	G	0.089	0.156801	0.0523524	0.427613	0.00335626
4	4:29079584	29079584	A	T	0.089	0.156801	0.0523524	0.427613	0.00335626
4	4:29079654	29079654	G	A	0.089	0.156801	0.0523524	0.427613	0.00335626
4	4:29080258	29080258	A	G	0.089	0.156801	0.0523524	0.427613	0.00335626
4	4:29086727	29086727	A	G	0.089	0.156801	0.0523524	0.427613	0.00335626
7	7:79978952	79978952	C	T	0.313	-0.092473	0.0310801	0.452848	0.0033588
2	2:45331466	45331466	G	A	0.426	-0.0914687	0.0305867	0.43477	0.00336065
1	1:112560651	112560651	C	G	0.298	-0.0950037	0.0320388	0.534634	0.00336452
16	16:49820620	49820620	C	T	0.382	-0.0891315	0.0300751	0.474524	0.00336905
4	4:38126871	38126871	A	T	0.186	0.117444	0.0390617	0.417229	0.00337171
11	11:39526452	39526452	T	G	0.416	-0.0910066	0.0304061	0.431536	0.00337483
33	33:29050584	29050584	G	A	0.162	0.115726	0.0389905	0.460336	0.00338084
10	10:65586646	65586646	A	G	0.431	0.086581	0.0290538	0.441504	0.0033866
33	33:1670214	1670214	C	T	0.429	0.0889556	0.0292953	0.391822	0.00339222
10	10:65558697	65558697	C	T	0.429	0.0865862	0.0290768	0.443395	0.00339434
10	10:65577988	65577988	C	T	0.429	0.0865862	0.0290768	0.443395	0.00339434
9	9:8143095	8143095	T	C	0.134	0.12697	0.0429495	0.491478	0.00339969
7	7:80117888	80117888	G	C	0.478	0.0854743	0.0288949	0.480509	0.00340454
7	7:80122865	80122865	T	C	0.478	0.0854743	0.0288949	0.480509	0.00340454
20	20:7159862	7159862	G	A	0.466	-0.0903983	0.0302835	0.434346	0.00340648
11	11:43809165	43809165	A	G	0.423	0.0899802	0.0301925	0.441499	0.00341635
11	11:43874055	43874055	T	A	0.423	0.0899802	0.0301925	0.441499	0.00341635
11	11:44018307	44018307	A	G	0.423	0.0899802	0.0301925	0.441499	0.00341635
11	11:44019128	44019128	C	T	0.423	0.0899802	0.0301925	0.441499	0.00341635
2	2:40750491	40750491	T	C	0.304	-0.100402	0.0336638	0.435897	0.00341957
11	11:41037458	41037458	A	C	0.047	-0.207649	0.0689312	0.4065	0.00342517
11	11:41539442	41539442	G	A	0.047	-0.207649	0.0689312	0.4065	0.00342517
11	11:41567104	41567104	A	C	0.047	-0.207649	0.0689312	0.4065	0.00342517
11	11:41667625	41667625	C	T	0.047	-0.207649	0.0689312	0.4065	0.00342517
11	11:41686881	41686881	T	G	0.047	-0.207649	0.0689312	0.4065	0.00342517
11	11:41703312	41703312	T	G	0.047	-0.207649	0.0689312	0.4065	0.00342517
4	4:35492727	35492727	T	C	0.211	0.108967	0.0364561	0.428464	0.00342759
4	4:35522725	35522725	T	C	0.211	0.108967	0.0364561	0.428464	0.00342759
4	4:35554813	35554813	T	C	0.211	0.108967	0.0364561	0.428464	0.00342759
4	4:35564350	35564350	A	G	0.211	0.108967	0.0364561	0.428464	0.00342759
36	36:27989411	27989411	C	T	0.427	-0.0872347	0.0295024	0.475828	0.0034303
4	4:35474275	35474275	T	C	0.207	0.109467	0.0366023	0.426422	0.00343098
4	4:35482165	35482165	G	C	0.207	0.109467	0.0366023	0.426422	0.00343098
22	22:37906219	37906219	G	A	0.408	0.0911358	0.0296309	0.366713	0.00344357
4	4:37277220	37277220	C	T	0.24	0.105066	0.0353867	0.449282	0.00344806
4	4:37285293	37285293	G	C	0.24	0.105066	0.0353867	0.449282	0.00344806
4	4:36940129	36940129	G	A	0.228	0.107975	0.0362993	0.441203	0.00345423
4	4:36944650	36944650	G	A	0.228	0.107975	0.0362993	0.441203	0.00345423
11	11:39417646	39417646	G	A	0.284	0.0972766	0.0328428	0.461436	0.00345492
11	11:39420517	39420517	G	A	0.284	0.0972766	0.0328428	0.461436	0.00345492
11	11:39422703	39422703	G	T	0.284	0.0972766	0.0328428	0.461436	0.00345492
38	38:761157	761157	C	T	0.286	0.0948365	0.0321002	0.477339	0.00345575
38	38:3809083	3809083	A	C	0.353	0.0884716	0.0298964	0.464288	0.00346028
11	11:44193741	44193741	G	A	0.492	0.0919933	0.0311339	0.532635	0.00346485
26	26:11478902	11478902	T	C	0.424	0.0894622	0.0303166	0.523562	0.00347847
16	16:49026299	49026299	G	A	0.41	-0.0868747	0.0294601	0.486509	0.00349
7	7:80760638	80760638	C	T	0.147	-0.11585	0.0392249	0.468448	0.00349901
5	5:70239472	70239472	C	A	0.062	-0.17192	0.0580144	0.44983	0.0035009
5	5:70359082	70359082	A	G	0.062	-0.17192	0.0580144	0.44983	0.0035009
33	33:2362546	2362546	T	G	0.456	0.0884858	0.0294112	0.404228	0.00350168
5	5:5747200	5747200	G	A	0.216	-0.10772	0.0352523	0.373972	0.0035161
5	5:5757220	5757220	T	C	0.216	-0.10772	0.0352523	0.373972	0.0035161
5	5:5759814	5759814	C	T	0.216	-0.10772	0.0352523	0.373972	0.0035161
5	5:5773836	5773836	G	C	0.216	-0.10772	0.0352523	0.373972	0.0035161
22	22:37860947	37860947	G	A	0.408	0.0915057	0.0297223	0.362023	0.00351612
22	22:37864393	37864393	T	C	0.408	0.0915057	0.0297223	0.362023	0.00351612
1	1:93517820	93517820	A	T	0.444	0.088537	0.0298532	0.445102	0.00352138
25	25:47109064	47109064	G	A	0.145	0.121346	0.0412163	0.497711	0.00352477
25	25:47121530	47121530	G	A	0.145	0.121346	0.0412163	0.497711	0.00352477
25	25:47121789	47121789	C	T	0.145	0.121346	0.0412163	0.497711	0.00352477
25	25:47141688	47141688	G	A	0.145	0.121346	0.0412163	0.497711	0.00352477
25	25:47143970	47143970	T	C	0.145	0.121346	0.0412163	0.497711	0.00352477
5	5:17771696	17771696	T	C	0.31	0.0926719	0.0312424	0.443597	0.00352674
12	12:45381312	45381312	T	G	0.132	-0.126225	0.0428119	0.530895	0.00352731
22	22:137582	137582	T	C	0.259	-0.100006	0.0337676	0.449039	0.00352817
22	22:179292	179292	G	A	0.259	-0.100006	0.0337676	0.449039	0.00352817
22	22:191461	191461	C	T	0.259	-0.100006	0.0337676	0.449039	0.00352817
1	1:99594273	99594273	A	G	0.141	-0.120578	0.0409468	0.487503	0.00353298
38	38:4211152	4211152	G	A	0.508	-0.0844679	0.0282679	0.418291	0.00353471
36	36:27201217	27201217	G	A	0.187	-0.109894	0.0367421	0.414757	0.0035351
11	11:68737278	68737278	A	G	0.462	0.0928246	0.0315372	0.494633	0.00353847
21	21:47880807	47880807	G	A	0.463	-0.0860495	0.029095	0.454627	0.00353959
16	16:50516952	50516952	G	A	0.387	-0.0901332	0.0303589	0.439833	0.00353979
33	33:29062299	29062299	G	A	0.116	0.130261	0.0441119	0.458127	0.00355909
35	35:24555784	24555784	T	C	0.382	-0.086902	0.0294824	0.469999	0.00355963
35	35:24556402	24556402	G	C	0.382	-0.086902	0.0294824	0.469999	0.00355963
18	18:50689370	50689370	T	C	0.215	0.104262	0.0354184	0.4789	0.00356118
26	26:33082304	33082304	C	T	0.138	0.123782	0.0421041	0.500396	0.00357037
26	26:33114579	33114579	G	T	0.138	0.123782	0.0421041	0.500396	0.00357037
5	5:18549296	18549296	T	C	0.253	0.100979	0.0340502	0.438719	0.00357246
33	33:1333177	1333177	A	G	0.429	0.0881622	0.0291816	0.391127	0.00357577
33	33:1343759	1343759	T	C	0.429	0.0881622	0.0291816	0.391127	0.00357577
5	5:806369	806369	C	A	0.209	-0.110135	0.0356499	0.35469	0.00357598
4	4:86859355	86859355	C	T	0.394	-0.0894898	0.0303227	0.459635	0.0035775
4	4:86881811	86881811	A	G	0.394	-0.0894898	0.0303227	0.459635	0.0035775
2	2:45577380	45577380	A	G	0.414	-0.0908244	0.0305483	0.432233	0.00357786
4	4:36790787	36790787	G	A	0.226	0.10742	0.0362606	0.442312	0.00357819
10	10:65483459	65483459	T	C	0.429	0.0855691	0.0288968	0.442723	0.00358301
10	10:65485491	65485491	C	A	0.429	0.0855691	0.0288968	0.442723	0.00358301
11	11:68721800	68721800	A	G	0.465	0.092781	0.0315514	0.484657	0.00358842
5	5:5941076	5941076	G	C	0.271	-0.0964659	0.0320083	0.394398	0.00359446
20	20:6750778	6750778	T	C	0.481	-0.0881875	0.0298135	0.446025	0.00359773
11	11:73015861	73015861	C	T	0.06	-0.181466	0.061572	0.462151	0.00359941
34	34:38733941	38733941	C	A	0.356	-0.0886588	0.0301597	0.524695	0.00360731
1	1:94810846	94810846	A	C	0.184	-0.110263	0.0372622	0.441261	0.00362653
12	12:46281355	46281355	T	C	0.132	-0.126883	0.0431362	0.537883	0.0036329
5	5:2724273	2724273	G	A	0.121	-0.138673	0.0442993	0.332636	0.00363993
11	11:41517828	41517828	G	A	0.113	-0.134024	0.0444633	0.390677	0.00364117
38	38:1496567	1496567	A	G	0.471	0.0848982	0.0285185	0.420304	0.00364332
25	25:47165115	47165115	T	C	0.147	0.119914	0.0408878	0.498422	0.0036514
7	7:13998225	13998225	T	C	0.103	-0.141445	0.0476184	0.426139	0.00365402
7	7:14054015	14054015	G	A	0.103	-0.141445	0.0476184	0.426139	0.00365402
11	11:39888383	39888383	G	A	0.425	-0.0917425	0.0301536	0.378117	0.00365763
2	2:38396371	38396371	C	T	0.147	-0.126837	0.0428315	0.435361	0.00365785
1	1:95722396	95722396	G	C	0.168	-0.117027	0.0396201	0.444408	0.00365953
1	1:95646269	95646269	G	A	0.169	-0.116473	0.0394944	0.449906	0.00366661
34	34:36324347	36324347	T	A	0.099	-0.140589	0.0479257	0.482274	0.00367062
7	7:80729198	80729198	C	T	0.361	-0.0895969	0.0305466	0.483391	0.00367125
4	4:86865214	86865214	C	T	0.389	-0.0901244	0.0306734	0.469037	0.00367194
4	4:86866165	86866165	T	C	0.389	-0.0901244	0.0306734	0.469037	0.00367194
4	4:86871774	86871774	C	T	0.389	-0.0901244	0.0306734	0.469037	0.00367194
5	5:68206551	68206551	C	T	0.141	-0.120157	0.0406696	0.441672	0.00367269
5	5:68248207	68248207	C	T	0.141	-0.120157	0.0406696	0.441672	0.00367269
5	5:68250296	68250296	G	A	0.141	-0.120157	0.0406696	0.441672	0.00367269
7	7:77603993	77603993	A	C	0.147	-0.116006	0.0395041	0.468808	0.00369217
7	7:77665343	77665343	G	A	0.147	-0.116006	0.0395041	0.468808	0.00369217
19	19:45580143	45580143	C	T	0.331	0.0905222	0.0307795	0.458266	0.00369568
10	10:65505751	65505751	T	G	0.368	-0.0875102	0.0295403	0.428634	0.00370159
5	5:2692181	2692181	C	G	0.121	-0.138562	0.0443199	0.33213	0.00370231
10	10:65605781	65605781	C	T	0.44	0.0856849	0.0290316	0.441598	0.00370362
33	33:1832031	1832031	A	G	0.23	0.0986537	0.0335287	0.452394	0.00372101
33	33:1842119	1842119	A	G	0.23	0.0986537	0.0335287	0.452394	0.00372101
11	11:39157645	39157645	T	C	0.397	-0.0899906	0.0303527	0.428546	0.00372435
36	36:27238312	27238312	A	G	0.186	-0.109922	0.0368509	0.406774	0.00373763
26	26:32628811	32628811	C	T	0.438	0.0869779	0.0291116	0.404321	0.00373908
5	5:68529146	68529146	T	G	0.064	-0.168978	0.0573205	0.442042	0.00374222
16	16:50504512	50504512	T	C	0.359	0.0903076	0.0298725	0.382429	0.00374282
2	2:41933423	41933423	C	T	0.324	-0.097627	0.0328333	0.41715	0.0037441
4	4:86205765	86205765	A	C	0.257	-0.0968352	0.0328439	0.443309	0.00374789
11	11:39524339	39524339	G	T	0.073	-0.163924	0.0538497	0.366755	0.00375306
11	11:39531676	39531676	G	A	0.073	-0.163924	0.0538497	0.366755	0.00375306
11	11:39545969	39545969	G	A	0.073	-0.163924	0.0538497	0.366755	0.00375306
11	11:39554365	39554365	C	G	0.073	-0.163924	0.0538497	0.366755	0.00375306
11	11:39753472	39753472	A	G	0.073	-0.163924	0.0538497	0.366755	0.00375306
1	1:105378977	105378977	A	G	0.094	-0.145913	0.0499084	0.504912	0.00375603
1	1:62120938	62120938	A	G	0.15	-0.121538	0.0415491	0.483185	0.0037645
1	1:62126420	62126420	A	G	0.15	-0.121538	0.0415491	0.483185	0.0037645
5	5:51116443	51116443	T	C	0.212	0.108976	0.0359514	0.375926	0.00378806
11	11:72695970	72695970	T	C	0.346	0.0933171	0.0317331	0.445876	0.00379701
11	11:41209597	41209597	G	A	0.443	-0.0902361	0.0298707	0.383164	0.00379764
23	23:49111092	49111092	G	T	0.421	0.0835325	0.0284545	0.451343	0.00379799
23	23:49733799	49733799	T	C	0.406	0.086379	0.0294	0.44768	0.00379951
9	9:47163883	47163883	T	A	0.129	0.128472	0.0438853	0.54057	0.00381643
23	23:51856442	51856442	A	G	0.395	0.0842374	0.0287493	0.457976	0.00381992
26	26:10697778	10697778	T	C	0.424	0.0887249	0.0304032	0.507796	0.00382023
33	33:28778809	28778809	A	C	0.382	0.0896393	0.0306719	0.473146	0.00382955
33	33:28789914	28789914	A	G	0.382	0.0896393	0.0306719	0.473146	0.00382955
38	38:2277767	2277767	T	C	0.326	-0.090044	0.0304178	0.421016	0.00384117
34	34:38913358	38913358	A	G	0.314	-0.0890298	0.0305485	0.504466	0.00386493
39	39:87321108	87321108	T	C	0.385	-0.0706997	0.0242429	0.48384	0.00386568
4	4:86557715	86557715	C	T	0.382	-0.0879232	0.0300417	0.458105	0.00386831
11	11:45006227	45006227	T	C	0.301	0.0946238	0.0323825	0.4674	0.00387167
27	27:24110135	24110135	C	A	0.1	0.142406	0.0486994	0.460679	0.00387362
11	11:44044557	44044557	A	T	0.454	0.0894099	0.0306355	0.476188	0.00387573
2	2:37180006	37180006	T	C	0.234	-0.103482	0.0350302	0.424854	0.00387997
18	18:20142671	20142671	C	T	0.144	-0.119963	0.0407123	0.432222	0.003881
11	11:40330585	40330585	G	A	0.091	-0.144849	0.0486704	0.402297	0.00388703
11	11:39603703	39603703	C	G	0.091	-0.144988	0.0487214	0.401934	0.00389744
11	11:39751319	39751319	A	G	0.091	-0.144988	0.0487214	0.401934	0.00389744
11	11:39754352	39754352	C	T	0.091	-0.144988	0.0487214	0.401934	0.00389744
10	10:58034176	58034176	T	G	0.18	0.107756	0.0368993	0.466361	0.0038978
10	10:58077829	58077829	T	C	0.18	0.107756	0.0368993	0.466361	0.0038978
11	11:25128986	25128986	C	T	0.339	-0.0914369	0.0300039	0.362377	0.00389828
34	34:36549239	36549239	T	C	0.1	-0.138705	0.0476243	0.486961	0.00390412
7	7:77633286	77633286	C	T	0.149	-0.113514	0.0388631	0.46324	0.00390941
1	1:31294037	31294037	A	G	0.053	-0.187035	0.063661	0.570544	0.00391565
7	7:79971490	79971490	A	G	0.33	-0.0890681	0.0304473	0.454236	0.00391591
4	4:87264695	87264695	A	G	0.365	0.0851929	0.0290866	0.448403	0.00391946
10	10:58205260	58205260	C	T	0.18	0.107539	0.0368533	0.46699	0.0039208
10	10:58207350	58207350	T	G	0.18	0.107539	0.0368533	0.46699	0.0039208
11	11:72195890	72195890	T	C	0.325	-0.0965081	0.0327001	0.590706	0.00392119
2	2:39516476	39516476	A	C	0.071	-0.165415	0.0567605	0.470611	0.0039362
2	2:39522240	39522240	T	C	0.071	-0.165415	0.0567605	0.470611	0.0039362
2	2:39549618	39549618	G	A	0.071	-0.165415	0.0567605	0.470611	0.0039362
2	2:39551653	39551653	A	G	0.071	-0.165415	0.0567605	0.470611	0.0039362
2	2:39555768	39555768	C	T	0.071	-0.165415	0.0567605	0.470611	0.0039362
2	2:39571308	39571308	G	T	0.071	-0.165415	0.0567605	0.470611	0.0039362
22	22:40700379	40700379	C	T	0.389	0.0882261	0.0303431	0.500815	0.00394634
21	21:20052875	20052875	T	C	0.393	0.088523	0.030339	0.46307	0.00394759
16	16:49227338	49227338	A	T	0.362	-0.0882249	0.030292	0.47471	0.00394781
13	13:21857759	21857759	A	G	0.121	0.131676	0.0448033	0.431985	0.00394802
5	5:69532661	69532661	A	G	0.063	-0.167454	0.0570515	0.436662	0.00394925
5	5:69534796	69534796	T	C	0.063	-0.167454	0.0570515	0.436662	0.00394925
5	5:69541626	69541626	A	C	0.063	-0.167454	0.0570515	0.436662	0.00394925
5	5:69733363	69733363	T	C	0.063	-0.167454	0.0570515	0.436662	0.00394925
5	5:69750298	69750298	G	A	0.063	-0.167454	0.0570515	0.436662	0.00394925
5	5:69756424	69756424	G	A	0.063	-0.167454	0.0570515	0.436662	0.00394925
5	5:69766119	69766119	A	C	0.063	-0.167454	0.0570515	0.436662	0.00394925
5	5:69796278	69796278	C	T	0.063	-0.167454	0.0570515	0.436662	0.00394925
5	5:69811451	69811451	C	T	0.063	-0.167454	0.0570515	0.436662	0.00394925
5	5:69841686	69841686	A	G	0.063	-0.167454	0.0570515	0.436662	0.00394925
5	5:69843998	69843998	G	A	0.063	-0.167454	0.0570515	0.436662	0.00394925
5	5:5854850	5854850	A	G	0.22	-0.106761	0.0350605	0.360773	0.00395774
5	5:10147554	10147554	G	A	0.143	-0.125828	0.0428736	0.435545	0.00396516
5	5:10147747	10147747	G	A	0.143	-0.125828	0.0428736	0.435545	0.00396516
11	11:68765081	68765081	T	C	0.46	0.0919526	0.0316251	0.487681	0.00396682
11	11:39466011	39466011	C	T	0.43	-0.0903845	0.0308012	0.438694	0.00397258
2	2:41961268	41961268	A	G	0.34	-0.0960913	0.0322369	0.39726	0.00397374
21	21:19205303	19205303	A	G	0.1	-0.138914	0.0476399	0.459936	0.00398153
38	38:9514974	9514974	T	C	0.06	-0.18257	0.0624283	0.559339	0.00398564
34	34:39593028	39593028	T	G	0.39	-0.0882927	0.0303492	0.532061	0.00399193
26	26:32673810	32673810	T	G	0.438	0.0863314	0.0290552	0.400747	0.00400452
26	26:32675707	32675707	A	G	0.438	0.0863314	0.0290552	0.400747	0.00400452
33	33:1377042	1377042	T	C	0.445	0.0872918	0.0292991	0.394668	0.00401353
4	4:86449303	86449303	T	C	0.45	0.0861694	0.0294596	0.445122	0.00401592
33	33:1307709	1307709	A	G	0.23	0.0977763	0.0334873	0.447423	0.00403399
38	38:2486804	2486804	T	C	0.345	-0.0894245	0.0299023	0.386148	0.00404021
38	38:2488963	2488963	T	C	0.345	-0.0894245	0.0299023	0.386148	0.00404021
16	16:49045065	49045065	G	A	0.407	-0.0859124	0.0296212	0.490441	0.00404727
11	11:39611360	39611360	C	T	0.054	-0.181469	0.0620039	0.436276	0.00404755
11	11:39713871	39713871	C	T	0.054	-0.181469	0.0620039	0.436276	0.00404755
11	11:39923606	39923606	G	A	0.054	-0.181469	0.0620039	0.436276	0.00404755
11	11:40041263	40041263	C	T	0.054	-0.181469	0.0620039	0.436276	0.00404755
11	11:40110464	40110464	G	T	0.054	-0.181469	0.0620039	0.436276	0.00404755
7	7:79992678	79992678	G	T	0.303	-0.0908006	0.0311564	0.454332	0.00405217
33	33:2201159	2201159	T	C	0.459	0.0867541	0.0293856	0.412087	0.00405454
22	22:60755128	60755128	T	G	0.254	0.095497	0.0326081	0.434146	0.00405459
18	18:11262991	11262991	G	A	0.085	-0.150525	0.0510545	0.416011	0.00405944
11	11:41659729	41659729	T	C	0.422	-0.0902044	0.0301288	0.385369	0.00408773
11	11:41663977	41663977	T	C	0.422	-0.0902044	0.0301288	0.385369	0.00408773
11	11:41665312	41665312	C	T	0.422	-0.0902044	0.0301288	0.385369	0.00408773
11	11:41675274	41675274	T	C	0.422	-0.0902044	0.0301288	0.385369	0.00408773
18	18:50777440	50777440	T	G	0.203	0.103552	0.0357513	0.489839	0.00409469
7	7:80753200	80753200	T	C	0.375	-0.0872623	0.0301014	0.478679	0.00409615
24	24:47340318	47340318	T	C	0.468	-0.0823465	0.0282255	0.442487	0.0041046
5	5:69340465	69340465	T	C	0.08	-0.148027	0.0507847	0.446122	0.00410838
4	4:85574719	85574719	A	G	0.522	-0.0871554	0.0298556	0.442724	0.00411158
7	7:80709683	80709683	T	C	0.163	-0.108008	0.0371345	0.455025	0.00411391
18	18:20886327	20886327	T	G	0.084	-0.149882	0.0515022	0.452874	0.00411785
5	5:5895574	5895574	G	A	0.245	-0.102378	0.0342262	0.382686	0.00412828
5	5:5899953	5899953	C	T	0.245	-0.102378	0.0342262	0.382686	0.00412828
1	1:95303803	95303803	A	G	0.167	-0.116034	0.0398188	0.445642	0.00412857
33	33:28845064	28845064	T	C	0.348	0.0892595	0.0307785	0.467113	0.00413629
33	33:28912292	28912292	G	A	0.348	0.0892595	0.0307785	0.467113	0.00413629
11	11:39529296	39529296	T	C	0.415	-0.0889751	0.0303763	0.43056	0.00413677
5	5:68281188	68281188	G	A	0.147	-0.117552	0.0405498	0.469694	0.00413731
5	5:68281567	68281567	A	G	0.147	-0.117552	0.0405498	0.469694	0.00413731
20	20:49426203	49426203	T	C	0.317	-0.0927685	0.0318708	0.447466	0.00413906
22	22:38541304	38541304	C	T	0.27	0.0982098	0.0337897	0.454197	0.00415204
38	38:745580	745580	C	T	0.274	0.0929267	0.0321373	0.492399	0.00415462
33	33:629663	629663	G	A	0.461	0.0867587	0.0294602	0.411163	0.00416149
26	26:32582725	32582725	A	G	0.433	0.0866156	0.0293073	0.402492	0.00417628
2	2:44169589	44169589	C	T	0.328	-0.0969043	0.0325669	0.390476	0.00417656
33	33:1543733	1543733	T	C	0.462	0.0864107	0.0293354	0.40959	0.00417899
1	1:93509044	93509044	T	C	0.444	0.0870479	0.0299142	0.44596	0.00418218
1	1:93512419	93512419	T	C	0.444	0.0870479	0.0299142	0.44596	0.00418218
1	1:93535420	93535420	A	C	0.444	0.0870479	0.0299142	0.44596	0.00418218
1	1:93561590	93561590	A	C	0.444	0.0870479	0.0299142	0.44596	0.00418218
1	1:93568856	93568856	A	G	0.444	0.0870479	0.0299142	0.44596	0.00418218
5	5:68600480	68600480	A	G	0.08	-0.154472	0.052752	0.42466	0.00418482
5	5:27444155	27444155	A	G	0.185	0.109553	0.0379322	0.501747	0.00419005
38	38:682622	682622	C	T	0.216	0.102824	0.0355181	0.536135	0.00419394
18	18:49318096	49318096	T	C	0.177	0.108643	0.0376008	0.517625	0.00419419
18	18:49363199	49363199	A	C	0.177	0.108643	0.0376008	0.517625	0.00419419
33	33:29028309	29028309	C	T	0.148	0.116519	0.0402773	0.470544	0.00420595
4	4:84525217	84525217	C	T	0.426	-0.0846452	0.0291202	0.447931	0.00420896
4	4:84527396	84527396	C	T	0.426	-0.0846452	0.0291202	0.447931	0.00420896
5	5:10715337	10715337	A	G	0.137	-0.126998	0.043809	0.458184	0.00421043
26	26:32514462	32514462	T	C	0.432	0.0862131	0.0292579	0.406852	0.00421412
38	38:4411710	4411710	A	G	0.507	-0.082764	0.0282389	0.419289	0.00421618
5	5:15616355	15616355	C	T	0.111	0.13681	0.0473018	0.471144	0.00421669
39	39:80892357	80892357	G	A	0.073	-0.125451	0.0431301	0.442429	0.00421842
38	38:1204462	1204462	G	A	0.485	0.0839944	0.0291076	0.498649	0.00422323
9	9:8357844	8357844	G	T	0.124	0.129682	0.0449491	0.495324	0.00423173
22	22:11851601	11851601	A	G	0.085	-0.144274	0.0498912	0.465451	0.00424346
2	2:79639892	79639892	T	A	0.35	-0.0889694	0.0308328	0.48434	0.00425441
4	4:28984793	28984793	C	T	0.09	0.15053	0.0514373	0.420428	0.00426041
16	16:49543877	49543877	A	G	0.485	0.0834081	0.0287355	0.446533	0.0042616
4	4:86339147	86339147	G	A	0.516	-0.0854698	0.0293604	0.438396	0.00426397
5	5:37161730	37161730	C	T	0.462	0.0905891	0.0305894	0.393091	0.00427609
5	5:37164762	37164762	A	G	0.462	0.0905891	0.0305894	0.393091	0.00427609
5	5:37173526	37173526	G	A	0.462	0.0905891	0.0305894	0.393091	0.00427609
4	4:84751616	84751616	T	G	0.456	-0.0849669	0.0294274	0.471991	0.00428317
4	4:84753711	84753711	C	T	0.456	-0.0849669	0.0294274	0.471991	0.00428317
4	4:86955745	86955745	C	T	0.388	-0.0870075	0.0300928	0.462611	0.0042869
4	4:86957793	86957793	C	T	0.388	-0.0870075	0.0300928	0.462611	0.0042869
1	1:99365094	99365094	T	C	0.14	-0.118112	0.0409813	0.487475	0.00428772
1	1:99614470	99614470	A	G	0.14	-0.118112	0.0409813	0.487475	0.00428772
38	38:1190454	1190454	C	T	0.42	-0.0842928	0.0292052	0.471226	0.0042965
33	33:1365250	1365250	G	A	0.461	0.0857651	0.0292568	0.413329	0.0043046
4	4:86576098	86576098	C	T	0.389	-0.0871553	0.0301188	0.454249	0.00431387
7	7:14057842	14057842	C	T	0.102	-0.139164	0.0477996	0.431627	0.00431774
35	35:12649993	12649993	A	C	0.307	0.0930713	0.0318842	0.423265	0.00432815
4	4:35441184	35441184	T	C	0.206	0.107422	0.0368424	0.427121	0.00432874
4	4:86337020	86337020	G	A	0.26	-0.0955278	0.0329016	0.441252	0.00433282
7	7:13725608	13725608	C	T	0.102	-0.139068	0.0477784	0.431185	0.00433305
19	19:45401380	45401380	G	A	0.401	-0.0848355	0.0292411	0.441833	0.00433491
8	8:59101844	59101844	A	G	0.068	-0.167855	0.0583422	0.497744	0.00433529
8	8:19074079	19074079	G	A	0.271	0.0971853	0.0335315	0.444667	0.00434516
22	22:60725183	60725183	A	G	0.285	0.0910596	0.0315984	0.472247	0.00434623
35	35:24549409	24549409	C	T	0.371	-0.0852239	0.0295573	0.469192	0.00434647
24	24:47338109	47338109	A	G	0.466	-0.0813169	0.0281137	0.449974	0.00435787
1	1:94574133	94574133	C	G	0.34	0.0912893	0.0315289	0.447645	0.00436116
35	35:24511760	24511760	T	C	0.383	-0.0850533	0.0294728	0.461656	0.00436472
38	38:8729394	8729394	T	C	0.078	-0.159278	0.0546922	0.581248	0.00436578
7	7:77722935	77722935	G	C	0.147	-0.112933	0.0391432	0.46204	0.00437312
22	22:37878687	37878687	C	T	0.408	0.089261	0.0296617	0.362694	0.00437765
26	26:8012499	8012499	T	C	0.392	0.0907288	0.0315366	0.526619	0.00438132
24	24:47245799	47245799	C	T	0.493	-0.0812391	0.0281661	0.460097	0.00438383
25	25:8674950	8674950	T	C	0.058	0.174871	0.0604651	0.448886	0.00438409
25	25:8701993	8701993	G	A	0.058	0.174871	0.0604651	0.448886	0.00438409
25	25:8711457	8711457	G	T	0.058	0.174871	0.0604651	0.448886	0.00438409
25	25:8721392	8721392	T	G	0.058	0.174871	0.0604651	0.448886	0.00438409
25	25:8731165	8731165	C	T	0.058	0.174871	0.0604651	0.448886	0.00438409
25	25:8757522	8757522	T	A	0.058	0.174871	0.0604651	0.448886	0.00438409
25	25:9011657	9011657	G	A	0.058	0.174871	0.0604651	0.448886	0.00438409
25	25:9066576	9066576	A	G	0.058	0.174871	0.0604651	0.448886	0.00438409
25	25:9071351	9071351	A	G	0.058	0.174871	0.0604651	0.448886	0.00438409
25	25:9074426	9074426	A	C	0.058	0.174871	0.0604651	0.448886	0.00438409
25	25:9091421	9091421	C	T	0.058	0.174871	0.0604651	0.448886	0.00438409
25	25:9099070	9099070	A	G	0.058	0.174871	0.0604651	0.448886	0.00438409
25	25:9119224	9119224	C	A	0.058	0.174871	0.0604651	0.448886	0.00438409
10	10:57238176	57238176	G	A	0.181	0.106063	0.036829	0.470526	0.00438817
4	4:27656337	27656337	G	A	0.067	0.165876	0.0570285	0.427623	0.0043954
4	4:27669062	27669062	G	A	0.067	0.165876	0.0570285	0.427623	0.0043954
1	1:113102977	113102977	T	C	0.132	0.126172	0.0432304	0.419639	0.00440288
1	1:113267236	113267236	T	C	0.132	0.126172	0.0432304	0.419639	0.00440288
39	39:88025352	88025352	T	C	0.473	-0.0678404	0.0236106	0.517922	0.00440729
16	16:49641136	49641136	A	G	0.375	-0.0867821	0.0301635	0.473931	0.00440751
5	5:53646192	53646192	T	C	0.118	0.130689	0.0454184	0.470939	0.00441039
5	5:53649988	53649988	T	C	0.118	0.130689	0.0454184	0.470939	0.00441039
7	7:80475227	80475227	G	A	0.309	-0.0902013	0.0313291	0.46703	0.00441389
33	33:28887961	28887961	G	T	0.382	0.0882841	0.0306974	0.47353	0.00441811
33	33:28892198	28892198	T	C	0.382	0.0882841	0.0306974	0.47353	0.00441811
33	33:1840926	1840926	T	C	0.23	0.0962447	0.0333751	0.456642	0.00442409
39	39:87461300	87461300	A	G	0.436	-0.0690877	0.0240661	0.510114	0.00442495
11	11:43809265	43809265	A	G	0.422	0.0873034	0.0301307	0.440636	0.0044305
24	24:47244095	47244095	G	A	0.495	-0.0814699	0.0282311	0.450737	0.00444185
4	4:35456579	35456579	A	G	0.206	0.107169	0.0368285	0.424379	0.00444779
4	4:35468959	35468959	T	C	0.206	0.107169	0.0368285	0.424379	0.00444779
4	4:35471274	35471274	T	C	0.206	0.107169	0.0368285	0.424379	0.00444779
1	1:93580346	93580346	A	C	0.444	0.0865153	0.0298962	0.441062	0.00444816
5	5:2747868	2747868	T	C	0.129	-0.131156	0.0429218	0.338403	0.00444836
11	11:39561334	39561334	T	C	0.128	-0.11947	0.0414874	0.459011	0.0044541
36	36:27227904	27227904	T	C	0.185	-0.107865	0.0368846	0.408842	0.00445504
4	4:27876773	27876773	C	T	0.065	0.167473	0.0576574	0.427184	0.00445714
4	4:28019727	28019727	A	G	0.065	0.167473	0.0576574	0.427184	0.00445714
4	4:28285815	28285815	T	C	0.065	0.167473	0.0576574	0.427184	0.00445714
32	32:879951	879951	G	T	0.186	0.111089	0.0387029	0.480922	0.00446407
7	7:79886516	79886516	G	A	0.472	0.0838322	0.0291727	0.471161	0.00446609
33	33:29050557	29050557	T	C	0.117	0.126713	0.044041	0.461954	0.00447023
33	33:29051071	29051071	T	C	0.117	0.126713	0.044041	0.461954	0.00447023
2	2:45539580	45539580	A	G	0.205	0.106818	0.0372646	0.499071	0.00447851
2	2:45543562	45543562	A	G	0.205	0.106818	0.0372646	0.499071	0.00447851
2	2:45773503	45773503	A	G	0.205	0.106818	0.0372646	0.499071	0.00447851
11	11:34067046	34067046	G	A	0.047	-0.19852	0.0679312	0.409623	0.00448679
25	25:47394315	47394315	T	C	0.131	0.124942	0.0435676	0.521677	0.00449298
8	8:65898717	65898717	A	G	0.27	0.0954829	0.0331949	0.459101	0.0044952
8	8:65913926	65913926	T	C	0.27	0.0954829	0.0331949	0.459101	0.0044952
22	22:60355467	60355467	G	A	0.209	0.104825	0.0361594	0.42975	0.00450174
10	10:57745524	57745524	G	A	0.179	0.106016	0.03694	0.474115	0.00450343
25	25:9183356	9183356	G	A	0.06	0.17234	0.0597898	0.448612	0.00451809
1	1:93810636	93810636	A	G	0.209	-0.102655	0.0357666	0.469919	0.00452246
1	1:93837317	93837317	G	C	0.209	-0.102655	0.0357666	0.469919	0.00452246
1	1:93843434	93843434	A	G	0.209	-0.102655	0.0357666	0.469919	0.00452246
1	1:93870587	93870587	A	G	0.209	-0.102655	0.0357666	0.469919	0.00452246
1	1:93889868	93889868	C	T	0.209	-0.102655	0.0357666	0.469919	0.00452246
5	5:51434151	51434151	T	C	0.125	0.129877	0.0446323	0.418756	0.00452677
6	6:76661247	76661247	T	C	0.352	0.0841799	0.0292582	0.454548	0.00452753
34	34:39344570	39344570	A	G	0.358	-0.0863929	0.0301194	0.534268	0.00453599
4	4:86213600	86213600	C	T	0.473	-0.0825352	0.0286075	0.444479	0.00454005
4	4:86215968	86215968	A	C	0.473	-0.0825352	0.0286075	0.444479	0.00454005
7	7:13926454	13926454	C	G	0.102	-0.138356	0.0477184	0.427248	0.0045421
4	4:87708264	87708264	G	A	0.466	-0.0835138	0.0291187	0.469846	0.00454928
33	33:30919768	30919768	C	T	0.247	-0.0919217	0.0321011	0.480078	0.00455838
38	38:8086573	8086573	C	T	0.061	-0.175748	0.0609172	0.565184	0.00456029
38	38:8107286	8107286	A	T	0.061	-0.175748	0.0609172	0.565184	0.00456029
38	38:8482850	8482850	A	T	0.061	-0.175748	0.0609172	0.565184	0.00456029
33	33:28845775	28845775	A	G	0.349	0.0882878	0.0307999	0.471133	0.00456034
35	35:11350709	11350709	T	C	0.359	0.0909699	0.0316925	0.462678	0.00456201
22	22:60727021	60727021	T	C	0.236	0.097667	0.0337358	0.429445	0.00456277
22	22:60485434	60485434	A	C	0.228	0.0982337	0.0341821	0.455053	0.00457128
11	11:44160321	44160321	T	C	0.336	0.0911755	0.0316441	0.447456	0.00457253
8	8:68240657	68240657	T	C	0.448	0.0827746	0.0287058	0.439516	0.00458697
18	18:48979785	48979785	A	G	0.06	-0.167123	0.0582839	0.540536	0.00459521
18	18:17363074	17363074	G	A	0.074	-0.157628	0.0542285	0.417855	0.00459851
5	5:26350490	26350490	G	A	0.227	0.101238	0.0353515	0.533986	0.00459905
26	26:32595529	32595529	G	A	0.437	0.0852698	0.0291833	0.404246	0.00460024
5	5:67100010	67100010	C	T	0.076	-0.154828	0.0524713	0.386181	0.00460263
13	13:21821904	21821904	G	A	0.119	0.130442	0.0450101	0.423556	0.00460395
5	5:2996169	2996169	A	G	0.12	-0.135523	0.0444419	0.335978	0.00461359
5	5:2998128	2998128	G	A	0.12	-0.135523	0.0444419	0.335978	0.00461359
11	11:45025373	45025373	A	G	0.226	0.104455	0.0364815	0.470854	0.00461753
11	11:45037380	45037380	T	C	0.226	0.104455	0.0364815	0.470854	0.00461753
11	11:45180524	45180524	T	C	0.226	0.104455	0.0364815	0.470854	0.00461753
11	11:45181445	45181445	T	C	0.226	0.104455	0.0364815	0.470854	0.00461753
11	11:45183306	45183306	G	A	0.226	0.104455	0.0364815	0.470854	0.00461753
11	11:45196147	45196147	G	A	0.226	0.104455	0.0364815	0.470854	0.00461753
11	11:45207608	45207608	G	T	0.226	0.104455	0.0364815	0.470854	0.00461753
11	11:45278817	45278817	T	C	0.226	0.104455	0.0364815	0.470854	0.00461753
11	11:45297030	45297030	A	G	0.226	0.104455	0.0364815	0.470854	0.00461753
11	11:45305225	45305225	T	G	0.226	0.104455	0.0364815	0.470854	0.00461753
2	2:45381260	45381260	A	G	0.393	-0.0896359	0.0312328	0.457763	0.00462288
20	20:49435717	49435717	C	G	0.319	-0.0917899	0.0318719	0.44084	0.00462313
5	5:37747099	37747099	T	C	0.107	0.132166	0.0461771	0.535095	0.00462581
5	5:37759966	37759966	T	G	0.107	0.132166	0.0461771	0.535095	0.00462581
5	5:37762390	37762390	T	G	0.107	0.132166	0.0461771	0.535095	0.00462581
11	11:24340128	24340128	T	C	0.197	-0.107001	0.0364931	0.396727	0.00462583
30	30:16155659	16155659	T	C	0.473	0.0853522	0.0298512	0.479857	0.00462618
21	21:47993843	47993843	A	C	0.462	-0.0836589	0.0290891	0.447721	0.00462649
9	9:8154720	8154720	A	C	0.103	0.136467	0.0477752	0.488717	0.00463033
11	11:72560213	72560213	T	C	0.123	-0.129623	0.0450237	0.442785	0.00463362
4	4:86327409	86327409	C	T	0.264	-0.0944492	0.0327132	0.434687	0.00464067
4	4:86328479	86328479	A	G	0.264	-0.0944492	0.0327132	0.434687	0.00464067
33	33:1658261	1658261	A	G	0.431	0.0855182	0.029203	0.397912	0.00464123
34	34:37039626	37039626	A	G	0.101	-0.13386	0.0469023	0.500173	0.00465015
22	22:38902220	38902220	C	T	0.433	0.0855386	0.0292492	0.40078	0.00465668
11	11:41630899	41630899	A	C	0.072	-0.162322	0.0562887	0.432874	0.00466851
34	34:36769993	36769993	G	A	0.098	-0.137181	0.0480578	0.482727	0.0046778
5	5:2594281	2594281	G	A	0.12	-0.135496	0.0444598	0.334764	0.00468923
5	5:2599836	2599836	C	T	0.12	-0.135496	0.0444598	0.334764	0.00468923
5	5:2607317	2607317	G	A	0.12	-0.135496	0.0444598	0.334764	0.00468923
5	5:2617550	2617550	C	T	0.12	-0.135496	0.0444598	0.334764	0.00468923
5	5:2627898	2627898	C	T	0.12	-0.135496	0.0444598	0.334764	0.00468923
5	5:2636096	2636096	C	T	0.12	-0.135496	0.0444598	0.334764	0.00468923
5	5:2665302	2665302	A	G	0.12	-0.135496	0.0444598	0.334764	0.00468923
5	5:2673287	2673287	C	A	0.12	-0.135496	0.0444598	0.334764	0.00468923
5	5:2680929	2680929	T	C	0.12	-0.135496	0.0444598	0.334764	0.00468923
5	5:2698650	2698650	C	T	0.12	-0.135496	0.0444598	0.334764	0.00468923
5	5:2723245	2723245	G	A	0.12	-0.135496	0.0444598	0.334764	0.00468923
5	5:2725144	2725144	A	G	0.12	-0.135496	0.0444598	0.334764	0.00468923
5	5:2738496	2738496	T	C	0.12	-0.135496	0.0444598	0.334764	0.00468923
5	5:2753050	2753050	A	C	0.12	-0.135496	0.0444598	0.334764	0.00468923
5	5:2772317	2772317	C	T	0.12	-0.135496	0.0444598	0.334764	0.00468923
5	5:2773259	2773259	G	A	0.12	-0.135496	0.0444598	0.334764	0.00468923
7	7:79838885	79838885	A	G	0.473	0.0834427	0.0292321	0.476212	0.00470714
33	33:30926754	30926754	C	T	0.246	-0.0919265	0.0322445	0.48561	0.00471699
11	11:25891210	25891210	C	A	0.397	-0.0877485	0.0297887	0.384851	0.00471869
11	11:38256836	38256836	G	A	0.393	-0.0883492	0.0308425	0.455562	0.00472057
11	11:38262946	38262946	T	C	0.393	-0.0883492	0.0308425	0.455562	0.00472057
11	11:38266407	38266407	G	T	0.393	-0.0883492	0.0308425	0.455562	0.00472057
11	11:38282751	38282751	G	A	0.393	-0.0883492	0.0308425	0.455562	0.00472057
11	11:38287847	38287847	C	T	0.393	-0.0883492	0.0308425	0.455562	0.00472057
11	11:38335702	38335702	T	C	0.393	-0.0883492	0.0308425	0.455562	0.00472057
11	11:38339144	38339144	G	A	0.393	-0.0883492	0.0308425	0.455562	0.00472057
26	26:8359060	8359060	T	C	0.396	0.0898403	0.0314954	0.528034	0.00472655
1	1:59321929	59321929	T	C	0.132	-0.124562	0.0424894	0.390341	0.00472689
5	5:70083840	70083840	C	T	0.079	-0.145938	0.0509883	0.455056	0.00473807
13	13:22328902	22328902	A	G	0.158	-0.114002	0.0399806	0.478745	0.0047401
23	23:51478052	51478052	T	C	0.261	0.0918632	0.0317798	0.420996	0.00474125
22	22:40012128	40012128	G	A	0.235	0.0996899	0.0345867	0.430744	0.0047435
38	38:9519491	9519491	G	A	0.057	-0.181883	0.0635289	0.552385	0.0047498
38	38:9531410	9531410	G	A	0.057	-0.181883	0.0635289	0.552385	0.0047498
11	11:39657263	39657263	C	T	0.129	-0.118124	0.0413343	0.460384	0.00475166
16	16:49994722	49994722	T	C	0.371	-0.0867675	0.0304033	0.470433	0.00475187
38	38:9501430	9501430	G	T	0.078	-0.15857	0.055168	0.568927	0.00475403
11	11:68682936	68682936	C	T	0.473	0.08953	0.0314028	0.475854	0.00476759
11	11:68687375	68687375	T	C	0.473	0.08953	0.0314028	0.475854	0.00476759
11	11:68694211	68694211	C	T	0.473	0.08953	0.0314028	0.475854	0.00476759
11	11:68703483	68703483	A	G	0.473	0.08953	0.0314028	0.475854	0.00476759
5	5:1853379	1853379	G	A	0.248	-0.101089	0.0340524	0.370198	0.00476916
5	5:13494139	13494139	G	A	0.29	-0.0947196	0.0327801	0.420324	0.0047863
1	1:58651737	58651737	A	C	0.053	-0.18713	0.0653914	0.450455	0.00479148
13	13:22419850	22419850	C	T	0.164	-0.111495	0.0391286	0.473826	0.00479333
22	22:39189734	39189734	C	T	0.438	0.085827	0.0297576	0.425844	0.00479844
34	34:36686597	36686597	G	A	0.098	-0.13674	0.0480422	0.481533	0.00480105
19	19:45400676	45400676	T	C	0.404	-0.0837695	0.0292241	0.443515	0.00480421
22	22:60455094	60455094	A	G	0.208	0.104177	0.0360372	0.417769	0.00480462
32	32:1790328	1790328	T	C	0.2	0.106595	0.0374904	0.508083	0.00480749
32	32:1796919	1796919	G	A	0.2	0.106595	0.0374904	0.508083	0.00480749
4	4:37796797	37796797	T	C	0.238	0.102523	0.0355629	0.425247	0.00481307
4	4:37808412	37808412	G	A	0.238	0.102523	0.0355629	0.425247	0.00481307
2	2:36979522	36979522	G	A	0.214	-0.105298	0.0366089	0.43281	0.00481378
2	2:36994583	36994583	C	T	0.214	-0.105298	0.0366089	0.43281	0.00481378
33	33:1312310	1312310	A	G	0.23	0.0953602	0.0333491	0.4513	0.00481541
38	38:6877734	6877734	C	T	0.066	-0.168886	0.058993	0.559233	0.00481603
20	20:4596875	4596875	C	G	0.057	0.168828	0.0584216	0.418667	0.00481821
20	20:4604976	4604976	G	A	0.057	0.168828	0.0584216	0.418667	0.00481821
20	20:4607182	4607182	T	C	0.057	0.168828	0.0584216	0.418667	0.00481821
20	20:4615690	4615690	C	T	0.057	0.168828	0.0584216	0.418667	0.00481821
20	20:4633416	4633416	C	T	0.057	0.168828	0.0584216	0.418667	0.00481821
20	20:4645689	4645689	C	T	0.057	0.168828	0.0584216	0.418667	0.00481821
20	20:5285594	5285594	G	A	0.057	0.168828	0.0584216	0.418667	0.00481821
4	4:85886757	85886757	G	A	0.508	-0.0821899	0.0287792	0.458354	0.00481841
5	5:27012586	27012586	C	G	0.215	0.102969	0.0362087	0.520611	0.00482708
26	26:8029137	8029137	C	T	0.393	0.0898258	0.0315634	0.530128	0.00483196
7	7:11863711	11863711	A	G	0.096	-0.142313	0.0488305	0.399724	0.00483291
7	7:11906276	11906276	C	G	0.096	-0.142313	0.0488305	0.399724	0.00483291
7	7:11910208	11910208	A	G	0.096	-0.142313	0.0488305	0.399724	0.00483291
11	11:44061283	44061283	C	T	0.494	0.0883591	0.0310515	0.529964	0.00483627
4	4:85761171	85761171	G	A	0.515	-0.0858054	0.0300256	0.453854	0.00483715
33	33:29072325	29072325	T	C	0.117	0.125626	0.0440228	0.457455	0.0048401
33	33:29078735	29078735	G	C	0.117	0.125626	0.0440228	0.457455	0.0048401
7	7:15364500	15364500	A	G	0.092	-0.144173	0.04992	0.418622	0.00484218
15	15:59596072	59596072	T	A	0.204	-0.105995	0.0371821	0.543054	0.00484306
5	5:815482	815482	G	A	0.208	-0.106376	0.0357894	0.365006	0.00485917
5	5:816984	816984	A	G	0.208	-0.106376	0.0357894	0.365006	0.00485917
5	5:973173	973173	A	T	0.208	-0.106376	0.0357894	0.365006	0.00485917
25	25:48550460	48550460	G	A	0.418	0.0872511	0.0305671	0.552995	0.00485935
20	20:49369984	49369984	C	T	0.111	-0.127464	0.0448378	0.524611	0.00486145
34	34:39344873	39344873	T	C	0.363	-0.0859602	0.0302062	0.535215	0.00486415
1	1:99672582	99672582	C	T	0.142	-0.116347	0.0409557	0.486477	0.00486584
1	1:99788800	99788800	T	G	0.142	-0.116347	0.0409557	0.486477	0.00486584
1	1:99806354	99806354	G	T	0.142	-0.116347	0.0409557	0.486477	0.00486584
1	1:99812283	99812283	T	G	0.142	-0.116347	0.0409557	0.486477	0.00486584
15	15:63602126	63602126	A	G	0.297	-0.0861425	0.0299488	0.427207	0.00487031
5	5:16002185	16002185	A	G	0.13	0.124946	0.0437391	0.448743	0.00488618
10	10:58106073	58106073	T	C	0.179	0.104999	0.0369079	0.468622	0.00489514
10	10:58122728	58122728	T	C	0.179	0.104999	0.0369079	0.468622	0.00489514
5	5:37081330	37081330	A	C	0.461	0.0893893	0.030548	0.387958	0.00489637
4	4:86573594	86573594	A	G	0.389	-0.0858282	0.0301135	0.45751	0.00489826
22	22:60382875	60382875	G	A	0.208	0.103883	0.0361575	0.428036	0.00490111
1	1:60228175	60228175	G	C	0.056	-0.177664	0.0620957	0.441414	0.00490591
1	1:60269071	60269071	C	T	0.056	-0.177664	0.0620957	0.441414	0.00490591
5	5:37178603	37178603	C	T	0.463	0.0892682	0.0306395	0.395689	0.0049068
7	7:77981146	77981146	C	T	0.143	-0.113227	0.0398191	0.469394	0.00490824
11	11:43811540	43811540	C	T	0.339	0.0904056	0.0316495	0.448109	0.00492428
18	18:11293866	11293866	T	A	0.087	-0.145057	0.050057	0.406946	0.00492586
5	5:5491380	5491380	T	C	0.292	-0.0919549	0.0317896	0.410103	0.0049329
20	20:49369199	49369199	A	G	0.111	-0.127263	0.0448512	0.523438	0.00493555
5	5:37464179	37464179	A	G	0.487	0.08976	0.0306954	0.387488	0.00494409
5	5:37475089	37475089	G	A	0.487	0.08976	0.0306954	0.387488	0.00494409
5	5:37480815	37480815	C	A	0.487	0.08976	0.0306954	0.387488	0.00494409
5	5:37483134	37483134	A	G	0.487	0.08976	0.0306954	0.387488	0.00494409
5	5:37492356	37492356	C	T	0.487	0.08976	0.0306954	0.387488	0.00494409
37	37:28586737	28586737	A	G	0.35	0.0855475	0.0300881	0.461687	0.00495433
5	5:4181754	4181754	C	T	0.265	-0.0942733	0.0324145	0.397423	0.00495624
29	29:40695282	40695282	G	C	0.447	0.0847182	0.0294294	0.418293	0.0049612
5	5:2489528	2489528	T	C	0.128	-0.128988	0.0429945	0.347453	0.00496856
38	38:15472614	15472614	G	A	0.33	-0.0921191	0.031301	0.375584	0.00497093
39	39:114602428	114602428	T	G	0.276	0.0717382	0.0253334	0.496964	0.00497549
26	26:8063144	8063144	T	G	0.393	0.0895198	0.031579	0.527675	0.0049857
21	21:19612642	19612642	G	A	0.1	-0.13572	0.0476158	0.44751	0.00499608
11	11:41573984	41573984	G	A	0.116	-0.128596	0.0441253	0.390249	0.00499898
5	5:15999045	15999045	C	T	0.129	0.125075	0.043922	0.449619	0.00501189
32	32:2117337	2117337	G	T	0.193	0.106225	0.0375471	0.508299	0.00501779
33	33:28850111	28850111	T	G	0.383	0.0870347	0.0307211	0.476095	0.00501999
18	18:11319023	11319023	G	C	0.089	-0.143835	0.0495601	0.399675	0.00502136
16	16:49859421	49859421	C	T	0.379	-0.0851981	0.0300231	0.465986	0.00502192
5	5:37339600	37339600	C	T	0.463	0.0891302	0.0306407	0.393642	0.00502716
39	39:81758773	81758773	A	G	0.071	-0.12416	0.0436672	0.453376	0.00502752
39	39:81807473	81807473	C	T	0.071	-0.12416	0.0436672	0.453376	0.00502752
39	39:82025164	82025164	C	A	0.071	-0.12416	0.0436672	0.453376	0.00502752
8	8:60494919	60494919	C	T	0.082	-0.145495	0.0514438	0.500484	0.00502812
26	26:7965947	7965947	G	A	0.393	0.0893774	0.0315749	0.52589	0.00504069
26	26:7971418	7971418	T	A	0.393	0.0893774	0.0315749	0.52589	0.00504069
26	26:8002658	8002658	A	G	0.393	0.0893774	0.0315749	0.52589	0.00504069
26	26:8003078	8003078	C	T	0.393	0.0893774	0.0315749	0.52589	0.00504069
26	26:8032888	8032888	A	G	0.393	0.0893774	0.0315749	0.52589	0.00504069
26	26:8075416	8075416	G	T	0.393	0.0893774	0.0315749	0.52589	0.00504069
26	26:8083954	8083954	T	C	0.393	0.0893774	0.0315749	0.52589	0.00504069
39	39:88041939	88041939	C	T	0.458	-0.0673643	0.0237891	0.527646	0.00504084
11	11:38338591	38338591	A	G	0.395	-0.0877865	0.030868	0.453283	0.00504958
4	4:35300973	35300973	T	C	0.204	0.104975	0.0368202	0.442421	0.00505143
1	1:93029028	93029028	T	C	0.175	-0.110508	0.039042	0.477301	0.00505806
22	22:60465427	60465427	G	A	0.194	0.105565	0.0369769	0.435137	0.00507245
5	5:26978662	26978662	A	G	0.144	0.11765	0.0415279	0.537297	0.00507559
5	5:26980858	26980858	T	C	0.144	0.11765	0.0415279	0.537297	0.00507559
5	5:26987143	26987143	A	G	0.144	0.11765	0.0415279	0.537297	0.00507559
2	2:46109872	46109872	C	T	0.201	0.106874	0.0378218	0.493283	0.00507631
2	2:46594956	46594956	A	G	0.201	0.106874	0.0378218	0.493283	0.00507631
11	11:39893762	39893762	C	T	0.405	-0.0883416	0.030772	0.423322	0.00507877
22	22:37121709	37121709	A	C	0.431	0.0844849	0.029211	0.40334	0.00508466
33	33:30918270	30918270	C	T	0.246	-0.0911818	0.0322571	0.482625	0.00508638
4	4:83091314	83091314	C	T	0.432	-0.0873106	0.0306898	0.447563	0.00509328
5	5:10224543	10224543	A	G	0.139	-0.123984	0.0436712	0.453968	0.00509568
5	5:10274430	10274430	G	C	0.139	-0.123984	0.0436712	0.453968	0.00509568
5	5:10289405	10289405	T	G	0.139	-0.123984	0.0436712	0.453968	0.00509568
5	5:10345235	10345235	C	T	0.139	-0.123984	0.0436712	0.453968	0.00509568
5	5:10350148	10350148	A	G	0.139	-0.123984	0.0436712	0.453968	0.00509568
5	5:10352320	10352320	T	C	0.139	-0.123984	0.0436712	0.453968	0.00509568
5	5:48961681	48961681	C	T	0.282	0.0939945	0.0332056	0.469105	0.00510058
13	13:21824515	21824515	C	T	0.158	-0.112357	0.0397313	0.476287	0.00510263
13	13:22133624	22133624	C	A	0.158	-0.112357	0.0397313	0.476287	0.00510263
13	13:22135641	22135641	C	T	0.158	-0.112357	0.0397313	0.476287	0.00510263
13	13:22279673	22279673	G	A	0.158	-0.112357	0.0397313	0.476287	0.00510263
13	13:22288378	22288378	T	C	0.158	-0.112357	0.0397313	0.476287	0.00510263
4	4:83049109	83049109	C	T	0.423	-0.08706	0.0305965	0.445727	0.00510669
4	4:83051128	83051128	T	A	0.423	-0.08706	0.0305965	0.445727	0.00510669
4	4:83059119	83059119	G	T	0.423	-0.08706	0.0305965	0.445727	0.00510669
5	5:51318461	51318461	C	T	0.082	0.149836	0.0527976	0.45479	0.0051082
5	5:51614872	51614872	T	G	0.082	0.149836	0.0527976	0.45479	0.0051082
5	5:17959400	17959400	C	T	0.374	0.0837052	0.029381	0.440162	0.00511119
20	20:5852534	5852534	A	C	0.48	-0.0845338	0.0298025	0.457119	0.0051121
9	9:8315108	8315108	G	T	0.115	0.129557	0.045887	0.512474	0.00511378
7	7:13096992	13096992	G	A	0.101	-0.136712	0.0479115	0.434331	0.00511961
26	26:32573814	32573814	A	G	0.433	0.0844857	0.0292877	0.406058	0.0051241
26	26:32576234	32576234	A	C	0.433	0.0844857	0.0292877	0.406058	0.0051241
26	26:32578429	32578429	A	G	0.433	0.0844857	0.0292877	0.406058	0.0051241
26	26:32584710	32584710	A	G	0.433	0.0844857	0.0292877	0.406058	0.0051241
5	5:10279219	10279219	T	C	0.139	-0.123653	0.0435945	0.454158	0.00513334
5	5:66554987	66554987	A	G	0.063	-0.165543	0.0575798	0.413543	0.00513434
34	34:39241252	39241252	T	C	0.485	-0.0840836	0.0293803	0.425231	0.00513658
20	20:8943146	8943146	C	T	0.087	0.144196	0.0503345	0.421151	0.00514654
18	18:26608301	26608301	T	C	0.136	-0.116771	0.04108	0.445162	0.00515565
1	1:93553331	93553331	C	T	0.443	0.0848895	0.029887	0.447321	0.00515939
5	5:5522982	5522982	T	C	0.284	-0.0922747	0.0320525	0.409272	0.00516155
5	5:5534933	5534933	T	C	0.284	-0.0922747	0.0320525	0.409272	0.00516155
5	5:5621299	5621299	A	C	0.284	-0.0922747	0.0320525	0.409272	0.00516155
5	5:5630626	5630626	G	A	0.284	-0.0922747	0.0320525	0.409272	0.00516155
2	2:41434154	41434154	C	A	0.279	-0.0977074	0.0342407	0.432377	0.0051636
26	26:10351797	10351797	C	A	0.447	0.0848606	0.0300909	0.491869	0.00516398
26	26:10364570	10364570	T	C	0.447	0.0848606	0.0300909	0.491869	0.00516398
18	18:26606299	26606299	C	T	0.107	-0.129	0.0456968	0.478426	0.00516584
11	11:25100029	25100029	G	A	0.324	-0.090578	0.0308667	0.374479	0.00518475
35	35:12852654	12852654	A	G	0.305	0.0923491	0.0322782	0.422354	0.0051848
13	13:39963209	39963209	G	A	0.181	-0.108225	0.0382419	0.548914	0.00520436
7	7:77682698	77682698	T	C	0.158	-0.106788	0.0378158	0.46985	0.00520477
25	25:9292297	9292297	A	G	0.058	0.17153	0.0603108	0.438596	0.00520675
1	1:62114173	62114173	T	C	0.148	-0.117486	0.041702	0.491434	0.00520913
18	18:27918650	27918650	G	T	0.064	-0.168648	0.0594529	0.446094	0.00521627
16	16:58405270	58405270	C	T	0.338	-0.0869475	0.0308781	0.499219	0.00522118
4	4:87639759	87639759	G	A	0.289	-0.0908022	0.031877	0.434184	0.00522159
4	4:87649283	87649283	C	T	0.289	-0.0908022	0.031877	0.434184	0.00522159
5	5:50868411	50868411	C	T	0.118	0.129647	0.0454027	0.424874	0.00523458
39	39:24243258	24243258	A	G	0.487	0.068579	0.0242515	0.548045	0.00523584
37	37:14299531	14299531	A	C	0.459	-0.0804089	0.0285637	0.493989	0.00523844
5	5:68286748	68286748	G	A	0.158	-0.110651	0.0390545	0.449434	0.00523926
38	38:4230960	4230960	G	A	0.509	-0.0811382	0.0283701	0.419279	0.00524732
7	7:13729192	13729192	G	C	0.101	-0.136462	0.0479877	0.436024	0.00524732
7	7:13749989	13749989	A	G	0.101	-0.136462	0.0479877	0.436024	0.00524732
7	7:13752279	13752279	T	C	0.101	-0.136462	0.0479877	0.436024	0.00524732
6	6:76863593	76863593	C	T	0.431	0.081685	0.0289561	0.469085	0.00524757
11	11:74268437	74268437	A	G	0.237	-0.0970339	0.0341538	0.437091	0.00525592
26	26:8619772	8619772	A	G	0.404	0.0871675	0.0309804	0.510242	0.00525971
7	7:12971353	12971353	C	T	0.101	-0.136373	0.0479337	0.433738	0.00526069
7	7:12989133	12989133	T	A	0.101	-0.136373	0.0479337	0.433738	0.00526069
7	7:13006607	13006607	A	G	0.101	-0.136373	0.0479337	0.433738	0.00526069
38	38:7808284	7808284	T	C	0.281	-0.0905284	0.0321323	0.477779	0.00526209
4	4:85196817	85196817	C	T	0.498	-0.0812904	0.028733	0.454377	0.00526744
22	22:61135569	61135569	T	C	0.132	-0.119016	0.042314	0.497653	0.00527022
22	22:61140475	61140475	A	G	0.132	-0.119016	0.042314	0.497653	0.00527022
26	26:7884793	7884793	A	G	0.393	0.08859	0.0314612	0.525972	0.00527114
21	21:18375798	18375798	A	G	0.177	0.109963	0.0387448	0.44046	0.00527812
11	11:40712600	40712600	A	C	0.053	-0.176962	0.0623217	0.437018	0.00528093
11	11:40714808	40714808	G	T	0.053	-0.176962	0.0623217	0.437018	0.00528093
1	1:59719020	59719020	A	G	0.149	-0.115917	0.0411876	0.482814	0.00528231
1	1:59819121	59819121	T	C	0.149	-0.115917	0.0411876	0.482814	0.00528231
39	39:81145819	81145819	T	C	0.096	-0.106887	0.0378423	0.456971	0.00528551
34	34:35979778	35979778	T	C	0.1	-0.131905	0.0468435	0.476766	0.0052865
11	11:44195829	44195829	C	T	0.377	0.0885213	0.0314839	0.505595	0.00528661
18	18:49991491	49991491	C	T	0.34	-0.0876224	0.0311481	0.519301	0.00529279
10	10:58193743	58193743	G	A	0.179	0.10405	0.0368887	0.463758	0.00530654
11	11:44844887	44844887	G	T	0.468	-0.0879943	0.0312383	0.535644	0.00530681
11	11:44849786	44849786	A	G	0.468	-0.0879943	0.0312383	0.535644	0.00530681
11	11:44853536	44853536	G	A	0.468	-0.0879943	0.0312383	0.535644	0.00530681
34	34:39157908	39157908	A	G	0.412	-0.0824067	0.0291958	0.459095	0.00530935
34	34:39164124	39164124	T	C	0.412	-0.0824067	0.0291958	0.459095	0.00530935
38	38:1206471	1206471	T	G	0.511	-0.0819371	0.0291511	0.487744	0.00532243
2	2:41951746	41951746	C	A	0.345	-0.0920647	0.0318877	0.397307	0.00532559
10	10:65309595	65309595	G	A	0.407	0.0827077	0.0293427	0.464298	0.00532714
7	7:80715018	80715018	A	G	0.361	-0.0859	0.0305594	0.484369	0.00532981
11	11:68787394	68787394	C	G	0.088	-0.146913	0.0522738	0.48514	0.00533648
4	4:25734704	25734704	T	G	0.056	0.178066	0.0622275	0.413287	0.00533838
5	5:2983073	2983073	T	C	0.128	-0.128296	0.0429805	0.344082	0.00533984
34	34:39306328	39306328	A	G	0.339	-0.0859596	0.0305988	0.517416	0.00534612
26	26:23397566	23397566	G	C	0.06	-0.177003	0.0630449	0.502994	0.00535104
26	26:23402568	23402568	T	C	0.06	-0.177003	0.0630449	0.502994	0.00535104
13	13:7360912	7360912	G	C	0.106	0.133268	0.0473851	0.53049	0.0053552
1	1:57419011	57419011	C	T	0.463	-0.085858	0.0305191	0.471957	0.00536884
4	4:85578177	85578177	G	A	0.478	-0.0828578	0.0292378	0.439765	0.0053742
11	11:41246438	41246438	A	C	0.114	-0.123871	0.0441432	0.497006	0.00537594
32	32:867021	867021	G	A	0.188	0.108387	0.0385748	0.47804	0.00537608
4	4:86555705	86555705	C	A	0.389	-0.0849688	0.0301008	0.451961	0.00537978
8	8:54160561	54160561	T	C	0.124	-0.127713	0.0437047	0.374356	0.00537998
38	38:8102404	8102404	G	A	0.402	-0.0821018	0.0292776	0.498355	0.00540663
11	11:24344442	24344442	A	G	0.375	-0.0874483	0.0302388	0.389565	0.00541
6	6:76593466	76593466	A	C	0.422	0.0809004	0.0288449	0.487441	0.00541889
5	5:2788437	2788437	A	G	0.128	-0.128267	0.0429986	0.342935	0.0054226
37	37:21916397	21916397	G	A	0.083	-0.153227	0.0535499	0.408842	0.00542373
17	17:40622110	40622110	C	G	0.256	-0.0961585	0.0329576	0.374219	0.00542512
5	5:68215241	68215241	T	C	0.139	-0.115026	0.040727	0.445375	0.00542964
4	4:29561049	29561049	T	C	0.146	0.119683	0.0424294	0.450217	0.00543142
20	20:4780225	4780225	T	C	0.049	0.184976	0.0651307	0.427831	0.00543943
20	20:5556745	5556745	A	G	0.049	0.184976	0.0651307	0.427831	0.00543943
20	20:5566233	5566233	C	T	0.049	0.184976	0.0651307	0.427831	0.00543943
20	20:5570978	5570978	G	A	0.049	0.184976	0.0651307	0.427831	0.00543943
20	20:5583272	5583272	A	G	0.049	0.184976	0.0651307	0.427831	0.00543943
4	4:86474475	86474475	T	C	0.453	0.0831908	0.0294216	0.442731	0.00544729
7	7:79249626	79249626	G	A	0.296	-0.0881654	0.0314322	0.478904	0.00545115
38	38:15698826	15698826	T	C	0.402	-0.0863117	0.0303245	0.421474	0.00545396
9	9:8338708	8338708	A	T	0.078	0.152686	0.054476	0.518251	0.00545656
11	11:44577203	44577203	T	C	0.368	0.08801	0.0312475	0.455281	0.00546122
11	11:44580546	44580546	C	T	0.368	0.08801	0.0312475	0.455281	0.00546122
11	11:44591183	44591183	A	G	0.368	0.08801	0.0312475	0.455281	0.00546122
11	11:44619323	44619323	C	A	0.368	0.08801	0.0312475	0.455281	0.00546122
11	11:44628431	44628431	G	A	0.368	0.08801	0.0312475	0.455281	0.00546122
11	11:44636186	44636186	T	G	0.368	0.08801	0.0312475	0.455281	0.00546122
22	22:39249783	39249783	C	A	0.439	0.0846601	0.0298061	0.426884	0.00546858
2	2:45385457	45385457	C	G	0.203	0.105645	0.0377295	0.497693	0.00547632
2	2:45386464	45386464	T	G	0.203	0.105645	0.0377295	0.497693	0.00547632
2	2:45388870	45388870	G	A	0.203	0.105645	0.0377295	0.497693	0.00547632
2	2:45438563	45438563	T	C	0.203	0.105645	0.0377295	0.497693	0.00547632
2	2:45441721	45441721	C	T	0.203	0.105645	0.0377295	0.497693	0.00547632
2	2:45456494	45456494	T	C	0.203	0.105645	0.0377295	0.497693	0.00547632
26	26:8462635	8462635	G	A	0.397	0.0883676	0.0315255	0.5257	0.00547673
5	5:53371506	53371506	T	C	0.129	0.121914	0.0435111	0.481468	0.00548531
35	35:12638538	12638538	C	T	0.306	0.0905688	0.0318817	0.424301	0.00548605
35	35:12659332	12659332	T	C	0.306	0.0905688	0.0318817	0.424301	0.00548605
21	21:20537056	20537056	C	G	0.415	-0.0835653	0.0298051	0.476882	0.00548738
21	21:20582062	20582062	G	A	0.415	-0.0835653	0.0298051	0.476882	0.00548738
21	21:20599564	20599564	T	C	0.415	-0.0835653	0.0298051	0.476882	0.00548738
11	11:41217026	41217026	C	T	0.387	-0.0876832	0.0309576	0.434377	0.0055015
4	4:85264140	85264140	A	G	0.527	-0.085755	0.0304353	0.449581	0.00551291
38	38:15534208	15534208	C	T	0.483	-0.0842794	0.0299194	0.448316	0.00551334
35	35:11343250	11343250	T	G	0.358	0.0888944	0.0316782	0.464711	0.00552536
22	22:39887768	39887768	T	G	0.236	0.0978177	0.0345897	0.434728	0.00553206
22	22:39978469	39978469	G	A	0.236	0.0978177	0.0345897	0.434728	0.00553206
10	10:65470900	65470900	G	A	0.371	-0.0834561	0.0292812	0.412783	0.00553508
33	33:1541103	1541103	T	C	0.263	0.090204	0.0321848	0.470247	0.00553849
33	33:1541151	1541151	G	T	0.263	0.090204	0.0321848	0.470247	0.00553849
37	37:24039213	24039213	T	C	0.246	0.0923479	0.0330263	0.496528	0.00553918
37	37:24042060	24042060	A	G	0.246	0.0923479	0.0330263	0.496528	0.00553918
11	11:38711905	38711905	A	G	0.298	0.0904497	0.0323498	0.503654	0.00554032
4	4:84304596	84304596	A	C	0.464	-0.0822081	0.0292298	0.45359	0.00554125
23	23:49114003	49114003	C	T	0.421	0.0799801	0.0284484	0.45157	0.0055527
1	1:93151289	93151289	A	G	0.41	0.0850428	0.0303583	0.472554	0.00555341
1	1:93166693	93166693	G	A	0.41	0.0850428	0.0303583	0.472554	0.00555341
1	1:93168992	93168992	T	C	0.41	0.0850428	0.0303583	0.472554	0.00555341
35	35:12668290	12668290	T	C	0.306	0.0904155	0.0318656	0.423689	0.00555362
34	34:36545444	36545444	A	G	0.101	-0.132734	0.0474573	0.484482	0.00555814
1	1:94455905	94455905	C	T	0.405	0.086473	0.0305191	0.427331	0.00556545
2	2:44207018	44207018	A	G	0.33	-0.0939276	0.0325897	0.391257	0.00556951
21	21:7739478	7739478	T	C	0.119	-0.120592	0.0429525	0.456854	0.00557433
5	5:26614368	26614368	G	A	0.184	0.108344	0.0385169	0.55794	0.0055755
16	16:49853964	49853964	G	T	0.378	-0.084359	0.0301148	0.468955	0.00558175
16	16:49869101	49869101	A	C	0.378	-0.084359	0.0301148	0.468955	0.00558175
16	16:49874410	49874410	C	T	0.378	-0.084359	0.0301148	0.468955	0.00558175
5	5:19023801	19023801	C	T	0.367	0.0819617	0.0292721	0.471112	0.00558262
8	8:66088475	66088475	G	T	0.217	0.10012	0.0356311	0.451395	0.00558687
8	8:66094847	66094847	C	T	0.217	0.10012	0.0356311	0.451395	0.00558687
5	5:1966847	1966847	A	T	0.251	-0.0986621	0.0338774	0.372812	0.00559888
4	4:87255726	87255726	A	C	0.3	-0.0892276	0.0315213	0.429039	0.00561603
11	11:25232580	25232580	A	G	0.286	-0.0925382	0.0322795	0.399054	0.0056301
11	11:25246965	25246965	A	G	0.286	-0.0925382	0.0322795	0.399054	0.0056301
11	11:25247102	25247102	G	A	0.286	-0.0925382	0.0322795	0.399054	0.0056301
5	5:9859269	9859269	A	G	0.144	-0.120317	0.0429084	0.456317	0.00563817
5	5:9937949	9937949	T	C	0.144	-0.120317	0.0429084	0.456317	0.00563817
5	5:9952575	9952575	C	T	0.144	-0.120317	0.0429084	0.456317	0.00563817
13	13:22117991	22117991	A	G	0.157	-0.111893	0.0400668	0.480588	0.0056498
13	13:22124454	22124454	T	C	0.157	-0.111893	0.0400668	0.480588	0.0056498
13	13:22222741	22222741	T	G	0.157	-0.111893	0.0400668	0.480588	0.0056498
13	13:22224766	22224766	A	G	0.157	-0.111893	0.0400668	0.480588	0.0056498
13	13:22257458	22257458	A	G	0.157	-0.111893	0.0400668	0.480588	0.0056498
13	13:22261801	22261801	A	G	0.157	-0.111893	0.0400668	0.480588	0.0056498
13	13:22266783	22266783	T	C	0.157	-0.111893	0.0400668	0.480588	0.0056498
33	33:2121135	2121135	A	G	0.439	0.0837657	0.0294985	0.415922	0.00565952
4	4:83089733	83089733	A	G	0.431	-0.0860968	0.030679	0.451829	0.00566815
4	4:83097444	83097444	T	C	0.431	-0.0860968	0.030679	0.451829	0.00566815
21	21:20605132	20605132	C	T	0.401	-0.0836502	0.0299726	0.483124	0.0056697
5	5:26736346	26736346	T	C	0.253	0.0965553	0.0343896	0.558897	0.0056745
11	11:41499604	41499604	T	C	0.118	-0.124835	0.043631	0.397826	0.00568023
1	1:112980044	112980044	T	C	0.049	-0.182043	0.065255	0.520618	0.00568124
1	1:113048652	113048652	C	T	0.049	-0.182043	0.065255	0.520618	0.00568124
1	1:113061476	113061476	A	G	0.049	-0.182043	0.065255	0.520618	0.00568124
1	1:113067011	113067011	T	C	0.049	-0.182043	0.065255	0.520618	0.00568124
1	1:113071767	113071767	A	G	0.049	-0.182043	0.065255	0.520618	0.00568124
16	16:49644285	49644285	T	C	0.375	-0.0844118	0.0302049	0.470444	0.005682
13	13:21936136	21936136	A	G	0.12	0.126878	0.0449511	0.42977	0.00568323
13	13:21936561	21936561	A	C	0.12	0.126878	0.0449511	0.42977	0.00568323
38	38:4127366	4127366	C	T	0.328	0.0852862	0.0305321	0.472737	0.00568391
38	38:4160730	4160730	T	G	0.328	0.0852862	0.0305321	0.472737	0.00568391
38	38:4178519	4178519	A	G	0.328	0.0852862	0.0305321	0.472737	0.00568391
22	22:60358487	60358487	A	G	0.192	0.105144	0.0374035	0.442246	0.0056844
2	2:38892701	38892701	A	G	0.223	-0.102434	0.036262	0.428737	0.00569928
39	39:114571738	114571738	C	G	0.273	0.0709713	0.0254655	0.491605	0.00570045
11	11:45101922	45101922	C	T	0.227	0.101926	0.0364808	0.469351	0.00570431
6	6:76655308	76655308	A	G	0.345	0.0811605	0.0290637	0.470149	0.00570774
34	34:39230710	39230710	T	G	0.475	0.0830584	0.0297056	0.462553	0.00571916
1	1:56122118	56122118	C	T	0.49	0.0835035	0.0299748	0.495168	0.00571984
16	16:49646646	49646646	T	C	0.37	-0.0847334	0.0303426	0.469421	0.00572429
24	24:47547676	47547676	C	T	0.468	-0.0788409	0.0281234	0.448946	0.00572508
24	24:47576769	47576769	T	C	0.468	-0.0788409	0.0281234	0.448946	0.00572508
24	24:47586769	47586769	A	G	0.468	-0.0788409	0.0281234	0.448946	0.00572508
24	24:47629714	47629714	A	G	0.468	-0.0788409	0.0281234	0.448946	0.00572508
24	24:47651928	47651928	C	T	0.468	-0.0788409	0.0281234	0.448946	0.00572508
24	24:47681200	47681200	T	C	0.468	-0.0788409	0.0281234	0.448946	0.00572508
5	5:37074436	37074436	G	A	0.46	0.0879227	0.0306425	0.39193	0.00572841
5	5:37079060	37079060	C	G	0.46	0.0879227	0.0306425	0.39193	0.00572841
5	5:37079787	37079787	T	C	0.46	0.0879227	0.0306425	0.39193	0.00572841
5	5:37116781	37116781	A	G	0.46	0.0879227	0.0306425	0.39193	0.00572841
5	5:37140422	37140422	A	G	0.46	0.0879227	0.0306425	0.39193	0.00572841
5	5:37142511	37142511	G	A	0.46	0.0879227	0.0306425	0.39193	0.00572841
5	5:37146463	37146463	T	C	0.46	0.0879227	0.0306425	0.39193	0.00572841
39	39:77906571	77906571	T	C	0.068	-0.122263	0.0434696	0.437338	0.00572994
9	9:60689518	60689518	G	A	0.299	0.0882156	0.0313594	0.570234	0.00573122
5	5:15594231	15594231	C	A	0.111	0.133514	0.0477984	0.466332	0.00573149
1	1:95246426	95246426	C	T	0.161	-0.112211	0.040046	0.451564	0.00573289
5	5:26719026	26719026	A	G	0.18	0.108514	0.0387777	0.549683	0.00573616
5	5:51517556	51517556	C	A	0.429	-0.0843927	0.0302129	0.466209	0.00574148
5	5:51519903	51519903	A	G	0.429	-0.0843927	0.0302129	0.466209	0.00574148
7	7:11837952	11837952	T	C	0.098	-0.138749	0.0485465	0.399763	0.00574804
4	4:87468413	87468413	T	C	0.34	0.0836408	0.0298539	0.450533	0.00575848
4	4:87062561	87062561	T	C	0.298	-0.0891299	0.0316355	0.433408	0.00576579
4	4:87064203	87064203	C	T	0.298	-0.0891299	0.0316355	0.433408	0.00576579
39	39:114557714	114557714	G	A	0.274	0.0707482	0.0254181	0.489375	0.00576694
20	20:6748231	6748231	G	A	0.076	0.147004	0.0523658	0.440797	0.00577054
5	5:15969955	15969955	G	A	0.487	-0.0800129	0.0285277	0.44537	0.00577821
11	11:41744694	41744694	T	C	0.388	-0.0868814	0.0309154	0.439227	0.00579533
4	4:88169129	88169129	A	C	0.368	-0.0826391	0.0295323	0.452764	0.00579711
39	39:88018327	88018327	A	C	0.472	-0.0661845	0.0237741	0.524134	0.00580093
26	26:8419566	8419566	T	C	0.395	0.0879874	0.0316177	0.523944	0.00580949
26	26:8458832	8458832	G	T	0.395	0.0879874	0.0316177	0.523944	0.00580949
26	26:8469990	8469990	T	C	0.395	0.0879874	0.0316177	0.523944	0.00580949
26	26:11946161	11946161	A	G	0.387	0.0855336	0.0307653	0.511386	0.00581696
26	26:11971665	11971665	G	A	0.387	0.0855336	0.0307653	0.511386	0.00581696
28	28:29664504	29664504	A	T	0.305	-0.0883431	0.0317602	0.484366	0.0058211
11	11:44235805	44235805	T	C	0.466	-0.086835	0.0312202	0.524632	0.00583734
11	11:44243662	44243662	G	A	0.466	-0.086835	0.0312202	0.524632	0.00583734
11	11:44245756	44245756	C	T	0.466	-0.086835	0.0312202	0.524632	0.00583734
11	11:44253124	44253124	G	C	0.466	-0.086835	0.0312202	0.524632	0.00583734
16	16:50244918	50244918	T	C	0.369	-0.0848475	0.0304636	0.471474	0.00583738
30	30:16131755	16131755	G	A	0.473	0.0832009	0.0298987	0.476649	0.00584523
5	5:55281620	55281620	G	A	0.41	-0.0848451	0.0305072	0.525916	0.00584936
38	38:9649036	9649036	A	G	0.059	-0.175074	0.0626771	0.551535	0.00585533
1	1:99544679	99544679	A	G	0.141	-0.113875	0.0409893	0.486484	0.00587401
1	1:99552608	99552608	C	T	0.141	-0.113875	0.0409893	0.486484	0.00587401
1	1:99554998	99554998	G	T	0.141	-0.113875	0.0409893	0.486484	0.00587401
1	1:99579312	99579312	C	T	0.141	-0.113875	0.0409893	0.486484	0.00587401
1	1:99622121	99622121	G	A	0.141	-0.113875	0.0409893	0.486484	0.00587401
1	1:99674925	99674925	C	T	0.141	-0.113875	0.0409893	0.486484	0.00587401
1	1:99694188	99694188	T	G	0.141	-0.113875	0.0409893	0.486484	0.00587401
1	1:99705360	99705360	T	C	0.141	-0.113875	0.0409893	0.486484	0.00587401
1	1:99707964	99707964	G	A	0.141	-0.113875	0.0409893	0.486484	0.00587401
1	1:99737900	99737900	A	G	0.141	-0.113875	0.0409893	0.486484	0.00587401
1	1:99760275	99760275	A	G	0.141	-0.113875	0.0409893	0.486484	0.00587401
1	1:99765123	99765123	T	C	0.141	-0.113875	0.0409893	0.486484	0.00587401
1	1:99796437	99796437	T	C	0.141	-0.113875	0.0409893	0.486484	0.00587401
1	1:99802402	99802402	A	G	0.141	-0.113875	0.0409893	0.486484	0.00587401
1	1:99842150	99842150	G	T	0.141	-0.113875	0.0409893	0.486484	0.00587401
1	1:99864950	99864950	A	G	0.141	-0.113875	0.0409893	0.486484	0.00587401
1	1:99895514	99895514	C	T	0.141	-0.113875	0.0409893	0.486484	0.00587401
1	1:99911159	99911159	T	C	0.141	-0.113875	0.0409893	0.486484	0.00587401
1	1:100135758	100135758	T	C	0.141	-0.113875	0.0409893	0.486484	0.00587401
1	1:100175114	100175114	T	C	0.141	-0.113875	0.0409893	0.486484	0.00587401
1	1:100188542	100188542	G	A	0.141	-0.113875	0.0409893	0.486484	0.00587401
1	1:101035154	101035154	A	C	0.141	-0.113875	0.0409893	0.486484	0.00587401
19	19:45402914	45402914	G	T	0.277	-0.0911534	0.0323349	0.423836	0.00587808
26	26:32461817	32461817	G	A	0.42	0.0840087	0.029687	0.413377	0.00588982
7	7:78033440	78033440	A	T	0.15	-0.108429	0.0388775	0.457759	0.00589512
28	28:18115703	18115703	C	T	0.43	0.0817943	0.0294747	0.510259	0.00590402
5	5:28089804	28089804	G	C	0.225	0.101246	0.0363937	0.537034	0.00590917
38	38:1410340	1410340	A	G	0.34	-0.0866202	0.0305329	0.407836	0.00590957
38	38:1412697	1412697	T	C	0.34	-0.0866202	0.0305329	0.407836	0.00590957
4	4:87798723	87798723	G	A	0.368	-0.0821614	0.0293378	0.441879	0.00591101
5	5:1881339	1881339	A	G	0.119	-0.132314	0.0446059	0.338222	0.00591664
5	5:1895449	1895449	A	C	0.119	-0.132314	0.0446059	0.338222	0.00591664
5	5:1907292	1907292	A	G	0.119	-0.132314	0.0446059	0.338222	0.00591664
5	5:3024973	3024973	T	C	0.119	-0.132314	0.0446059	0.338222	0.00591664
5	5:3060083	3060083	A	C	0.119	-0.132314	0.0446059	0.338222	0.00591664
16	16:51081125	51081125	G	A	0.128	0.117566	0.0423161	0.476399	0.00591791
5	5:2054262	2054262	G	C	0.248	-0.0984431	0.034067	0.375175	0.00592079
15	15:19012529	19012529	A	T	0.134	0.117129	0.0421586	0.530625	0.00592325
15	15:19016391	19016391	A	G	0.134	0.117129	0.0421586	0.530625	0.00592325
15	15:19027062	19027062	A	C	0.134	0.117129	0.0421586	0.530625	0.00592325
15	15:19034312	19034312	G	A	0.134	0.117129	0.0421586	0.530625	0.00592325
15	15:19045211	19045211	T	C	0.134	0.117129	0.0421586	0.530625	0.00592325
15	15:19085611	19085611	C	T	0.134	0.117129	0.0421586	0.530625	0.00592325
15	15:19085975	19085975	G	A	0.134	0.117129	0.0421586	0.530625	0.00592325
15	15:19235663	19235663	A	G	0.134	0.117129	0.0421586	0.530625	0.00592325
15	15:19236086	19236086	T	C	0.134	0.117129	0.0421586	0.530625	0.00592325
15	15:19238720	19238720	C	A	0.134	0.117129	0.0421586	0.530625	0.00592325
15	15:19410671	19410671	G	A	0.134	0.117129	0.0421586	0.530625	0.00592325
15	15:19492441	19492441	C	T	0.134	0.117129	0.0421586	0.530625	0.00592325
15	15:19522695	19522695	A	G	0.134	0.117129	0.0421586	0.530625	0.00592325
15	15:19570498	19570498	T	C	0.134	0.117129	0.0421586	0.530625	0.00592325
26	26:7921520	7921520	T	C	0.393	0.0872428	0.0314018	0.531109	0.0059275
26	26:7922154	7922154	A	G	0.393	0.0872428	0.0314018	0.531109	0.0059275
26	26:7935240	7935240	T	C	0.393	0.0872428	0.0314018	0.531109	0.0059275
20	20:5590052	5590052	T	C	0.051	0.180695	0.0642475	0.426252	0.00594061
11	11:40330112	40330112	T	A	0.092	-0.137918	0.0485977	0.402907	0.00595237
21	21:47999250	47999250	T	G	0.463	-0.0811507	0.0290535	0.446335	0.00596563
18	18:20917110	20917110	T	C	0.085	-0.143435	0.0514762	0.4554	0.00596847
11	11:38722125	38722125	A	G	0.398	-0.0846226	0.0300572	0.42479	0.00597097
28	28:16639592	16639592	T	G	0.361	-0.0850349	0.0306697	0.520748	0.00597648
5	5:53332368	53332368	A	C	0.129	0.120721	0.0435045	0.475606	0.00597826
16	16:49405003	49405003	A	G	0.365	-0.0840868	0.0303101	0.4791	0.00597866
26	26:8136931	8136931	A	G	0.393	0.0876356	0.0315981	0.524848	0.00597919
22	22:60502010	60502010	G	A	0.193	0.104014	0.0370965	0.431612	0.00597972
5	5:1857246	1857246	G	A	0.248	-0.098434	0.0340857	0.374501	0.00598078
28	28:18759620	18759620	A	G	0.137	0.114064	0.0411518	0.487147	0.00598342
28	28:18761666	18761666	G	A	0.137	0.114064	0.0411518	0.487147	0.00598342
28	28:18765758	18765758	T	C	0.137	0.114064	0.0411518	0.487147	0.00598342
28	28:18814837	18814837	T	C	0.137	0.114064	0.0411518	0.487147	0.00598342
7	7:63160463	63160463	A	G	0.119	-0.125084	0.0450919	0.526663	0.0059852
7	7:63191717	63191717	T	C	0.119	-0.125084	0.0450919	0.526663	0.0059852
[truncated: 8,002 more rows]

## Sheet: Table S1b
Supplementary Table S1b. The 10,000 most significant markers sorted by P value obtained from the genome-wide association study in a subset of younger cases (7 years or less, n=77) and all controls (n=365).
Chromosome	SNP ID	Position	Minor allele	Major allele	Allele frequency	Beta estimates	Standard errors for beta	Restricted maximum likelihood estimates for lambda	P value of score test
11	11:42238647	42238647	C	T	0.363	0.13978	0.0265993	0.761667	1.22071e-06
11	11:42261240	42261240	C	A	0.363	0.13978	0.0265993	0.761667	1.22071e-06
11	11:42213042	42213042	C	T	0.364	0.139287	0.0266663	0.767356	1.3666e-06
11	11:43187883	43187883	A	G	0.38	0.138412	0.0267196	0.735992	2.01702e-06
11	11:43598990	43598990	A	G	0.353	0.13745	0.0269363	0.765478	2.41269e-06
11	11:42198523	42198523	G	A	0.396	0.130747	0.0267646	0.940828	3.20452e-06
11	11:43501947	43501947	G	A	0.411	0.128518	0.0257772	0.795851	3.47682e-06
11	11:43064938	43064938	T	C	0.357	0.13445	0.0270188	0.769035	4.192e-06
11	11:43479473	43479473	G	A	0.422	0.12783	0.0257219	0.765954	4.36488e-06
11	11:41589812	41589812	G	A	0.472	-0.131406	0.0264185	0.761687	4.36702e-06
11	11:43553619	43553619	T	C	0.424	0.12832	0.025867	0.764862	4.58498e-06
11	11:42179479	42179479	C	A	0.43	-0.13091	0.0271886	0.916865	4.6561e-06
11	11:42182650	42182650	A	G	0.43	-0.13091	0.0271886	0.916865	4.6561e-06
11	11:43172809	43172809	G	A	0.369	0.13463	0.0270031	0.742026	4.70256e-06
11	11:39434964	39434964	G	A	0.49	-0.1301	0.0266904	0.830696	4.85635e-06
11	11:41601470	41601470	T	C	0.456	-0.134494	0.0269631	0.730053	4.98903e-06
11	11:42952952	42952952	T	C	0.357	0.132206	0.0268861	0.781938	5.06249e-06
11	11:41230601	41230601	A	G	0.466	-0.129228	0.0271978	0.99497	5.11091e-06
11	11:42101398	42101398	G	A	0.443	-0.127313	0.0266635	0.945114	5.12617e-06
11	11:43483348	43483348	A	G	0.425	0.12683	0.0258201	0.771735	5.48291e-06
11	11:42088118	42088118	T	A	0.428	-0.130437	0.0272931	0.912733	5.5092e-06
11	11:43721145	43721145	G	A	0.37	0.132603	0.0268556	0.745903	5.7135e-06
11	11:41003808	41003808	A	G	0.505	-0.129225	0.0265703	0.800717	5.83519e-06
11	11:40963324	40963324	A	G	0.503	-0.129118	0.0266117	0.804841	6.01999e-06
11	11:40964679	40964679	T	C	0.503	-0.129118	0.0266117	0.804841	6.01999e-06
11	11:41525068	41525068	C	A	0.468	-0.129546	0.0264828	0.766213	6.15847e-06
11	11:40946096	40946096	T	C	0.501	-0.128335	0.0266809	0.802417	7.33469e-06
11	11:42676919	42676919	A	C	0.446	-0.124425	0.0265881	0.948883	7.62911e-06
11	11:41475242	41475242	T	G	0.468	0.12559	0.0256006	0.716308	7.75884e-06
11	11:41525037	41525037	T	C	0.422	-0.129879	0.0277433	0.911928	8.39984e-06
11	11:40777312	40777312	C	T	0.431	-0.131494	0.0278695	0.847112	9.03885e-06
11	11:40782127	40782127	A	G	0.431	-0.131494	0.0278695	0.847112	9.03885e-06
11	11:40784980	40784980	A	G	0.431	-0.131494	0.0278695	0.847112	9.03885e-06
11	11:41137201	41137201	T	C	0.46	0.131044	0.0273547	0.767832	9.67383e-06
11	11:41144469	41144469	G	A	0.46	0.131044	0.0273547	0.767832	9.67383e-06
11	11:40367664	40367664	C	T	0.421	-0.130571	0.027931	0.872495	9.87111e-06
11	11:40370670	40370670	C	T	0.421	-0.130571	0.027931	0.872495	9.87111e-06
11	11:40352759	40352759	C	T	0.42	-0.129317	0.0279097	0.878185	1.15315e-05
11	11:39569914	39569914	C	T	0.495	-0.124939	0.0267973	0.841006	1.16645e-05
11	11:42669763	42669763	A	G	0.443	-0.121592	0.0265717	0.953084	1.17069e-05
11	11:42676131	42676131	G	A	0.443	-0.121592	0.0265717	0.953084	1.17069e-05
11	11:39996002	39996002	C	T	0.457	0.127114	0.0271464	0.814928	1.20851e-05
11	11:41134483	41134483	A	G	0.456	0.130256	0.0274667	0.762629	1.22754e-05
11	11:39732327	39732327	C	T	0.495	-0.124496	0.0267637	0.836158	1.24609e-05
11	11:42641025	42641025	T	C	0.429	-0.123888	0.0270882	0.931396	1.25172e-05
11	11:39855024	39855024	A	G	0.495	-0.125027	0.0268285	0.825612	1.25794e-05
11	11:39607431	39607431	T	G	0.494	-0.123666	0.0267381	0.849069	1.32155e-05
11	11:43064189	43064189	A	G	0.438	-0.121258	0.0265705	0.916668	1.35898e-05
11	11:42641047	42641047	C	A	0.437	-0.12283	0.0269313	0.920435	1.36028e-05
11	11:40005289	40005289	A	G	0.458	-0.126577	0.0268107	0.755254	1.38477e-05
11	11:40112529	40112529	A	C	0.458	0.125614	0.0271	0.821049	1.43807e-05
11	11:40447455	40447455	T	C	0.459	0.126181	0.0272037	0.81584	1.45183e-05
11	11:42885819	42885819	A	G	0.391	0.121834	0.0269285	0.945168	1.48379e-05
11	11:39851658	39851658	A	T	0.476	-0.122825	0.0272137	0.956625	1.5126e-05
11	11:39854465	39854465	C	A	0.476	-0.122825	0.0272137	0.956625	1.5126e-05
11	11:40808098	40808098	G	A	0.475	-0.125291	0.0264598	0.728228	1.52284e-05
11	11:40823710	40823710	C	T	0.475	-0.125291	0.0264598	0.728228	1.52284e-05
11	11:40825748	40825748	G	T	0.475	-0.125291	0.0264598	0.728228	1.52284e-05
11	11:40919691	40919691	T	C	0.443	0.125993	0.027071	0.787464	1.55605e-05
11	11:40920608	40920608	G	T	0.443	0.125993	0.027071	0.787464	1.55605e-05
11	11:40924188	40924188	G	C	0.443	0.125993	0.027071	0.787464	1.55605e-05
11	11:40940614	40940614	G	A	0.443	0.125993	0.027071	0.787464	1.55605e-05
11	11:40953268	40953268	C	T	0.443	0.125993	0.027071	0.787464	1.55605e-05
11	11:41011254	41011254	T	C	0.443	0.125993	0.027071	0.787464	1.55605e-05
11	11:41057665	41057665	C	G	0.443	0.125993	0.027071	0.787464	1.55605e-05
11	11:41069717	41069717	T	C	0.443	0.125993	0.027071	0.787464	1.55605e-05
11	11:41660654	41660654	G	A	0.524	-0.124215	0.0265597	0.755638	1.67596e-05
11	11:41673196	41673196	T	C	0.524	-0.124215	0.0265597	0.755638	1.67596e-05
11	11:41776731	41776731	A	T	0.524	-0.124215	0.0265597	0.755638	1.67596e-05
11	11:41850796	41850796	T	C	0.524	-0.124215	0.0265597	0.755638	1.67596e-05
11	11:42094447	42094447	C	A	0.497	-0.120486	0.0267691	0.919702	1.75672e-05
11	11:39729050	39729050	G	A	0.475	-0.121522	0.0271729	0.960573	1.77834e-05
11	11:39963631	39963631	A	G	0.438	-0.123984	0.0273901	0.881335	1.78191e-05
11	11:42888192	42888192	T	A	0.393	0.12022	0.0268535	0.949371	1.78871e-05
11	11:41611530	41611530	T	C	0.51	-0.126265	0.0268975	0.733052	1.79431e-05
11	11:41548536	41548536	T	C	0.413	-0.123559	0.0271709	0.850121	1.82512e-05
11	11:41148019	41148019	A	G	0.507	-0.124372	0.0278011	0.937071	1.88057e-05
11	11:42674118	42674118	A	G	0.441	-0.125283	0.0269207	0.744002	1.97589e-05
11	11:39707108	39707108	T	C	0.474	-0.1206	0.0272318	0.954465	2.15819e-05
11	11:41040973	41040973	A	G	0.469	-0.126488	0.0273844	0.749863	2.22952e-05
11	11:39868191	39868191	C	T	0.448	0.122205	0.0270456	0.819657	2.36504e-05
11	11:39884429	39884429	A	G	0.448	0.122205	0.0270456	0.819657	2.36504e-05
11	11:39902892	39902892	C	T	0.463	-0.122541	0.0266935	0.751703	2.4674e-05
11	11:39286625	39286625	G	A	0.434	-0.121274	0.0274374	0.916985	2.46908e-05
11	11:41015539	41015539	G	A	0.482	-0.12213	0.0269102	0.783147	2.58873e-05
22	22:60626252	60626252	C	T	0.261	0.1275	0.029021	0.922742	2.64594e-05
22	22:60635641	60635641	C	T	0.261	0.1275	0.029021	0.922742	2.64594e-05
22	22:60674078	60674078	G	A	0.261	0.1275	0.029021	0.922742	2.64594e-05
20	20:49476448	49476448	C	T	0.329	-0.125981	0.0291124	1.08039	2.68647e-05
11	11:39876280	39876280	G	C	0.449	0.120714	0.0269957	0.825627	2.79953e-05
11	11:39299911	39299911	C	T	0.421	-0.122119	0.0277158	0.890133	2.85182e-05
22	22:60638490	60638490	C	A	0.261	0.126122	0.0288777	0.925923	2.91718e-05
11	11:39506978	39506978	A	G	0.45	0.120481	0.0270958	0.831772	3.02021e-05
11	11:39511761	39511761	T	C	0.45	0.120481	0.0270958	0.831772	3.02021e-05
11	11:39514019	39514019	G	T	0.45	0.120481	0.0270958	0.831772	3.02021e-05
11	11:39515290	39515290	C	T	0.45	0.120481	0.0270958	0.831772	3.02021e-05
11	11:42429463	42429463	A	G	0.379	0.120383	0.0266698	0.772698	3.02242e-05
11	11:41532663	41532663	T	C	0.367	-0.122009	0.0282051	0.993449	3.02514e-05
11	11:41562929	41562929	C	A	0.367	-0.122009	0.0282051	0.993449	3.02514e-05
11	11:41561713	41561713	T	C	0.368	-0.121589	0.0281075	0.989245	3.04768e-05
11	11:41583157	41583157	C	T	0.414	-0.12171	0.0278365	0.910115	3.06785e-05
11	11:41586896	41586896	C	A	0.414	-0.12171	0.0278365	0.910115	3.06785e-05
11	11:40851998	40851998	G	A	0.439	-0.119311	0.0272384	0.898415	3.07541e-05
11	11:40864349	40864349	G	T	0.439	-0.119311	0.0272384	0.898415	3.07541e-05
11	11:40871956	40871956	C	T	0.439	-0.119311	0.0272384	0.898415	3.07541e-05
11	11:40968576	40968576	T	G	0.48	-0.121427	0.0269969	0.78191	3.09696e-05
11	11:40975633	40975633	C	G	0.48	-0.121427	0.0269969	0.78191	3.09696e-05
11	11:39994316	39994316	T	C	0.39	-0.124704	0.0279074	0.807138	3.11209e-05
11	11:40873067	40873067	T	C	0.438	-0.119345	0.0273013	0.902634	3.14501e-05
11	11:39260557	39260557	T	C	0.42	-0.120784	0.0276242	0.893922	3.23226e-05
11	11:40876927	40876927	G	A	0.438	-0.118781	0.0272315	0.903169	3.26785e-05
11	11:40880071	40880071	A	G	0.438	-0.118781	0.0272315	0.903169	3.26785e-05
11	11:40883794	40883794	T	C	0.438	-0.118781	0.0272315	0.903169	3.26785e-05
11	11:40910664	40910664	A	C	0.438	-0.118781	0.0272315	0.903169	3.26785e-05
11	11:43576958	43576958	A	G	0.46	-0.110182	0.0253029	0.911054	3.29035e-05
11	11:42444688	42444688	G	T	0.386	0.119268	0.0266424	0.773573	3.51235e-05
20	20:49451562	49451562	C	T	0.325	-0.124252	0.0292312	1.11427	3.59879e-05
11	11:43437859	43437859	T	C	0.449	0.11448	0.0256552	0.777936	3.6574e-05
11	11:43455777	43455777	C	G	0.449	0.11448	0.0256552	0.777936	3.6574e-05
11	11:39925315	39925315	A	T	0.37	-0.123528	0.0286371	0.931861	3.67421e-05
11	11:39926574	39926574	A	G	0.37	-0.123528	0.0286371	0.931861	3.67421e-05
11	11:42435634	42435634	G	A	0.387	0.118764	0.0266461	0.77761	3.72836e-05
11	11:42480533	42480533	A	G	0.387	0.118764	0.0266461	0.77761	3.72836e-05
11	11:40758853	40758853	A	G	0.368	-0.123167	0.0287088	0.950011	3.84253e-05
11	11:40776377	40776377	C	T	0.368	-0.123167	0.0287088	0.950011	3.84253e-05
11	11:39856542	39856542	C	T	0.469	0.118095	0.027528	0.940881	3.92971e-05
11	11:41547206	41547206	A	G	0.363	-0.120826	0.0283629	0.994092	3.93816e-05
11	11:42802865	42802865	A	T	0.415	-0.116615	0.0270838	0.910304	4.01722e-05
11	11:42823733	42823733	A	G	0.415	-0.116615	0.0270838	0.910304	4.01722e-05
11	11:42830592	42830592	T	A	0.415	-0.116615	0.0270838	0.910304	4.01722e-05
11	11:42834387	42834387	C	T	0.415	-0.116615	0.0270838	0.910304	4.01722e-05
11	11:42834505	42834505	G	A	0.415	-0.116615	0.0270838	0.910304	4.01722e-05
11	11:42845119	42845119	A	G	0.415	-0.116615	0.0270838	0.910304	4.01722e-05
11	11:42850705	42850705	T	C	0.415	-0.116615	0.0270838	0.910304	4.01722e-05
11	11:42853780	42853780	G	T	0.415	-0.116615	0.0270838	0.910304	4.01722e-05
11	11:42863441	42863441	A	G	0.415	-0.116615	0.0270838	0.910304	4.01722e-05
11	11:42873216	42873216	T	C	0.415	-0.116615	0.0270838	0.910304	4.01722e-05
11	11:42878412	42878412	C	T	0.415	-0.116615	0.0270838	0.910304	4.01722e-05
11	11:42879665	42879665	C	T	0.415	-0.116615	0.0270838	0.910304	4.01722e-05
22	22:60760134	60760134	T	C	0.287	0.119746	0.0283273	1.07733	4.01931e-05
22	22:60772063	60772063	G	A	0.287	0.119746	0.0283273	1.07733	4.01931e-05
22	22:60774760	60774760	G	A	0.287	0.119746	0.0283273	1.07733	4.01931e-05
22	22:60781069	60781069	A	G	0.287	0.119746	0.0283273	1.07733	4.01931e-05
11	11:42487642	42487642	G	A	0.45	-0.117747	0.026502	0.771513	4.09144e-05
11	11:40134930	40134930	G	T	0.474	-0.119105	0.0276244	0.895461	4.135e-05
4	4:37748075	37748075	T	C	0.222	0.137831	0.0326259	1.05363	4.15069e-05
11	11:39520134	39520134	G	C	0.454	0.118318	0.0271221	0.830269	4.29976e-05
11	11:43161081	43161081	A	G	0.395	0.119998	0.0268654	0.745456	4.35351e-05
29	29:37303240	37303240	T	C	0.201	0.139057	0.0330268	1.25492	4.4854e-05
11	11:43156655	43156655	A	T	0.395	0.118144	0.0266593	0.762893	4.52679e-05
20	20:49435717	49435717	C	G	0.324	-0.123258	0.0294002	1.09524	4.56737e-05
37	37:24039213	24039213	T	C	0.241	0.127301	0.0303988	1.28064	5.05606e-05
37	37:24042060	24042060	A	G	0.241	0.127301	0.0303988	1.28064	5.05606e-05
20	20:49426203	49426203	T	C	0.322	-0.121797	0.0292588	1.12266	5.08648e-05
11	11:40391750	40391750	A	C	0.473	-0.118134	0.0276521	0.87815	5.16329e-05
11	11:40401612	40401612	A	T	0.473	-0.118134	0.0276521	0.87815	5.16329e-05
11	11:40402300	40402300	G	T	0.473	-0.118134	0.0276521	0.87815	5.16329e-05
11	11:40097822	40097822	A	G	0.474	-0.117232	0.0274949	0.88187	5.27019e-05
37	37:24037417	24037417	A	G	0.242	0.126912	0.0303967	1.28609	5.35104e-05
11	11:40205082	40205082	G	A	0.51	-0.117732	0.0268003	0.755156	5.56936e-05
11	11:42977249	42977249	T	C	0.419	0.113683	0.026976	0.919463	5.63357e-05
11	11:40845978	40845978	G	A	0.454	-0.119834	0.0268935	0.709445	5.67274e-05
11	11:42752848	42752848	A	G	0.442	-0.117759	0.0267511	0.740966	5.81717e-05
11	11:40272585	40272585	T	C	0.472	-0.116817	0.0276162	0.883433	5.99676e-05
11	11:39924801	39924801	C	T	0.372	-0.120316	0.0287178	0.931586	6.03842e-05
29	29:37129210	37129210	T	C	0.186	0.139951	0.0339135	1.22245	6.04781e-05
29	29:37132767	37132767	T	C	0.186	0.139951	0.0339135	1.22245	6.04781e-05
11	11:43198757	43198757	A	G	0.423	-0.112498	0.0268441	0.925879	6.07647e-05
20	20:49462669	49462669	G	T	0.321	-0.120596	0.0293454	1.09543	6.32183e-05
37	37:23998044	23998044	A	G	0.281	0.11952	0.0290738	1.21505	6.39384e-05
11	11:42763692	42763692	G	C	0.397	0.116443	0.0267373	0.757899	6.39536e-05
11	11:42434938	42434938	T	C	0.416	-0.113293	0.0272078	0.930294	6.66104e-05
11	11:42439975	42439975	T	C	0.416	-0.113293	0.0272078	0.930294	6.66104e-05
20	20:48547953	48547953	G	A	0.417	-0.113744	0.0278359	1.14559	6.84745e-05
11	11:42444902	42444902	T	C	0.423	-0.111415	0.0269896	0.931768	7.63643e-05
11	11:41252822	41252822	T	C	0.361	-0.116914	0.0284783	0.96623	7.68367e-05
11	11:41256177	41256177	T	C	0.361	-0.116914	0.0284783	0.96623	7.68367e-05
11	11:40190451	40190451	A	G	0.422	-0.116206	0.0277748	0.863646	7.69097e-05
4	4:38119794	38119794	C	T	0.173	0.149324	0.0366231	1.0216	7.70404e-05
4	4:38120407	38120407	G	C	0.173	0.149324	0.0366231	1.0216	7.70404e-05
4	4:38122939	38122939	C	T	0.173	0.149324	0.0366231	1.0216	7.70404e-05
4	4:38124117	38124117	G	A	0.173	0.149324	0.0366231	1.0216	7.70404e-05
4	4:38130974	38130974	G	A	0.173	0.149324	0.0366231	1.0216	7.70404e-05
22	22:60767760	60767760	C	G	0.269	0.118372	0.0291252	1.04699	7.81993e-05
11	11:41137924	41137924	T	C	0.485	-0.11641	0.0281258	0.910647	7.8492e-05
11	11:42712298	42712298	G	A	0.431	0.111616	0.026985	0.906581	7.96565e-05
11	11:42735991	42735991	C	A	0.431	0.111616	0.026985	0.906581	7.96565e-05
11	11:41447098	41447098	C	T	0.359	-0.117319	0.0287314	0.987541	7.99791e-05
22	22:60644782	60644782	C	T	0.287	0.113203	0.0277366	0.984123	8.01221e-05
22	22:60660328	60660328	T	C	0.287	0.113203	0.0277366	0.984123	8.01221e-05
22	22:60666989	60666989	G	A	0.287	0.113203	0.0277366	0.984123	8.01221e-05
11	11:43661361	43661361	A	G	0.521	0.103984	0.0253766	0.958259	8.0585e-05
4	4:37859248	37859248	A	T	0.223	0.13363	0.0328713	1.01251	8.16562e-05
11	11:43569687	43569687	A	G	0.37	-0.112033	0.0273517	0.954272	8.2064e-05
11	11:42883749	42883749	T	A	0.41	-0.11342	0.0274664	0.899037	8.40242e-05
4	4:37552673	37552673	T	C	0.216	0.132153	0.0327235	1.07385	8.44364e-05
11	11:41641512	41641512	A	C	0.5	-0.116123	0.0268883	0.735351	8.52935e-05
20	20:49441410	49441410	G	A	0.313	-0.118198	0.0293316	1.10425	8.57484e-05
4	4:36984122	36984122	G	A	0.21	0.133436	0.0330724	1.07154	8.58424e-05
4	4:37003704	37003704	G	A	0.21	0.133436	0.0330724	1.07154	8.58424e-05
4	4:37057103	37057103	T	G	0.21	0.133436	0.0330724	1.07154	8.58424e-05
11	11:43269715	43269715	T	A	0.462	0.105546	0.0258409	0.95031	8.63372e-05
11	11:39787609	39787609	C	T	0.372	-0.116744	0.0285202	0.93211	8.7905e-05
11	11:39794319	39794319	G	A	0.372	-0.116744	0.0285202	0.93211	8.7905e-05
11	11:39801198	39801198	A	G	0.372	-0.116744	0.0285202	0.93211	8.7905e-05
11	11:41257293	41257293	C	T	0.342	-0.119532	0.0294433	0.981214	8.88252e-05
22	22:60566230	60566230	T	C	0.256	0.118438	0.028995	0.930493	8.89204e-05
11	11:41265486	41265486	C	T	0.345	-0.118374	0.0291103	0.965537	8.95439e-05
11	11:41274170	41274170	A	C	0.345	-0.118374	0.0291103	0.965537	8.95439e-05
11	11:41439503	41439503	A	G	0.345	-0.118374	0.0291103	0.965537	8.95439e-05
11	11:41506007	41506007	T	C	0.345	-0.118374	0.0291103	0.965537	8.95439e-05
11	11:41624538	41624538	A	G	0.465	-0.111459	0.0268516	0.856422	9.0042e-05
11	11:41648808	41648808	A	T	0.465	-0.111459	0.0268516	0.856422	9.0042e-05
11	11:40971401	40971401	G	T	0.467	0.115792	0.0272243	0.767596	9.20075e-05
11	11:40982872	40982872	G	A	0.467	0.115792	0.0272243	0.767596	9.20075e-05
11	11:43192147	43192147	G	T	0.42	-0.10992	0.0269299	0.930263	9.21148e-05
11	11:41570647	41570647	T	C	0.374	-0.118394	0.0282297	0.809771	9.34069e-05
29	29:37068573	37068573	A	G	0.186	0.136491	0.0341132	1.19803	9.66284e-05
29	29:37074320	37074320	A	G	0.186	0.136491	0.0341132	1.19803	9.66284e-05
11	11:40801214	40801214	T	C	0.417	-0.114693	0.0278968	0.872724	9.89037e-05
11	11:40803314	40803314	C	T	0.417	-0.114693	0.0278968	0.872724	9.89037e-05
20	20:49361234	49361234	A	G	0.311	-0.117628	0.0294788	1.14567	9.90646e-05
11	11:41298731	41298731	A	G	0.343	-0.118398	0.0293183	0.963026	0.000100438
11	11:41350277	41350277	G	C	0.343	-0.118398	0.0293183	0.963026	0.000100438
11	11:41354086	41354086	T	C	0.343	-0.118398	0.0293183	0.963026	0.000100438
11	11:41375800	41375800	C	A	0.343	-0.118398	0.0293183	0.963026	0.000100438
11	11:41393054	41393054	C	T	0.343	-0.118398	0.0293183	0.963026	0.000100438
11	11:41050406	41050406	T	C	0.404	-0.116904	0.0283744	0.851466	0.00010417
11	11:41060341	41060341	A	G	0.404	-0.116904	0.0283744	0.851466	0.00010417
11	11:41067470	41067470	A	T	0.404	-0.116904	0.0283744	0.851466	0.00010417
11	11:41078090	41078090	G	A	0.404	-0.116904	0.0283744	0.851466	0.00010417
11	11:41080449	41080449	G	A	0.404	-0.116904	0.0283744	0.851466	0.00010417
11	11:42374433	42374433	T	C	0.422	-0.108871	0.0269652	0.933393	0.000107872
11	11:39807121	39807121	G	T	0.515	-0.112174	0.0266058	0.762797	0.000109026
11	11:42361995	42361995	A	G	0.399	-0.112584	0.0278093	0.912948	0.000110048
11	11:42380380	42380380	T	C	0.426	0.107397	0.0266836	0.944217	0.000110089
11	11:43272660	43272660	C	T	0.464	0.103607	0.0257727	0.949206	0.00011114
11	11:41628471	41628471	G	A	0.451	-0.110936	0.026984	0.839439	0.000113339
22	22:60755128	60755128	T	G	0.249	0.117958	0.029691	1.02724	0.00011365
11	11:42731007	42731007	A	C	0.434	0.108936	0.0269534	0.91044	0.000113891
22	22:60727021	60727021	T	C	0.232	0.121506	0.0304706	0.989431	0.000114023
11	11:41301682	41301682	C	G	0.342	-0.117266	0.0293061	0.966991	0.000114739
11	11:41312828	41312828	A	C	0.342	-0.117266	0.0293061	0.966991	0.000114739
11	11:41314753	41314753	C	T	0.342	-0.117266	0.0293061	0.966991	0.000114739
11	11:41334090	41334090	C	T	0.342	-0.117266	0.0293061	0.966991	0.000114739
11	11:41343691	41343691	G	A	0.342	-0.117266	0.0293061	0.966991	0.000114739
11	11:41395148	41395148	A	C	0.342	-0.117266	0.0293061	0.966991	0.000114739
11	11:41430463	41430463	T	C	0.342	-0.117266	0.0293061	0.966991	0.000114739
11	11:41501631	41501631	A	G	0.342	-0.117266	0.0293061	0.966991	0.000114739
11	11:41522419	41522419	C	A	0.342	-0.117266	0.0293061	0.966991	0.000114739
22	22:60559265	60559265	C	T	0.219	0.124464	0.0306044	0.867373	0.00011619
22	22:60585619	60585619	T	C	0.219	0.124464	0.0306044	0.867373	0.00011619
22	22:60598730	60598730	A	G	0.219	0.124464	0.0306044	0.867373	0.00011619
11	11:42391383	42391383	A	G	0.414	-0.10843	0.0270237	0.939508	0.000116933
11	11:39979644	39979644	G	T	0.354	-0.117121	0.0291421	0.917668	0.000122673
11	11:43508802	43508802	T	C	0.438	-0.102706	0.0255032	0.904312	0.000123033
22	22:60720109	60720109	A	G	0.233	0.120632	0.0304351	0.994029	0.000123957
22	22:60720836	60720836	G	T	0.343	0.103036	0.0262902	1.09078	0.000131478
22	22:60725790	60725790	G	A	0.343	0.103036	0.0262902	1.09078	0.000131478
22	22:60570318	60570318	G	A	0.248	0.118862	0.0299386	0.94015	0.000135036
11	11:41606527	41606527	G	T	0.449	-0.110076	0.0270573	0.837738	0.000135219
11	11:39305139	39305139	A	G	0.473	-0.110012	0.0274178	0.893513	0.000135652
22	22:60455094	60455094	A	G	0.206	0.128069	0.032072	0.907404	0.000136071
11	11:43462079	43462079	C	T	0.437	-0.10168	0.0254765	0.908485	0.000139461
11	11:43518308	43518308	T	C	0.437	-0.10168	0.0254765	0.908485	0.000139461
22	22:60765326	60765326	C	A	0.343	0.102165	0.026222	1.09658	0.00014294
11	11:40074310	40074310	A	G	0.373	-0.116147	0.0283234	0.79679	0.000145594
20	20:49403653	49403653	C	T	0.309	-0.115858	0.0297746	1.08658	0.000146353
20	20:48602465	48602465	A	G	0.403	-0.108577	0.0279158	1.09726	0.000146543
25	25:9132217	9132217	C	T	0.055	0.216247	0.0557624	1.11839	0.000151768
11	11:42389352	42389352	T	C	0.399	-0.10988	0.0277034	0.902764	0.00015571
11	11:40987365	40987365	A	G	0.363	-0.112102	0.0285451	0.956794	0.000155791
22	22:60457820	60457820	C	T	0.208	0.126453	0.0321017	0.928579	0.000157307
11	11:39443951	39443951	C	T	0.386	-0.111397	0.0285131	0.987006	0.00015772
20	20:48747782	48747782	G	A	0.331	-0.110432	0.0285673	1.13669	0.000158522
11	11:39446034	39446034	T	C	0.386	-0.112443	0.0287369	0.97383	0.000158614
11	11:39448409	39448409	G	T	0.386	-0.112443	0.0287369	0.97383	0.000158614
11	11:39469053	39469053	C	T	0.386	-0.112443	0.0287369	0.97383	0.000158614
11	11:39429247	39429247	A	G	0.383	-0.112318	0.028778	0.987957	0.000159811
11	11:39432838	39432838	A	G	0.383	-0.112318	0.028778	0.987957	0.000159811
22	22:60578103	60578103	C	T	0.27	0.112945	0.0289704	0.987366	0.000159907
22	22:60716576	60716576	T	C	0.363	0.100739	0.0260455	1.07415	0.000161119
11	11:39459625	39459625	G	A	0.472	0.110246	0.0270606	0.795583	0.000161558
11	11:39473179	39473179	T	G	0.472	0.110246	0.0270606	0.795583	0.000161558
11	11:40523071	40523071	A	C	0.499	-0.108937	0.0277336	0.9247	0.000169363
11	11:40787722	40787722	T	G	0.351	-0.114651	0.0292314	0.928158	0.0001718
11	11:39655214	39655214	T	C	0.388	-0.11178	0.027661	0.805415	0.000175221
11	11:38956978	38956978	T	C	0.395	-0.108925	0.0282428	1.01551	0.000180681
22	22:60594142	60594142	C	T	0.281	0.107846	0.0278932	0.980773	0.000183076
1	1:93892100	93892100	C	T	0.374	0.109082	0.0283685	1.02644	0.000184971
11	11:43275596	43275596	A	C	0.354	-0.107514	0.0276361	0.935552	0.000189488
11	11:39491109	39491109	T	C	0.458	-0.10808	0.0280472	0.995355	0.0001898
11	11:39493172	39493172	G	A	0.458	-0.10808	0.0280472	0.995355	0.0001898
4	4:37810709	37810709	G	A	0.213	0.129003	0.0336093	1.00392	0.000195963
4	4:37812908	37812908	A	G	0.213	0.129003	0.0336093	1.00392	0.000195963
4	4:37816573	37816573	T	C	0.213	0.129003	0.0336093	1.00392	0.000195963
11	11:43614040	43614040	A	G	0.462	-0.105221	0.0265524	0.838164	0.000201526
22	22:60576096	60576096	C	T	0.232	0.117962	0.0304492	0.915089	0.000207869
20	20:48965976	48965976	A	G	0.314	-0.109204	0.0288021	1.09455	0.000211048
11	11:43311824	43311824	C	T	0.353	-0.106454	0.0276182	0.939255	0.000214583
11	11:43316247	43316247	A	G	0.353	-0.106454	0.0276182	0.939255	0.000214583
11	11:43323141	43323141	C	T	0.354	-0.106149	0.0275241	0.93594	0.000214825
11	11:41200164	41200164	G	C	0.339	-0.11331	0.0294514	0.94167	0.000218892
11	11:41209597	41209597	G	A	0.448	-0.106566	0.0270721	0.827146	0.000235898
11	11:39613780	39613780	G	A	0.511	-0.106013	0.0276349	0.929114	0.00023598
11	11:39244915	39244915	T	C	0.381	-0.108907	0.0286524	0.982442	0.000236383
11	11:43370317	43370317	G	A	0.458	-0.0972808	0.0255532	0.969304	0.000236586
11	11:43379989	43379989	G	T	0.458	-0.0972808	0.0255532	0.969304	0.000236586
11	11:39667750	39667750	C	G	0.512	-0.105743	0.0275479	0.919694	0.000240621
11	11:39247073	39247073	T	A	0.38	-0.10779	0.0285675	0.985614	0.000260196
11	11:39256671	39256671	A	G	0.38	-0.10779	0.0285675	0.985614	0.000260196
11	11:43290639	43290639	A	G	0.351	-0.105181	0.0276526	0.938087	0.000260244
37	37:24176348	24176348	A	C	0.275	0.109196	0.0292994	1.16395	0.000265071
11	11:43280364	43280364	T	C	0.35	-0.105241	0.0277246	0.94085	0.000265727
11	11:43403185	43403185	T	C	0.457	-0.0962239	0.0255158	0.972635	0.000268088
22	22:60609312	60609312	T	G	0.355	0.0985017	0.0263997	1.06429	0.000268865
11	11:43699859	43699859	C	T	0.389	-0.10183	0.0271043	0.997541	0.000269634
1	1:93897684	93897684	G	A	0.411	0.104249	0.0279465	1.05187	0.000273764
4	4:38126871	38126871	A	T	0.179	0.135252	0.0361259	1.00725	0.000276681
20	20:46807248	46807248	T	A	0.411	-0.104756	0.0281741	1.08723	0.000277413
11	11:43377715	43377715	G	A	0.445	-0.0967355	0.0256926	0.948144	0.000290594
11	11:43381098	43381098	G	A	0.445	-0.0967355	0.0256926	0.948144	0.000290594
22	22:60449653	60449653	G	A	0.189	0.125082	0.0330009	0.90874	0.000290883
4	4:36915669	36915669	C	T	0.206	0.125914	0.0338921	1.03109	0.000296025
20	20:46960474	46960474	C	T	0.393	-0.103571	0.0280062	1.08482	0.000298683
11	11:43742625	43742625	T	A	0.348	-0.106152	0.0281558	0.931312	0.000300464
22	22:60722401	60722401	C	T	0.344	0.0966512	0.0262191	1.09558	0.00030965
4	4:37777274	37777274	C	G	0.21	0.124558	0.033594	1.0128	0.000312086
1	1:94165329	94165329	T	C	0.367	0.104798	0.0284997	1.05325	0.000331532
25	25:8379529	8379529	C	T	0.053	0.208292	0.0568349	1.10559	0.000333032
25	25:8674950	8674950	T	C	0.053	0.208292	0.0568349	1.10559	0.000333032
25	25:8701993	8701993	G	A	0.053	0.208292	0.0568349	1.10559	0.000333032
25	25:8711457	8711457	G	T	0.053	0.208292	0.0568349	1.10559	0.000333032
25	25:8721392	8721392	T	G	0.053	0.208292	0.0568349	1.10559	0.000333032
25	25:8731165	8731165	C	T	0.053	0.208292	0.0568349	1.10559	0.000333032
25	25:8757522	8757522	T	A	0.053	0.208292	0.0568349	1.10559	0.000333032
25	25:9011657	9011657	G	A	0.053	0.208292	0.0568349	1.10559	0.000333032
25	25:9066576	9066576	A	G	0.053	0.208292	0.0568349	1.10559	0.000333032
25	25:9071351	9071351	A	G	0.053	0.208292	0.0568349	1.10559	0.000333032
25	25:9074426	9074426	A	C	0.053	0.208292	0.0568349	1.10559	0.000333032
25	25:9091421	9091421	C	T	0.053	0.208292	0.0568349	1.10559	0.000333032
25	25:9099070	9099070	A	G	0.053	0.208292	0.0568349	1.10559	0.000333032
25	25:9119224	9119224	C	A	0.053	0.208292	0.0568349	1.10559	0.000333032
25	25:9140236	9140236	G	A	0.053	0.208292	0.0568349	1.10559	0.000333032
25	25:9151363	9151363	G	A	0.053	0.208292	0.0568349	1.10559	0.000333032
25	25:9151859	9151859	G	A	0.053	0.208292	0.0568349	1.10559	0.000333032
25	25:9152891	9152891	C	A	0.053	0.208292	0.0568349	1.10559	0.000333032
25	25:9161446	9161446	C	T	0.053	0.208292	0.0568349	1.10559	0.000333032
25	25:9166012	9166012	A	G	0.053	0.208292	0.0568349	1.10559	0.000333032
25	25:9170339	9170339	T	C	0.053	0.208292	0.0568349	1.10559	0.000333032
25	25:9183123	9183123	A	G	0.053	0.208292	0.0568349	1.10559	0.000333032
25	25:9188581	9188581	G	A	0.053	0.208292	0.0568349	1.10559	0.000333032
25	25:9292268	9292268	G	C	0.053	0.208292	0.0568349	1.10559	0.000333032
25	25:9292297	9292297	A	G	0.053	0.208292	0.0568349	1.10559	0.000333032
25	25:9295532	9295532	T	G	0.053	0.208292	0.0568349	1.10559	0.000333032
25	25:9344555	9344555	T	C	0.053	0.208292	0.0568349	1.10559	0.000333032
22	22:60621974	60621974	A	T	0.356	0.0958253	0.0261753	1.06209	0.000347364
20	20:49369199	49369199	A	G	0.114	-0.146776	0.0402601	1.17764	0.000356907
20	20:48950665	48950665	G	A	0.331	-0.105406	0.028871	1.06777	0.000357949
20	20:49369984	49369984	C	T	0.114	-0.146671	0.0402531	1.17323	0.000358861
11	11:41112792	41112792	C	T	0.344	-0.109195	0.0293685	0.933888	0.000360077
11	11:41113722	41113722	A	C	0.344	-0.109195	0.0293685	0.933888	0.000360077
4	4:37754737	37754737	G	T	0.213	0.121907	0.0333769	1.03056	0.000371478
11	11:41642756	41642756	T	C	0.44	-0.104149	0.0274126	0.837827	0.000375673
20	20:48975761	48975761	G	A	0.335	-0.10375	0.0285746	1.10917	0.000375688
11	11:40298068	40298068	A	G	0.434	-0.10433	0.0283481	0.971111	0.00037749
11	11:40377864	40377864	T	C	0.434	-0.10433	0.0283481	0.971111	0.00037749
11	11:40388646	40388646	C	T	0.434	-0.10433	0.0283481	0.971111	0.00037749
11	11:39784897	39784897	A	G	0.355	-0.10793	0.0289944	0.913247	0.000378023
22	22:60491246	60491246	A	G	0.19	0.12222	0.0330332	0.901035	0.000415012
22	22:60494708	60494708	T	C	0.19	0.12222	0.0330332	0.901035	0.000415012
22	22:60502010	60502010	G	A	0.19	0.12222	0.0330332	0.901035	0.000415012
22	22:60517108	60517108	T	C	0.19	0.12222	0.0330332	0.901035	0.000415012
22	22:60749494	60749494	A	G	0.304	0.0978142	0.0271173	1.06096	0.000421799
22	22:60706353	60706353	A	G	0.336	0.096683	0.0268368	1.06144	0.000427944
11	11:39227633	39227633	A	G	0.376	-0.103412	0.0284903	0.989815	0.000433799
37	37:27149235	27149235	G	A	0.449	-0.094647	0.0261901	1.01514	0.00043653
20	20:46818994	46818994	C	T	0.413	-0.101612	0.0282904	1.08324	0.000437719
11	11:39362267	39362267	T	C	0.368	-0.106844	0.0281423	0.806133	0.000442011
22	22:60600714	60600714	C	T	0.354	0.0951641	0.0265129	1.06388	0.000447654
22	22:60601217	60601217	G	A	0.354	0.0951641	0.0265129	1.06388	0.000447654
22	22:60602473	60602473	T	C	0.354	0.0951641	0.0265129	1.06388	0.000447654
22	22:60465427	60465427	G	A	0.191	0.121023	0.032975	0.90686	0.000453923
11	11:41090440	41090440	T	C	0.343	-0.107259	0.0293623	0.932094	0.000458129
11	11:41093697	41093697	G	A	0.343	-0.107259	0.0293623	0.932094	0.000458129
11	11:41095704	41095704	T	C	0.343	-0.107259	0.0293623	0.932094	0.000458129
11	11:41659729	41659729	T	C	0.428	-0.103552	0.027499	0.822331	0.000458266
11	11:41663977	41663977	T	C	0.428	-0.103552	0.027499	0.822331	0.000458266
11	11:41665312	41665312	C	T	0.428	-0.103552	0.027499	0.822331	0.000458266
11	11:41675274	41675274	T	C	0.428	-0.103552	0.027499	0.822331	0.000458266
20	20:46982388	46982388	C	G	0.396	-0.100703	0.0281424	1.07546	0.000461424
4	4:36976685	36976685	A	G	0.204	0.121541	0.0338866	1.03879	0.000464724
11	11:42072034	42072034	C	A	0.408	-0.101488	0.0280963	0.984244	0.000466542
11	11:42074421	42074421	A	T	0.408	-0.101488	0.0280963	0.984244	0.000466542
22	22:60705459	60705459	T	C	0.337	0.0958992	0.0268325	1.0617	0.00047349
1	1:94574133	94574133	C	G	0.331	0.102897	0.0287683	1.05201	0.000475222
20	20:6800841	6800841	T	G	0.055	0.194005	0.0540326	1.00119	0.000483329
22	22:60488465	60488465	T	C	0.191	0.120599	0.0330286	0.907716	0.000484235
11	11:38657464	38657464	T	C	0.424	-0.0997221	0.027415	0.927893	0.000488214
25	25:9183356	9183356	G	A	0.054	0.200202	0.0563034	1.11139	0.000489762
20	20:46779740	46779740	A	G	0.412	-0.10064	0.0282866	1.08619	0.000492416
20	20:46791114	46791114	T	C	0.412	-0.10064	0.0282866	1.08619	0.000492416
20	20:46801600	46801600	C	T	0.412	-0.10064	0.0282866	1.08619	0.000492416
20	20:46817281	46817281	G	A	0.412	-0.10064	0.0282866	1.08619	0.000492416
20	20:46821949	46821949	C	G	0.412	-0.10064	0.0282866	1.08619	0.000492416
20	20:46936332	46936332	A	G	0.412	-0.10064	0.0282866	1.08619	0.000492416
20	20:46945802	46945802	T	C	0.412	-0.10064	0.0282866	1.08619	0.000492416
4	4:53143967	53143967	G	A	0.396	-0.101185	0.0284257	1.07536	0.000493394
20	20:48488764	48488764	G	A	0.364	-0.101912	0.0287085	1.13517	0.000497786
36	36:27238312	27238312	A	G	0.193	-0.118223	0.0331289	1.02575	0.000502192
20	20:48539910	48539910	G	C	0.365	-0.101155	0.0285232	1.12821	0.000504286
20	20:46987563	46987563	C	T	0.411	-0.100507	0.0284033	1.09425	0.000524515
20	20:46988866	46988866	T	A	0.411	-0.100507	0.0284033	1.09425	0.000524515
36	36:27227904	27227904	T	C	0.192	-0.117699	0.0331358	1.03104	0.000528747
11	11:42068183	42068183	G	T	0.407	-0.1003	0.028059	0.987587	0.000529509
20	20:46303298	46303298	T	C	0.394	-0.100071	0.0282852	1.07395	0.000532809
11	11:39232451	39232451	C	T	0.374	-0.101523	0.0284271	0.984921	0.000539222
4	4:37957314	37957314	T	C	0.207	0.11991	0.0337063	1.00665	0.00053954
4	4:37961765	37961765	C	T	0.207	0.11991	0.0337063	1.00665	0.00053954
4	4:37966180	37966180	G	A	0.207	0.11991	0.0337063	1.00665	0.00053954
22	22:60725183	60725183	A	G	0.279	0.100223	0.0282923	1.04268	0.000540452
37	37:24725645	24725645	A	G	0.324	0.101002	0.0282125	0.96275	0.000541614
22	22:60382875	60382875	G	A	0.202	0.116361	0.032516	0.962835	0.000542686
11	11:39272712	39272712	A	G	0.364	-0.105446	0.0282454	0.810332	0.000548082
11	11:39293043	39293043	T	G	0.364	-0.105446	0.0282454	0.810332	0.000548082
20	20:46422045	46422045	T	C	0.42	-0.0989572	0.0280895	1.07158	0.000562523
20	20:46470323	46470323	G	T	0.42	-0.0989572	0.0280895	1.07158	0.000562523
37	37:24116874	24116874	G	A	0.268	0.10277	0.0292416	1.20523	0.000575581
37	37:24121019	24121019	G	C	0.268	0.10277	0.0292416	1.20523	0.000575581
4	4:37869704	37869704	A	G	0.208	0.119049	0.0336729	1.0126	0.000577458
11	11:38649531	38649531	A	G	0.403	-0.0985389	0.0279861	1.03524	0.000590626
20	20:48645793	48645793	C	T	0.308	-0.101116	0.0289062	1.16201	0.00059783
20	20:48648960	48648960	A	G	0.308	-0.101116	0.0289062	1.16201	0.00059783
11	11:38954904	38954904	T	C	0.356	-0.102484	0.0286956	0.940381	0.000599305
4	4:37746459	37746459	C	T	0.235	0.112489	0.0320897	1.037	0.0006199
20	20:46419960	46419960	T	C	0.417	-0.0982399	0.0281447	1.08546	0.000623428
37	37:24112089	24112089	A	G	0.269	0.101703	0.0291236	1.21317	0.000625697
22	22:60355467	60355467	G	A	0.204	0.114918	0.0324943	0.96393	0.000628001
36	36:27201217	27201217	G	A	0.196	-0.115105	0.0329457	1.04695	0.000636116
30	30:9173477	9173477	T	C	0.232	0.116972	0.0333126	1.00005	0.000642633
30	30:9199930	9199930	C	T	0.232	0.116972	0.0333126	1.00005	0.000642633
37	37:24719038	24719038	C	G	0.328	0.0994535	0.028258	0.980732	0.000645339
4	4:37277220	37277220	C	T	0.232	0.113859	0.032675	1.04781	0.000658045
4	4:37285293	37285293	G	C	0.232	0.113859	0.032675	1.04781	0.000658045
1	1:94828951	94828951	G	A	0.416	0.0970935	0.0278465	1.04004	0.0006601
20	20:48678013	48678013	C	G	0.307	-0.101107	0.029152	1.15156	0.000661711
20	20:48719106	48719106	C	T	0.307	-0.101107	0.029152	1.15156	0.000661711
20	20:48720453	48720453	A	T	0.307	-0.101107	0.029152	1.15156	0.000661711
20	20:48726723	48726723	A	G	0.307	-0.101107	0.029152	1.15156	0.000661711
20	20:48748924	48748924	C	T	0.307	-0.101107	0.029152	1.15156	0.000661711
11	11:39526452	39526452	T	G	0.423	-0.0983326	0.0276744	0.926571	0.000667307
11	11:39320039	39320039	C	T	0.433	-0.0988615	0.027113	0.834614	0.000672264
11	11:38591241	38591241	C	G	0.486	-0.097033	0.0271541	0.898226	0.000674001
37	37:28015935	28015935	G	A	0.376	-0.0979552	0.0280551	1.0053	0.000680166
1	1:94627343	94627343	A	G	0.416	0.0979197	0.028136	1.03199	0.000682055
11	11:38423215	38423215	C	T	0.491	-0.0954905	0.0270086	0.937997	0.000682336
11	11:39627902	39627902	T	C	0.371	-0.102719	0.0279693	0.808826	0.000690604
22	22:60682376	60682376	C	T	0.299	0.0964987	0.02775	1.02171	0.000696241
22	22:60702114	60702114	A	G	0.299	0.0964987	0.02775	1.02171	0.000696241
30	30:9160905	9160905	T	C	0.233	0.115554	0.0331644	1.00574	0.000699215
11	11:41744694	41744694	T	C	0.394	-0.0992672	0.0282832	0.961371	0.000706137
4	4:53139923	53139923	T	C	0.399	-0.0984152	0.0284556	1.0642	0.000708209
4	4:53141045	53141045	C	T	0.399	-0.0984152	0.0284556	1.0642	0.000708209
4	4:53141491	53141491	C	T	0.399	-0.0984152	0.0284556	1.0642	0.000708209
4	4:53317981	53317981	C	T	0.399	-0.0984152	0.0284556	1.0642	0.000708209
21	21:7267890	7267890	G	C	0.288	-0.10431	0.0299144	0.991313	0.000709037
4	4:36750905	36750905	C	T	0.206	0.117404	0.0338746	1.03635	0.000711479
11	11:39643190	39643190	C	T	0.442	-0.0982226	0.0269483	0.823405	0.000712393
25	25:8390971	8390971	C	T	0.084	0.156864	0.0454847	1.0998	0.000714129
11	11:39695032	39695032	A	T	0.371	-0.103067	0.0280627	0.800625	0.000720109
4	4:35681345	35681345	T	C	0.365	0.104332	0.0302473	1.2084	0.000721522
1	1:94305222	94305222	G	A	0.367	0.0969052	0.0281035	1.07343	0.000729123
20	20:48662460	48662460	C	T	0.299	-0.100124	0.0291162	1.16747	0.000734666
20	20:48669452	48669452	C	A	0.299	-0.100124	0.0291162	1.16747	0.000734666
11	11:39466011	39466011	C	T	0.438	-0.0985874	0.0282013	0.964785	0.000737033
36	36:13674381	13674381	T	C	0.16	-0.128885	0.0373323	1.04347	0.000738308
39	39:73672737	73672737	C	T	0.14	0.101934	0.0296057	1.21206	0.000742205
1	1:94453832	94453832	A	G	0.329	0.0998226	0.0289755	1.05388	0.000750656
20	20:5855691	5855691	T	C	0.127	0.135402	0.0387933	0.956146	0.000753321
22	22:60551247	60551247	A	G	0.269	0.0988457	0.02833	0.95574	0.000758104
22	22:60461338	60461338	T	C	0.292	0.0962681	0.027918	1.02666	0.000764532
37	37:24715459	24715459	G	A	0.524	0.0977608	0.0280034	0.949728	0.00076572
37	37:27015403	27015403	C	A	0.474	0.0884725	0.0257095	1.04409	0.000768444
11	11:39589760	39589760	A	T	0.351	-0.10206	0.0289293	0.907334	0.000774933
11	11:39597535	39597535	T	C	0.351	-0.10206	0.0289293	0.907334	0.000774933
26	26:11949434	11949434	A	G	0.407	0.0963741	0.0281514	1.10709	0.000776478
1	1:120627589	120627589	C	G	0.303	0.0943609	0.0274799	1.04706	0.000782862
20	20:46673844	46673844	C	T	0.415	-0.0965033	0.0281873	1.07919	0.000788453
11	11:39155602	39155602	C	A	0.446	-0.0961293	0.0278537	1.00263	0.000793033
20	20:48657454	48657454	G	A	0.331	-0.0990214	0.0289923	1.11153	0.000796618
22	22:60462820	60462820	G	A	0.292	0.0951971	0.0277171	1.02422	0.000804023
20	20:49220851	49220851	C	T	0.107	-0.140276	0.0411432	1.18471	0.000817702
11	11:39529296	39529296	T	C	0.422	-0.0966014	0.0276178	0.923347	0.000818633
25	25:9568798	9568798	G	A	0.055	0.192621	0.0565072	1.09933	0.000819086
22	22:60439175	60439175	T	C	0.238	0.105008	0.0306549	1.03184	0.000819282
1	1:94406267	94406267	G	A	0.329	0.0995956	0.0290988	1.03763	0.000826411
1	1:94409451	94409451	T	C	0.329	0.0995956	0.0290988	1.03763	0.000826411
1	1:94418070	94418070	G	A	0.329	0.0995956	0.0290988	1.03763	0.000826411
1	1:94419974	94419974	G	A	0.329	0.0995956	0.0290988	1.03763	0.000826411
1	1:94435328	94435328	G	A	0.329	0.0995956	0.0290988	1.03763	0.000826411
1	1:94436880	94436880	G	A	0.329	0.0995956	0.0290988	1.03763	0.000826411
1	1:94446622	94446622	T	C	0.329	0.0995956	0.0290988	1.03763	0.000826411
1	1:94470931	94470931	T	C	0.329	0.0995956	0.0290988	1.03763	0.000826411
1	1:94563754	94563754	G	C	0.329	0.0995956	0.0290988	1.03763	0.000826411
29	29:39109203	39109203	T	G	0.46	0.0899015	0.0260798	0.981449	0.000829761
29	29:39112055	39112055	C	G	0.46	0.0899015	0.0260798	0.981449	0.000829761
11	11:39633814	39633814	A	G	0.351	-0.101333	0.028852	0.903037	0.000830412
11	11:39651104	39651104	A	G	0.351	-0.101333	0.028852	0.903037	0.000830412
11	11:39682220	39682220	G	A	0.351	-0.101333	0.028852	0.903037	0.000830412
11	11:39166109	39166109	G	A	0.442	-0.0954508	0.0268857	0.858725	0.000850121
29	29:39235130	39235130	G	A	0.417	0.0917869	0.0264309	0.922118	0.00087824
1	1:93509044	93509044	T	C	0.432	0.0947755	0.0278891	1.04681	0.00088721
1	1:93512419	93512419	T	C	0.432	0.0947755	0.0278891	1.04681	0.00088721
1	1:93535420	93535420	A	C	0.432	0.0947755	0.0278891	1.04681	0.00088721
1	1:93561590	93561590	A	C	0.432	0.0947755	0.0278891	1.04681	0.00088721
1	1:93568856	93568856	A	G	0.432	0.0947755	0.0278891	1.04681	0.00088721
11	11:43679160	43679160	T	G	0.364	-0.0949291	0.0277627	0.997382	0.000893401
11	11:43705610	43705610	G	A	0.364	-0.0949291	0.0277627	0.997382	0.000893401
11	11:43742727	43742727	A	G	0.364	-0.0949291	0.0277627	0.997382	0.000893401
11	11:38724569	38724569	C	T	0.469	-0.092978	0.0273257	1.02844	0.000897618
11	11:38724741	38724741	C	T	0.469	-0.092978	0.0273257	1.02844	0.000897618
1	1:94393835	94393835	C	A	0.33	0.0982231	0.0289534	1.04442	0.000908514
1	1:94398528	94398528	G	C	0.33	0.0982231	0.0289534	1.04442	0.000908514
22	22:60707652	60707652	G	C	0.372	0.0873239	0.0257734	1.04683	0.000915769
23	23:48996103	48996103	T	C	0.074	0.17101	0.0504374	1.03165	0.000921751
21	21:4878523	4878523	A	G	0.31	-0.0982932	0.0286939	0.965245	0.000924531
1	1:93517820	93517820	A	T	0.432	0.0942485	0.0278411	1.04928	0.0009247
1	1:93580346	93580346	A	C	0.432	0.094519	0.0279057	1.04273	0.000926141
20	20:49046921	49046921	C	T	0.101	-0.142942	0.0424655	1.1529	0.000938428
20	20:49052455	49052455	G	A	0.101	-0.142942	0.0424655	1.1529	0.000938428
20	20:48977765	48977765	A	G	0.298	-0.0996686	0.0295323	1.06004	0.000944041
1	1:94588250	94588250	T	C	0.33	0.0986245	0.0291478	1.03769	0.000944186
1	1:94612412	94612412	A	G	0.33	0.0986245	0.0291478	1.03769	0.000944186
1	1:94616318	94616318	A	G	0.33	0.0986245	0.0291478	1.03769	0.000944186
1	1:94624516	94624516	A	G	0.33	0.0986245	0.0291478	1.03769	0.000944186
1	1:94632821	94632821	T	C	0.33	0.0986245	0.0291478	1.03769	0.000944186
29	29:39075186	39075186	A	G	0.463	0.088483	0.0260204	0.995239	0.000948446
20	20:46383182	46383182	T	C	0.421	-0.0948048	0.0281229	1.06939	0.000950178
29	29:38680024	38680024	C	T	0.313	0.0942806	0.0280421	1.15544	0.000951344
11	11:43593717	43593717	T	C	0.352	-0.0953171	0.0280101	0.990569	0.000956549
39	39:87344737	87344737	A	G	0.399	0.0739546	0.0220127	1.15267	0.000959055
39	39:87359743	87359743	A	G	0.399	0.0739546	0.0220127	1.15267	0.000959055
20	20:49883655	49883655	A	G	0.224	-0.111289	0.0330567	1.06816	0.000963848
20	20:49738522	49738522	C	T	0.225	-0.110921	0.0329861	1.04852	0.000995049
20	20:49754142	49754142	A	G	0.225	-0.110921	0.0329861	1.04852	0.000995049
1	1:94820358	94820358	A	C	0.33	0.0969095	0.0288005	1.03483	0.00101021
1	1:94823636	94823636	T	C	0.33	0.0969095	0.0288005	1.03483	0.00101021
1	1:94823780	94823780	T	C	0.33	0.0969095	0.0288005	1.03483	0.00101021
1	1:94825795	94825795	A	G	0.33	0.0969095	0.0288005	1.03483	0.00101021
1	1:94825993	94825993	G	A	0.33	0.0969095	0.0288005	1.03483	0.00101021
1	1:94828545	94828545	A	G	0.33	0.0969095	0.0288005	1.03483	0.00101021
20	20:49355696	49355696	A	G	0.101	-0.142131	0.042516	1.15585	0.00101475
11	11:39888383	39888383	G	A	0.432	-0.097549	0.0274013	0.813148	0.00101622
37	37:24707411	24707411	A	G	0.347	0.091342	0.0271602	1.02747	0.00102191
29	29:38723792	38723792	A	G	0.308	0.0942309	0.0282109	1.12928	0.00102385
20	20:46292321	46292321	G	T	0.413	-0.0939665	0.0280658	1.0719	0.00102516
4	4:36482086	36482086	T	G	0.359	0.100538	0.03001	1.2279	0.00102663
20	20:46291609	46291609	C	T	0.414	-0.0936147	0.0279565	1.06705	0.0010276
1	1:94667504	94667504	C	A	0.33	0.0975054	0.0290176	1.03096	0.00103154
37	37:24787846	24787846	T	C	0.405	0.090054	0.0264994	0.956806	0.001036
22	22:60469197	60469197	G	A	0.196	0.109885	0.0322267	0.938376	0.00103725
20	20:45794369	45794369	C	T	0.334	-0.0968021	0.0289957	1.10485	0.00103741
14	14:35493234	35493234	T	C	0.497	0.0870936	0.0260828	1.19725	0.00104444
20	20:46386067	46386067	A	G	0.413	-0.0943756	0.0282387	1.07112	0.00104651
20	20:46396052	46396052	T	A	0.419	-0.0940851	0.0281794	1.08278	0.00104877
29	29:39197229	39197229	T	A	0.42	0.0899261	0.0263963	0.933596	0.00106656
11	11:41217026	41217026	C	T	0.394	-0.0963677	0.0283183	0.944423	0.00106707
21	21:4972226	4972226	C	T	0.309	-0.0969401	0.0286949	0.965405	0.00108636
21	21:4997956	4997956	C	T	0.309	-0.0969401	0.0286949	0.965405	0.00108636
21	21:5108428	5108428	G	A	0.309	-0.0969401	0.0286949	0.965405	0.00108636
21	21:18375798	18375798	A	G	0.169	0.118208	0.0355927	1.13572	0.00109096
30	30:12784950	12784950	C	A	0.23	0.112741	0.0337746	1.03796	0.00109912
30	30:12809266	12809266	T	C	0.23	0.112741	0.0337746	1.03796	0.00109912
30	30:12924111	12924111	A	G	0.23	0.112741	0.0337746	1.03796	0.00109912
30	30:12938478	12938478	A	G	0.23	0.112741	0.0337746	1.03796	0.00109912
1	1:94531334	94531334	G	A	0.364	0.0945755	0.0284115	1.06338	0.00110395
22	22:60366350	60366350	T	C	0.186	0.11301	0.0335256	0.966055	0.00110725
29	29:38719560	38719560	C	T	0.31	0.0937824	0.0282929	1.14328	0.00111445
12	12:70608166	70608166	T	C	0.296	-0.100598	0.0303407	1.11505	0.00111488
37	37:27732874	27732874	C	T	0.485	-0.0902678	0.0262753	0.885241	0.0011164
25	25:9642190	9642190	T	G	0.057	0.185335	0.0558916	1.09622	0.00112231
1	1:94455905	94455905	C	T	0.395	0.0957797	0.0286469	1.0097	0.00112546
12	12:70364935	70364935	T	G	0.118	-0.137105	0.0413992	1.12382	0.00112707
37	37:27170323	27170323	A	G	0.284	0.0947813	0.0283314	1.00102	0.00113308
1	1:95005782	95005782	A	G	0.417	0.0928405	0.0279703	1.06577	0.00113628
14	14:33091302	33091302	G	A	0.454	-0.0862423	0.0260628	1.17038	0.00114109
14	14:33091354	33091354	A	T	0.454	-0.0862423	0.0260628	1.17038	0.00114109
21	21:5018349	5018349	T	C	0.308	-0.0963705	0.028682	0.971293	0.00114127
21	21:2438393	2438393	A	G	0.309	-0.0966825	0.0287124	0.956778	0.00115171
29	29:38703354	38703354	A	G	0.316	0.09267	0.0280752	1.15347	0.00116837
22	22:60600473	60600473	C	T	0.293	0.0911402	0.0272841	0.992486	0.00116837
22	22:60602058	60602058	G	A	0.293	0.0911402	0.0272841	0.992486	0.00116837
22	22:60485434	60485434	A	C	0.222	0.103619	0.0309439	0.972267	0.00118256
11	11:25232580	25232580	A	G	0.294	-0.099687	0.0297581	0.97041	0.00118531
11	11:25246965	25246965	A	G	0.294	-0.099687	0.0297581	0.97041	0.00118531
11	11:25247102	25247102	G	A	0.294	-0.099687	0.0297581	0.97041	0.00118531
20	20:46363932	46363932	C	G	0.395	-0.0934527	0.0282763	1.0695	0.00118621
1	1:95175792	95175792	G	A	0.452	0.0916882	0.0278068	1.0857	0.00120356
1	1:94907525	94907525	T	C	0.416	0.0923049	0.0279227	1.05201	0.0012054
1	1:94932024	94932024	G	A	0.416	0.0923049	0.0279227	1.05201	0.0012054
11	11:39893762	39893762	C	T	0.412	-0.0954079	0.028083	0.908714	0.001214
11	11:25234262	25234262	A	G	0.293	-0.0990196	0.0297041	0.979737	0.00122759
21	21:5111542	5111542	C	T	0.308	-0.0956986	0.0286649	0.968675	0.0012338
1	1:94940111	94940111	G	A	0.419	0.0918667	0.0278966	1.0704	0.00123476
22	22:60387400	60387400	T	C	0.234	0.102132	0.0308767	1.02317	0.00123753
21	21:5138424	5138424	A	T	0.314	-0.0949763	0.0286332	1.00441	0.00123766
21	21:5338125	5338125	G	A	0.314	-0.0949763	0.0286332	1.00441	0.00123766
21	21:5379306	5379306	A	T	0.314	-0.0949763	0.0286332	1.00441	0.00123766
17	17:41787122	41787122	T	C	0.521	0.0882767	0.026693	1.02609	0.00123794
26	26:11946161	11946161	A	G	0.382	0.0935942	0.0284286	1.06792	0.00123867
26	26:11971665	11971665	G	A	0.382	0.0935942	0.0284286	1.06792	0.00123867
7	7:63548062	63548062	T	C	0.474	0.0914955	0.027827	1.08217	0.00124443
11	11:38442584	38442584	T	C	0.374	-0.0925909	0.0276616	0.956256	0.00124542
11	11:38468951	38468951	A	C	0.374	-0.0925909	0.0276616	0.956256	0.00124542
26	26:10836847	10836847	G	A	0.471	-0.089399	0.0271614	1.0641	0.00124721
19	19:35643010	35643010	T	C	0.29	0.0929975	0.0282671	1.06051	0.00125954
20	20:46214021	46214021	T	G	0.36	-0.0933262	0.0284749	1.14107	0.00126149
26	26:10764629	10764629	T	G	0.421	0.0914175	0.0278475	1.08621	0.00126172
20	20:49357031	49357031	C	G	0.101	-0.139102	0.0424428	1.13675	0.00126177
21	21:7739922	7739922	G	A	0.398	-0.0907955	0.0274654	1.01607	0.00126317
26	26:10801722	10801722	T	C	0.425	0.0910868	0.0277253	1.07079	0.00126562
26	26:10825801	10825801	G	A	0.425	0.0910868	0.0277253	1.07079	0.00126562
22	22:60358487	60358487	A	G	0.187	0.11151	0.0335046	0.967505	0.00127521
11	11:38586644	38586644	T	A	0.37	-0.0946236	0.0280973	0.921879	0.00127714
23	23:49026003	49026003	A	G	0.064	0.178653	0.0541748	1.01654	0.00128796
37	37:3132523	3132523	C	T	0.458	0.0884497	0.0268733	1.03629	0.00128811
22	22:60550330	60550330	T	C	0.303	0.0920304	0.0281094	1.09541	0.00129055
39	39:87414946	87414946	C	T	0.404	0.0719382	0.0219978	1.16433	0.00129595
1	1:94922304	94922304	T	G	0.417	0.0912998	0.0278192	1.05839	0.00129622
1	1:94924735	94924735	C	T	0.417	0.0912998	0.0278192	1.05839	0.00129622
1	1:94937020	94937020	G	A	0.417	0.0912998	0.0278192	1.05839	0.00129622
1	1:94962376	94962376	T	C	0.417	0.0912998	0.0278192	1.05839	0.00129622
1	1:94965532	94965532	C	A	0.417	0.0912998	0.0278192	1.05839	0.00129622
1	1:95000757	95000757	C	T	0.417	0.0912998	0.0278192	1.05839	0.00129622
1	1:95014564	95014564	T	C	0.417	0.0912998	0.0278192	1.05839	0.00129622
1	1:95017312	95017312	A	G	0.417	0.0912998	0.0278192	1.05839	0.00129622
1	1:95019845	95019845	C	T	0.417	0.0912998	0.0278192	1.05839	0.00129622
1	1:95021867	95021867	C	G	0.417	0.0912998	0.0278192	1.05839	0.00129622
1	1:95026442	95026442	T	C	0.417	0.0912998	0.0278192	1.05839	0.00129622
1	1:95045645	95045645	G	A	0.417	0.0912998	0.0278192	1.05839	0.00129622
1	1:95062661	95062661	G	A	0.417	0.0912998	0.0278192	1.05839	0.00129622
22	22:60432256	60432256	A	G	0.252	0.0992589	0.0301739	1.03052	0.00129882
11	11:38677996	38677996	C	A	0.373	-0.0923791	0.0277051	0.953365	0.0013111
12	12:70281179	70281179	C	T	0.103	-0.14462	0.0442253	1.0915	0.00131118
12	12:70281430	70281430	G	A	0.103	-0.14462	0.0442253	1.0915	0.00131118
20	20:6760793	6760793	A	G	0.053	0.182766	0.0551613	0.979212	0.00131301
20	20:6788859	6788859	G	C	0.053	0.182766	0.0551613	0.979212	0.00131301
11	11:39238924	39238924	C	G	0.337	-0.0977149	0.0290885	0.924137	0.00131318
1	1:94648590	94648590	C	T	0.331	0.0956744	0.0290726	1.02347	0.00131595
1	1:94660981	94660981	A	G	0.331	0.0956744	0.0290726	1.02347	0.00131595
21	21:16985870	16985870	A	G	0.192	0.112973	0.0345863	1.17765	0.0013176
4	4:35719313	35719313	G	T	0.364	0.0992927	0.0303899	1.1949	0.00132297
4	4:35723382	35723382	A	G	0.364	0.0992927	0.0303899	1.1949	0.00132297
4	4:35900216	35900216	T	C	0.19	0.113453	0.0346702	1.06594	0.00132676
4	4:35904536	35904536	A	G	0.19	0.113453	0.0346702	1.06594	0.00132676
25	25:8408810	8408810	T	C	0.057	0.183061	0.0560263	1.08411	0.00132869
1	1:94503055	94503055	G	A	0.396	0.0945713	0.0287006	1.00662	0.0013304
21	21:7718244	7718244	T	G	0.397	-0.0900948	0.0274072	1.02192	0.00133172
4	4:53365487	53365487	G	A	0.396	-0.0933187	0.0284948	1.04053	0.00135163
4	4:53378020	53378020	T	C	0.396	-0.0933187	0.0284948	1.04053	0.00135163
20	20:48652224	48652224	A	G	0.295	-0.096346	0.0295905	1.13014	0.00135508
20	20:48652370	48652370	G	T	0.295	-0.096346	0.0295905	1.13014	0.00135508
20	20:48652669	48652669	A	G	0.295	-0.096346	0.0295905	1.13014	0.00135508
17	17:40573294	40573294	T	C	0.44	0.0889016	0.0272187	1.05415	0.00136987
1	1:94782945	94782945	A	T	0.367	0.0919208	0.0281643	1.06364	0.00137093
7	7:63620764	63620764	C	T	0.475	0.0900595	0.0276608	1.09418	0.00137373
4	4:53242463	53242463	A	C	0.39	-0.0943714	0.0287872	1.02001	0.00137405
11	11:39865458	39865458	A	G	0.325	0.0956021	0.0287557	0.946488	0.00137814
20	20:46682070	46682070	G	T	0.403	-0.0916338	0.028149	1.08958	0.00137926
4	4:29526383	29526383	A	G	0.139	0.130627	0.0399185	1.02828	0.00138423
4	4:29546651	29546651	C	G	0.139	0.130627	0.0399185	1.02828	0.00138423
4	4:29550198	29550198	A	C	0.139	0.130627	0.0399185	1.02828	0.00138423
4	4:29561049	29561049	T	C	0.139	0.130627	0.0399185	1.02828	0.00138423
4	4:29564146	29564146	A	G	0.139	0.130627	0.0399185	1.02828	0.00138423
27	27:14129147	14129147	C	T	0.357	-0.0929977	0.0281696	1.32951	0.00138532
21	21:18485728	18485728	A	G	0.183	0.11032	0.0339716	1.16474	0.00139707
21	21:18486530	18486530	A	G	0.183	0.11032	0.0339716	1.16474	0.00139707
22	22:60360804	60360804	T	C	0.188	0.110417	0.0335307	0.97799	0.00140266
14	14:30495315	30495315	A	T	0.481	0.0864949	0.0266387	1.1	0.00140958
23	23:48817695	48817695	T	G	0.069	0.172406	0.052765	1.011	0.00143685
4	4:36255028	36255028	G	C	0.36	0.097415	0.0300343	1.20685	0.0014416
4	4:36323412	36323412	A	G	0.36	0.097415	0.0300343	1.20685	0.0014416
4	4:36331408	36331408	C	T	0.36	0.097415	0.0300343	1.20685	0.0014416
4	4:36333434	36333434	A	G	0.36	0.097415	0.0300343	1.20685	0.0014416
4	4:36338090	36338090	A	G	0.36	0.097415	0.0300343	1.20685	0.0014416
4	4:36349304	36349304	A	G	0.36	0.097415	0.0300343	1.20685	0.0014416
4	4:36387444	36387444	T	C	0.36	0.097415	0.0300343	1.20685	0.0014416
4	4:36439682	36439682	C	G	0.36	0.097415	0.0300343	1.20685	0.0014416
4	4:36461806	36461806	G	A	0.36	0.097415	0.0300343	1.20685	0.0014416
4	4:36509116	36509116	A	G	0.36	0.097415	0.0300343	1.20685	0.0014416
22	22:60308408	60308408	C	T	0.288	0.092448	0.0285491	1.10951	0.00144342
4	4:30710885	30710885	G	A	0.157	0.124679	0.0380545	0.991192	0.00145275
22	22:60435670	60435670	T	G	0.236	0.0994235	0.0305779	1.03953	0.00145686
29	29:39137985	39137985	C	A	0.458	0.0859721	0.0261727	0.973553	0.00146329
20	20:49618427	49618427	C	A	0.231	-0.105828	0.0325983	1.04479	0.00147205
1	1:105593900	105593900	A	G	0.071	0.163061	0.050453	1.18065	0.00147839
4	4:52178223	52178223	G	A	0.407	-0.0923082	0.0285814	1.09593	0.00149594
4	4:36215247	36215247	T	G	0.365	0.0976605	0.0302796	1.19385	0.00151837
1	1:95252252	95252252	A	G	0.441	0.0894963	0.0277287	1.0831	0.00151842
1	1:95281712	95281712	C	T	0.441	0.0894963	0.0277287	1.0831	0.00151842
11	11:22073226	22073226	A	G	0.195	0.106538	0.0324918	0.965412	0.00151847
11	11:22097406	22097406	A	G	0.195	0.106538	0.0324918	0.965412	0.00151847
11	11:22107887	22107887	T	C	0.195	0.106538	0.0324918	0.965412	0.00151847
11	11:22112442	22112442	T	C	0.195	0.106538	0.0324918	0.965412	0.00151847
20	20:48679134	48679134	A	G	0.294	-0.0960795	0.0298221	1.11939	0.00151925
20	20:48695874	48695874	T	C	0.294	-0.0960795	0.0298221	1.11939	0.00151925
20	20:48703437	48703437	G	A	0.294	-0.0960795	0.0298221	1.11939	0.00151925
20	20:48735837	48735837	C	T	0.294	-0.0960795	0.0298221	1.11939	0.00151925
20	20:48740499	48740499	T	C	0.294	-0.0960795	0.0298221	1.11939	0.00151925
20	20:48759582	48759582	C	T	0.294	-0.0960795	0.0298221	1.11939	0.00151925
36	36:27234474	27234474	C	A	0.214	-0.103728	0.03186	0.999984	0.00152169
37	37:22942612	22942612	A	T	0.482	0.0885869	0.027135	0.984932	0.00152212
29	29:38711667	38711667	C	T	0.318	0.0904636	0.0280924	1.15315	0.00152437
37	37:22762221	22762221	C	T	0.351	-0.0918279	0.0284899	1.09359	0.00152769
37	37:22763280	22763280	C	T	0.351	-0.0918279	0.0284899	1.09359	0.00152769
1	1:105521369	105521369	T	G	0.085	0.1514	0.0470235	1.17325	0.00153457
1	1:105548792	105548792	A	G	0.085	0.1514	0.0470235	1.17325	0.00153457
20	20:46940745	46940745	C	G	0.398	-0.091683	0.0283817	1.05394	0.00154095
20	20:46941772	46941772	G	A	0.398	-0.091683	0.0283817	1.05394	0.00154095
20	20:46967616	46967616	G	A	0.398	-0.091683	0.0283817	1.05394	0.00154095
37	37:26889962	26889962	T	C	0.457	0.0825486	0.0256276	1.09189	0.00154136
1	1:93151289	93151289	A	G	0.399	0.0925312	0.0286771	1.06247	0.00154872
1	1:93166693	93166693	G	A	0.399	0.0925312	0.0286771	1.06247	0.00154872
1	1:93168992	93168992	T	C	0.399	0.0925312	0.0286771	1.06247	0.00154872
26	26:10762593	10762593	G	C	0.419	0.0896129	0.0278684	1.10044	0.00156187
26	26:10762847	10762847	C	T	0.419	0.0896129	0.0278684	1.10044	0.00156187
20	20:48619310	48619310	A	G	0.326	-0.0935628	0.0291147	1.11179	0.00156393
4	4:37770624	37770624	G	A	0.225	0.107501	0.0331736	1.01438	0.0015715
4	4:37782390	37782390	T	C	0.225	0.107501	0.0331736	1.01438	0.0015715
4	4:37784182	37784182	A	G	0.225	0.107501	0.0331736	1.01438	0.0015715
4	4:37785687	37785687	G	A	0.225	0.107501	0.0331736	1.01438	0.0015715
30	30:11996925	11996925	A	C	0.224	0.111173	0.0342807	1.00828	0.00157577
30	30:12004558	12004558	A	G	0.224	0.111173	0.0342807	1.00828	0.00157577
20	20:45870090	45870090	A	G	0.342	-0.0933374	0.029063	1.10921	0.001577
30	30:12131975	12131975	T	C	0.152	0.122788	0.0377749	0.986659	0.00159983
20	20:46976143	46976143	G	C	0.397	-0.0917212	0.0285144	1.06106	0.00160015
37	37:23923509	23923509	A	G	0.344	0.0898969	0.0280236	1.19636	0.00161216
21	21:18073441	18073441	A	G	0.197	0.106811	0.0332715	1.0735	0.00161588
4	4:36248497	36248497	A	G	0.361	0.0960049	0.0299331	1.20791	0.00162402
20	20:46938895	46938895	G	A	0.397	-0.0911697	0.0283806	1.06034	0.00162406
20	20:48651691	48651691	G	T	0.286	-0.0954468	0.029847	1.13543	0.00163866
21	21:6055754	6055754	T	G	0.31	-0.0934811	0.0289611	1.01021	0.00164793
21	21:6075754	6075754	G	A	0.31	-0.0934811	0.0289611	1.01021	0.00164793
22	22:60546068	60546068	C	T	0.32	0.0857758	0.0268041	1.08246	0.00165859
21	21:17763814	17763814	A	G	0.198	0.106273	0.0332047	1.07898	0.00166113
1	1:37790513	37790513	A	G	0.07	-0.161629	0.0503569	1.24689	0.00167194
20	20:51593009	51593009	C	T	0.282	-0.0967086	0.030306	1.14943	0.0016758
4	4:53238217	53238217	G	T	0.395	-0.0914357	0.0284719	1.03317	0.00168195
7	7:63824639	63824639	C	A	0.472	0.0883886	0.0277049	1.10245	0.00169523
7	7:63828790	63828790	A	G	0.472	0.0883886	0.0277049	1.10245	0.00169523
7	7:63846290	63846290	C	A	0.472	0.0883886	0.0277049	1.10245	0.00169523
1	1:93553331	93553331	C	T	0.431	0.0892785	0.0278564	1.04122	0.00170258
7	7:2344218	2344218	C	A	0.055	0.192268	0.060014	1.04024	0.00170644
19	19:35709051	35709051	C	T	0.281	0.091788	0.0286902	1.05523	0.00170695
29	29:37902190	37902190	T	C	0.318	0.0909044	0.0285319	1.11939	0.00170726
12	12:70628846	70628846	A	G	0.106	-0.136832	0.0428752	1.20833	0.00171556
20	20:46688894	46688894	G	A	0.402	-0.0902171	0.028274	1.07862	0.00171641
1	1:120554380	120554380	G	A	0.175	0.109387	0.034166	1.03917	0.00171963
27	27:14113498	14113498	G	A	0.304	-0.0913446	0.0283803	1.311	0.00176509
39	39:87546053	87546053	T	C	0.404	0.0705478	0.0221974	1.18535	0.00176594
17	17:41903317	41903317	G	A	0.517	0.085369	0.0266456	1.01487	0.00177095
30	30:8109981	8109981	T	G	0.225	0.108574	0.0337183	0.977566	0.00180313
30	30:8143206	8143206	G	A	0.225	0.108574	0.0337183	0.977566	0.00180313
30	30:8207872	8207872	C	T	0.225	0.108574	0.0337183	0.977566	0.00180313
30	30:8268605	8268605	T	C	0.225	0.108574	0.0337183	0.977566	0.00180313
30	30:8293628	8293628	G	A	0.225	0.108574	0.0337183	0.977566	0.00180313
30	30:8297521	8297521	C	T	0.225	0.108574	0.0337183	0.977566	0.00180313
22	22:55792599	55792599	G	C	0.277	0.0940096	0.0295761	1.0632	0.00180744
5	5:13685043	13685043	A	G	0.271	0.09579	0.0302281	1.10582	0.00181399
5	5:13690557	13690557	G	C	0.271	0.09579	0.0302281	1.10582	0.00181399
21	21:1983335	1983335	T	C	0.286	-0.095421	0.029645	0.974574	0.00181445
30	30:8095837	8095837	A	C	0.226	0.108299	0.0337411	0.99064	0.00181583
11	11:21775569	21775569	T	C	0.274	0.0946663	0.0295086	0.988461	0.00182411
29	29:38236455	38236455	T	G	0.312	0.090041	0.0284444	1.10903	0.00183063
39	39:87387767	87387767	T	C	0.432	-0.0689449	0.0217985	1.16292	0.00184059
39	39:87395444	87395444	G	A	0.432	-0.0689449	0.0217985	1.16292	0.00184059
1	1:95744776	95744776	G	A	0.379	0.090711	0.0286123	1.07621	0.00184118
1	1:95750319	95750319	C	T	0.379	0.090711	0.0286123	1.07621	0.00184118
20	20:46840339	46840339	G	C	0.39	-0.0900873	0.0283788	1.05254	0.00185263
20	20:46868888	46868888	T	G	0.39	-0.0900873	0.0283788	1.05254	0.00185263
20	20:46876586	46876586	A	G	0.39	-0.0900873	0.0283788	1.05254	0.00185263
20	20:46898284	46898284	A	G	0.39	-0.0900873	0.0283788	1.05254	0.00185263
20	20:46910456	46910456	T	A	0.39	-0.0900873	0.0283788	1.05254	0.00185263
30	30:12368642	12368642	G	A	0.226	0.108704	0.0340894	1.01537	0.00186117
20	20:46921058	46921058	C	A	0.391	-0.0901776	0.0284145	1.0448	0.00187354
20	20:49734474	49734474	G	C	0.214	-0.107418	0.033815	1.03273	0.00187628
20	20:49769484	49769484	A	G	0.214	-0.107418	0.033815	1.03273	0.00187628
4	4:31763679	31763679	C	A	0.167	0.118799	0.037063	0.97346	0.0019024
4	4:31765712	31765712	C	T	0.167	0.118799	0.037063	0.97346	0.0019024
4	4:31777624	31777624	T	C	0.167	0.118799	0.037063	0.97346	0.0019024
22	22:60306152	60306152	A	G	0.285	0.0907379	0.028776	1.09721	0.00191305
20	20:50831028	50831028	A	G	0.268	-0.0972499	0.0308715	1.16501	0.00191837
17	17:41396571	41396571	A	C	0.455	0.0868278	0.0274335	1.04642	0.00192393
17	17:41541793	41541793	A	T	0.469	-0.083115	0.0261862	1.0242	0.00192401
21	21:990876	990876	A	G	0.311	-0.0920686	0.0286338	0.954389	0.00192535
29	29:37885274	37885274	C	T	0.32	0.0898543	0.0285469	1.12152	0.0019323
17	17:41891752	41891752	A	G	0.469	-0.084335	0.0265624	1.01419	0.00194849
17	17:41923246	41923246	G	A	0.469	-0.084335	0.0265624	1.01419	0.00194849
17	17:41926257	41926257	A	G	0.469	-0.084335	0.0265624	1.01419	0.00194849
7	7:63612716	63612716	A	C	0.473	0.086828	0.027594	1.10148	0.00195369
7	7:63618612	63618612	C	T	0.473	0.086828	0.027594	1.10148	0.00195369
25	25:8400710	8400710	G	A	0.087	0.142198	0.0451547	1.08147	0.00195853
25	25:8411152	8411152	A	G	0.087	0.142198	0.0451547	1.08147	0.00195853
39	39:87333233	87333233	C	T	0.421	0.0676738	0.0215248	1.11081	0.0019604
30	30:12341673	12341673	G	A	0.227	0.107852	0.0340317	1.02202	0.00196337
30	30:12381078	12381078	A	G	0.227	0.107852	0.0340317	1.02202	0.00196337
37	37:24569017	24569017	A	G	0.382	0.081058	0.0257628	1.08923	0.00196743
15	15:41762380	41762380	T	C	0.198	-0.106018	0.0337725	1.13716	0.00198122
15	15:41763327	41763327	C	T	0.198	-0.106018	0.0337725	1.13716	0.00198122
12	12:70603481	70603481	A	T	0.339	-0.0888459	0.0283058	1.11835	0.00198886
29	29:38383666	38383666	G	A	0.312	0.0885824	0.0282442	1.12861	0.00200135
29	29:38710974	38710974	A	G	0.314	0.088354	0.028174	1.14641	0.00200156
39	39:41249973	41249973	T	A	0.204	0.082571	0.0262097	1.23508	0.00200695
23	23:48808880	48808880	C	T	0.07	0.166197	0.0525179	1.01287	0.00200731
37	37:29245316	29245316	T	C	0.369	0.0857026	0.0272703	1.07511	0.00200738
29	29:38960989	38960989	T	C	0.423	0.0853306	0.0266227	0.94612	0.00203349
20	20:49804884	49804884	T	G	0.218	-0.104878	0.0333721	1.05773	0.00203721
20	20:7834774	7834774	G	A	0.051	0.183625	0.0577645	0.979732	0.00204515
1	1:95045443	95045443	T	C	0.331	0.0909111	0.0289177	1.05032	0.00205576
1	1:95047682	95047682	G	A	0.331	0.0909111	0.0289177	1.05032	0.00205576
9	9:59540377	59540377	T	A	0.465	-0.0824738	0.0263363	1.20046	0.00206922
39	39:88035109	88035109	T	C	0.377	0.0697342	0.0223127	1.14297	0.00207101
39	39:88041939	88041939	C	T	0.468	-0.0665075	0.021258	1.18455	0.00207155
11	11:44893230	44893230	C	T	0.233	0.106361	0.0333009	0.952562	0.00209399
11	11:44909368	44909368	C	T	0.233	0.106361	0.0333009	0.952562	0.00209399
39	39:86833581	86833581	C	T	0.425	0.0679567	0.0217589	1.09552	0.00211018
39	39:86862023	86862023	C	T	0.425	0.0679567	0.0217589	1.09552	0.00211018
21	21:17736298	17736298	T	C	0.167	0.111319	0.0356988	1.12755	0.00212063
21	21:17933668	17933668	T	C	0.167	0.111319	0.0356988	1.12755	0.00212063
20	20:45867844	45867844	G	C	0.367	-0.088226	0.0282867	1.10571	0.00212978
29	29:37498530	37498530	G	A	0.385	0.0849357	0.0272532	1.15164	0.00213124
19	19:35683217	35683217	A	G	0.284	0.0893016	0.0285642	1.05966	0.00215082
29	29:37513394	37513394	T	C	0.386	0.0849271	0.0272859	1.15654	0.0021604
20	20:51043789	51043789	C	T	0.32	-0.0912147	0.0293143	1.12704	0.00216625
4	4:36940129	36940129	G	A	0.218	0.105156	0.0335739	1.03386	0.00217385
4	4:36944650	36944650	G	A	0.218	0.105156	0.0335739	1.03386	0.00217385
29	29:38652434	38652434	C	T	0.29	0.0891332	0.0286525	1.11969	0.00217506
21	21:7765324	7765324	G	A	0.399	-0.0864183	0.0275381	1.01729	0.00218521
21	21:7767523	7767523	C	T	0.399	-0.0864183	0.0275381	1.01729	0.00218521
21	21:7790177	7790177	A	G	0.399	-0.0864183	0.0275381	1.01729	0.00218521
21	21:7790736	7790736	T	A	0.399	-0.0864183	0.0275381	1.01729	0.00218521
21	21:7795697	7795697	C	T	0.399	-0.0864183	0.0275381	1.01729	0.00218521
21	21:7809947	7809947	C	T	0.399	-0.0864183	0.0275381	1.01729	0.00218521
21	21:7818283	7818283	G	C	0.399	-0.0864183	0.0275381	1.01729	0.00218521
21	21:7822438	7822438	A	G	0.399	-0.0864183	0.0275381	1.01729	0.00218521
21	21:7832794	7832794	T	C	0.399	-0.0864183	0.0275381	1.01729	0.00218521
21	21:7835623	7835623	C	T	0.399	-0.0864183	0.0275381	1.01729	0.00218521
21	21:18376182	18376182	T	C	0.169	0.110797	0.0356756	1.13831	0.00220546
17	17:40862319	40862319	A	T	0.45	0.085128	0.0272413	1.03934	0.0022081
17	17:40882347	40882347	G	A	0.45	0.085128	0.0272413	1.03934	0.0022081
17	17:40899445	40899445	G	A	0.45	0.085128	0.0272413	1.03934	0.0022081
17	17:40905660	40905660	G	A	0.45	0.085128	0.0272413	1.03934	0.0022081
17	17:40947223	40947223	T	C	0.45	0.085128	0.0272413	1.03934	0.0022081
17	17:40993780	40993780	A	T	0.45	0.085128	0.0272413	1.03934	0.0022081
14	14:32689464	32689464	A	C	0.477	-0.0820154	0.0264051	1.11939	0.00220902
37	37:24606791	24606791	T	C	0.26	0.0909826	0.0293025	1.14202	0.0022102
30	30:12031705	12031705	T	C	0.225	0.107669	0.0342581	0.998969	0.00222016
1	1:94968052	94968052	T	C	0.333	0.0897001	0.0287803	1.05669	0.00222674
1	1:94980476	94980476	C	A	0.333	0.0897001	0.0287803	1.05669	0.00222674
1	1:94989225	94989225	A	C	0.333	0.0897001	0.0287803	1.05669	0.00222674
29	29:38635159	38635159	G	A	0.291	0.0889018	0.0286563	1.12478	0.00223224
11	11:37184031	37184031	G	A	0.457	0.0867526	0.0278771	1.06528	0.00224091
11	11:37269034	37269034	T	C	0.457	0.0867526	0.0278771	1.06528	0.00224091
11	11:37492582	37492582	C	T	0.457	0.0867526	0.0278771	1.06528	0.00224091
11	11:37523572	37523572	C	T	0.457	0.0867526	0.0278771	1.06528	0.00224091
11	11:37528494	37528494	G	A	0.457	0.0867526	0.0278771	1.06528	0.00224091
17	17:40959434	40959434	C	A	0.451	0.0850016	0.0272805	1.04309	0.00226305
21	21:7841878	7841878	C	T	0.4	-0.0859316	0.0274471	1.00974	0.00226549
21	21:7857999	7857999	C	A	0.4	-0.0859316	0.0274471	1.00974	0.00226549
22	22:60843405	60843405	T	A	0.363	-0.0841768	0.027178	1.11577	0.00227233
39	39:73771433	73771433	G	C	0.158	0.0881716	0.0284802	1.1694	0.00228603
39	39:74149699	74149699	A	G	0.158	0.0881716	0.0284802	1.1694	0.00228603
17	17:42299753	42299753	T	C	0.52	0.081944	0.0262477	1.02147	0.00228615
21	21:18395772	18395772	C	T	0.182	0.105328	0.0340342	1.17129	0.00229382
11	11:38435917	38435917	T	C	0.361	-0.0896017	0.0282991	0.951102	0.00230077
11	11:38460376	38460376	T	C	0.361	-0.0896017	0.0282991	0.951102	0.00230077
11	11:38481486	38481486	T	C	0.361	-0.0896017	0.0282991	0.951102	0.00230077
26	26:10732780	10732780	C	T	0.416	0.0863908	0.0279314	1.10003	0.00231955
20	20:50666355	50666355	G	A	0.293	-0.0930486	0.0301135	1.13035	0.00232011
4	4:31764722	31764722	C	T	0.169	0.116179	0.0369349	0.971532	0.00232079
29	29:38642583	38642583	G	C	0.291	0.0887048	0.028709	1.1274	0.00232212
29	29:38644984	38644984	C	G	0.291	0.0887048	0.028709	1.1274	0.00232212
29	29:38650118	38650118	A	G	0.291	0.0887048	0.028709	1.1274	0.00232212
36	36:27241275	27241275	G	A	0.243	-0.0952082	0.0306857	1.0504	0.00233436
21	21:18411896	18411896	T	C	0.182	0.104959	0.0340079	1.16571	0.0023526
4	4:37731266	37731266	T	C	0.224	0.102154	0.0328878	1.03505	0.00235796
1	1:95195460	95195460	T	G	0.367	0.0873781	0.0282773	1.07952	0.00237457
1	1:95254278	95254278	A	G	0.367	0.0873781	0.0282773	1.07952	0.00237457
29	29:38918249	38918249	G	A	0.462	0.0816668	0.026324	1.03578	0.00238348
11	11:43984954	43984954	C	T	0.217	0.104323	0.0331522	0.958803	0.00241025
11	11:43999082	43999082	A	G	0.217	0.104323	0.0331522	0.958803	0.00241025
11	11:44007821	44007821	G	A	0.217	0.104323	0.0331522	0.958803	0.00241025
11	11:44010149	44010149	A	G	0.217	0.104323	0.0331522	0.958803	0.00241025
2	2:69431633	69431633	C	T	0.37	-0.0873958	0.0279724	0.985602	0.00241152
36	36:13669514	13669514	A	G	0.14	-0.121318	0.039195	1.0436	0.00241409
23	23:35388150	35388150	A	T	0.324	0.0882454	0.0286817	1.11915	0.00242433
13	13:21821904	21821904	G	A	0.113	0.132605	0.0419591	0.932284	0.00243206
14	14:32755099	32755099	T	A	0.495	0.0802104	0.0260792	1.12075	0.0024322
11	11:22051327	22051327	A	G	0.264	0.0920164	0.0292395	0.947939	0.00243559
21	21:18380926	18380926	G	C	0.183	0.104569	0.0339923	1.17561	0.00243628
29	29:39107083	39107083	A	G	0.421	0.0841896	0.0266228	0.927894	0.00245312
1	1:38150379	38150379	T	G	0.067	-0.159956	0.0517575	1.25374	0.00247276
30	30:12193318	12193318	A	T	0.229	0.105272	0.0339832	1.01882	0.00248162
30	30:10142678	10142678	A	G	0.24	0.102354	0.0329744	1.0034	0.00249316
30	30:10166051	10166051	C	G	0.24	0.102354	0.0329744	1.0034	0.00249316
30	30:10180288	10180288	A	G	0.24	0.102354	0.0329744	1.0034	0.00249316
30	30:10187981	10187981	T	C	0.24	0.102354	0.0329744	1.0034	0.00249316
21	21:6588409	6588409	T	A	0.241	-0.0928778	0.0301792	1.06547	0.00249595
36	36:27240833	27240833	A	G	0.247	-0.0947437	0.030638	1.0224	0.00249905
20	20:49065565	49065565	C	G	0.102	-0.129683	0.0423215	1.13858	0.00251491
20	20:49068886	49068886	A	C	0.102	-0.129683	0.0423215	1.13858	0.00251491
11	11:38431249	38431249	C	T	0.38	-0.0901621	0.0277707	0.847269	0.00251586
11	11:38433473	38433473	A	G	0.38	-0.0901621	0.0277707	0.847269	0.00251586
15	15:41854386	41854386	C	T	0.191	-0.105548	0.0344188	1.09864	0.00252217
34	34:8310459	8310459	G	C	0.167	-0.110015	0.0358758	1.18487	0.00252295
4	4:37796797	37796797	T	C	0.229	0.10087	0.0327141	1.0333	0.00254004
4	4:37808412	37808412	G	A	0.229	0.10087	0.0327141	1.0333	0.00254004
20	20:46632055	46632055	C	T	0.394	-0.0868127	0.0282361	1.05555	0.00254404
37	37:29238456	29238456	A	G	0.371	0.0830575	0.0270982	1.08434	0.0025541
37	37:29246164	29246164	A	G	0.371	0.0830575	0.0270982	1.08434	0.0025541
2	2:69639068	69639068	T	C	0.368	-0.0872624	0.0281743	1.00085	0.00255602
2	2:69627833	69627833	T	C	0.36	-0.0875718	0.0283222	1.00766	0.00256917
37	37:23377830	23377830	A	G	0.146	0.117379	0.0383831	1.16867	0.00257542
15	15:41860664	41860664	A	G	0.19	-0.106363	0.0347741	1.09834	0.00258627
15	15:41866612	41866612	T	G	0.19	-0.106363	0.0347741	1.09834	0.00258627
1	1:120402077	120402077	C	G	0.232	0.0977185	0.0319403	1.09093	0.00258932
37	37:4180573	4180573	G	A	0.441	0.0816648	0.026583	1.04704	0.00259189
37	37:4213644	4213644	A	G	0.441	0.0816648	0.026583	1.04704	0.00259189
11	11:38464982	38464982	G	A	0.359	-0.0891131	0.0284673	0.949644	0.00259499
11	11:38493332	38493332	A	G	0.359	-0.0891131	0.0284673	0.949644	0.00259499
11	11:23616888	23616888	G	T	0.2	0.0993263	0.0318289	0.957179	0.00259543
37	37:3030000	3030000	T	C	0.458	0.0827769	0.0269004	1.03006	0.00260662
1	1:121628093	121628093	C	G	0.481	0.081239	0.026037	0.953751	0.0026126
37	37:2818685	2818685	G	A	0.396	0.0845648	0.0274066	1.01139	0.00261566
37	37:2825582	2825582	A	C	0.396	0.0845648	0.0274066	1.01139	0.00261566
37	37:27387009	27387009	A	G	0.103	0.129373	0.0418294	0.993765	0.00262393
37	37:24636730	24636730	G	A	0.253	0.0892868	0.0292835	1.11592	0.00264736
21	21:7869850	7869850	G	A	0.399	-0.0844685	0.0274094	1.0093	0.00265205
21	21:7872269	7872269	T	C	0.399	-0.0844685	0.0274094	1.0093	0.00265205
21	21:7880306	7880306	G	A	0.399	-0.0844685	0.0274094	1.0093	0.00265205
21	21:7882603	7882603	A	G	0.399	-0.0844685	0.0274094	1.0093	0.00265205
21	21:7890132	7890132	C	T	0.399	-0.0844685	0.0274094	1.0093	0.00265205
21	21:7906115	7906115	C	T	0.399	-0.0844685	0.0274094	1.0093	0.00265205
34	34:37056540	37056540	C	T	0.086	0.144169	0.0470017	1.25215	0.00265983
34	34:37063552	37063552	G	A	0.086	0.144169	0.0470017	1.25215	0.00265983
39	39:70142335	70142335	T	G	0.373	0.0672474	0.0219077	1.03076	0.00266018
11	11:25253061	25253061	A	G	0.283	-0.0944722	0.030636	1.00226	0.00266482
4	4:54446111	54446111	A	C	0.067	0.156286	0.0512598	1.09626	0.00267102
1	1:38625910	38625910	A	G	0.063	-0.16423	0.0536565	1.2463	0.00269689
20	20:49089807	49089807	C	T	0.083	-0.143343	0.0470527	1.1955	0.00270418
20	20:49379454	49379454	T	G	0.083	-0.143343	0.0470527	1.1955	0.00270418
39	39:87518581	87518581	T	C	0.39	0.067975	0.0223382	1.17798	0.00270966
11	11:38964018	38964018	G	T	0.408	-0.087052	0.0278349	0.938176	0.00271121
13	13:21987498	21987498	A	T	0.114	0.130198	0.0417883	0.944441	0.0027178
13	13:22034023	22034023	G	C	0.114	0.130198	0.0417883	0.944441	0.0027178
29	29:38915868	38915868	C	A	0.477	0.0788194	0.0257501	1.03252	0.00272822
20	20:45822678	45822678	A	G	0.317	-0.0909189	0.029871	1.08728	0.00272988
37	37:4177419	4177419	C	A	0.442	0.0812872	0.0266202	1.05251	0.00273021
21	21:6478117	6478117	A	G	0.139	-0.113627	0.0369434	0.996149	0.00275738
11	11:39157645	39157645	T	C	0.407	-0.0870257	0.0278993	0.940985	0.00276136
21	21:3884033	3884033	G	A	0.29	-0.091871	0.0297269	0.971171	0.00276871
1	1:40713297	40713297	T	C	0.103	-0.131839	0.0431137	1.26176	0.00277038
1	1:40734484	40734484	G	A	0.103	-0.131839	0.0431137	1.26176	0.00277038
1	1:40739067	40739067	C	T	0.103	-0.131839	0.0431137	1.26176	0.00277038
16	16:43269665	43269665	T	C	0.075	0.149425	0.0492698	1.13985	0.00277617
30	30:10603466	10603466	T	C	0.23	0.103488	0.0335847	0.985301	0.00277726
30	30:10614275	10614275	G	T	0.23	0.103488	0.0335847	0.985301	0.00277726
30	30:10648294	10648294	T	C	0.23	0.103488	0.0335847	0.985301	0.00277726
30	30:10663039	10663039	C	T	0.23	0.103488	0.0335847	0.985301	0.00277726
30	30:10683882	10683882	G	A	0.23	0.103488	0.0335847	0.985301	0.00277726
30	30:10691722	10691722	A	G	0.23	0.103488	0.0335847	0.985301	0.00277726
30	30:10704542	10704542	T	C	0.23	0.103488	0.0335847	0.985301	0.00277726
37	37:22015441	22015441	A	G	0.295	0.0880648	0.0288959	1.05032	0.00277774
22	22:60310878	60310878	T	C	0.249	0.0925089	0.0303775	1.05825	0.0027781
20	20:52165663	52165663	C	T	0.292	-0.0914976	0.0301671	1.11667	0.00278365
37	37:24608964	24608964	G	T	0.264	0.0891712	0.0294116	1.15056	0.0027859
20	20:45960414	45960414	T	C	0.362	-0.0871761	0.0287526	1.10328	0.00280858
29	29:38604796	38604796	C	T	0.294	0.0869631	0.0287098	1.12847	0.0028118
4	4:51717387	51717387	G	A	0.2	0.103479	0.034159	1.11079	0.00282144
13	13:21857759	21857759	A	G	0.114	0.129891	0.0418586	0.944832	0.00282551
13	13:21936136	21936136	A	G	0.114	0.129891	0.0418586	0.944832	0.00282551
13	13:21936561	21936561	A	C	0.114	0.129891	0.0418586	0.944832	0.00282551
19	19:40503353	40503353	T	C	0.352	0.0818464	0.0269818	1.08181	0.00283106
39	39:88025352	88025352	C	T	0.515	0.0636832	0.021031	1.17009	0.00283159
30	30:12376709	12376709	G	T	0.156	0.115213	0.037559	0.996192	0.00283859
20	20:48254033	48254033	T	C	0.188	-0.105691	0.0348603	1.20199	0.00284025
22	22:60544141	60544141	G	A	0.319	0.0813003	0.0268121	1.07852	0.00284455
4	4:51530268	51530268	T	G	0.443	-0.0878184	0.0289012	1.05704	0.00284908
11	11:44442303	44442303	G	C	0.283	0.0936529	0.0305236	0.994861	0.00284953
11	11:44449058	44449058	G	A	0.283	0.0936529	0.0305236	0.994861	0.00284953
39	39:70264869	70264869	T	C	0.377	0.066478	0.0218817	1.0556	0.00285106
11	11:22022515	22022515	C	T	0.26	0.0917487	0.0296585	0.9535	0.00285287
11	11:22038946	22038946	A	G	0.26	0.0917487	0.0296585	0.9535	0.00285287
29	29:38897038	38897038	G	A	0.458	0.0798858	0.026288	1.05065	0.0028615
21	21:3247548	3247548	A	G	0.212	-0.0996144	0.0321294	0.942114	0.00286292
21	21:3287984	3287984	G	C	0.212	-0.0996144	0.0321294	0.942114	0.00286292
21	21:3292952	3292952	C	T	0.212	-0.0996144	0.0321294	0.942114	0.00286292
21	21:3297231	3297231	C	T	0.212	-0.0996144	0.0321294	0.942114	0.00286292
21	21:3313779	3313779	C	A	0.212	-0.0996144	0.0321294	0.942114	0.00286292
21	21:3324525	3324525	A	G	0.212	-0.0996144	0.0321294	0.942114	0.00286292
21	21:3349715	3349715	C	A	0.212	-0.0996144	0.0321294	0.942114	0.00286292
21	21:3395806	3395806	C	G	0.212	-0.0996144	0.0321294	0.942114	0.00286292
21	21:3415438	3415438	C	T	0.212	-0.0996144	0.0321294	0.942114	0.00286292
37	37:23140975	23140975	G	A	0.178	0.105288	0.0347273	1.06929	0.00286673
2	2:69440870	69440870	T	C	0.369	-0.0860634	0.0280356	0.983507	0.0028838
11	11:44126921	44126921	T	C	0.274	0.0928414	0.0303351	1.00247	0.00288584
2	2:45208265	45208265	C	T	0.205	-0.104093	0.0340346	0.997151	0.00290622
12	12:70653882	70653882	A	G	0.324	-0.0873981	0.0289293	1.0989	0.00290838
39	39:43219849	43219849	A	G	0.505	0.0647393	0.0213288	1.04557	0.00290916
2	2:69346367	69346367	G	A	0.362	-0.086179	0.028112	0.985494	0.0029121
20	20:51053695	51053695	T	C	0.29	-0.0909911	0.030165	1.13564	0.00292231
20	20:45856025	45856025	A	C	0.361	-0.0871643	0.0288814	1.10966	0.00292579
2	2:69348402	69348402	G	A	0.363	-0.0858734	0.0280082	0.98062	0.00293672
17	17:41770552	41770552	C	A	0.459	0.0836451	0.0275858	1.04645	0.00293791
17	17:41771067	41771067	A	G	0.459	0.0836451	0.0275858	1.04645	0.00293791
17	17:41772655	41772655	G	A	0.459	0.0836451	0.0275858	1.04645	0.00293791
17	17:41777844	41777844	T	C	0.459	0.0836451	0.0275858	1.04645	0.00293791
4	4:51660551	51660551	A	G	0.201	0.103083	0.0341826	1.11698	0.00293898
4	4:51668946	51668946	T	C	0.201	0.103083	0.0341826	1.11698	0.00293898
4	4:51678544	51678544	G	A	0.201	0.103083	0.0341826	1.11698	0.00293898
4	4:51722567	51722567	T	G	0.201	0.103083	0.0341826	1.11698	0.00293898
4	4:51725050	51725050	A	G	0.201	0.103083	0.0341826	1.11698	0.00293898
20	20:49384471	49384471	A	G	0.081	-0.14297	0.0473059	1.20707	0.00293928
31	31:1175163	1175163	T	C	0.371	-0.0845348	0.0279248	1.05584	0.00295404
39	39:70339651	70339651	A	G	0.378	0.0662295	0.0218896	1.05863	0.00295526
26	26:10811043	10811043	C	T	0.469	-0.0827625	0.0273323	1.05209	0.00295542
20	20:46033135	46033135	C	T	0.324	-0.089257	0.0296104	1.1066	0.0029631
21	21:7739478	7739478	T	C	0.124	-0.117327	0.0383432	0.98385	0.00296647
37	37:4061607	4061607	G	A	0.437	0.0806822	0.0266512	1.05099	0.00296991
37	37:4062253	4062253	T	C	0.437	0.0806822	0.0266512	1.05099	0.00296991
20	20:52027169	52027169	A	G	0.244	-0.0954728	0.0317063	1.16297	0.0029784
20	20:52027846	52027846	A	G	0.244	-0.0954728	0.0317063	1.16297	0.0029784
20	20:46636656	46636656	C	A	0.393	-0.0853091	0.0282076	1.05462	0.00298259
23	23:49001324	49001324	A	G	0.076	0.149729	0.0495233	1.0533	0.00298779
33	33:14190205	14190205	T	C	0.173	0.103688	0.0343897	1.08063	0.00299644
1	1:38102133	38102133	G	T	0.075	-0.150143	0.0496693	1.23575	0.00300385
22	22:55125338	55125338	C	T	0.307	0.0877656	0.029187	1.13489	0.0030099
22	22:55127111	55127111	T	C	0.307	0.0877656	0.029187	1.13489	0.0030099
22	22:55127364	55127364	C	A	0.307	0.0877656	0.029187	1.13489	0.0030099
38	38:21839152	21839152	C	G	0.068	0.157364	0.0521112	1.05108	0.00303114
34	34:8313389	8313389	A	C	0.166	-0.108085	0.0359446	1.17881	0.00303299
34	34:8319627	8319627	T	C	0.166	-0.108085	0.0359446	1.17881	0.00303299
29	29:37519036	37519036	C	T	0.39	0.0818152	0.027223	1.16556	0.00303398
29	29:37523542	37523542	A	G	0.39	0.0818152	0.027223	1.16556	0.00303398
36	36:13723992	13723992	G	A	0.139	-0.118771	0.0392723	1.03771	0.00304267
36	36:13738073	13738073	G	A	0.139	-0.118771	0.0392723	1.03771	0.00304267
21	21:7273261	7273261	C	A	0.363	-0.0849288	0.0280114	1.01827	0.00305953
21	21:7436663	7436663	A	G	0.363	-0.0849288	0.0280114	1.01827	0.00305953
4	4:35712633	35712633	A	G	0.376	0.0882953	0.0293867	1.19322	0.00307176
29	29:38634766	38634766	C	A	0.3	0.0854628	0.0284916	1.13974	0.00307952
2	2:68964460	68964460	A	G	0.376	-0.0856484	0.0281064	0.986641	0.00307958
2	2:68965239	68965239	T	C	0.376	-0.0856484	0.0281064	0.986641	0.00307958
20	20:46036233	46036233	T	C	0.322	-0.0887768	0.0295796	1.11213	0.00307985
1	1:94059995	94059995	C	T	0.433	0.0849224	0.028265	1.08211	0.00309862
1	1:94062730	94062730	T	C	0.433	0.0849224	0.028265	1.08211	0.00309862
1	1:94063330	94063330	C	T	0.433	0.0849224	0.028265	1.08211	0.00309862
1	1:94071972	94071972	T	C	0.433	0.0849224	0.028265	1.08211	0.00309862
1	1:94077020	94077020	A	G	0.433	0.0849224	0.028265	1.08211	0.00309862
1	1:94087641	94087641	A	G	0.433	0.0849224	0.028265	1.08211	0.00309862
22	22:60814424	60814424	G	A	0.518	0.0775298	0.0257775	1.06664	0.00310063
2	2:68962296	68962296	C	T	0.377	-0.0853682	0.0280058	0.981694	0.00310118
11	11:38596931	38596931	A	G	0.36	-0.0871158	0.0282764	0.942272	0.00310132
29	29:37121372	37121372	G	A	0.378	0.0825122	0.0275291	1.12026	0.00310968
30	30:8610029	8610029	T	C	0.227	0.102193	0.033767	1.01485	0.00312976
20	20:6753853	6753853	T	C	0.103	0.130144	0.0431014	1.02429	0.00313949
21	21:6206174	6206174	G	T	0.239	-0.0911369	0.0303429	1.06875	0.00313988
21	21:6212252	6212252	T	C	0.239	-0.0911369	0.0303429	1.06875	0.00313988
21	21:6215912	6215912	G	A	0.239	-0.0911369	0.0303429	1.06875	0.00313988
21	21:6252100	6252100	C	A	0.239	-0.0911369	0.0303429	1.06875	0.00313988
21	21:6289857	6289857	T	C	0.239	-0.0911369	0.0303429	1.06875	0.00313988
21	21:6519027	6519027	G	A	0.239	-0.0911369	0.0303429	1.06875	0.00313988
30	30:7901972	7901972	A	C	0.223	0.102848	0.0337296	0.9749	0.0031438
30	30:7907422	7907422	A	G	0.223	0.102848	0.0337296	0.9749	0.0031438
30	30:7965838	7965838	A	G	0.223	0.102848	0.0337296	0.9749	0.0031438
30	30:7967851	7967851	T	G	0.223	0.102848	0.0337296	0.9749	0.0031438
17	17:41755216	41755216	G	A	0.46	0.0832613	0.0276671	1.04885	0.00314624
39	39:42420258	42420258	C	G	0.2	0.0789354	0.0263069	1.21426	0.00316524
12	12:45867122	45867122	A	G	0.387	0.0874606	0.0292274	1.18129	0.00317432
4	4:29410658	29410658	A	G	0.138	0.120703	0.0400205	1.02502	0.00317574
1	1:37788346	37788346	A	G	0.109	-0.128005	0.0427348	1.20055	0.00318182
11	11:39677121	39677121	C	T	0.405	-0.0865089	0.0278608	0.910296	0.00318392
11	11:39689534	39689534	G	A	0.405	-0.0865089	0.0278608	0.910296	0.00318392
39	39:41624753	41624753	C	A	0.2	0.0788695	0.0263108	1.21088	0.00318591
21	21:6605323	6605323	A	G	0.239	-0.0908267	0.0302764	1.06503	0.00318647
21	21:6615356	6615356	G	A	0.239	-0.0908267	0.0302764	1.06503	0.00318647
21	21:7282782	7282782	A	G	0.362	-0.0843473	0.0279678	1.02406	0.0031888
21	21:7296181	7296181	C	T	0.362	-0.0843473	0.0279678	1.02406	0.0031888
21	21:7300860	7300860	C	T	0.362	-0.0843473	0.0279678	1.02406	0.0031888
21	21:7354353	7354353	G	A	0.362	-0.0843473	0.0279678	1.02406	0.0031888
21	21:4299801	4299801	C	T	0.233	-0.0914199	0.0302632	1.0133	0.00319145
11	11:35302270	35302270	C	A	0.305	0.0905235	0.0302827	1.10983	0.00319996
4	4:36790787	36790787	G	A	0.216	0.100856	0.0335485	1.04148	0.0032049
11	11:38769229	38769229	T	C	0.36	-0.0872605	0.0283303	0.93065	0.00321643
20	20:46236238	46236238	A	G	0.352	-0.0867426	0.029049	1.12285	0.00321844
39	39:62482601	62482601	G	A	0.144	0.0890565	0.0297672	1.21145	0.00324488
21	21:4974263	4974263	T	C	0.234	-0.090627	0.0300637	1.01298	0.0032564
21	21:4976062	4976062	C	A	0.234	-0.090627	0.0300637	1.01298	0.0032564
11	11:38646033	38646033	T	C	0.359	-0.0868844	0.0283243	0.939929	0.00325936
19	19:40169990	40169990	A	C	0.351	0.0806712	0.0269681	1.05872	0.00329417
20	20:48439525	48439525	C	T	0.381	-0.0843611	0.028324	1.1041	0.00331473
17	17:42693398	42693398	G	A	0.475	-0.0785385	0.0261813	1.02807	0.00332937
4	4:52022130	52022130	C	G	0.412	-0.0852668	0.0286216	1.09105	0.00333387
20	20:50024456	50024456	T	A	0.25	-0.0966746	0.0323248	1.04604	0.00333741
7	7:80498216	80498216	A	G	0.533	0.0821698	0.027421	1.25785	0.00334807
21	21:7623056	7623056	T	A	0.255	-0.0892009	0.0298056	1.03621	0.00336359
11	11:35248546	35248546	C	T	0.307	0.0896066	0.0301534	1.11982	0.00336779
9	9:47541269	47541269	C	A	0.041	0.200497	0.0674558	1.11002	0.00336902
9	9:47541646	47541646	C	T	0.041	0.200497	0.0674558	1.11002	0.00336902
9	9:47545952	47545952	G	C	0.041	0.200497	0.0674558	1.11002	0.00336902
11	11:22092334	22092334	G	A	0.199	0.0969799	0.0320946	0.980581	0.00337157
4	4:51949026	51949026	A	G	0.411	-0.0853861	0.0287066	1.09514	0.0033742
4	4:35674056	35674056	C	T	0.18	0.106774	0.0357391	1.04672	0.00337446
4	4:35714659	35714659	A	G	0.18	0.106774	0.0357391	1.04672	0.00337446
17	17:41001223	41001223	G	A	0.472	0.0812664	0.027174	1.03813	0.00337728
37	37:27152439	27152439	C	T	0.339	-0.0812259	0.0273138	1.09371	0.00337981
10	10:26349276	26349276	A	G	0.181	-0.108037	0.0362956	1.07704	0.00339114
37	37:27138815	27138815	C	T	0.338	-0.081698	0.0274916	1.0993	0.00339141
20	20:45787891	45787891	C	G	0.354	-0.0852774	0.0287072	1.10217	0.00340096
14	14:35180233	35180233	A	C	0.456	0.0779008	0.0262549	1.15332	0.00340765
1	1:121217108	121217108	A	G	0.425	0.0757436	0.0254938	1.0912	0.0034104
22	22:19448351	19448351	T	C	0.268	-0.0887251	0.0298752	1.09868	0.00341403
20	20:50058058	50058058	T	C	0.249	-0.0965026	0.0323927	1.05466	0.00342774
20	20:50061872	50061872	G	A	0.249	-0.0965026	0.0323927	1.05466	0.00342774
36	36:27047264	27047264	C	A	0.227	-0.0935401	0.0314462	1.06911	0.00342875
37	37:27045938	27045938	A	G	0.353	0.0825913	0.0276921	1.03805	0.0034596
20	20:46222510	46222510	C	T	0.353	-0.0858113	0.0289621	1.11027	0.00347054
21	21:50361233	50361233	A	G	0.235	-0.0917131	0.0309565	1.17553	0.00347599
39	39:41618504	41618504	A	T	0.208	0.0777035	0.0261272	1.23126	0.00348844
39	39:87773150	87773150	A	G	0.386	0.0662774	0.0223916	1.16334	0.00349094
11	11:38583824	38583824	A	G	0.357	-0.0866008	0.0284448	0.94113	0.00349322
4	4:51691817	51691817	G	A	0.446	-0.0854685	0.0288012	1.07538	0.00349425
4	4:51704950	51704950	T	C	0.446	-0.0854685	0.0288012	1.07538	0.00349425
26	26:10697778	10697778	T	C	0.414	0.0829522	0.0280144	1.10205	0.0035011
20	20:50041802	50041802	T	A	0.209	-0.101392	0.0340404	1.03623	0.00350163
23	23:35569919	35569919	C	T	0.317	0.0859755	0.0290289	1.09305	0.00350908
37	37:24240188	24240188	C	T	0.449	0.0797727	0.0269757	1.15823	0.00351616
37	37:30677984	30677984	A	G	0.294	0.0841703	0.0284844	1.13618	0.00353467
21	21:7639287	7639287	A	T	0.123	-0.115557	0.0384162	0.977879	0.00353781
4	4:36741000	36741000	G	A	0.356	0.0874471	0.0295697	1.18848	0.00354864
29	29:37552042	37552042	A	G	0.391	0.0804395	0.0272319	1.15907	0.00355248
27	27:13517965	13517965	A	G	0.338	-0.0836291	0.02812	1.253	0.00355551
19	19:36423133	36423133	A	G	0.274	0.0867939	0.0292931	1.0707	0.00355714
20	20:50456102	50456102	C	G	0.268	-0.0916305	0.0310248	1.16151	0.00355898
17	17:42358157	42358157	C	A	0.469	-0.0792336	0.0265485	1.01453	0.00356551
23	23:47854749	47854749	C	T	0.102	0.129326	0.0437586	1.09248	0.00357496
20	20:51211343	51211343	A	G	0.321	-0.0866981	0.0293906	1.12879	0.00359355
20	20:51267046	51267046	C	T	0.321	-0.0866981	0.0293906	1.12879	0.00359355
20	20:51359321	51359321	A	G	0.321	-0.0866981	0.0293906	1.12879	0.00359355
20	20:51360075	51360075	G	A	0.321	-0.0866981	0.0293906	1.12879	0.00359355
37	37:24733895	24733895	G	A	0.354	0.0839875	0.0280535	0.990504	0.00359999
20	20:49822931	49822931	G	T	0.208	-0.101768	0.034284	1.03677	0.00361059
19	19:35965810	35965810	A	G	0.281	0.0854454	0.0288051	1.04601	0.00361251
19	19:36024482	36024482	T	C	0.281	0.0854454	0.0288051	1.04601	0.00361251
19	19:36151942	36151942	G	C	0.281	0.0854454	0.0288051	1.04601	0.00361251
19	19:36154055	36154055	A	G	0.281	0.0854454	0.0288051	1.04601	0.00361251
11	11:23934510	23934510	A	G	0.202	0.0950825	0.0315556	0.96116	0.00361605
36	36:15790250	15790250	C	A	0.202	-0.100272	0.0339734	1.09476	0.003619
11	11:38309432	38309432	G	A	0.477	-0.0832095	0.0281214	1.06149	0.00363452
4	4:32936936	32936936	C	G	0.221	0.0983921	0.0331402	1.03131	0.00364261
17	17:42761552	42761552	A	C	0.439	0.080441	0.0270638	1.02521	0.0036438
22	22:60798569	60798569	G	T	0.436	-0.0761306	0.0258105	1.09158	0.0036446
29	29:38199034	38199034	G	A	0.155	0.104083	0.0353175	1.10718	0.00364472
21	21:5940061	5940061	A	C	0.121	-0.115199	0.0385518	0.99329	0.00364824
21	21:6086003	6086003	A	G	0.121	-0.115199	0.0385518	0.99329	0.00364824
37	37:25720233	25720233	G	C	0.11	0.129915	0.0428529	0.934768	0.00365423
20	20:45896357	45896357	T	G	0.352	-0.0848122	0.0288083	1.11389	0.00367316
36	36:27229825	27229825	A	T	0.2	-0.0963348	0.0324067	1.0141	0.00368305
37	37:23333736	23333736	A	G	0.144	0.113164	0.0384656	1.1201	0.00368632
1	1:95747151	95747151	T	C	0.312	0.0879362	0.0298081	1.07702	0.00368705
22	22:60315813	60315813	A	G	0.268	0.0864508	0.0293691	1.10145	0.00369135
23	23:48323135	48323135	C	T	0.085	0.143276	0.048514	1.05884	0.00369149
20	20:49759782	49759782	A	C	0.207	-0.101517	0.0343171	1.04438	0.00369261
20	20:49800627	49800627	A	C	0.207	-0.101517	0.0343171	1.04438	0.00369261
36	36:27203633	27203633	G	A	0.217	-0.0944109	0.0318347	1.0247	0.00370231
14	14:35496395	35496395	A	G	0.447	0.0779746	0.0265358	1.15066	0.00371969
14	14:35496719	35496719	G	A	0.447	0.0779746	0.0265358	1.15066	0.00371969
29	29:37583170	37583170	G	A	0.379	0.0803171	0.0273479	1.14188	0.00373619
2	2:68938576	68938576	A	C	0.371	-0.0841628	0.0282451	0.99164	0.00376678
17	17:62614712	62614712	T	G	0.371	0.0788072	0.0268595	1.13833	0.00376874
29	29:38208315	38208315	G	T	0.156	0.103598	0.0353028	1.11471	0.00377729
29	29:38210538	38210538	G	A	0.156	0.103598	0.0353028	1.11471	0.00377729
17	17:62492342	62492342	C	T	0.372	0.0781769	0.026652	1.15281	0.00378059
17	17:62502695	62502695	G	A	0.372	0.0781769	0.026652	1.15281	0.00378059
4	4:35421950	35421950	T	C	0.377	0.0885483	0.0301862	1.17997	0.00380368
4	4:35425469	35425469	T	C	0.377	0.0885483	0.0301862	1.17997	0.00380368
4	4:35428251	35428251	A	G	0.377	0.0885483	0.0301862	1.17997	0.00380368
4	4:35443214	35443214	C	T	0.377	0.0885483	0.0301862	1.17997	0.00380368
4	4:35936117	35936117	A	G	0.176	0.105271	0.0357818	1.06521	0.00380779
22	22:48795583	48795583	C	T	0.227	-0.0933112	0.0318038	1.09474	0.0038166
20	20:46193075	46193075	G	A	0.352	-0.085161	0.0290481	1.11115	0.00381726
37	37:24608994	24608994	G	A	0.359	0.0806358	0.0274603	1.07243	0.00384669
19	19:36256028	36256028	T	C	0.491	0.0826928	0.0279246	1.01154	0.00385232
20	20:51667235	51667235	T	C	0.276	-0.0894868	0.0305683	1.12159	0.00385353
30	30:11502547	11502547	A	G	0.223	0.100877	0.0340589	1.00791	0.00386848
12	12:70426096	70426096	T	C	0.098	-0.131343	0.0446679	1.05084	0.0038814
22	22:3766702	3766702	C	A	0.407	0.0836681	0.0278492	0.944171	0.00388627
1	1:31875794	31875794	G	A	0.064	-0.156362	0.0534449	1.17271	0.00388833
1	1:31892544	31892544	A	G	0.064	-0.156362	0.0534449	1.17271	0.00388833
1	1:31894464	31894464	T	C	0.064	-0.156362	0.0534449	1.17271	0.00388833
1	1:31899876	31899876	A	C	0.064	-0.156362	0.0534449	1.17271	0.00388833
19	19:36113386	36113386	T	C	0.282	0.0846972	0.0288212	1.05253	0.00390215
20	20:49773116	49773116	C	T	0.247	-0.0953271	0.032508	1.06126	0.00393047
21	21:7287009	7287009	G	A	0.121	-0.114473	0.0386148	0.989587	0.00395382
23	23:34551467	34551467	C	A	0.156	-0.108353	0.0370981	1.18282	0.00396451
36	36:24100001	24100001	G	A	0.277	0.0900348	0.0303658	0.983951	0.00399029
37	37:23368725	23368725	T	C	0.141	0.112978	0.038779	1.14624	0.00401417
20	20:52359253	52359253	C	A	0.164	-0.10774	0.0367392	1.04135	0.00401651
20	20:52361495	52361495	T	G	0.164	-0.10774	0.0367392	1.04135	0.00401651
17	17:41344251	41344251	T	A	0.463	0.0800314	0.0273372	1.05512	0.00402044
1	1:92860538	92860538	T	A	0.511	0.0812643	0.0277083	1.03809	0.00402997
22	22:23632046	23632046	G	T	0.431	0.0844296	0.0276606	0.883131	0.00403528
20	20:51071918	51071918	A	G	0.241	-0.0928716	0.0318974	1.15735	0.00404183
17	17:42019581	42019581	T	C	0.455	0.0809659	0.0276015	1.03511	0.00404755
1	1:40085512	40085512	A	G	0.061	-0.160013	0.0546288	1.24456	0.00405133
4	4:37725469	37725469	A	C	0.337	0.0856402	0.0294293	1.14137	0.00405556
11	11:23588728	23588728	C	T	0.265	0.0876903	0.0292119	0.928174	0.00407222
21	21:5961819	5961819	G	A	0.242	-0.0880218	0.0301929	1.07977	0.00408248
39	39:87856303	87856303	T	G	0.473	-0.0621461	0.021359	1.17513	0.00408756
17	17:40662168	40662168	C	T	0.389	-0.0807407	0.0268917	0.929678	0.00409036
22	22:10219792	10219792	A	G	0.31	0.0909017	0.0301957	0.916312	0.00410539
22	22:10228767	10228767	G	A	0.31	0.0909017	0.0301957	0.916312	0.00410539
22	22:10238630	10238630	A	G	0.31	0.0909017	0.0301957	0.916312	0.00410539
22	22:10246717	10246717	C	T	0.31	0.0909017	0.0301957	0.916312	0.00410539
22	22:10247193	10247193	C	T	0.31	0.0909017	0.0301957	0.916312	0.00410539
22	22:10250489	10250489	C	T	0.31	0.0909017	0.0301957	0.916312	0.00410539
22	22:10250787	10250787	C	T	0.31	0.0909017	0.0301957	0.916312	0.00410539
22	22:10266286	10266286	T	C	0.31	0.0909017	0.0301957	0.916312	0.00410539
22	22:10282048	10282048	C	T	0.31	0.0909017	0.0301957	0.916312	0.00410539
22	22:10291794	10291794	C	T	0.31	0.0909017	0.0301957	0.916312	0.00410539
22	22:10294479	10294479	T	G	0.31	0.0909017	0.0301957	0.916312	0.00410539
22	22:10297495	10297495	G	A	0.31	0.0909017	0.0301957	0.916312	0.00410539
37	37:23924914	23924914	T	G	0.4	0.0782043	0.0268306	1.21732	0.00412599
23	23:35178865	35178865	T	C	0.31	0.0863855	0.0296896	1.08688	0.00413062
17	17:40958010	40958010	C	T	0.475	0.0790463	0.0270678	1.04911	0.00413721
37	37:27170913	27170913	T	G	0.3	0.0824342	0.0282239	1.04688	0.00414345
1	1:95550594	95550594	G	A	0.313	0.0869116	0.0298627	1.07695	0.00416307
1	1:95660756	95660756	G	C	0.313	0.0869116	0.0298627	1.07695	0.00416307
37	37:23132411	23132411	G	A	0.143	0.112116	0.0386411	1.15037	0.00416336
4	4:29405130	29405130	G	A	0.135	0.119091	0.0406229	1.01848	0.00416471
37	37:24723302	24723302	G	A	0.356	0.0830496	0.0282492	1.00136	0.00416748
37	37:1887516	1887516	A	G	0.434	0.0779674	0.026809	1.07989	0.00417425
1	1:120557668	120557668	A	G	0.243	0.0869873	0.0299948	1.12125	0.00418675
12	12:70314512	70314512	G	A	0.126	-0.116664	0.0401968	1.10196	0.00418726
20	20:51053400	51053400	T	C	0.24	-0.0930645	0.0321032	1.15808	0.00420074
37	37:27076074	27076074	T	C	0.207	0.0936634	0.032191	1.06436	0.00420582
39	39:36845697	36845697	C	T	0.087	0.107298	0.0370137	1.16552	0.0042096
36	36:15797834	15797834	T	C	0.2	-0.0996469	0.0343597	1.10132	0.00421894
36	36:15799825	15799825	G	C	0.2	-0.0996469	0.0343597	1.10132	0.00421894
36	36:15801155	15801155	T	C	0.2	-0.0996469	0.0343597	1.10132	0.00421894
36	36:15803172	15803172	T	A	0.2	-0.0996469	0.0343597	1.10132	0.00421894
36	36:15941230	15941230	C	A	0.2	-0.0996469	0.0343597	1.10132	0.00421894
17	17:42710069	42710069	C	G	0.464	0.0790476	0.0269633	1.00993	0.00422647
17	17:42714835	42714835	A	G	0.464	0.0790476	0.0269633	1.00993	0.00422647
21	21:6110151	6110151	T	C	0.219	-0.0911899	0.0313651	1.06678	0.00422722
21	21:6130886	6130886	A	G	0.219	-0.0911899	0.0313651	1.06678	0.00422722
21	21:6137200	6137200	T	C	0.219	-0.0911899	0.0313651	1.06678	0.00422722
21	21:6197832	6197832	G	T	0.219	-0.0911899	0.0313651	1.06678	0.00422722
21	21:6199084	6199084	G	A	0.219	-0.0911899	0.0313651	1.06678	0.00422722
21	21:6199515	6199515	T	A	0.219	-0.0911899	0.0313651	1.06678	0.00422722
21	21:6200403	6200403	T	C	0.219	-0.0911899	0.0313651	1.06678	0.00422722
21	21:4658707	4658707	T	C	0.214	-0.0917461	0.031323	1.01112	0.00425305
21	21:4678214	4678214	A	G	0.214	-0.0917461	0.031323	1.01112	0.00425305
21	21:4683733	4683733	T	C	0.214	-0.0917461	0.031323	1.01112	0.00425305
21	21:4688974	4688974	G	A	0.214	-0.0917461	0.031323	1.01112	0.00425305
21	21:4690898	4690898	G	A	0.214	-0.0917461	0.031323	1.01112	0.00425305
15	15:21536229	21536229	A	C	0.088	-0.135536	0.0465399	1.04664	0.00425442
17	17:42781553	42781553	G	A	0.44	0.0789748	0.0270274	1.02386	0.00426135
17	17:42785370	42785370	G	A	0.44	0.0789748	0.0270274	1.02386	0.00426135
17	17:42788834	42788834	C	T	0.44	0.0789748	0.0270274	1.02386	0.00426135
17	17:42791058	42791058	G	A	0.44	0.0789748	0.0270274	1.02386	0.00426135
34	34:9271754	9271754	G	A	0.182	-0.100083	0.0345179	1.19851	0.00426378
26	26:11969579	11969579	G	A	0.474	0.0788629	0.0271682	1.0712	0.00426758
39	39:87969110	87969110	C	A	0.388	0.0647729	0.0223825	1.16107	0.00426772
20	20:51599631	51599631	T	C	0.268	-0.0892068	0.0308324	1.11895	0.00427806
20	20:51634416	51634416	A	G	0.268	-0.0892068	0.0308324	1.11895	0.00427806
20	20:51634640	51634640	T	C	0.268	-0.0892068	0.0308324	1.11895	0.00427806
13	13:21824214	21824214	C	T	0.221	0.0968613	0.0323732	0.924091	0.00427854
20	20:52082457	52082457	T	C	0.27	-0.0882721	0.0305082	1.11416	0.00428221
12	12:70308409	70308409	T	C	0.124	-0.116429	0.0402423	1.10823	0.00429321
30	30:12489971	12489971	C	G	0.344	0.0859199	0.0296299	1.07597	0.00429937
11	11:44394545	44394545	T	A	0.231	0.0987998	0.0332832	0.950726	0.00430577
11	11:21805424	21805424	T	G	0.26	0.0881465	0.0298479	0.965229	0.00431214
1	1:121900921	121900921	A	G	0.118	0.121065	0.0403546	0.907678	0.00432583
4	4:37555668	37555668	G	T	0.337	0.0845496	0.0292743	1.14027	0.00433327
12	12:70638468	70638468	T	C	0.328	-0.0831572	0.028746	1.09031	0.00433529
12	12:70640836	70640836	C	A	0.328	-0.0831572	0.028746	1.09031	0.00433529
21	21:3471461	3471461	A	T	0.136	-0.108452	0.0369312	0.986736	0.00433718
21	21:3480997	3480997	C	A	0.136	-0.108452	0.0369312	0.986736	0.00433718
21	21:3503872	3503872	G	T	0.136	-0.108452	0.0369312	0.986736	0.00433718
11	11:35226201	35226201	C	T	0.31	0.0867966	0.0300467	1.11959	0.00433925
4	4:35692691	35692691	A	C	0.378	0.0852694	0.0295156	1.17872	0.00435099
4	4:35705969	35705969	G	A	0.378	0.0852694	0.0295156	1.17872	0.00435099
4	4:51794473	51794473	C	T	0.441	-0.0835044	0.0288987	1.09256	0.00438165
20	20:46215492	46215492	C	T	0.344	-0.0837937	0.0290346	1.11384	0.00438255
1	1:36360374	36360374	T	G	0.066	-0.153	0.0525659	1.26443	0.00438873
21	21:6881905	6881905	T	C	0.223	-0.0901429	0.0310579	1.04421	0.00439618
21	21:6898942	6898942	G	A	0.223	-0.0901429	0.0310579	1.04421	0.00439618
20	20:49353792	49353792	G	A	0.253	-0.0924226	0.031954	1.07205	0.0043964
39	39:87431735	87431735	C	T	0.39	0.064048	0.0222058	1.1706	0.00440589
37	37:24597230	24597230	T	G	0.429	-0.0782083	0.0267551	0.998549	0.00441179
17	17:42793223	42793223	A	G	0.441	0.0785712	0.0270359	1.02805	0.00444372
17	17:42832207	42832207	C	A	0.441	0.0785712	0.0270359	1.02805	0.00444372
17	17:42841499	42841499	T	G	0.441	0.0785712	0.0270359	1.02805	0.00444372
17	17:42852543	42852543	T	A	0.441	0.0785712	0.0270359	1.02805	0.00444372
39	39:42402449	42402449	A	G	0.209	0.075437	0.0260852	1.22309	0.00445025
19	19:36136947	36136947	C	T	0.284	0.0830329	0.0286821	1.05092	0.00446808
19	19:36158885	36158885	A	G	0.284	0.0830329	0.0286821	1.05092	0.00446808
20	20:52042257	52042257	T	G	0.3	-0.0863162	0.0300074	1.12674	0.00449316
23	23:48740195	48740195	G	A	0.173	0.0983396	0.034175	1.10648	0.00450237
20	20:49334793	49334793	T	C	0.213	-0.0954512	0.0331685	1.10444	0.00450373
17	17:40774182	40774182	G	A	0.271	-0.0872593	0.0295239	0.946786	0.00451144
17	17:41336113	41336113	T	C	0.476	0.0785064	0.0271667	1.05411	0.00451518
4	4:63102963	63102963	T	C	0.063	0.15379	0.0535037	1.15328	0.00452017
36	36:25180752	25180752	C	T	0.46	-0.0781658	0.0267968	0.995567	0.00452486
20	20:49691141	49691141	G	T	0.207	-0.0994338	0.0343405	1.03406	0.00452803
19	19:36286303	36286303	A	T	0.288	0.0829645	0.02867	1.04145	0.0045353
37	37:22787392	22787392	A	G	0.16	0.104007	0.0360331	1.05588	0.00454321
20	20:53056120	53056120	G	A	0.179	-0.101926	0.0349771	0.997353	0.00454552
21	21:6117728	6117728	A	G	0.218	-0.0904582	0.0313826	1.06884	0.00455033
8	8:59231651	59231651	A	G	0.295	0.0896698	0.0306823	0.984275	0.00455134
8	8:59235979	59235979	T	C	0.295	0.0896698	0.0306823	0.984275	0.00455134
8	8:59266949	59266949	G	A	0.295	0.0896698	0.0306823	0.984275	0.00455134
17	17:42833275	42833275	T	G	0.442	0.0784105	0.0270719	1.03164	0.00455488
29	29:39275164	39275164	A	C	0.414	0.0780047	0.0264071	0.942776	0.00455741
37	37:23350375	23350375	A	G	0.15	0.108907	0.037946	1.152	0.00457881
37	37:28778518	28778518	C	A	0.347	-0.0800186	0.0278091	1.07553	0.00458756
21	21:4947248	4947248	A	G	0.137	-0.106501	0.0364955	0.986303	0.00459113
5	5:86549670	86549670	G	A	0.139	-0.110286	0.0380423	1.01909	0.00459295
2	2:69719426	69719426	A	C	0.373	-0.081622	0.0279111	0.976905	0.00459991
20	20:49685260	49685260	A	G	0.206	-0.0991805	0.0343746	1.04154	0.00462815
20	20:49706620	49706620	A	G	0.206	-0.0991805	0.0343746	1.04154	0.00462815
20	20:49723855	49723855	T	C	0.206	-0.0991805	0.0343746	1.04154	0.00462815
16	16:58428692	58428692	A	C	0.39	-0.0780717	0.0272357	1.16343	0.0046366
22	22:56276197	56276197	G	A	0.516	-0.0766253	0.0264482	1.01731	0.00463696
22	22:56285778	56285778	C	T	0.516	-0.0766253	0.0264482	1.01731	0.00463696
31	31:2166145	2166145	T	G	0.364	-0.0805069	0.0279934	1.07027	0.00463812
31	31:2178446	2178446	A	G	0.364	-0.0805069	0.0279934	1.07027	0.00463812
31	31:2179486	2179486	A	G	0.364	-0.0805069	0.0279934	1.07027	0.00463812
31	31:2221905	2221905	G	T	0.364	-0.0805069	0.0279934	1.07027	0.00463812
31	31:2233865	2233865	A	G	0.364	-0.0805069	0.0279934	1.07027	0.00463812
4	4:25379154	25379154	G	A	0.061	0.158713	0.0552031	1.22182	0.00466473
4	4:25395586	25395586	C	T	0.061	0.158713	0.0552031	1.22182	0.00466473
4	4:25421613	25421613	G	A	0.061	0.158713	0.0552031	1.22182	0.00466473
11	11:38307200	38307200	T	C	0.457	-0.0817484	0.028548	1.14823	0.00466753
11	11:38308478	38308478	T	C	0.457	-0.0817484	0.028548	1.14823	0.00466753
39	39:63297861	63297861	T	C	0.166	0.0807354	0.0277814	1.29724	0.00467099
23	23:50800785	50800785	C	T	0.227	-0.0858633	0.0299527	1.09436	0.00467809
11	11:23685878	23685878	T	C	0.199	0.0935085	0.0319524	0.964503	0.00469475
11	11:23694824	23694824	C	A	0.199	0.0935085	0.0319524	0.964503	0.00469475
22	22:60828698	60828698	A	G	0.517	0.074213	0.0258568	1.07053	0.00470859
26	26:7992938	7992938	T	G	0.408	-0.0788634	0.0275736	1.13655	0.00471529
4	4:25423549	25423549	C	T	0.061	0.160276	0.0558612	1.21361	0.00471827
37	37:3835261	3835261	A	G	0.458	0.0760578	0.0264518	1.0538	0.00472265
11	11:43777655	43777655	T	C	0.234	0.0953103	0.0325265	0.962631	0.00472359
37	37:4266015	4266015	T	C	0.397	0.0781695	0.0272146	1.06231	0.00472614
14	14:30492949	30492949	T	C	0.317	0.0842788	0.0294091	1.20438	0.0047386
1	1:121630495	121630495	C	T	0.489	0.0754824	0.025864	0.969681	0.00474177
37	37:29623444	29623444	C	T	0.329	0.0783853	0.0274212	1.16284	0.00474965
22	22:10229048	10229048	C	A	0.311	0.0895944	0.0302244	0.915393	0.00475569
26	26:35550981	35550981	T	C	0.052	-0.169145	0.0591374	1.18218	0.00475974
20	20:46029825	46029825	T	C	0.325	-0.0847755	0.0296551	1.10758	0.00476887
30	30:9008827	9008827	G	C	0.259	0.0916295	0.0315573	0.99063	0.00477098
30	30:9019578	9019578	A	C	0.259	0.0916295	0.0315573	0.99063	0.00477098
30	30:9019650	9019650	A	C	0.259	0.0916295	0.0315573	0.99063	0.00477098
30	30:9022388	9022388	A	G	0.259	0.0916295	0.0315573	0.99063	0.00477098
30	30:9023487	9023487	A	G	0.259	0.0916295	0.0315573	0.99063	0.00477098
26	26:10730798	10730798	C	T	0.466	0.0770152	0.0269262	1.09571	0.00477211
32	32:11926212	11926212	A	G	0.113	0.123717	0.0425536	1.31241	0.00477242
23	23:35619819	35619819	A	G	0.326	0.0824308	0.0288302	1.0948	0.00478766
23	23:35622498	35622498	G	A	0.326	0.0824308	0.0288302	1.0948	0.00478766
23	23:35674044	35674044	T	C	0.326	0.0824308	0.0288302	1.0948	0.00478766
19	19:37625963	37625963	G	A	0.262	0.0870914	0.0304474	1.08357	0.0048076
11	11:36479970	36479970	C	T	0.403	0.0803331	0.0281265	1.1791	0.00480812
19	19:36125137	36125137	G	A	0.285	0.0822874	0.0286965	1.05722	0.0048194
11	11:43769725	43769725	G	T	0.233	0.0953259	0.0325163	0.952609	0.004829
11	11:43773041	43773041	A	T	0.233	0.0953259	0.0325163	0.952609	0.004829
11	11:43785121	43785121	T	C	0.233	0.0953259	0.0325163	0.952609	0.004829
11	11:43793668	43793668	C	A	0.233	0.0953259	0.0325163	0.952609	0.004829
14	14:34925979	34925979	A	G	0.42	0.0757041	0.0265455	1.14106	0.00483264
14	14:34927494	34927494	G	C	0.42	0.0757041	0.0265455	1.14106	0.00483264
14	14:34934298	34934298	C	T	0.42	0.0757041	0.0265455	1.14106	0.00483264
21	21:19017180	19017180	T	G	0.38	0.0817363	0.0285805	1.07796	0.00483305
39	39:32958944	32958944	A	G	0.131	-0.0898754	0.0314504	1.08634	0.00483374
39	39:33122471	33122471	T	C	0.132	-0.0897118	0.0313797	1.07919	0.00484031
39	39:33191409	33191409	C	T	0.132	-0.0897118	0.0313797	1.07919	0.00484031
39	39:33193795	33193795	G	A	0.132	-0.0897118	0.0313797	1.07919	0.00484031
23	23:48573584	48573584	A	G	0.088	0.135147	0.0473367	1.09227	0.004849
14	14:24388419	24388419	A	G	0.333	-0.07993	0.0279392	1.06924	0.00485049
2	2:69430548	69430548	T	C	0.37	-0.0813126	0.0280174	0.983109	0.0048603
31	31:2201208	2201208	G	A	0.363	-0.0799458	0.0279616	1.07391	0.0048633
31	31:2210422	2210422	A	C	0.363	-0.0799458	0.0279616	1.07391	0.0048633
31	31:2227218	2227218	C	T	0.363	-0.0799458	0.0279616	1.07391	0.0048633
14	14:30476443	30476443	C	T	0.318	0.0840333	0.0294044	1.20859	0.00486697
20	20:4596875	4596875	C	G	0.05	0.162942	0.0566231	1.02043	0.00488124
20	20:4604976	4604976	G	A	0.05	0.162942	0.0566231	1.02043	0.00488124
20	20:4607182	4607182	T	C	0.05	0.162942	0.0566231	1.02043	0.00488124
20	20:4615690	4615690	C	T	0.05	0.162942	0.0566231	1.02043	0.00488124
20	20:4633416	4633416	C	T	0.05	0.162942	0.0566231	1.02043	0.00488124
20	20:4645689	4645689	C	T	0.05	0.162942	0.0566231	1.02043	0.00488124
20	20:5285594	5285594	G	A	0.05	0.162942	0.0566231	1.02043	0.00488124
17	17:41745987	41745987	C	T	0.273	-0.0886761	0.0304025	0.962016	0.00488603
17	17:62462992	62462992	G	A	0.369	0.0758703	0.0266347	1.15705	0.0048874
20	20:53022375	53022375	G	A	0.178	-0.101159	0.0350696	1.00614	0.00489465
20	20:51902193	51902193	G	A	0.298	-0.0854057	0.0299949	1.14041	0.00489825
8	8:49290052	49290052	G	A	0.273	0.0849134	0.0297944	1.10423	0.00489865
8	8:49290710	49290710	G	T	0.273	0.0849134	0.0297944	1.10423	0.00489865
10	10:26840036	26840036	A	G	0.164	-0.108871	0.037898	1.02881	0.00490523
10	10:26845887	26845887	T	C	0.164	-0.108871	0.037898	1.02881	0.00490523
10	10:26946901	26946901	A	G	0.164	-0.108871	0.037898	1.02881	0.00490523
10	10:26968074	26968074	G	A	0.164	-0.108871	0.037898	1.02881	0.00490523
5	5:52055244	52055244	T	C	0.16	0.108898	0.0371556	0.942331	0.00490745
20	20:49983008	49983008	T	C	0.245	-0.0939433	0.0328315	1.05409	0.00491123
20	20:49983618	49983618	G	A	0.245	-0.0939433	0.0328315	1.05409	0.00491123
4	4:35809996	35809996	T	C	0.178	0.102391	0.0357838	1.05438	0.0049184
4	4:35877124	35877124	A	G	0.178	0.102391	0.0357838	1.05438	0.0049184
4	4:36128587	36128587	G	C	0.178	0.102391	0.0357838	1.05438	0.0049184
22	22:48809272	48809272	C	T	0.225	-0.0913069	0.0320335	1.09108	0.00492547
20	20:45819050	45819050	T	G	0.336	-0.0841975	0.0295337	1.08907	0.00492733
11	11:36350074	36350074	A	T	0.403	0.0805022	0.0282711	1.1772	0.00493006
4	4:23591037	23591037	G	A	0.067	0.152452	0.0533624	1.22365	0.00493524
4	4:23653394	23653394	C	T	0.067	0.152452	0.0533624	1.22365	0.00493524
4	4:23660587	23660587	T	C	0.067	0.152452	0.0533624	1.22365	0.00493524
12	12:45888287	45888287	G	A	0.181	0.106224	0.037333	1.12363	0.00493993
10	10:27142750	27142750	G	C	0.164	-0.108457	0.0377328	1.02041	0.00494257
4	4:37883211	37883211	T	C	0.335	0.0835401	0.0293702	1.11654	0.00496388
4	4:37888831	37888831	T	C	0.335	0.0835401	0.0293702	1.11654	0.00496388
7	7:64545119	64545119	T	A	0.484	0.0796359	0.0279896	1.10934	0.00496411
29	29:39297831	39297831	T	C	0.415	0.0769845	0.0263744	0.951186	0.00496414
1	1:92054747	92054747	A	C	0.26	0.0937564	0.0328773	1.07721	0.00496619
37	37:30636882	30636882	C	T	0.342	0.0755331	0.0265687	1.11494	0.00498187
8	8:50489221	50489221	G	A	0.253	0.0883091	0.031064	1.11289	0.00498951
21	21:50528392	50528392	G	A	0.252	-0.0866704	0.0304826	1.17524	0.00499168
33	33:14096451	14096451	C	T	0.166	0.0997156	0.034816	1.03305	0.00500101
31	31:25268946	25268946	G	T	0.213	0.0943395	0.032378	0.954001	0.00500913
31	31:25297008	25297008	T	C	0.213	0.0943395	0.032378	0.954001	0.00500913
31	31:25297901	25297901	G	A	0.213	0.0943395	0.032378	0.954001	0.00500913
35	35:12956397	12956397	C	T	0.403	0.0800535	0.0279941	1.04187	0.00501544
35	35:13009405	13009405	T	A	0.403	0.0800535	0.0279941	1.04187	0.00501544
29	29:37580777	37580777	G	A	0.38	0.0774932	0.0272915	1.13192	0.00501774
20	20:46462610	46462610	C	G	0.491	-0.0851617	0.0299317	1.08595	0.00501838
20	20:49911455	49911455	G	C	0.243	-0.0938583	0.0329383	1.06744	0.00502284
8	8:50562807	50562807	C	T	0.256	0.0879195	0.0309711	1.13067	0.00502939
19	19:35299122	35299122	A	G	0.404	0.0781287	0.0272724	1.02646	0.00504318
37	37:2283418	2283418	T	G	0.479	0.0754005	0.02657	1.12364	0.00505114
37	37:2190158	2190158	T	C	0.48	0.0756237	0.0266646	1.12793	0.00507247
16	16:44107219	44107219	A	C	0.077	0.139067	0.0490488	1.1355	0.00507875
11	11:25268273	25268273	T	C	0.284	-0.0875986	0.0304872	1.00559	0.0050866
8	8:50568378	50568378	A	G	0.255	0.0878982	0.0309986	1.11984	0.00508824
8	8:50572687	50572687	G	T	0.255	0.0878982	0.0309986	1.11984	0.00508824
2	2:69778866	69778866	T	C	0.371	-0.0807904	0.0279839	0.981518	0.00510588
4	4:37871750	37871750	A	G	0.336	0.0833407	0.0294048	1.12083	0.00510971
4	4:37875752	37875752	A	G	0.336	0.0833407	0.0294048	1.12083	0.00510971
4	4:37875849	37875849	C	T	0.336	0.0833407	0.0294048	1.12083	0.00510971
38	38:2740174	2740174	G	A	0.38	-0.077317	0.0272288	1.08306	0.00511519
4	4:35529324	35529324	G	A	0.379	0.0853717	0.0301167	1.17534	0.00511565
16	16:46278262	46278262	A	C	0.133	-0.1073	0.0377592	1.07391	0.00511608
2	2:79639892	79639892	T	A	0.362	-0.0803219	0.0283297	1.10567	0.00512308
22	22:3603276	3603276	A	G	0.404	0.0810345	0.0278642	0.951257	0.00513618
25	25:11811417	11811417	A	G	0.077	0.135345	0.047551	1.05479	0.00513971
37	37:25843514	25843514	C	T	0.294	0.0843682	0.029447	1.01127	0.00514607
22	22:60921011	60921011	C	G	0.373	-0.0762641	0.026933	1.11442	0.00515326
20	20:52193276	52193276	A	G	0.176	-0.101833	0.0357422	1.04366	0.00515667
10	10:27149143	27149143	T	G	0.163	-0.10807	0.0378168	1.02533	0.00515825
10	10:27163017	27163017	T	G	0.163	-0.10807	0.0378168	1.02533	0.00515825
39	39:14478236	14478236	T	A	0.121	0.096075	0.0336543	1.03123	0.00516063
11	11:38623732	38623732	C	A	0.36	-0.0826078	0.0283655	0.947563	0.0051768
8	8:60034943	60034943	C	T	0.354	0.0815063	0.0285065	1.02014	0.00517754
1	1:38809131	38809131	C	A	0.103	-0.125904	0.0444316	1.19301	0.00518119
1	1:38811135	38811135	T	A	0.103	-0.125904	0.0444316	1.19301	0.00518119
11	11:25620034	25620034	A	G	0.121	-0.119228	0.0420102	1.06723	0.00520123
21	21:6229165	6229165	G	A	0.241	-0.0859483	0.0302768	1.06252	0.00522102
21	21:6671422	6671422	C	T	0.219	-0.0889611	0.031313	1.05231	0.00523966
21	21:6673247	6673247	T	C	0.219	-0.0889611	0.031313	1.05231	0.00523966
21	21:6690434	6690434	T	C	0.219	-0.0889611	0.031313	1.05231	0.00523966
21	21:6696717	6696717	C	T	0.219	-0.0889611	0.031313	1.05231	0.00523966
22	22:55400367	55400367	T	C	0.488	-0.0763645	0.0270338	1.13508	0.00524083
7	7:63263861	63263861	T	C	0.066	0.156158	0.0546334	1.01149	0.00524541
7	7:63308240	63308240	G	C	0.066	0.156158	0.0546334	1.01149	0.00524541
7	7:63313448	63313448	C	T	0.066	0.156158	0.0546334	1.01149	0.00524541
5	5:86633636	86633636	A	G	0.15	-0.106928	0.0377395	1.07233	0.00525561
37	37:27757217	27757217	C	T	0.174	0.102437	0.0361874	1.08041	0.00526082
37	37:24702123	24702123	C	T	0.356	0.0808864	0.0281883	0.991326	0.00526296
24	24:41651116	41651116	G	A	0.164	0.100442	0.0355517	1.10083	0.00527788
24	24:41666969	41666969	T	C	0.164	0.100442	0.0355517	1.10083	0.00527788
1	1:40636269	40636269	C	A	0.049	-0.166181	0.058371	1.25873	0.00527797
1	1:40647049	40647049	C	A	0.049	-0.166181	0.058371	1.25873	0.00527797
1	1:40651382	40651382	G	C	0.049	-0.166181	0.058371	1.25873	0.00527797
20	20:45783280	45783280	T	C	0.325	-0.0833223	0.0295347	1.118	0.00531523
10	10:27091871	27091871	T	C	0.163	-0.107872	0.0378768	1.02484	0.00531572
26	26:8212324	8212324	A	G	0.41	-0.0776668	0.0275391	1.12133	0.00532287
3	3:83793021	83793021	C	A	0.354	-0.0779775	0.0276405	1.10907	0.00533045
20	20:50996976	50996976	T	C	0.21	-0.094988	0.0335836	1.07053	0.00533866
37	37:2145160	2145160	A	G	0.484	0.0746289	0.0264809	1.11388	0.00536906
20	20:49647668	49647668	C	T	0.206	-0.0977788	0.0344469	1.03316	0.00538283
36	36:26908106	26908106	A	T	0.195	-0.0945109	0.0331651	1.01063	0.00539536
36	36:26914359	26914359	T	G	0.195	-0.0945109	0.0331651	1.01063	0.00539536
10	10:24403987	24403987	A	G	0.186	-0.102093	0.0361703	1.07633	0.00541138
10	10:24416228	24416228	G	A	0.186	-0.102093	0.0361703	1.07633	0.00541138
10	10:24418609	24418609	C	T	0.186	-0.102093	0.0361703	1.07633	0.00541138
10	10:24461789	24461789	C	T	0.186	-0.102093	0.0361703	1.07633	0.00541138
29	29:39299919	39299919	C	T	0.417	0.0760343	0.0263867	0.962333	0.00541319
7	7:64304555	64304555	C	T	0.063	0.15738	0.0555819	1.04662	0.00541493
26	26:8231315	8231315	T	C	0.408	-0.0776302	0.0275913	1.12386	0.00542607
8	8:59051723	59051723	T	C	0.296	0.0880137	0.0306972	0.978851	0.0054479
39	39:73826145	73826145	G	A	0.199	0.0749703	0.0265273	1.22851	0.00545087
39	39:73874664	73874664	G	A	0.199	0.0749703	0.0265273	1.22851	0.00545087
21	21:3582104	3582104	A	G	0.213	-0.0930564	0.0322179	0.949278	0.00545103
21	21:3653033	3653033	G	A	0.213	-0.0930564	0.0322179	0.949278	0.00545103
36	36:27233570	27233570	A	G	0.217	-0.0908309	0.0317877	0.990411	0.00545538
7	7:63605350	63605350	A	G	0.469	0.0777472	0.0276085	1.08674	0.00547998
7	7:63605553	63605553	T	G	0.469	0.0777472	0.0276085	1.08674	0.00547998
17	17:42797906	42797906	T	A	0.442	0.076948	0.0270785	1.01819	0.0054814
37	37:2831088	2831088	A	G	0.48	-0.0762402	0.0270679	1.08261	0.0054832
22	22:60794606	60794606	A	G	0.438	-0.0729198	0.0259102	1.09049	0.00548572
25	25:11594917	11594917	T	C	0.39	-0.0783381	0.0277786	1.06877	0.00549371
17	17:43431546	43431546	T	G	0.264	-0.0898512	0.0315273	1.00138	0.00549577
21	21:7284912	7284912	T	C	0.363	-0.0796359	0.0280664	1.02416	0.00550265
20	20:49644653	49644653	A	G	0.205	-0.0975074	0.034479	1.04042	0.00550439
17	17:42712684	42712684	A	G	0.449	0.0762347	0.0268885	1.02726	0.00550819
2	2:45461462	45461462	A	G	0.443	-0.0808958	0.0287911	1.11068	0.00551322
2	2:45481653	45481653	G	A	0.443	-0.0808958	0.0287911	1.11068	0.00551322
2	2:45491436	45491436	C	A	0.443	-0.0808958	0.0287911	1.11068	0.00551322
2	2:45549200	45549200	A	G	0.443	-0.0808958	0.0287911	1.11068	0.00551322
2	2:45767305	45767305	C	T	0.443	-0.0808958	0.0287911	1.11068	0.00551322
1	1:92052056	92052056	A	C	0.261	0.0926064	0.0328905	1.08019	0.00551751
11	11:38831855	38831855	G	A	0.428	-0.0812112	0.0272146	0.86307	0.00551998
21	21:18417471	18417471	G	T	0.248	0.0855967	0.0304726	1.17579	0.00552534
21	21:18428655	18428655	T	C	0.248	0.0855967	0.0304726	1.17579	0.00552534
12	12:46071743	46071743	T	A	0.379	0.0817072	0.0290963	1.17491	0.00553593
37	37:28750442	28750442	G	T	0.396	0.0764549	0.0269811	1.0248	0.00553799
4	4:30426316	30426316	A	C	0.154	0.110322	0.0385864	0.983181	0.00553891
4	4:30429526	30429526	C	T	0.154	0.110322	0.0385864	0.983181	0.00553891
3	3:89574330	89574330	C	T	0.074	-0.140924	0.0501666	1.10156	0.00554008
3	3:89772496	89772496	A	G	0.074	-0.140924	0.0501666	1.10156	0.00554008
3	3:89776076	89776076	A	G	0.074	-0.140924	0.0501666	1.10156	0.00554008
1	1:94847973	94847973	G	A	0.45	0.0788681	0.0279663	1.05844	0.00554288
1	1:94848563	94848563	T	C	0.45	0.0788681	0.0279663	1.05844	0.00554288
1	1:94865751	94865751	T	C	0.45	0.0788681	0.0279663	1.05844	0.00554288
19	19:10032057	10032057	G	T	0.145	-0.10863	0.038359	1.0295	0.00554402
20	20:45328773	45328773	G	A	0.356	-0.0812327	0.0288949	1.08804	0.00555017
37	37:25044004	25044004	C	A	0.423	0.0751305	0.0261101	0.956278	0.0055613
30	30:9370981	9370981	T	C	0.393	0.0807784	0.0287959	1.15915	0.00556164
30	30:9377223	9377223	T	C	0.393	0.0807784	0.0287959	1.15915	0.00556164
30	30:9401320	9401320	C	T	0.393	0.0807784	0.0287959	1.15915	0.00556164
30	30:9406911	9406911	C	T	0.393	0.0807784	0.0287959	1.15915	0.00556164
30	30:9430227	9430227	A	G	0.393	0.0807784	0.0287959	1.15915	0.00556164
31	31:10533347	10533347	C	G	0.241	-0.0899331	0.0319659	1.07372	0.00557474
12	12:46510410	46510410	A	G	0.18	0.104697	0.0373092	1.10804	0.0055783
11	11:36489257	36489257	A	G	0.405	0.0790361	0.0281703	1.17615	0.00558189
8	8:59330932	59330932	T	C	0.298	0.0876351	0.0307038	0.986001	0.00558194
37	37:29560564	29560564	T	C	0.271	-0.0812337	0.0289773	1.12554	0.00558933
37	37:29561159	29561159	T	G	0.271	-0.0812337	0.0289773	1.12554	0.00558933
37	37:29562399	29562399	T	C	0.271	-0.0812337	0.0289773	1.12554	0.00558933
37	37:29072288	29072288	C	T	0.385	0.0752331	0.0268013	1.09164	0.00559924
37	37:24641253	24641253	T	C	0.356	0.080378	0.0283698	1.01849	0.00560061
37	37:2186621	2186621	T	C	0.485	0.0740744	0.0264231	1.11873	0.00560163
10	10:27111033	27111033	G	A	0.162	-0.107178	0.0379055	1.03079	0.00560303
25	25:12096514	12096514	G	C	0.08	0.132543	0.046809	1.02076	0.00561757
25	25:12134869	12134869	A	G	0.08	0.132543	0.046809	1.02076	0.00561757
39	39:47352044	47352044	T	C	0.17	0.077951	0.0277369	1.20914	0.00561785
37	37:3446049	3446049	C	A	0.485	-0.0758263	0.0270213	1.09019	0.00562721
30	30:12022940	12022940	T	C	0.35	0.0844635	0.0299848	1.05163	0.0056481
38	38:23031124	23031124	A	T	0.46	-0.0749351	0.0267682	1.13911	0.00564822
23	23:35317713	35317713	C	T	0.446	0.0762514	0.027238	1.14807	0.00564913
23	23:35320203	35320203	G	A	0.446	0.0762514	0.027238	1.14807	0.00564913
39	39:33272739	33272739	G	A	0.128	-0.0892542	0.0318316	1.0923	0.00565176
21	21:450257	450257	A	C	0.277	-0.082848	0.029191	1.00358	0.00566805
6	6:77029918	77029918	C	A	0.346	0.0752066	0.0268784	1.1439	0.00567147
10	10:26356678	26356678	G	C	0.179	-0.102645	0.0365185	1.06339	0.00567157
10	10:26412264	26412264	A	G	0.179	-0.102645	0.0365185	1.06339	0.00567157
10	10:26574103	26574103	A	C	0.179	-0.102645	0.0365185	1.06339	0.00567157
37	37:28134726	28134726	T	C	0.171	0.103648	0.0366264	1.01683	0.00567475
20	20:51185039	51185039	T	C	0.201	-0.0967067	0.034473	1.07636	0.0056922
20	20:51193831	51193831	T	C	0.201	-0.0967067	0.034473	1.07636	0.0056922
11	11:44436868	44436868	T	C	0.229	0.0957252	0.0334344	0.966433	0.00571486
4	4:51665788	51665788	G	C	0.447	-0.0808863	0.028836	1.07303	0.00572186
4	4:51701328	51701328	T	C	0.447	-0.0808863	0.028836	1.07303	0.00572186
30	30:10035434	10035434	C	G	0.432	0.0765794	0.0269309	0.990358	0.00572614
11	11:23521576	23521576	A	G	0.204	0.0906791	0.0319285	0.993699	0.00573389
11	11:23536433	23536433	C	T	0.204	0.0906791	0.0319285	0.993699	0.00573389
11	11:23556799	23556799	A	G	0.204	0.0906791	0.0319285	0.993699	0.00573389
17	17:41534723	41534723	A	C	0.466	0.0763012	0.0271457	1.05203	0.00573482
17	17:41544375	41544375	C	T	0.466	0.0763012	0.0271457	1.05203	0.00573482
17	17:41549531	41549531	C	A	0.466	0.0763012	0.0271457	1.05203	0.00573482
31	31:25277084	25277084	G	A	0.215	0.0925985	0.0323645	0.964009	0.0057366
22	22:60838313	60838313	T	C	0.438	-0.072515	0.025889	1.08205	0.00573913
20	20:45785499	45785499	A	G	0.355	-0.0804211	0.0287438	1.09838	0.00574061
37	37:24058482	24058482	G	A	0.483	-0.0771637	0.0274843	1.0583	0.00574538
1	1:13853992	13853992	T	C	0.076	0.147409	0.0519722	1.29866	0.00575302
1	1:13856774	13856774	T	C	0.076	0.147409	0.0519722	1.29866	0.00575302
1	1:13892732	13892732	T	G	0.076	0.147409	0.0519722	1.29866	0.00575302
1	1:13910163	13910163	A	T	0.076	0.147409	0.0519722	1.29866	0.00575302
1	1:13912662	13912662	C	T	0.076	0.147409	0.0519722	1.29866	0.00575302
1	1:13966852	13966852	G	A	0.076	0.147409	0.0519722	1.29866	0.00575302
1	1:13967960	13967960	C	A	0.076	0.147409	0.0519722	1.29866	0.00575302
1	1:13988286	13988286	T	C	0.076	0.147409	0.0519722	1.29866	0.00575302
21	21:50526210	50526210	G	T	0.25	-0.085718	0.0306567	1.17972	0.0057537
20	20:49040203	49040203	A	G	0.077	-0.136138	0.0486575	1.19407	0.00576429
20	20:49209171	49209171	G	T	0.077	-0.136138	0.0486575	1.19407	0.00576429
20	20:49216227	49216227	T	A	0.077	-0.136138	0.0486575	1.19407	0.00576429
20	20:49238825	49238825	A	G	0.077	-0.136138	0.0486575	1.19407	0.00576429
20	20:49247707	49247707	A	G	0.077	-0.136138	0.0486575	1.19407	0.00576429
20	20:49252732	49252732	C	G	0.077	-0.136138	0.0486575	1.19407	0.00576429
20	20:49351378	49351378	T	C	0.077	-0.136138	0.0486575	1.19407	0.00576429
20	20:49351896	49351896	G	A	0.077	-0.136138	0.0486575	1.19407	0.00576429
30	30:11558367	11558367	A	C	0.223	0.0970151	0.0343984	1.02592	0.00577267
15	15:23892228	23892228	G	A	0.079	-0.136788	0.0488695	1.08271	0.00577312
15	15:23922944	23922944	C	T	0.079	-0.136788	0.0488695	1.08271	0.00577312
15	15:23934129	23934129	G	A	0.079	-0.136788	0.0488695	1.08271	0.00577312
12	12:71601595	71601595	C	T	0.223	-0.0874494	0.0312747	1.09228	0.00577679
19	19:36115864	36115864	C	A	0.291	0.0801196	0.0285277	1.05146	0.00578385
30	30:11506689	11506689	G	A	0.222	0.0970882	0.034402	1.02069	0.00578685
36	36:22348001	22348001	C	T	0.459	-0.0742101	0.0262214	1.00564	0.00578708
30	30:13018273	13018273	G	C	0.279	0.0857913	0.0305039	1.04014	0.00578781
8	8:49788291	49788291	T	C	0.305	0.0819585	0.0293664	1.16532	0.00580958
4	4:35365398	35365398	A	G	0.374	0.0843048	0.0301956	1.17739	0.00581093
6	6:76958450	76958450	A	T	0.312	0.0768356	0.0275091	1.10015	0.00581113
22	22:60522339	60522339	G	C	0.273	0.0798196	0.0283683	1.03414	0.00581193
8	8:60306512	60306512	T	C	0.354	0.0809211	0.0286018	1.00408	0.00581727
17	17:40497959	40497959	C	T	0.455	0.075389	0.026933	1.07152	0.00582182
18	18:50010505	50010505	G	A	0.479	-0.0755461	0.0270694	1.11138	0.00582305
18	18:50027227	50027227	T	C	0.479	-0.0755461	0.0270694	1.11138	0.00582305
1	1:94843607	94843607	A	G	0.451	0.0781078	0.0278842	1.06451	0.00582854
21	21:2257132	2257132	T	A	0.251	-0.0861931	0.0305859	1.02207	0.00583249
23	23:35301147	35301147	T	C	0.459	0.0755912	0.0271071	1.1558	0.00583789
1	1:94013778	94013778	G	A	0.466	0.0795404	0.0284188	1.06712	0.00585347
1	1:94041027	94041027	C	T	0.466	0.0795404	0.0284188	1.06712	0.00585347
4	4:35945272	35945272	G	A	0.353	0.0844791	0.0303008	1.16421	0.00585584
4	4:35951157	35951157	T	C	0.353	0.0844791	0.0303008	1.16421	0.00585584
4	4:35954677	35954677	T	G	0.353	0.0844791	0.0303008	1.16421	0.00585584
4	4:35955496	35955496	A	G	0.353	0.0844791	0.0303008	1.16421	0.00585584
1	1:92075451	92075451	G	A	0.243	0.0947245	0.0338048	1.05971	0.00585677
1	1:92092945	92092945	A	G	0.243	0.0947245	0.0338048	1.05971	0.00585677
1	1:92115077	92115077	G	A	0.243	0.0947245	0.0338048	1.05971	0.00585677
1	1:92129478	92129478	C	G	0.243	0.0947245	0.0338048	1.05971	0.00585677
1	1:92143430	92143430	A	G	0.243	0.0947245	0.0338048	1.05971	0.00585677
1	1:92253889	92253889	T	C	0.243	0.0947245	0.0338048	1.05971	0.00585677
1	1:92322449	92322449	A	G	0.243	0.0947245	0.0338048	1.05971	0.00585677
1	1:92324060	92324060	A	G	0.243	0.0947245	0.0338048	1.05971	0.00585677
1	1:92327100	92327100	A	C	0.243	0.0947245	0.0338048	1.05971	0.00585677
1	1:92359977	92359977	G	A	0.243	0.0947245	0.0338048	1.05971	0.00585677
1	1:92367486	92367486	A	G	0.243	0.0947245	0.0338048	1.05971	0.00585677
21	21:6676758	6676758	A	G	0.118	-0.110349	0.0389366	0.991079	0.00586214
26	26:11468901	11468901	A	G	0.412	0.0776653	0.0278517	1.11109	0.00586399
26	26:11471213	11471213	A	G	0.412	0.0776653	0.0278517	1.11109	0.00586399
1	1:104655381	104655381	G	C	0.078	0.135083	0.0484355	1.17786	0.00587009
1	1:104668790	104668790	G	C	0.078	0.135083	0.0484355	1.17786	0.00587009
39	39:87461300	87461300	A	G	0.45	-0.0603712	0.0216684	1.15318	0.00587878
31	31:24395032	24395032	A	G	0.226	0.0858022	0.0305813	1.0427	0.0058796
11	11:36360340	36360340	C	T	0.462	-0.0789807	0.0283495	1.15317	0.00588077
10	10:25132439	25132439	A	C	0.184	-0.101136	0.0362125	1.07958	0.00589451
17	17:42742990	42742990	A	G	0.451	0.0758254	0.0269975	1.0334	0.00591042
22	22:55413559	55413559	C	T	0.486	-0.0750886	0.0269714	1.13293	0.00591356
12	12:70662153	70662153	A	G	0.165	-0.104452	0.0374982	1.17943	0.00593254
33	33:14177173	14177173	A	G	0.141	0.106008	0.0380332	1.09322	0.0059334
4	4:35486652	35486652	C	T	0.38	0.0840407	0.0301913	1.1679	0.00593769
4	4:35517597	35517597	A	G	0.38	0.0840407	0.0301913	1.1679	0.00593769
15	15:41060552	41060552	C	A	0.052	0.168146	0.0597423	1.01567	0.0059384
20	20:51201822	51201822	C	A	0.295	-0.0841822	0.0302508	1.16166	0.00594574
11	11:22048959	22048959	A	G	0.273	0.0833493	0.0293536	0.974004	0.00597303
34	34:8325065	8325065	C	T	0.176	-0.0959801	0.0345088	1.1642	0.00597625
12	12:46521470	46521470	C	G	0.182	0.103635	0.0372694	1.12368	0.00598333
32	32:12006130	12006130	T	C	0.093	0.131044	0.0465264	1.28333	0.00599327
32	32:12008818	12008818	G	T	0.093	0.131044	0.0465264	1.28333	0.00599327
6	6:76958817	76958817	C	T	0.313	0.0766089	0.0275438	1.10661	0.00599862
1	1:118413346	118413346	T	C	0.2	0.0924678	0.0332708	1.15979	0.00600557
17	17:40547076	40547076	G	A	0.415	-0.078068	0.0279081	1.04558	0.00600968
11	11:36465116	36465116	T	C	0.469	0.077729	0.0279717	1.12187	0.00601908
4	4:35599789	35599789	T	C	0.199	0.0940357	0.0337942	1.09051	0.00602843
20	20:51185707	51185707	A	G	0.2	-0.0958551	0.0344206	1.0799	0.00603012
13	13:21653311	21653311	C	A	0.121	0.115797	0.0404588	0.940658	0.00603625
15	15:42429752	42429752	T	C	0.181	-0.099413	0.0357011	1.07673	0.0060438
8	8:65069663	65069663	G	A	0.406	0.0801001	0.0278509	0.926849	0.00604423
17	17:41833867	41833867	G	A	0.273	-0.0869417	0.0304466	0.950958	0.00604888
30	30:12963156	12963156	A	T	0.281	0.085262	0.030519	1.04855	0.00605495
30	30:12978722	12978722	T	C	0.281	0.085262	0.030519	1.04855	0.00605495
36	36:15929801	15929801	G	A	0.186	-0.0986814	0.0355486	1.11963	0.00606981
20	20:45681393	45681393	A	G	0.327	-0.0825108	0.0296866	1.09469	0.0060724
22	22:20033079	20033079	T	C	0.276	-0.082515	0.029706	1.104	0.00607303
4	4:29810055	29810055	C	T	0.156	0.108236	0.0384176	0.999329	0.00607947
4	4:29835416	29835416	G	A	0.156	0.108236	0.0384176	0.999329	0.00607947
4	4:29852717	29852717	T	C	0.156	0.108236	0.0384176	0.999329	0.00607947
4	4:29857492	29857492	C	T	0.156	0.108236	0.0384176	0.999329	0.00607947
39	39:41647470	41647470	T	C	0.467	0.0596209	0.0214248	1.0768	0.00607963
21	21:17757491	17757491	C	G	0.21	0.0878513	0.0316646	1.1353	0.00608046
11	11:44924662	44924662	C	T	0.219	0.0950878	0.0336718	0.990532	0.00609065
11	11:44967009	44967009	C	T	0.219	0.0950878	0.0336718	0.990532	0.00609065
22	22:55176493	55176493	C	T	0.457	-0.0742936	0.0267666	1.17315	0.00609263
7	7:63523486	63523486	T	G	0.464	0.0769895	0.0276689	1.07644	0.00609773
21	21:18755117	18755117	G	A	0.174	0.0964468	0.0347632	1.17277	0.00611286
4	4:54211938	54211938	A	G	0.062	0.150878	0.0543405	1.09383	0.00612364
31	31:10638255	10638255	A	G	0.24	-0.0887778	0.0319109	1.07216	0.00612372
22	22:56782605	56782605	T	C	0.516	-0.074998	0.0268308	1.03533	0.00612718
5	5:13747682	13747682	T	C	0.188	0.0968318	0.0349411	1.14154	0.00613573
17	17:40553672	40553672	G	A	0.426	-0.0766429	0.0275266	1.06097	0.00614242
26	26:11952554	11952554	T	C	0.448	0.076319	0.0273118	1.03494	0.00614509
29	29:39307357	39307357	C	T	0.419	0.0749838	0.0263837	0.95895	0.00614917
36	36:24897509	24897509	T	C	0.343	-0.0784628	0.0280952	1.03678	0.00615274
4	4:52181254	52181254	C	A	0.412	-0.0796846	0.0287099	1.09118	0.00615957
37	37:24208105	24208105	A	G	0.403	0.0760766	0.0274635	1.15011	0.00615975
37	37:24208577	24208577	A	G	0.403	0.0760766	0.0274635	1.15011	0.00615975
11	11:38663027	38663027	C	T	0.353	0.0818569	0.0295444	1.11935	0.00616697
11	11:38669717	38669717	T	C	0.353	0.0818569	0.0295444	1.11935	0.00616697
1	1:92413389	92413389	G	A	0.243	0.0936943	0.033657	1.06016	0.00617685
8	8:59219166	59219166	A	G	0.456	0.0809029	0.0282952	0.937436	0.00618266
23	23:49085483	49085483	A	G	0.27	0.0836429	0.0301965	1.10585	0.00620006
17	17:29136734	29136734	G	C	0.163	-0.102472	0.0370198	1.15697	0.00620272
5	5:13671014	13671014	A	C	0.188	0.0965689	0.0348931	1.1436	0.00620315
5	5:13672352	13672352	T	C	0.188	0.0965689	0.0348931	1.1436	0.00620315
5	5:13698241	13698241	G	A	0.188	0.0965689	0.0348931	1.1436	0.00620315
28	28:29664504	29664504	A	T	0.314	-0.0786019	0.0282757	1.06305	0.0062103
7	7:79986470	79986470	A	G	0.19	-0.087536	0.0315044	1.0659	0.00622024
22	22:55091850	55091850	A	G	0.455	-0.0745244	0.026891	1.19464	0.00623119
22	22:55101565	55101565	A	G	0.455	-0.0745244	0.026891	1.19464	0.00623119
4	4:52177329	52177329	A	G	0.411	-0.0797944	0.0287992	1.09507	0.00623242
7	7:63427980	63427980	G	A	0.484	0.076476	0.0276018	1.09432	0.00623609
17	17:40574603	40574603	A	T	0.259	-0.0877968	0.0308152	0.945522	0.00624905
17	17:40583437	40583437	G	A	0.259	-0.0877968	0.0308152	0.945522	0.00624905
26	26:8066615	8066615	A	G	0.432	-0.0739633	0.0267382	1.16715	0.00625095
30	30:12884062	12884062	T	G	0.282	0.0848099	0.0304994	1.05394	0.00625415
20	20:49327135	49327135	C	T	0.076	-0.135675	0.048939	1.20484	0.00625766
7	7:62708002	62708002	A	C	0.061	0.157699	0.0562415	1.00292	0.00625891
11	11:21782163	21782163	C	T	0.285	0.0825371	0.0294863	1.01221	0.00626018
22	22:55033814	55033814	C	G	0.295	0.0809687	0.0292923	1.13682	0.00626608
10	10:27317038	27317038	G	A	0.162	-0.105792	0.0378645	1.02191	0.00626961
37	37:24567179	24567179	A	G	0.404	0.072685	0.0262362	1.08259	0.00627514
36	36:22326002	22326002	T	C	0.456	-0.0734664	0.0261001	0.98707	0.00627579
36	36:22326458	22326458	T	C	0.456	-0.0734664	0.0261001	0.98707	0.00627579
36	36:22326495	22326495	C	T	0.456	-0.0734664	0.0261001	0.98707	0.00627579
19	19:35396348	35396348	G	C	0.402	0.0754792	0.0270716	1.03317	0.00627852
19	19:35434011	35434011	T	C	0.402	0.0754792	0.0270716	1.03317	0.00627852
21	21:1216051	1216051	T	C	0.233	-0.0847137	0.0302854	1.01568	0.00628138
22	22:56291459	56291459	T	C	0.42	0.0757584	0.0273201	1.07133	0.00628514
27	27:15052041	15052041	A	G	0.288	-0.0834869	0.0295386	1.33413	0.00628922
29	29:38535633	38535633	A	G	0.143	0.101995	0.036861	1.09091	0.00630443
1	1:41181620	41181620	A	G	0.064	-0.145773	0.0527062	1.18623	0.00630771
30	30:24736457	24736457	C	T	0.333	0.081431	0.0286443	0.947766	0.00630797
37	37:29664811	29664811	T	C	0.274	-0.0797282	0.0288608	1.11645	0.00631574
4	4:31701999	31701999	A	G	0.106	0.121327	0.0432651	0.998739	0.00631886
21	21:20052875	20052875	T	C	0.377	0.0782498	0.0283328	1.16035	0.00631988
17	17:41749809	41749809	A	G	0.271	-0.086321	0.0304352	0.956093	0.00632822
37	37:3519449	3519449	C	T	0.393	0.0766801	0.0274795	1.02133	0.0063607
37	37:3546089	3546089	C	A	0.393	0.0766801	0.0274795	1.02133	0.0063607
37	37:3559226	3559226	C	T	0.393	0.0766801	0.0274795	1.02133	0.0063607
18	18:50030527	50030527	C	A	0.479	-0.0743294	0.0269216	1.10886	0.00636252
39	39:32711251	32711251	A	G	0.12	-0.090896	0.0329428	1.12112	0.00637079
39	39:32872414	32872414	C	T	0.12	-0.090896	0.0329428	1.12112	0.00637079
39	39:32873212	32873212	C	T	0.12	-0.090896	0.0329428	1.12112	0.00637079
39	39:33013587	33013587	T	G	0.12	-0.090896	0.0329428	1.12112	0.00637079
22	22:55173145	55173145	C	T	0.456	-0.0741373	0.0268523	1.17926	0.00637528
37	37:3239463	3239463	A	G	0.393	0.0772045	0.027646	1.01606	0.00637579
12	12:45958182	45958182	C	T	0.17	0.105687	0.0382885	1.11068	0.00637877
30	30:9277796	9277796	G	A	0.433	0.0753645	0.0268597	0.992628	0.00638046
1	1:85843694	85843694	C	T	0.256	0.0841583	0.030264	1.03722	0.00638248
17	17:62591310	62591310	C	T	0.387	0.0740553	0.0268529	1.13288	0.00638511
17	17:62591941	62591941	T	C	0.387	0.0740553	0.0268529	1.13288	0.00638511
36	36:25282702	25282702	T	C	0.417	-0.0764965	0.0271021	0.966534	0.00638785
37	37:23924979	23924979	C	T	0.467	0.0742749	0.0269146	1.17975	0.00640208
22	22:55035982	55035982	G	A	0.296	0.0807819	0.0293036	1.14158	0.00640303
22	22:55045189	55045189	T	C	0.296	0.0807819	0.0293036	1.14158	0.00640303
13	13:23651781	23651781	T	A	0.498	0.0743674	0.0266366	1.01269	0.00640375
37	37:3901421	3901421	C	T	0.382	0.0761418	0.0273818	1.03584	0.00640581
37	37:3990284	3990284	C	T	0.382	0.0761418	0.0273818	1.03584	0.00640581
16	16:58276517	58276517	G	A	0.381	-0.0754177	0.0273443	1.17333	0.00641256
18	18:50047622	50047622	G	A	0.479	-0.0742079	0.0269011	1.10668	0.00641302
18	18:50049300	50049300	G	A	0.479	-0.0742079	0.0269011	1.10668	0.00641302
39	39:35860374	35860374	G	A	0.376	0.0608474	0.0220387	1.08952	0.00642302
20	20:49839474	49839474	G	T	0.242	-0.0914155	0.0330001	1.0546	0.00643578
20	20:49868201	49868201	C	T	0.242	-0.0914155	0.0330001	1.0546	0.00643578
20	20:49923392	49923392	C	T	0.242	-0.0914155	0.0330001	1.0546	0.00643578
20	20:49815220	49815220	T	C	0.208	-0.0949786	0.0342844	1.05248	0.00644045
36	36:23419408	23419408	C	T	0.486	0.0742186	0.0267054	1.0332	0.00644156
36	36:23421584	23421584	G	A	0.486	0.0742186	0.0267054	1.0332	0.00644156
37	37:29628498	29628498	C	T	0.275	-0.0796923	0.0289056	1.1058	0.00644218
7	7:64960270	64960270	T	C	0.052	0.171893	0.0623295	1.18374	0.00644618
7	7:64969522	64969522	A	G	0.052	0.171893	0.0623295	1.18374	0.00644618
37	37:26241381	26241381	C	T	0.13	-0.104594	0.0378943	1.08442	0.0064577
9	9:60136081	60136081	G	A	0.438	-0.0738908	0.0268315	1.15197	0.00646054
37	37:2280278	2280278	C	T	0.373	0.0753624	0.0271657	1.04299	0.00647364
37	37:2300213	2300213	T	C	0.373	0.0753624	0.0271657	1.04299	0.00647364
37	37:2675390	2675390	T	C	0.373	0.0753624	0.0271657	1.04299	0.00647364
37	37:2691610	2691610	A	C	0.373	0.0753624	0.0271657	1.04299	0.00647364
37	37:2693672	2693672	C	T	0.373	0.0753624	0.0271657	1.04299	0.00647364
37	37:2701570	2701570	C	T	0.373	0.0753624	0.0271657	1.04299	0.00647364
37	37:2702550	2702550	C	T	0.373	0.0753624	0.0271657	1.04299	0.00647364
25	25:11418127	11418127	A	G	0.389	-0.0768177	0.0277827	1.06709	0.00647479
25	25:11443969	11443969	C	G	0.389	-0.0768177	0.0277827	1.06709	0.00647479
25	25:11472579	11472579	G	A	0.389	-0.0768177	0.0277827	1.06709	0.00647479
25	25:11506208	11506208	G	A	0.389	-0.0768177	0.0277827	1.06709	0.00647479
25	25:11522008	11522008	A	C	0.389	-0.0768177	0.0277827	1.06709	0.00647479
25	25:11554538	11554538	C	T	0.389	-0.0768177	0.0277827	1.06709	0.00647479
25	25:11595073	11595073	C	T	0.389	-0.0768177	0.0277827	1.06709	0.00647479
25	25:11628142	11628142	G	T	0.389	-0.0768177	0.0277827	1.06709	0.00647479
23	23:48069855	48069855	T	C	0.092	0.130892	0.0473185	1.05807	0.0064806
39	39:70322728	70322728	A	G	0.371	0.0607398	0.0218674	1.03096	0.00648895
39	39:70523483	70523483	G	A	0.371	0.0607398	0.0218674	1.03096	0.00648895
39	39:70530594	70530594	C	T	0.371	0.0607398	0.0218674	1.03096	0.00648895
39	39:70587689	70587689	G	A	0.371	0.0607398	0.0218674	1.03096	0.00648895
20	20:51256858	51256858	A	G	0.294	-0.083225	0.030226	1.16766	0.00649072
17	17:50740384	50740384	C	T	0.36	0.0785472	0.0284632	1.07985	0.00650113
39	39:32606333	32606333	A	G	0.12	-0.0905942	0.0329182	1.11698	0.00651134
39	39:32608065	32608065	T	G	0.12	-0.0905942	0.0329182	1.11698	0.00651134
31	31:12851799	12851799	T	G	0.242	-0.0904794	0.0328077	1.08331	0.00651565
15	15:20022164	20022164	T	C	0.193	-0.0982533	0.0352755	1.01355	0.00652627
6	6:33846382	33846382	C	T	0.276	-0.0866726	0.0310395	0.997656	0.00656588
6	6:33853385	33853385	A	G	0.276	-0.0866726	0.0310395	0.997656	0.00656588
6	6:33854280	33854280	C	T	0.276	-0.0866726	0.0310395	0.997656	0.00656588
6	6:34084568	34084568	C	T	0.276	-0.0866726	0.0310395	0.997656	0.00656588
13	13:21307764	21307764	C	G	0.12	0.116066	0.0410909	0.95246	0.00657419
13	13:21313939	21313939	A	C	0.12	0.116066	0.0410909	0.95246	0.00657419
13	13:21316041	21316041	G	A	0.12	0.116066	0.0410909	0.95246	0.00657419
13	13:21326928	21326928	T	G	0.12	0.116066	0.0410909	0.95246	0.00657419
12	12:46687732	46687732	C	G	0.183	0.102255	0.0372104	1.13099	0.00657481
22	22:55068099	55068099	T	C	0.452	-0.074096	0.0268996	1.20213	0.00657615
20	20:51364469	51364469	G	A	0.242	-0.088331	0.0321464	1.15149	0.00657624
20	20:51379809	51379809	A	G	0.242	-0.088331	0.0321464	1.15149	0.00657624
33	33:26133674	26133674	T	C	0.247	0.083042	0.0302349	1.14688	0.00659663
20	20:52350963	52350963	G	A	0.248	-0.0857874	0.0311986	1.09923	0.00660178
20	20:52353029	52353029	A	G	0.248	-0.0857874	0.0311986	1.09923	0.00660178
25	25:24399858	24399858	G	A	0.433	0.0745166	0.0271109	1.17901	0.00660503
26	26:11478902	11478902	T	C	0.413	0.0766991	0.0279095	1.10799	0.00660861
39	39:68773165	68773165	C	A	0.454	0.0593324	0.0213215	1.00915	0.00661895
29	29:39304877	39304877	A	G	0.455	0.0725109	0.0259866	0.996368	0.00661969
15	15:18324069	18324069	G	A	0.083	-0.132289	0.0479153	1.05587	0.00662076
15	15:19721380	19721380	T	C	0.083	-0.132289	0.0479153	1.05587	0.00662076
37	37:23218013	23218013	T	C	0.32	0.0792358	0.0283989	0.993987	0.00662829
36	36:27917289	27917289	C	T	0.229	-0.0866496	0.0314588	1.07169	0.00662931
22	22:3635773	3635773	C	T	0.406	0.0786638	0.0278511	0.950567	0.00663125
22	22:3704499	3704499	T	C	0.406	0.0786638	0.0278511	0.950567	0.00663125
20	20:7903596	7903596	G	A	0.109	0.119863	0.0427489	0.974673	0.0066361
19	19:36674298	36674298	C	A	0.284	0.0804504	0.0291514	1.0569	0.00663666
25	25:11952913	11952913	A	G	0.081	0.129422	0.0467196	1.03065	0.00663921
25	25:11960065	11960065	C	T	0.081	0.129422	0.0467196	1.03065	0.00663921
37	37:23369586	23369586	C	T	0.267	0.0833781	0.0303827	1.14325	0.00663956
39	39:69620866	69620866	G	T	0.373	0.0603404	0.021836	1.04539	0.00664046
39	39:69716885	69716885	T	C	0.373	0.0603404	0.021836	1.04539	0.00664046
39	39:70120804	70120804	A	T	0.373	0.0603404	0.021836	1.04539	0.00664046
39	39:70194244	70194244	T	C	0.373	0.0603404	0.021836	1.04539	0.00664046
39	39:70277585	70277585	T	G	0.373	0.0603404	0.021836	1.04539	0.00664046
39	39:70296297	70296297	G	T	0.373	0.0603404	0.021836	1.04539	0.00664046
31	31:10311441	10311441	A	T	0.468	0.0745449	0.0270406	1.06359	0.00664075
37	37:3465020	3465020	C	T	0.394	0.0762255	0.0274716	1.02311	0.00664366
10	10:26621185	26621185	A	G	0.176	-0.101815	0.0369698	1.07264	0.00664569
15	15:42221932	42221932	A	G	0.167	-0.0979099	0.0356421	1.10058	0.00664861
15	15:42222368	42222368	T	C	0.167	-0.0979099	0.0356421	1.10058	0.00664861
15	15:42224289	42224289	T	C	0.167	-0.0979099	0.0356421	1.10058	0.00664861
37	37:22788379	22788379	A	T	0.154	0.100013	0.0363516	1.0796	0.00664954
27	27:42321151	42321151	C	T	0.468	-0.0747307	0.0269608	1.02629	0.00665647
21	21:1574309	1574309	C	T	0.233	-0.0843087	0.0303352	1.01261	0.0066585
19	19:36745544	36745544	C	T	0.3	0.0795723	0.0289004	1.07219	0.00666309
12	12:46110420	46110420	T	C	0.171	0.105064	0.0382992	1.11634	0.00669035
12	12:46460807	46460807	G	A	0.379	0.0792116	0.0288905	1.15756	0.00669668
17	17:62306940	62306940	T	C	0.117	-0.11202	0.0408534	1.12008	0.00670003
12	12:46135066	46135066	G	A	0.171	0.104811	0.0382161	1.11652	0.00670238
18	18:50030091	50030091	A	G	0.477	-0.0740576	0.0270007	1.1108	0.00670384
14	14:58185900	58185900	T	C	0.153	-0.101362	0.0369716	1.16009	0.00670494
14	14:58186898	58186898	C	T	0.153	-0.101362	0.0369716	1.16009	0.00670494
26	26:11913397	11913397	C	T	0.48	0.074588	0.0271193	1.07155	0.00671529
8	8:50458204	50458204	A	G	0.25	0.0864431	0.0315175	1.10761	0.00671631
39	39:49101161	49101161	A	G	0.205	0.0724849	0.0262981	1.2323	0.00672224
39	39:49538809	49538809	T	C	0.205	0.0724849	0.0262981	1.2323	0.00672224
39	39:53611267	53611267	T	G	0.205	0.0724849	0.0262981	1.2323	0.00672224
39	39:53627370	53627370	C	A	0.205	0.0724849	0.0262981	1.2323	0.00672224
12	12:70670306	70670306	C	T	0.269	-0.0800962	0.0292264	1.11393	0.00673808
21	21:157127	157127	C	T	0.232	-0.0845185	0.030488	1.01755	0.00674017
21	21:191004	191004	A	G	0.232	-0.0845185	0.030488	1.01755	0.00674017
37	37:3526581	3526581	C	G	0.394	0.0757557	0.0273695	1.02669	0.00674174
2	2:44169589	44169589	C	T	0.343	-0.0839287	0.0304524	1.0517	0.00674677
36	36:24059627	24059627	A	G	0.31	0.0805589	0.0290009	1.00541	0.00674856
4	4:37980296	37980296	C	T	0.337	0.0797322	0.0291012	1.11767	0.00675299
24	24:41909883	41909883	G	A	0.182	0.0942901	0.0342846	1.06259	0.00676028
1	1:40716378	40716378	G	T	0.089	-0.126859	0.0461593	1.22013	0.00679665
14	14:58107377	58107377	A	G	0.152	-0.101973	0.0372508	1.16747	0.00679971
14	14:58109406	58109406	A	G	0.152	-0.101973	0.0372508	1.16747	0.00679971
37	37:29262995	29262995	C	T	0.313	-0.0770747	0.0280762	1.07351	0.0068005
37	37:4336181	4336181	G	A	0.385	0.0752077	0.0272704	1.04099	0.00680456
36	36:26770342	26770342	T	G	0.19	-0.0934882	0.0337803	1.01804	0.00680511
36	36:26773696	26773696	T	C	0.19	-0.0934882	0.0337803	1.01804	0.00680511
36	36:26775647	26775647	C	T	0.19	-0.0934882	0.0337803	1.01804	0.00680511
31	31:13843444	13843444	G	A	0.213	-0.0972525	0.035383	1.06387	0.00680662
26	26:11459618	11459618	G	A	0.436	0.0756966	0.0276708	1.13447	0.00681044
19	19:14072055	14072055	T	C	0.147	-0.105376	0.0383777	1.07115	0.00681162
25	25:14035436	14035436	A	C	0.198	-0.0853818	0.0312138	1.13119	0.00681473
36	36:25159197	25159197	T	G	0.429	-0.0741925	0.0265997	0.982083	0.00682134
10	10:26706973	26706973	A	G	0.176	-0.101514	0.0369607	1.06763	0.00682257
29	29:37109568	37109568	A	G	0.152	0.101977	0.0372139	1.19703	0.00683433
8	8:66112960	66112960	G	A	0.406	0.0804079	0.0288955	0.989934	0.00684755
12	12:70978405	70978405	A	T	0.205	-0.0896754	0.0324413	1.01981	0.00685061
17	17:40602191	40602191	T	C	0.261	-0.0855674	0.0302163	0.931985	0.00685175
17	17:40602409	40602409	A	T	0.261	-0.0855674	0.0302163	0.931985	0.00685175
17	17:40642199	40642199	G	A	0.261	-0.0855674	0.0302163	0.931985	0.00685175
36	36:27917913	27917913	G	C	0.25	-0.0846011	0.0307926	1.05745	0.00685601
4	4:53300284	53300284	C	T	0.229	0.0834855	0.0304944	1.09168	0.00686668
34	34:38869798	38869798	T	C	0.489	0.0715368	0.02617	1.16735	0.00687723
23	23:35688536	35688536	A	C	0.34	0.0775363	0.0283375	1.09358	0.0068882
16	16:46429620	46429620	C	T	0.122	-0.110144	0.0402621	1.09229	0.00690485
22	22:61049732	61049732	A	G	0.252	-0.0802526	0.0293875	1.1289	0.00690795
22	22:61060910	61060910	A	C	0.252	-0.0802526	0.0293875	1.1289	0.00690795
11	11:23575600	23575600	A	G	0.354	0.0772288	0.0274923	0.951565	0.00692053
16	16:43296496	43296496	A	G	0.074	0.135951	0.0497995	1.12998	0.0069258
39	39:70934122	70934122	A	G	0.429	0.0582674	0.0212583	1.0675	0.00692857
37	37:30681465	30681465	T	C	0.303	0.074166	0.0271304	1.09256	0.00694121
1	1:13739416	13739416	T	C	0.076	0.140736	0.0509042	1.28217	0.00694484
13	13:23619200	23619200	T	C	0.499	0.0734268	0.0265993	1.01852	0.00695847
13	13:23629419	23629419	T	C	0.499	0.0734268	0.0265993	1.01852	0.00695847
4	4:51888647	51888647	G	A	0.405	-0.0793326	0.0289681	1.07197	0.00695933
4	4:51892670	51892670	T	C	0.405	-0.0793326	0.0289681	1.07197	0.00695933
4	4:51893129	51893129	C	T	0.405	-0.0793326	0.0289681	1.07197	0.00695933
36	36:22423201	22423201	G	C	0.489	0.0714194	0.0257808	1.00205	0.0069604
9	9:47651779	47651779	T	C	0.049	0.169646	0.0621646	1.16575	0.0069663
17	17:41239458	41239458	C	T	0.274	-0.0860232	0.0304292	0.930993	0.00696706
22	22:11012981	11012981	C	T	0.368	0.0825417	0.0289776	0.905574	0.00697113
33	33:14070586	14070586	T	G	0.171	0.0959194	0.0348817	1.03774	0.00697379
4	4:35382491	35382491	C	T	0.376	0.0822871	0.0301611	1.16601	0.00697621
4	4:35405436	35405436	G	T	0.376	0.0822871	0.0301611	1.16601	0.00697621
22	22:8866167	8866167	C	T	0.342	0.0832322	0.0296499	0.950545	0.00697676
7	7:63046643	63046643	C	G	0.063	0.152912	0.0555433	1.02975	0.00697705
19	19:9141746	9141746	T	C	0.144	-0.106184	0.038504	1.02249	0.00697734
16	16:46295135	46295135	G	C	0.121	-0.110215	0.0403697	1.09947	0.00698992
16	16:46329630	46329630	A	C	0.121	-0.110215	0.0403697	1.09947	0.00698992
37	37:24764933	24764933	G	C	0.473	-0.0722336	0.026087	1.0002	0.00699001
20	20:49794210	49794210	G	A	0.241	-0.0904331	0.0330203	1.06234	0.00700023
26	26:11465395	11465395	C	T	0.437	0.0756993	0.0277691	1.14105	0.00700086
26	26:11475711	11475711	A	G	0.437	0.0756993	0.0277691	1.14105	0.00700086
36	36:23429254	23429254	T	G	0.325	0.0826071	0.0295996	0.967037	0.0070061
10	10:27335188	27335188	A	C	0.161	-0.104424	0.0379172	1.02615	0.0070071
16	16:46272740	46272740	C	T	0.122	-0.10874	0.0398276	1.09162	0.00701773
8	8:59136141	59136141	T	C	0.308	0.0847784	0.0304735	0.979453	0.00702227
19	19:35552452	35552452	A	C	0.403	0.0746997	0.027128	1.02567	0.00702437
19	19:35553335	35553335	A	G	0.403	0.0746997	0.027128	1.02567	0.00702437
19	19:35564850	35564850	T	C	0.403	0.0746997	0.027128	1.02567	0.00702437
19	19:35566874	35566874	C	G	0.403	0.0746997	0.027128	1.02567	0.00702437
19	19:35578745	35578745	A	C	0.403	0.0746997	0.027128	1.02567	0.00702437
33	33:26010086	26010086	C	T	0.048	0.16667	0.0611272	1.10705	0.00702669
20	20:4780225	4780225	T	C	0.042	0.174133	0.0638244	1.09161	0.00705118
20	20:5556745	5556745	A	G	0.042	0.174133	0.0638244	1.09161	0.00705118
20	20:5566233	5566233	C	T	0.042	0.174133	0.0638244	1.09161	0.00705118
20	20:5570978	5570978	G	A	0.042	0.174133	0.0638244	1.09161	0.00705118
20	20:5583272	5583272	A	G	0.042	0.174133	0.0638244	1.09161	0.00705118
2	2:44173877	44173877	C	T	0.342	-0.0833661	0.0304353	1.05629	0.0070531
7	7:63930206	63930206	T	A	0.462	0.0755666	0.0276974	1.09498	0.00705348
7	7:63951035	63951035	T	C	0.462	0.0755666	0.0276974	1.09498	0.00705348
7	7:63969705	63969705	T	A	0.462	0.0755666	0.0276974	1.09498	0.00705348
30	30:9080398	9080398	C	T	0.387	0.0756268	0.0277623	1.12448	0.00705367
30	30:9086631	9086631	G	A	0.387	0.0756268	0.0277623	1.12448	0.00705367
37	37:2274786	2274786	T	C	0.374	0.074603	0.0271862	1.04459	0.0070537
22	22:61135569	61135569	T	C	0.14	-0.102077	0.0374339	1.09977	0.00705432
22	22:61140475	61140475	A	G	0.14	-0.102077	0.0374339	1.09977	0.00705432
29	29:37261238	37261238	A	G	0.167	0.0977091	0.0357095	1.22359	0.00705735
29	29:37261863	37261863	A	C	0.167	0.0977091	0.0357095	1.22359	0.00705735
36	36:27360408	27360408	T	A	0.166	-0.095389	0.0348875	1.06604	0.00706905
7	7:64552432	64552432	G	A	0.479	0.0762353	0.0279948	1.12648	0.0070719
37	37:23086840	23086840	A	G	0.139	0.105604	0.038805	1.13543	0.00709524
11	11:23640790	23640790	A	C	0.333	0.0762658	0.0276581	1.01105	0.00709657
11	11:23642704	23642704	C	G	0.333	0.0762658	0.0276581	1.01105	0.00709657
11	11:23652834	23652834	T	C	0.333	0.0762658	0.0276581	1.01105	0.00709657
4	4:31811946	31811946	C	T	0.164	0.104384	0.0374863	0.970229	0.00710883
1	1:94901941	94901941	A	G	0.447	0.0765626	0.0280089	1.06381	0.00711142
17	17:43498765	43498765	T	C	0.239	-0.0919422	0.0328034	0.949303	0.00711446
12	12:70728343	70728343	T	C	0.205	-0.0894413	0.0325168	1.02104	0.00711551
37	37:21078779	21078779	A	G	0.417	-0.0755301	0.027759	1.11528	0.00713147
37	37:21081006	21081006	G	A	0.417	-0.0755301	0.027759	1.11528	0.00713147
19	19:8606413	8606413	G	A	0.146	-0.104826	0.0379757	1.0045	0.00713866
19	19:8617078	8617078	C	A	0.146	-0.104826	0.0379757	1.0045	0.00713866
19	19:36746441	36746441	A	C	0.301	0.0788972	0.0289263	1.07843	0.00714497
22	22:55775371	55775371	T	C	0.452	-0.0737037	0.0270284	1.07995	0.00714528
22	22:55765082	55765082	T	C	0.454	-0.0735011	0.0269471	1.07522	0.00715689
22	22:55767110	55767110	T	C	0.454	-0.0735011	0.0269471	1.07522	0.00715689
20	20:51382029	51382029	G	A	0.241	-0.0873952	0.0321452	1.15797	0.00716141
17	17:40503063	40503063	T	C	0.463	0.0739503	0.027059	1.05678	0.00717016
37	37:312344	312344	C	T	0.422	0.0710732	0.025938	1.03999	0.00717224
14	14:33083091	33083091	T	C	0.336	0.0773193	0.0284046	1.19057	0.00717832
20	20:49902770	49902770	C	T	0.24	-0.0900982	0.0330306	1.06906	0.00718387
13	13:22965849	22965849	G	A	0.382	0.0766969	0.0277104	0.989035	0.00720196
10	10:27475330	27475330	T	C	0.161	-0.104032	0.0378768	1.02154	0.00721008
1	1:40642134	40642134	C	T	0.052	-0.15661	0.0568765	1.28526	0.00721121
17	17:63479351	63479351	G	T	0.103	-0.118095	0.0434418	1.1006	0.00722341
4	4:37233756	37233756	G	T	0.326	0.0793341	0.0292162	1.15675	0.00722752
27	27:14129821	14129821	G	A	0.382	-0.0775792	0.0278606	1.34214	0.00722911
11	11:44950265	44950265	A	G	0.215	0.0942006	0.0340895	0.994358	0.00723097
11	11:44950649	44950649	T	G	0.215	0.0942006	0.0340895	0.994358	0.00723097
11	11:44974600	44974600	G	A	0.215	0.0942006	0.0340895	0.994358	0.00723097
21	21:50187157	50187157	G	A	0.249	-0.0836387	0.0307949	1.16528	0.00723267
20	20:52526021	52526021	A	G	0.283	-0.0827772	0.0303674	1.06815	0.00723374
20	20:52533751	52533751	C	T	0.283	-0.0827772	0.0303674	1.06815	0.00723374
20	20:52578222	52578222	T	G	0.283	-0.0827772	0.0303674	1.06815	0.00723374
13	13:23565235	23565235	G	A	0.5	0.0732527	0.0267016	1.02477	0.00724476
13	13:23572285	23572285	T	C	0.5	0.0732527	0.0267016	1.02477	0.00724476
13	13:23595906	23595906	G	T	0.5	0.0732527	0.0267016	1.02477	0.00724476
13	13:23613958	23613958	G	A	0.5	0.0732527	0.0267016	1.02477	0.00724476
13	13:23623601	23623601	T	G	0.5	0.0732527	0.0267016	1.02477	0.00724476
12	12:71641246	71641246	A	G	0.218	-0.0868707	0.0320113	1.13386	0.00725427
12	12:71643609	71643609	C	T	0.218	-0.0868707	0.0320113	1.13386	0.00725427
12	12:71644784	71644784	C	A	0.218	-0.0868707	0.0320113	1.13386	0.00725427
8	8:54139158	54139158	G	A	0.132	-0.105882	0.0378154	0.943205	0.00727139
5	5:19128024	19128024	G	C	0.213	0.0881241	0.0323012	1.05567	0.00727152
19	19:34561747	34561747	C	T	0.184	0.0926052	0.0340203	1.07516	0.0072776
12	12:37225104	37225104	T	C	0.068	0.132249	0.048456	1.05139	0.0072798
[truncated: 8,001 more rows]

## Sheet: Table S1c
Supplementary Table S1c. The 10,000 most significant markers sorted by P value obtained from the genome-wide association study in a subset of younger cases (7 years or less, n=77) and older controls (10 years or more, n=184).
Chromosome	SNP ID	Position	Minor allele	Major allele	Allele frequency	Beta estimates	Standard errors for beta	Restricted maximum likelihood estimates for lambda	P value of score test
11	11:41548536	41548536	T	C	0.397	-0.195752	0.0412013	2.87309	1.17105e-05
11	11:41532663	41532663	T	C	0.354	-0.198786	0.0428365	3.54127	1.24556e-05
11	11:41561713	41561713	T	C	0.354	-0.198786	0.0428365	3.54127	1.24556e-05
11	11:41562929	41562929	C	A	0.354	-0.198786	0.0428365	3.54127	1.24556e-05
11	11:41252822	41252822	T	C	0.352	-0.199147	0.043109	3.52643	1.35772e-05
11	11:41256177	41256177	T	C	0.352	-0.199147	0.043109	3.52643	1.35772e-05
11	11:41547206	41547206	A	G	0.352	-0.199147	0.043109	3.52643	1.35772e-05
11	11:43187883	43187883	A	G	0.406	0.193002	0.0399143	2.35582	1.5849e-05
11	11:40758853	40758853	A	G	0.352	-0.201628	0.0441764	3.40344	1.75641e-05
11	11:40776377	40776377	C	T	0.352	-0.201628	0.0441764	3.40344	1.75641e-05
11	11:42213042	42213042	C	T	0.397	0.190504	0.0402115	2.53437	1.78213e-05
11	11:42238647	42238647	C	T	0.397	0.190504	0.0402115	2.53437	1.78213e-05
11	11:42261240	42261240	C	A	0.397	0.190504	0.0402115	2.53437	1.78213e-05
11	11:39994316	39994316	T	C	0.372	-0.198037	0.0428014	2.88841	1.88239e-05
11	11:39925315	39925315	A	T	0.352	-0.201678	0.0443968	3.40198	1.90957e-05
11	11:39926574	39926574	A	G	0.352	-0.201678	0.0443968	3.40198	1.90957e-05
11	11:40777312	40777312	C	T	0.41	-0.197686	0.0425522	2.7297	2.04068e-05
11	11:40782127	40782127	A	G	0.41	-0.197686	0.0425522	2.7297	2.04068e-05
11	11:40784980	40784980	A	G	0.41	-0.197686	0.0425522	2.7297	2.04068e-05
11	11:40352759	40352759	C	T	0.397	-0.194682	0.0425953	3.02482	2.11349e-05
11	11:40367664	40367664	C	T	0.397	-0.194682	0.0425953	3.02482	2.11349e-05
11	11:40370670	40370670	C	T	0.397	-0.194682	0.0425953	3.02482	2.11349e-05
11	11:42101398	42101398	G	A	0.414	-0.182471	0.0405302	3.36177	2.26518e-05
11	11:41589812	41589812	G	A	0.443	-0.187217	0.0402542	2.60272	2.29395e-05
11	11:43598990	43598990	A	G	0.385	0.18872	0.0406145	2.60016	2.37194e-05
11	11:40134930	40134930	G	T	0.46	-0.190503	0.0420956	3.09634	2.39825e-05
11	11:40987365	40987365	A	G	0.356	-0.193341	0.043277	3.48015	2.47052e-05
11	11:41525068	41525068	C	A	0.441	-0.18636	0.0403717	2.59249	2.66496e-05
11	11:42179479	42179479	C	A	0.402	-0.182505	0.0407151	3.17859	2.68324e-05
11	11:42182650	42182650	A	G	0.402	-0.182505	0.0407151	3.17859	2.68324e-05
11	11:42198523	42198523	G	A	0.427	0.181802	0.0405902	3.17496	2.7203e-05
11	11:41624538	41624538	A	G	0.456	-0.186122	0.0409124	2.74135	2.96945e-05
11	11:41648808	41648808	A	T	0.456	-0.186122	0.0409124	2.74135	2.96945e-05
11	11:42088118	42088118	T	A	0.4	-0.181617	0.0408346	3.15684	3.10609e-05
11	11:41601470	41601470	T	C	0.429	-0.186546	0.0404666	2.44823	3.32615e-05
11	11:41209597	41209597	G	A	0.444	-0.187293	0.0411589	2.62626	3.38899e-05
11	11:41628471	41628471	G	A	0.444	-0.187293	0.0411589	2.62626	3.38899e-05
11	11:40963324	40963324	A	G	0.473	-0.183748	0.0407329	2.73539	3.41741e-05
11	11:40964679	40964679	T	C	0.473	-0.183748	0.0407329	2.73539	3.41741e-05
11	11:41003808	41003808	A	G	0.473	-0.183748	0.0407329	2.73539	3.41741e-05
11	11:40005289	40005289	A	G	0.427	-0.18315	0.041158	2.94961	3.5218e-05
11	11:41230601	41230601	A	G	0.435	-0.178992	0.0410044	3.49476	3.61889e-05
11	11:40808098	40808098	G	A	0.448	-0.183031	0.0403865	2.57859	3.74158e-05
11	11:40823710	40823710	C	T	0.448	-0.183031	0.0403865	2.57859	3.74158e-05
11	11:40825748	40825748	G	T	0.448	-0.183031	0.0403865	2.57859	3.74158e-05
11	11:43064938	43064938	T	C	0.389	0.184512	0.0408104	2.61385	3.80134e-05
11	11:41606527	41606527	G	T	0.443	-0.186309	0.041273	2.61606	3.95829e-05
11	11:39924801	39924801	C	T	0.354	-0.193933	0.0445103	3.33994	3.97383e-05
11	11:40946096	40946096	T	C	0.471	-0.182514	0.0408163	2.72169	4.04068e-05
11	11:41525037	41525037	T	C	0.398	-0.18021	0.0411743	3.1353	4.11774e-05
11	11:42094447	42094447	C	A	0.473	-0.177884	0.0407429	3.09233	4.43261e-05
11	11:39963631	39963631	A	G	0.408	-0.181566	0.0421093	3.40957	4.55073e-05
11	11:43721145	43721145	G	A	0.398	0.182248	0.0402526	2.4556	4.60623e-05
11	11:41660654	41660654	G	A	0.502	-0.182843	0.0403318	2.43099	4.66911e-05
11	11:41673196	41673196	T	C	0.502	-0.182843	0.0403318	2.43099	4.66911e-05
11	11:41776731	41776731	A	T	0.502	-0.182843	0.0403318	2.43099	4.66911e-05
11	11:41850796	41850796	T	C	0.502	-0.182843	0.0403318	2.43099	4.66911e-05
11	11:43172809	43172809	G	A	0.398	0.182615	0.0404891	2.48281	4.72135e-05
11	11:42952952	42952952	T	C	0.389	0.180802	0.040717	2.64425	4.96981e-05
11	11:40097822	40097822	A	G	0.458	-0.183797	0.0421037	2.92619	5.06098e-05
11	11:40272585	40272585	T	C	0.456	-0.183376	0.0421998	2.90032	5.59132e-05
11	11:40391750	40391750	A	C	0.456	-0.183376	0.0421998	2.90032	5.59132e-05
11	11:40401612	40401612	A	T	0.456	-0.183376	0.0421998	2.90032	5.59132e-05
11	11:40402300	40402300	G	T	0.456	-0.183376	0.0421998	2.90032	5.59132e-05
11	11:41475242	41475242	T	G	0.498	0.17043	0.0381875	2.45774	5.64855e-05
11	11:40851998	40851998	G	A	0.414	-0.17568	0.0412093	3.27755	5.80332e-05
11	11:40864349	40864349	G	T	0.414	-0.17568	0.0412093	3.27755	5.80332e-05
11	11:40871956	40871956	C	T	0.414	-0.17568	0.0412093	3.27755	5.80332e-05
11	11:40873067	40873067	T	C	0.414	-0.17568	0.0412093	3.27755	5.80332e-05
11	11:40876927	40876927	G	A	0.414	-0.17568	0.0412093	3.27755	5.80332e-05
11	11:40880071	40880071	A	G	0.414	-0.17568	0.0412093	3.27755	5.80332e-05
11	11:40883794	40883794	T	C	0.414	-0.17568	0.0412093	3.27755	5.80332e-05
11	11:40910664	40910664	A	C	0.414	-0.17568	0.0412093	3.27755	5.80332e-05
11	11:43501947	43501947	G	A	0.45	0.169872	0.0390991	2.83451	5.81846e-05
11	11:40919691	40919691	T	C	0.467	0.182146	0.041141	2.5478	5.98748e-05
11	11:40920608	40920608	G	T	0.467	0.182146	0.041141	2.5478	5.98748e-05
11	11:40924188	40924188	G	C	0.467	0.182146	0.041141	2.5478	5.98748e-05
11	11:40940614	40940614	G	A	0.467	0.182146	0.041141	2.5478	5.98748e-05
11	11:40953268	40953268	C	T	0.467	0.182146	0.041141	2.5478	5.98748e-05
11	11:41011254	41011254	T	C	0.467	0.182146	0.041141	2.5478	5.98748e-05
11	11:41057665	41057665	C	G	0.467	0.182146	0.041141	2.5478	5.98748e-05
11	11:41069717	41069717	T	C	0.467	0.182146	0.041141	2.5478	5.98748e-05
37	37:24037417	24037417	A	G	0.255	0.182517	0.0433877	4.71222	6.13767e-05
37	37:24039213	24039213	T	C	0.255	0.182517	0.0433877	4.71222	6.13767e-05
37	37:24042060	24042060	A	G	0.255	0.182517	0.0433877	4.71222	6.13767e-05
11	11:41611530	41611530	T	C	0.49	-0.181585	0.04028	2.32336	6.16589e-05
11	11:39996002	39996002	T	C	0.513	-0.178075	0.0412998	2.91566	6.19659e-05
11	11:40112529	40112529	C	A	0.513	-0.178075	0.0412998	2.91566	6.19659e-05
11	11:41137201	41137201	C	T	0.515	-0.183447	0.041113	2.42143	6.33775e-05
11	11:41144469	41144469	A	G	0.515	-0.183447	0.041113	2.42143	6.33775e-05
11	11:42669763	42669763	A	G	0.414	-0.168693	0.0399465	3.38919	6.38606e-05
11	11:42676131	42676131	G	A	0.414	-0.168693	0.0399465	3.38919	6.38606e-05
11	11:42676919	42676919	A	C	0.414	-0.168693	0.0399465	3.38919	6.38606e-05
11	11:43479473	43479473	G	A	0.46	0.168594	0.0388656	2.68331	6.96513e-05
11	11:40447455	40447455	C	T	0.511	-0.176438	0.0412542	2.88432	7.26962e-05
11	11:41134483	41134483	G	A	0.521	-0.182462	0.0412554	2.41945	7.37037e-05
11	11:42641025	42641025	T	C	0.402	-0.168811	0.040164	3.22668	7.44633e-05
11	11:39902892	39902892	C	T	0.431	-0.173711	0.0408788	2.90019	7.81465e-05
39	39:88041939	88041939	T	C	0.515	0.132037	0.0318106	4.95505	7.88152e-05
11	11:43483348	43483348	A	G	0.462	0.167388	0.0389407	2.68017	8.12023e-05
11	11:43553619	43553619	T	C	0.462	0.167388	0.0389407	2.68017	8.12023e-05
11	11:39787609	39787609	C	T	0.354	-0.183753	0.0440137	3.25513	8.15532e-05
11	11:39794319	39794319	G	A	0.354	-0.183753	0.0440137	3.25513	8.15532e-05
11	11:39801198	39801198	A	G	0.354	-0.183753	0.0440137	3.25513	8.15532e-05
37	37:23998044	23998044	A	G	0.299	0.17378	0.0420761	4.8447	8.32063e-05
11	11:40205082	40205082	G	A	0.487	-0.174606	0.0407677	2.70767	8.42531e-05
11	11:42641047	42641047	C	A	0.408	-0.168007	0.0403087	3.21487	8.52864e-05
39	39:88025352	88025352	C	T	0.5	0.130834	0.0317687	4.88977	8.75143e-05
11	11:41148019	41148019	A	G	0.485	-0.17342	0.0414951	3.04213	9.26068e-05
11	11:39434964	39434964	G	A	0.448	-0.174332	0.041663	2.98102	9.37991e-05
39	39:87344737	87344737	A	G	0.393	0.133271	0.0328073	4.6845	0.000103289
39	39:87359743	87359743	A	G	0.393	0.133271	0.0328073	4.6845	0.000103289
11	11:42885819	42885819	A	G	0.421	0.167141	0.0406989	3.26124	0.000104174
11	11:42888192	42888192	T	A	0.421	0.167141	0.0406989	3.26124	0.000104174
11	11:41447098	41447098	C	T	0.341	-0.181643	0.0445056	3.41225	0.000106643
11	11:39260557	39260557	T	C	0.395	-0.178191	0.0428993	2.96291	0.000106973
11	11:39299911	39299911	C	T	0.395	-0.178191	0.0428993	2.96291	0.000106973
11	11:39286625	39286625	G	A	0.406	-0.173711	0.0422088	3.12757	0.000108974
11	11:43576958	43576958	A	G	0.429	-0.161141	0.0391033	3.09695	0.000109374
39	39:87414946	87414946	C	T	0.395	0.132543	0.0329028	4.70902	0.000117185
11	11:41265486	41265486	C	T	0.33	-0.182734	0.0449023	3.26437	0.000119581
11	11:41274170	41274170	A	C	0.33	-0.182734	0.0449023	3.26437	0.000119581
11	11:41439503	41439503	A	G	0.33	-0.182734	0.0449023	3.26437	0.000119581
11	11:41506007	41506007	T	C	0.33	-0.182734	0.0449023	3.26437	0.000119581
36	36:27227904	27227904	T	C	0.192	-0.193259	0.0481932	3.95753	0.000120191
36	36:27238312	27238312	A	G	0.192	-0.193259	0.0481932	3.95753	0.000120191
11	11:43064189	43064189	A	G	0.408	-0.161658	0.0396181	3.16267	0.000121138
11	11:39979644	39979644	G	T	0.337	-0.183619	0.0450267	3.14324	0.000124714
39	39:88035109	88035109	T	C	0.37	0.135339	0.0337829	4.78665	0.00012863
11	11:41200164	41200164	G	C	0.328	-0.183187	0.0452415	3.25534	0.000129526
11	11:41298731	41298731	A	G	0.328	-0.183187	0.0452415	3.25534	0.000129526
11	11:41301682	41301682	C	G	0.328	-0.183187	0.0452415	3.25534	0.000129526
11	11:41312828	41312828	A	C	0.328	-0.183187	0.0452415	3.25534	0.000129526
11	11:41314753	41314753	C	T	0.328	-0.183187	0.0452415	3.25534	0.000129526
11	11:41334090	41334090	C	T	0.328	-0.183187	0.0452415	3.25534	0.000129526
11	11:41343691	41343691	G	A	0.328	-0.183187	0.0452415	3.25534	0.000129526
11	11:41350277	41350277	G	C	0.328	-0.183187	0.0452415	3.25534	0.000129526
11	11:41354086	41354086	T	C	0.328	-0.183187	0.0452415	3.25534	0.000129526
11	11:41375800	41375800	C	A	0.328	-0.183187	0.0452415	3.25534	0.000129526
11	11:41393054	41393054	C	T	0.328	-0.183187	0.0452415	3.25534	0.000129526
11	11:41395148	41395148	A	C	0.328	-0.183187	0.0452415	3.25534	0.000129526
11	11:41430463	41430463	T	C	0.328	-0.183187	0.0452415	3.25534	0.000129526
11	11:41501631	41501631	A	G	0.328	-0.183187	0.0452415	3.25534	0.000129526
11	11:41522419	41522419	C	A	0.328	-0.183187	0.0452415	3.25534	0.000129526
11	11:43269715	43269715	T	A	0.487	0.158843	0.0393536	3.25356	0.000135655
39	39:87518581	87518581	T	C	0.377	0.133833	0.0335857	4.89425	0.00014179
4	4:38119794	38119794	C	T	0.18	0.216629	0.0544073	3.59887	0.000142282
4	4:38120407	38120407	G	C	0.18	0.216629	0.0544073	3.59887	0.000142282
4	4:38122939	38122939	C	T	0.18	0.216629	0.0544073	3.59887	0.000142282
4	4:38124117	38124117	G	A	0.18	0.216629	0.0544073	3.59887	0.000142282
4	4:38126871	38126871	A	T	0.18	0.216629	0.0544073	3.59887	0.000142282
4	4:38130974	38130974	G	A	0.18	0.216629	0.0544073	3.59887	0.000142282
12	12:70364935	70364935	T	G	0.102	-0.262495	0.065584	5.16852	0.000142637
26	26:10836847	10836847	G	A	0.471	-0.163558	0.0411445	3.64806	0.000143964
11	11:41570647	41570647	T	C	0.358	-0.182122	0.0435149	2.55895	0.000145915
39	39:87546053	87546053	T	C	0.393	0.132035	0.0332635	4.83078	0.000147948
11	11:41257293	41257293	C	T	0.326	-0.182813	0.0456347	3.26337	0.000150603
39	39:87773150	87773150	A	G	0.372	0.133844	0.0338539	4.83221	0.000156524
11	11:43272660	43272660	C	T	0.489	0.157486	0.0394109	3.23359	0.000158671
39	39:87856303	87856303	G	T	0.508	0.126745	0.0321783	4.73605	0.000162041
39	39:87431735	87431735	C	T	0.375	0.131584	0.0333643	4.94649	0.000166021
11	11:43569687	43569687	A	G	0.343	-0.166255	0.0419657	3.29032	0.000174733
11	11:39569914	39569914	C	T	0.456	-0.166365	0.0416063	3.05078	0.000175096
11	11:39607431	39607431	T	G	0.456	-0.166365	0.0416063	3.05078	0.000175096
11	11:39732327	39732327	C	T	0.456	-0.166365	0.0416063	3.05078	0.000175096
11	11:39855024	39855024	A	G	0.456	-0.166365	0.0416063	3.05078	0.000175096
22	22:60626252	60626252	C	T	0.27	0.167683	0.041623	2.81453	0.000183923
22	22:60635641	60635641	C	T	0.27	0.167683	0.041623	2.81453	0.000183923
22	22:60674078	60674078	G	A	0.27	0.167683	0.041623	2.81453	0.000183923
39	39:87387767	87387767	T	C	0.45	-0.125464	0.0323608	4.25803	0.000191378
39	39:87395444	87395444	G	A	0.45	-0.125464	0.0323608	4.25803	0.000191378
12	12:70281179	70281179	C	T	0.092	-0.265306	0.0684287	4.37274	0.00019251
12	12:70281430	70281430	G	A	0.092	-0.265306	0.0684287	4.37274	0.00019251
11	11:39868191	39868191	C	T	0.481	0.165688	0.0414022	2.89768	0.000197139
11	11:39876280	39876280	G	C	0.481	0.165688	0.0414022	2.89768	0.000197139
11	11:39884429	39884429	A	G	0.481	0.165688	0.0414022	2.89768	0.000197139
39	39:87333233	87333233	C	T	0.412	0.125592	0.032492	4.36976	0.00020061
21	21:4878523	4878523	A	G	0.289	-0.167402	0.0433709	4.42082	0.000205335
11	11:42977249	42977249	T	C	0.443	0.159781	0.0404937	3.0994	0.000205476
11	11:40787722	40787722	T	G	0.335	-0.177472	0.0450151	3.08746	0.000210924
39	39:86833581	86833581	C	T	0.412	0.126909	0.033022	4.17037	0.000215144
39	39:86862023	86862023	C	T	0.412	0.126909	0.033022	4.17037	0.000215144
11	11:39655214	39655214	T	C	0.37	-0.16979	0.0422884	2.74471	0.00021596
11	11:40074310	40074310	A	G	0.354	-0.175453	0.0435327	2.68578	0.000220848
4	4:37748075	37748075	T	C	0.234	0.184831	0.0482444	3.74574	0.000233639
39	39:88018327	88018327	C	A	0.494	0.123661	0.0322599	4.73028	0.000234698
11	11:41090440	41090440	T	C	0.333	-0.174642	0.0450375	3.23198	0.0002418
11	11:41093697	41093697	G	A	0.333	-0.174642	0.0450375	3.23198	0.0002418
11	11:41095704	41095704	T	C	0.333	-0.174642	0.0450375	3.23198	0.0002418
11	11:41112792	41112792	C	T	0.333	-0.174642	0.0450375	3.23198	0.0002418
11	11:41113722	41113722	A	C	0.333	-0.174642	0.0450375	3.23198	0.0002418
11	11:39807121	39807121	G	T	0.49	-0.162096	0.0405381	2.68278	0.000246941
11	11:39729050	39729050	G	A	0.437	-0.162325	0.0422822	3.45095	0.000248462
11	11:39851658	39851658	A	T	0.437	-0.162325	0.0422822	3.45095	0.000248462
11	11:39854465	39854465	C	A	0.437	-0.162325	0.0422822	3.45095	0.000248462
22	22:60638490	60638490	C	A	0.27	0.16341	0.0413734	2.78702	0.000251248
39	39:87969110	87969110	C	A	0.375	0.128881	0.0338599	4.74248	0.000258492
11	11:41583157	41583157	C	T	0.385	-0.16742	0.0431322	3.09959	0.00025866
11	11:41586896	41586896	C	A	0.385	-0.16742	0.0431322	3.09959	0.00025866
21	21:2438393	2438393	A	G	0.285	-0.166557	0.0439346	4.41042	0.000260719
26	26:11952554	11952554	T	C	0.444	0.161407	0.0423986	3.60945	0.000264087
21	21:4972226	4972226	C	T	0.287	-0.16396	0.0434098	4.40887	0.000273631
21	21:4997956	4997956	C	T	0.287	-0.16396	0.0434098	4.40887	0.000273631
21	21:5018349	5018349	T	C	0.287	-0.16396	0.0434098	4.40887	0.000273631
21	21:5108428	5108428	G	A	0.287	-0.16396	0.0434098	4.40887	0.000273631
11	11:39305139	39305139	A	G	0.454	-0.16571	0.0422718	2.84159	0.000281728
22	22:60760134	60760134	T	C	0.287	0.16097	0.0410578	2.77887	0.000286179
22	22:60772063	60772063	G	A	0.287	0.16097	0.0410578	2.77887	0.000286179
22	22:60774760	60774760	G	A	0.287	0.16097	0.0410578	2.77887	0.000286179
22	22:60781069	60781069	A	G	0.287	0.16097	0.0410578	2.77887	0.000286179
11	11:39506978	39506978	G	A	0.517	-0.162423	0.0416284	2.85892	0.000292722
11	11:39511761	39511761	C	T	0.517	-0.162423	0.0416284	2.85892	0.000292722
11	11:39514019	39514019	T	G	0.517	-0.162423	0.0416284	2.85892	0.000292722
11	11:39515290	39515290	T	C	0.517	-0.162423	0.0416284	2.85892	0.000292722
11	11:40845978	40845978	G	A	0.423	-0.169087	0.0421435	2.45815	0.000313953
11	11:41015539	41015539	G	A	0.448	-0.167105	0.0422835	2.61437	0.000317861
4	4:37859248	37859248	A	T	0.234	0.182827	0.0487703	3.60421	0.000321557
11	11:40190451	40190451	A	G	0.393	-0.164526	0.0432014	3.12893	0.000327549
37	37:24116874	24116874	G	A	0.284	0.160389	0.0429297	4.80682	0.000334002
37	37:24121019	24121019	G	C	0.284	0.160389	0.0429297	4.80682	0.000334002
11	11:42068183	42068183	G	T	0.398	-0.166343	0.0438916	3.18063	0.000341073
11	11:42072034	42072034	C	A	0.398	-0.166343	0.0438916	3.18063	0.000341073
11	11:42074421	42074421	A	T	0.398	-0.166343	0.0438916	3.18063	0.000341073
11	11:43661361	43661361	G	A	0.444	-0.148043	0.0394099	3.31575	0.000352125
26	26:10811043	10811043	C	T	0.471	-0.154134	0.0413727	3.57147	0.00035289
21	21:5138424	5138424	A	T	0.293	-0.161094	0.0434841	4.52166	0.000355026
21	21:5338125	5338125	G	A	0.293	-0.161094	0.0434841	4.52166	0.000355026
21	21:5379306	5379306	A	T	0.293	-0.161094	0.0434841	4.52166	0.000355026
21	21:5111542	5111542	C	T	0.285	-0.160224	0.0433446	4.4074	0.000360839
11	11:41642756	41642756	T	C	0.429	-0.166627	0.0423425	2.57261	0.000362316
11	11:40968576	40968576	T	G	0.446	-0.165932	0.0423988	2.60773	0.000368418
11	11:40975633	40975633	C	G	0.446	-0.165932	0.0423988	2.60773	0.000368418
7	7:80498216	80498216	A	G	0.523	0.153962	0.0417794	4.16568	0.000371443
11	11:41217026	41217026	C	T	0.389	-0.1659	0.0438241	3.07337	0.000373152
39	39:87461300	87461300	A	G	0.473	-0.118886	0.0323373	4.31053	0.000383875
4	4:36984122	36984122	G	A	0.222	0.179859	0.0488816	3.91767	0.000384161
4	4:37003704	37003704	G	A	0.222	0.179859	0.0488816	3.91767	0.000384161
4	4:37057103	37057103	T	G	0.222	0.179859	0.0488816	3.91767	0.000384161
11	11:39707108	39707108	T	C	0.435	-0.15833	0.0425229	3.36195	0.000385632
37	37:24112089	24112089	A	G	0.285	0.157696	0.0427001	4.85907	0.000391229
11	11:39856542	39856542	T	C	0.498	-0.158931	0.0424775	3.20431	0.000395368
11	11:41040973	41040973	A	G	0.437	-0.166682	0.0423535	2.49246	0.000398424
22	22:60765326	60765326	C	A	0.345	0.140581	0.0376185	3.16366	0.000405689
26	26:7992938	7992938	T	G	0.416	-0.145867	0.0398619	4.49704	0.000413101
11	11:39491109	39491109	T	C	0.439	-0.163912	0.0439862	3.20552	0.000418864
11	11:39493172	39493172	G	A	0.439	-0.163912	0.0439862	3.20552	0.000418864
11	11:41744694	41744694	T	C	0.387	-0.165154	0.0440148	3.0626	0.000422743
11	11:40801214	40801214	T	C	0.389	-0.162416	0.0433763	3.08179	0.000423151
11	11:40803314	40803314	C	T	0.389	-0.162416	0.0433763	3.08179	0.000423151
22	22:60720836	60720836	G	T	0.347	0.13988	0.0376332	3.2072	0.000423428
22	22:60725790	60725790	G	A	0.347	0.13988	0.0376332	3.2072	0.000423428
36	36:27201217	27201217	G	A	0.192	-0.176767	0.048398	3.84206	0.000424009
26	26:11969579	11969579	G	A	0.473	0.153787	0.0419204	3.61288	0.000424485
22	22:60566230	60566230	T	C	0.262	0.16067	0.0423455	2.78341	0.000436631
11	11:39520134	39520134	C	G	0.513	-0.158008	0.0416747	2.84829	0.000436685
4	4:37552673	37552673	T	C	0.228	0.175744	0.0483074	3.83476	0.000446786
11	11:41659729	41659729	T	C	0.418	-0.165509	0.0423668	2.48994	0.000453749
11	11:41663977	41663977	T	C	0.418	-0.165509	0.0423668	2.48994	0.000453749
11	11:41665312	41665312	C	T	0.418	-0.165509	0.0423668	2.48994	0.000453749
11	11:41675274	41675274	T	C	0.418	-0.165509	0.0423668	2.48994	0.000453749
11	11:42487642	42487642	G	A	0.416	-0.160773	0.0416128	2.5794	0.000454322
37	37:24176348	24176348	A	C	0.293	0.157542	0.0436097	4.19175	0.000474874
11	11:41050406	41050406	T	C	0.381	-0.160007	0.0429107	2.96097	0.000490296
11	11:41060341	41060341	A	G	0.381	-0.160007	0.0429107	2.96097	0.000490296
11	11:41067470	41067470	A	T	0.381	-0.160007	0.0429107	2.96097	0.000490296
11	11:41078090	41078090	G	A	0.381	-0.160007	0.0429107	2.96097	0.000490296
11	11:41080449	41080449	G	A	0.381	-0.160007	0.0429107	2.96097	0.000490296
21	21:990876	990876	A	G	0.287	-0.158395	0.0439628	4.3322	0.000492831
22	22:60767760	60767760	C	G	0.272	0.157275	0.0420364	2.8766	0.000492978
11	11:42674118	42674118	A	G	0.406	-0.159928	0.0414054	2.49019	0.000516295
11	11:39643190	39643190	C	T	0.431	-0.15672	0.0412266	2.65243	0.000523105
26	26:8212324	8212324	A	G	0.416	-0.143239	0.0399496	4.38361	0.000524373
26	26:8231315	8231315	T	C	0.416	-0.143239	0.0399496	4.38361	0.000524373
11	11:41641512	41641512	A	C	0.475	-0.163926	0.0417023	2.31718	0.000542577
4	4:37810709	37810709	G	A	0.22	0.181557	0.0503207	3.46384	0.000544414
4	4:37812908	37812908	A	G	0.22	0.181557	0.0503207	3.46384	0.000544414
4	4:37816573	37816573	T	C	0.22	0.181557	0.0503207	3.46384	0.000544414
11	11:39526452	39526452	T	G	0.412	-0.158012	0.04281	2.98303	0.000552268
11	11:39529296	39529296	T	C	0.412	-0.158012	0.04281	2.98303	0.000552268
19	19:52611618	52611618	C	T	0.128	-0.219209	0.0609926	4.9221	0.000555112
11	11:39320039	39320039	C	T	0.423	-0.155959	0.0411638	2.62778	0.000564701
4	4:37777274	37777274	C	G	0.216	0.179778	0.0501591	3.53633	0.000575126
11	11:42391383	42391383	A	G	0.383	-0.151783	0.0421153	3.34314	0.000584733
11	11:42434938	42434938	T	C	0.385	-0.152592	0.0420871	3.20013	0.000587695
11	11:42439975	42439975	T	C	0.385	-0.152592	0.0420871	3.20013	0.000587695
11	11:42361995	42361995	A	G	0.372	-0.153972	0.0425814	3.20075	0.000607573
21	21:3247548	3247548	A	G	0.197	-0.172862	0.0488813	4.18876	0.000612601
21	21:3287984	3287984	G	C	0.197	-0.172862	0.0488813	4.18876	0.000612601
21	21:3292952	3292952	C	T	0.197	-0.172862	0.0488813	4.18876	0.000612601
21	21:3297231	3297231	C	T	0.197	-0.172862	0.0488813	4.18876	0.000612601
21	21:3313779	3313779	C	A	0.197	-0.172862	0.0488813	4.18876	0.000612601
21	21:3324525	3324525	A	G	0.197	-0.172862	0.0488813	4.18876	0.000612601
21	21:3349715	3349715	C	A	0.197	-0.172862	0.0488813	4.18876	0.000612601
21	21:3395806	3395806	C	G	0.197	-0.172862	0.0488813	4.18876	0.000612601
21	21:3415438	3415438	C	T	0.197	-0.172862	0.0488813	4.18876	0.000612601
22	22:60722401	60722401	C	T	0.345	0.135301	0.037759	3.26116	0.000648105
11	11:42374433	42374433	T	C	0.389	-0.151009	0.0423193	3.33426	0.000662114
36	36:27234474	27234474	C	A	0.211	-0.166552	0.0473319	3.69738	0.000680844
11	11:42380380	42380380	T	C	0.458	0.148795	0.0416691	3.25403	0.000684134
20	20:49476448	49476448	C	T	0.301	-0.162791	0.0464294	3.89903	0.00068685
11	11:42429463	42429463	A	G	0.416	0.155909	0.0415136	2.55864	0.000687067
21	21:6055754	6055754	T	G	0.287	-0.15557	0.044411	4.33209	0.000687784
21	21:6075754	6075754	G	A	0.287	-0.15557	0.044411	4.33209	0.000687784
22	22:60716576	60716576	T	C	0.37	0.134959	0.0376755	3.15791	0.000688377
22	22:60559265	60559265	C	T	0.23	0.162147	0.0445142	2.83187	0.000702513
22	22:60585619	60585619	T	C	0.23	0.162147	0.0445142	2.83187	0.000702513
22	22:60598730	60598730	A	G	0.23	0.162147	0.0445142	2.83187	0.000702513
11	11:42435634	42435634	G	A	0.421	0.155567	0.0414818	2.54955	0.000705456
11	11:42444688	42444688	G	T	0.421	0.155567	0.0414818	2.54955	0.000705456
11	11:42480533	42480533	A	G	0.421	0.155567	0.0414818	2.54955	0.000705456
37	37:24606791	24606791	T	C	0.274	0.154408	0.0440951	4.60632	0.000710965
26	26:8066615	8066615	A	G	0.441	-0.134821	0.0385111	4.5948	0.000711298
11	11:42389352	42389352	T	C	0.372	-0.150495	0.0422173	3.22056	0.000713116
12	12:70426096	70426096	T	C	0.088	-0.241666	0.0693302	4.08777	0.000725541
21	21:450257	450257	A	C	0.259	-0.154885	0.0443538	4.52658	0.000726055
4	4:37746459	37746459	C	T	0.239	0.167419	0.0478989	3.77766	0.000727054
11	11:40298068	40298068	A	G	0.42	-0.157866	0.0438961	3.04441	0.000733142
11	11:40377864	40377864	T	C	0.42	-0.157866	0.0438961	3.04441	0.000733142
11	11:40388646	40388646	C	T	0.42	-0.157866	0.0438961	3.04441	0.000733142
11	11:43699859	43699859	C	T	0.362	-0.145978	0.041425	3.44098	0.000736214
37	37:24608964	24608964	G	T	0.276	0.154661	0.0442644	4.72522	0.000743485
4	4:37754737	37754737	G	T	0.218	0.173485	0.0495475	3.58398	0.000746833
20	20:49451562	49451562	C	T	0.299	-0.161216	0.0463887	3.9506	0.000756639
12	12:70314512	70314512	G	A	0.113	-0.218048	0.0625513	4.67098	0.000756913
11	11:40971401	40971401	T	G	0.506	-0.15953	0.0422732	2.44768	0.000768641
11	11:40982872	40982872	A	G	0.506	-0.15953	0.0422732	2.44768	0.000768641
1	1:93892100	93892100	C	T	0.387	0.152697	0.0436035	3.39392	0.000796179
26	26:11946161	11946161	A	G	0.395	0.155216	0.0443533	3.42245	0.000804192
26	26:11971665	11971665	G	A	0.395	0.155216	0.0443533	3.42245	0.000804192
11	11:43161081	43161081	A	G	0.427	0.154281	0.0411163	2.44875	0.00082089
22	22:60644782	60644782	C	T	0.301	0.142122	0.0400047	3.02588	0.000823113
22	22:60660328	60660328	T	C	0.301	0.142122	0.0400047	3.02588	0.000823113
22	22:60666989	60666989	G	A	0.301	0.142122	0.0400047	3.02588	0.000823113
22	22:60755128	60755128	T	G	0.251	0.153666	0.0427388	2.84834	0.00082469
23	23:35388150	35388150	A	T	0.312	0.146705	0.0424295	3.74359	0.000827701
12	12:70308409	70308409	T	C	0.111	-0.216697	0.0626362	4.70862	0.000830831
30	30:16552031	16552031	A	C	0.36	0.151567	0.0438599	3.75449	0.000833793
30	30:16497320	16497320	C	T	0.36	0.152568	0.0441284	3.7026	0.000838471
37	37:24636730	24636730	G	A	0.266	0.151568	0.0440141	4.46296	0.000845056
1	1:13853992	13853992	T	C	0.073	0.270186	0.0774827	5.2028	0.000850061
1	1:13856774	13856774	T	C	0.073	0.270186	0.0774827	5.2028	0.000850061
1	1:13892732	13892732	T	G	0.073	0.270186	0.0774827	5.2028	0.000850061
1	1:13910163	13910163	A	T	0.073	0.270186	0.0774827	5.2028	0.000850061
1	1:13912662	13912662	C	T	0.073	0.270186	0.0774827	5.2028	0.000850061
1	1:13966852	13966852	G	A	0.073	0.270186	0.0774827	5.2028	0.000850061
1	1:13967960	13967960	C	A	0.073	0.270186	0.0774827	5.2028	0.000850061
1	1:13988286	13988286	T	C	0.073	0.270186	0.0774827	5.2028	0.000850061
11	11:39784897	39784897	A	G	0.337	-0.158941	0.0446808	3.00118	0.000856929
11	11:42444902	42444902	T	C	0.389	-0.147949	0.0421454	3.20537	0.000862651
22	22:60727021	60727021	T	C	0.238	0.155131	0.0435177	2.88545	0.000890834
26	26:10764629	10764629	T	G	0.429	0.147027	0.0426798	3.60253	0.000897389
11	11:41137924	41137924	T	C	0.46	-0.152274	0.0426941	2.90358	0.000908101
1	1:13409669	13409669	G	A	0.069	0.271336	0.0784211	5.12156	0.000909949
1	1:13412399	13412399	A	G	0.069	0.271336	0.0784211	5.12156	0.000909949
26	26:7719101	7719101	A	T	0.408	-0.135843	0.039771	4.19868	0.000911692
4	4:37869704	37869704	A	G	0.213	0.172954	0.0501917	3.50481	0.000920076
4	4:37957314	37957314	T	C	0.213	0.172954	0.0501917	3.50481	0.000920076
4	4:37961765	37961765	C	T	0.213	0.172954	0.0501917	3.50481	0.000920076
4	4:37966180	37966180	G	A	0.213	0.172954	0.0501917	3.50481	0.000920076
1	1:93897684	93897684	G	A	0.423	0.146277	0.0423841	3.43729	0.000925638
11	11:43156655	43156655	A	T	0.429	0.150829	0.0408811	2.51156	0.000929343
11	11:43437859	43437859	T	C	0.489	0.143797	0.0396322	2.66009	0.000932614
11	11:43455777	43455777	C	G	0.489	0.143797	0.0396322	2.66009	0.000932614
22	22:60705459	60705459	T	C	0.339	0.135122	0.0387644	3.17573	0.00094162
22	22:60706353	60706353	A	G	0.339	0.135122	0.0387644	3.17573	0.00094162
36	36:27241275	27241275	G	A	0.241	-0.156631	0.0458851	3.76874	0.000950164
14	14:30495315	30495315	A	T	0.485	0.138106	0.0402102	3.54148	0.000950333
11	11:43198757	43198757	A	G	0.391	-0.142933	0.0408322	3.1106	0.000951653
26	26:10156355	10156355	T	A	0.45	-0.139136	0.040906	4.11615	0.00095562
22	22:60720109	60720109	A	G	0.239	0.153209	0.0434297	2.93792	0.000963708
14	14:33091302	33091302	G	A	0.452	-0.132828	0.0390731	4.00142	0.000966631
14	14:33091354	33091354	A	T	0.452	-0.132828	0.0390731	4.00142	0.000966631
22	22:60725183	60725183	A	G	0.284	0.138711	0.0401628	3.30507	0.000974767
11	11:39166109	39166109	G	A	0.429	-0.146305	0.0409249	2.78718	0.00097564
22	22:60578103	60578103	C	T	0.276	0.148891	0.042183	2.89374	0.000983697
22	22:60551247	60551247	A	G	0.278	0.140144	0.0407386	3.35862	0.000986313
22	22:60461338	60461338	T	C	0.295	0.139524	0.0404323	3.29174	0.000987597
1	1:94165329	94165329	T	C	0.377	0.148441	0.0434319	3.54869	0.000994184
11	11:43462079	43462079	C	T	0.402	-0.141855	0.0404	3.00194	0.000995121
11	11:43508802	43508802	T	C	0.402	-0.141855	0.0404	3.00194	0.000995121
11	11:43518308	43518308	T	C	0.402	-0.141855	0.0404	3.00194	0.000995121
11	11:40523071	40523071	A	C	0.473	-0.150805	0.0429899	3.01238	0.00100478
26	26:11913397	11913397	C	T	0.481	0.142335	0.0417831	3.61042	0.00101659
11	11:42802865	42802865	A	T	0.381	-0.144039	0.0412424	3.05014	0.00101804
11	11:42823733	42823733	A	G	0.381	-0.144039	0.0412424	3.05014	0.00101804
11	11:42830592	42830592	T	A	0.381	-0.144039	0.0412424	3.05014	0.00101804
11	11:42834387	42834387	C	T	0.381	-0.144039	0.0412424	3.05014	0.00101804
11	11:42834505	42834505	G	A	0.381	-0.144039	0.0412424	3.05014	0.00101804
11	11:42845119	42845119	A	G	0.381	-0.144039	0.0412424	3.05014	0.00101804
11	11:42850705	42850705	T	C	0.381	-0.144039	0.0412424	3.05014	0.00101804
11	11:42853780	42853780	G	T	0.381	-0.144039	0.0412424	3.05014	0.00101804
11	11:42863441	42863441	A	G	0.381	-0.144039	0.0412424	3.05014	0.00101804
11	11:42873216	42873216	T	C	0.381	-0.144039	0.0412424	3.05014	0.00101804
11	11:42878412	42878412	C	T	0.381	-0.144039	0.0412424	3.05014	0.00101804
11	11:42879665	42879665	C	T	0.381	-0.144039	0.0412424	3.05014	0.00101804
11	11:39446034	39446034	T	C	0.36	-0.158074	0.0453851	3.10116	0.00102023
11	11:39448409	39448409	G	T	0.36	-0.158074	0.0453851	3.10116	0.00102023
11	11:39469053	39469053	C	T	0.36	-0.158074	0.0453851	3.10116	0.00102023
29	29:39109203	39109203	T	G	0.466	0.137605	0.0398045	3.17973	0.00102399
29	29:39112055	39112055	C	G	0.466	0.137605	0.0398045	3.17973	0.00102399
25	25:37347036	37347036	C	T	0.467	0.139453	0.0412867	4.25581	0.00103208
39	39:43219849	43219849	G	A	0.496	-0.109292	0.0320978	3.55124	0.00103233
20	20:49369199	49369199	A	G	0.086	-0.232926	0.0686853	4.67389	0.00103291
11	11:38423215	38423215	C	T	0.473	-0.141185	0.040945	3.23474	0.00104142
29	29:39970031	39970031	A	G	0.268	0.151289	0.0443734	3.43669	0.00105122
37	37:27015403	27015403	C	A	0.498	0.130326	0.0387563	3.93113	0.00109627
4	4:36915669	36915669	C	T	0.215	0.170906	0.0505219	3.59135	0.00110012
11	11:43275596	43275596	A	C	0.324	-0.148505	0.0429755	3.12819	0.0011014
11	11:43311824	43311824	C	T	0.324	-0.148505	0.0429755	3.12819	0.0011014
11	11:43316247	43316247	A	G	0.324	-0.148505	0.0429755	3.12819	0.0011014
11	11:43323141	43323141	C	T	0.324	-0.148505	0.0429755	3.12819	0.0011014
22	22:60455094	60455094	A	G	0.216	0.163177	0.0468406	2.94388	0.0011019
12	12:70628846	70628846	A	G	0.09	-0.232717	0.0689643	4.78675	0.00111322
36	36:27240833	27240833	A	G	0.245	-0.153893	0.0456633	3.6208	0.00113057
20	20:49369984	49369984	C	T	0.086	-0.231108	0.0688335	4.57001	0.00113322
29	29:39075186	39075186	A	G	0.467	0.135613	0.0396927	3.22981	0.00113763
11	11:25232580	25232580	A	G	0.285	-0.153364	0.0447859	3.20924	0.0011407
11	11:25234262	25234262	A	G	0.285	-0.153364	0.0447859	3.20924	0.0011407
11	11:25246965	25246965	A	G	0.285	-0.153364	0.0447859	3.20924	0.0011407
11	11:25247102	25247102	G	A	0.285	-0.153364	0.0447859	3.20924	0.0011407
26	26:10730798	10730798	C	T	0.464	0.138566	0.0411927	3.6541	0.00115061
37	37:23923509	23923509	A	G	0.354	0.136471	0.0407458	4.52658	0.0011559
4	4:36976685	36976685	A	G	0.211	0.169199	0.0503443	3.65618	0.00115978
11	11:39888383	39888383	G	A	0.42	-0.150543	0.0418753	2.5946	0.00116384
11	11:39429247	39429247	A	G	0.358	-0.155026	0.04511	3.12825	0.00116575
11	11:39432838	39432838	A	G	0.358	-0.155026	0.04511	3.12825	0.00116575
37	37:22942612	22942612	A	T	0.492	0.13581	0.0405692	3.80692	0.00116815
11	11:42712298	42712298	G	A	0.462	0.143181	0.041366	2.99641	0.00117426
11	11:42735991	42735991	C	A	0.462	0.143181	0.041366	2.99641	0.00117426
22	22:60749494	60749494	A	G	0.308	0.131501	0.0386399	3.25365	0.00117837
17	17:40662168	40662168	C	T	0.393	-0.14345	0.041777	3.08982	0.00118837
22	22:60457820	60457820	C	T	0.218	0.161455	0.0468472	2.99973	0.00119498
4	4:37277220	37277220	C	T	0.238	0.16266	0.0486936	3.81432	0.00119693
4	4:37285293	37285293	G	C	0.238	0.16266	0.0486936	3.81432	0.00119693
25	25:38832086	38832086	A	G	0.13	0.191967	0.0572425	3.58528	0.00120741
20	20:49426203	49426203	T	C	0.297	-0.155311	0.0466047	3.86993	0.00121392
20	20:49435717	49435717	C	G	0.297	-0.155311	0.0466047	3.86993	0.00121392
20	20:49462669	49462669	G	T	0.297	-0.155311	0.0466047	3.86993	0.00121392
11	11:42763692	42763692	G	C	0.429	0.148529	0.0409878	2.4804	0.0012153
11	11:43280364	43280364	T	C	0.322	-0.148219	0.0432297	3.11428	0.00121621
11	11:43290639	43290639	A	G	0.322	-0.148219	0.0432297	3.11428	0.00121621
26	26:10762593	10762593	G	C	0.427	0.142154	0.042557	3.68893	0.00123044
26	26:10762847	10762847	C	T	0.427	0.142154	0.042557	3.68893	0.00123044
7	7:2344218	2344218	C	A	0.059	0.292662	0.0879365	3.88006	0.00123052
11	11:39443951	39443951	C	T	0.36	-0.152031	0.0445341	3.14735	0.00123801
4	4:25379154	25379154	G	A	0.061	0.277387	0.0825646	5.07307	0.0012409
4	4:25395586	25395586	C	T	0.061	0.277387	0.0825646	5.07307	0.0012409
4	4:25421613	25421613	G	A	0.061	0.277387	0.0825646	5.07307	0.0012409
14	14:35493234	35493234	T	C	0.506	0.129834	0.0391008	4.28898	0.00124174
29	29:39235130	39235130	G	A	0.431	0.139143	0.0409453	3.17596	0.00124263
11	11:39893762	39893762	C	T	0.4	-0.15115	0.0435039	2.89359	0.00125205
1	1:95744776	95744776	G	A	0.391	0.146112	0.0439351	3.8396	0.00125399
1	1:95750319	95750319	C	T	0.391	0.146112	0.0439351	3.8396	0.00125399
26	26:10801722	10801722	T	C	0.435	0.143077	0.042637	3.44406	0.0012696
26	26:10825801	10825801	G	A	0.435	0.143077	0.042637	3.44406	0.0012696
22	22:60462820	60462820	G	A	0.297	0.134895	0.0400663	3.30028	0.00129446
11	11:42752848	42752848	A	G	0.406	-0.149155	0.0414797	2.49364	0.00130416
22	22:60570318	60570318	G	A	0.255	0.150152	0.0434273	2.83859	0.00130447
1	1:12942841	12942841	T	C	0.067	0.265006	0.0790496	5.15821	0.00130596
21	21:1983335	1983335	T	C	0.262	-0.15028	0.045464	3.97068	0.00131004
21	21:3582104	3582104	A	G	0.199	-0.161526	0.0489276	4.08653	0.00131776
21	21:3653033	3653033	G	A	0.199	-0.161526	0.0489276	4.08653	0.00131776
30	30:16455390	16455390	T	C	0.358	0.147074	0.0443692	3.74011	0.00132028
30	30:16462131	16462131	A	G	0.358	0.147074	0.0443692	3.74011	0.00132028
30	30:16548312	16548312	C	G	0.358	0.147074	0.0443692	3.74011	0.00132028
30	30:16586403	16586403	C	T	0.358	0.147074	0.0443692	3.74011	0.00132028
30	30:16595581	16595581	G	A	0.358	0.147074	0.0443692	3.74011	0.00132028
21	21:7267890	7267890	G	C	0.261	-0.152301	0.0460171	3.80578	0.00132127
12	12:70608166	70608166	T	C	0.266	-0.15641	0.047101	4.88247	0.001348
11	11:38956978	38956978	T	C	0.368	-0.149318	0.0444768	3.29691	0.00135785
11	11:42731007	42731007	A	C	0.464	0.141373	0.0413908	2.9906	0.00137246
37	37:27149235	27149235	G	A	0.423	-0.134544	0.0406842	3.66067	0.00137694
30	30:17888294	17888294	G	A	0.349	0.149502	0.0450543	3.52633	0.00138783
30	30:17895268	17895268	G	A	0.349	0.149502	0.0450543	3.52633	0.00138783
30	30:17907357	17907357	A	G	0.349	0.149502	0.0450543	3.52633	0.00138783
30	30:17907797	17907797	A	G	0.349	0.149502	0.0450543	3.52633	0.00138783
11	11:39362267	39362267	T	C	0.349	-0.151927	0.042977	2.59232	0.00140274
26	26:11949434	11949434	A	G	0.423	0.144056	0.043392	3.47427	0.00141189
23	23:35178865	35178865	T	C	0.295	0.145162	0.0438382	3.48541	0.00142836
22	22:60576096	60576096	C	T	0.239	0.151711	0.0442585	2.84359	0.00143705
11	11:35248546	35248546	C	T	0.301	0.147333	0.044572	3.48514	0.00146819
11	11:35302270	35302270	C	A	0.301	0.147333	0.044572	3.48514	0.00146819
29	29:39197229	39197229	T	A	0.433	0.136461	0.0408866	3.20206	0.00148882
36	36:27047264	27047264	C	A	0.228	-0.152689	0.0466567	3.7666	0.0014946
29	29:39137985	39137985	C	A	0.464	0.133526	0.0400631	3.22249	0.00149833
37	37:23924914	23924914	T	G	0.41	0.130855	0.0400562	4.5988	0.00151985
30	30:18911391	18911391	C	T	0.349	0.149562	0.0454425	3.48285	0.00153688
30	30:18921005	18921005	T	C	0.349	0.149562	0.0454425	3.48285	0.00153688
30	30:18928901	18928901	T	C	0.349	0.149562	0.0454425	3.48285	0.00153688
30	30:18929554	18929554	C	T	0.349	0.149562	0.0454425	3.48285	0.00153688
30	30:18939430	18939430	G	A	0.349	0.149562	0.0454425	3.48285	0.00153688
30	30:18943940	18943940	A	G	0.349	0.149562	0.0454425	3.48285	0.00153688
11	11:43370317	43370317	G	A	0.421	-0.134924	0.0407163	3.31803	0.00154232
11	11:43379989	43379989	G	T	0.421	-0.134924	0.0407163	3.31803	0.00154232
11	11:43403185	43403185	T	C	0.421	-0.134924	0.0407163	3.31803	0.00154232
22	22:60550330	60550330	T	C	0.303	0.132364	0.0402525	3.47329	0.00154255
11	11:39272712	39272712	A	G	0.347	-0.151546	0.0432152	2.58685	0.00155722
11	11:39293043	39293043	T	G	0.347	-0.151546	0.0432152	2.58685	0.00155722
38	38:2740174	2740174	G	A	0.387	-0.130052	0.0400518	4.08173	0.00156483
11	11:38677996	38677996	C	A	0.356	-0.139394	0.0423521	3.41255	0.00157395
26	26:10732780	10732780	C	T	0.423	0.139169	0.042661	3.6911	0.00157738
23	23:35915477	35915477	T	C	0.307	0.139686	0.0429182	3.75296	0.00158482
1	1:13739416	13739416	T	C	0.073	0.24533	0.0750377	4.88412	0.00158829
11	11:37184031	37184031	G	A	0.466	0.137903	0.042399	3.80265	0.00158832
11	11:37269034	37269034	T	C	0.466	0.137903	0.042399	3.80265	0.00158832
11	11:37492582	37492582	C	T	0.466	0.137903	0.042399	3.80265	0.00158832
11	11:37523572	37523572	C	T	0.466	0.137903	0.042399	3.80265	0.00158832
11	11:37528494	37528494	G	A	0.466	0.137903	0.042399	3.80265	0.00158832
11	11:42883749	42883749	T	A	0.375	-0.141096	0.0420685	3.05811	0.00159585
22	22:60621974	60621974	A	T	0.362	0.1263	0.0379737	3.15055	0.0016072
1	1:13712751	13712751	G	T	0.071	0.256451	0.0781504	5.11075	0.00161626
1	1:13717827	13717827	G	A	0.071	0.256451	0.0781504	5.11075	0.00161626
11	11:39627902	39627902	T	C	0.354	-0.148489	0.0426868	2.62459	0.00162979
11	11:38724569	38724569	C	T	0.452	-0.137382	0.0420888	3.55039	0.00163684
11	11:38724741	38724741	C	T	0.452	-0.137382	0.0420888	3.55039	0.00163684
39	39:70142335	70142335	T	G	0.379	0.108126	0.0333445	3.78101	0.00163952
30	30:16513103	16513103	A	G	0.36	0.144167	0.044395	3.71384	0.00164513
22	22:60682376	60682376	C	T	0.305	0.131971	0.0399113	3.20698	0.00165417
22	22:60702114	60702114	A	G	0.305	0.131971	0.0399113	3.20698	0.00165417
37	37:24641253	24641253	T	C	0.37	0.137861	0.0427003	4.16669	0.00165696
22	22:60609312	60609312	T	G	0.364	0.125696	0.0380053	3.19249	0.00166224
11	11:43192147	43192147	G	T	0.387	-0.135871	0.0409277	3.1542	0.00166627
26	26:7707003	7707003	G	A	0.41	-0.127808	0.0396145	4.17584	0.00166946
26	26:7741864	7741864	C	T	0.41	-0.127808	0.0396145	4.17584	0.00166946
26	26:7746309	7746309	C	T	0.41	-0.127808	0.0396145	4.17584	0.00166946
26	26:7754148	7754148	C	T	0.41	-0.127808	0.0396145	4.17584	0.00166946
1	1:121628093	121628093	C	G	0.473	0.12959	0.0383808	2.86988	0.00167798
30	30:18945831	18945831	C	T	0.345	0.150682	0.0461437	3.46482	0.00168049
11	11:38442584	38442584	T	C	0.356	-0.138707	0.0424216	3.41305	0.00168512
11	11:38468951	38468951	A	C	0.356	-0.138707	0.0424216	3.41305	0.00168512
25	25:37241838	37241838	T	A	0.441	0.137583	0.0426973	4.1511	0.00169063
4	4:37770624	37770624	G	A	0.226	0.16211	0.0498237	3.52561	0.00169563
4	4:37782390	37782390	T	C	0.226	0.16211	0.0498237	3.52561	0.00169563
4	4:37784182	37784182	A	G	0.226	0.16211	0.0498237	3.52561	0.00169563
4	4:37785687	37785687	G	A	0.226	0.16211	0.0498237	3.52561	0.00169563
30	30:17862385	17862385	G	A	0.354	0.144993	0.0445321	3.51722	0.00169817
30	30:17873870	17873870	C	T	0.354	0.144993	0.0445321	3.51722	0.00169817
37	37:26889962	26889962	T	C	0.475	0.123202	0.0382143	3.94408	0.00170266
29	29:40098396	40098396	A	T	0.278	0.143078	0.0439583	3.47198	0.00170785
11	11:39244915	39244915	T	C	0.356	-0.149537	0.0450225	3.11398	0.00171265
11	11:39247073	39247073	T	A	0.356	-0.149537	0.0450225	3.11398	0.00171265
11	11:39256671	39256671	A	G	0.356	-0.149537	0.0450225	3.11398	0.00171265
22	22:3766702	3766702	C	A	0.393	0.144177	0.0427054	2.83383	0.0017409
11	11:35226201	35226201	C	T	0.303	0.144637	0.0445159	3.47975	0.0017605
37	37:24719038	24719038	C	G	0.352	0.136009	0.0422676	3.77508	0.0017756
30	30:17866301	17866301	A	G	0.322	0.154762	0.0474921	3.37761	0.00178354
30	30:17889114	17889114	T	G	0.322	0.154762	0.0474921	3.37761	0.00178354
30	30:17931659	17931659	C	A	0.322	0.154762	0.0474921	3.37761	0.00178354
12	12:70670306	70670306	C	T	0.255	-0.142045	0.0440965	4.70312	0.00178522
11	11:38954904	38954904	T	C	0.337	-0.147786	0.0445939	3.07139	0.00179626
37	37:24733895	24733895	G	A	0.368	0.136293	0.0424647	3.85506	0.00179827
39	39:70264869	70264869	T	C	0.381	0.106946	0.0333441	3.82387	0.00181864
12	12:70978405	70978405	A	T	0.195	-0.155569	0.0485989	3.97408	0.00181902
11	11:39459625	39459625	A	G	0.496	-0.145883	0.0423637	2.63829	0.00182463
11	11:39473179	39473179	G	T	0.496	-0.145883	0.0423637	2.63829	0.00182463
22	22:60449653	60449653	G	A	0.201	0.158716	0.0481758	3.09788	0.00182622
22	22:60488465	60488465	T	C	0.201	0.158716	0.0481758	3.09788	0.00182622
22	22:60491246	60491246	A	G	0.201	0.158716	0.0481758	3.09788	0.00182622
22	22:60494708	60494708	T	C	0.201	0.158716	0.0481758	3.09788	0.00182622
22	22:60502010	60502010	G	A	0.201	0.158716	0.0481758	3.09788	0.00182622
22	22:60517108	60517108	T	C	0.201	0.158716	0.0481758	3.09788	0.00182622
23	23:48996103	48996103	T	C	0.075	0.24313	0.0751057	3.40667	0.00184891
12	12:70728343	70728343	T	C	0.195	-0.156168	0.0488899	4.00545	0.00185373
37	37:24151749	24151749	T	C	0.374	0.136707	0.0427551	4.46195	0.00185607
27	27:42321151	42321151	C	T	0.473	-0.134625	0.0417848	3.54829	0.00186308
37	37:24702123	24702123	C	T	0.37	0.13622	0.0426411	3.93473	0.00186538
37	37:24723302	24723302	G	A	0.37	0.13622	0.0426411	3.93473	0.00186538
11	11:39695032	39695032	A	T	0.352	-0.147303	0.0429256	2.63165	0.0018888
29	29:39107083	39107083	A	G	0.431	0.132602	0.0408257	3.29034	0.0018913
11	11:43377715	43377715	G	A	0.41	-0.133278	0.0407485	3.1951	0.00189897
11	11:43381098	43381098	G	A	0.41	-0.133278	0.0407485	3.1951	0.00189897
21	21:3442111	3442111	G	A	0.169	-0.1621	0.0509194	4.3168	0.0019157
21	21:3550897	3550897	G	A	0.169	-0.1621	0.0509194	4.3168	0.0019157
39	39:70339651	70339651	A	G	0.383	0.106081	0.0333159	3.85886	0.00194496
22	22:60594142	60594142	C	T	0.295	0.133289	0.0405766	3.05241	0.00194524
22	22:60600714	60600714	C	T	0.362	0.124118	0.0382646	3.2695	0.00194906
22	22:60601217	60601217	G	A	0.362	0.124118	0.0382646	3.2695	0.00194906
22	22:60602473	60602473	T	C	0.362	0.124118	0.0382646	3.2695	0.00194906
20	20:49220851	49220851	C	T	0.082	-0.22369	0.0702297	4.58848	0.00196156
4	4:67328160	67328160	G	A	0.151	0.183957	0.0572127	3.46098	0.00196161
14	14:31270996	31270996	A	C	0.406	-0.132951	0.0414912	3.55957	0.00196863
14	14:32689464	32689464	A	C	0.473	-0.125398	0.0394216	3.84954	0.0019703
36	36:27229825	27229825	A	T	0.195	-0.156812	0.0491265	3.66095	0.00197117
21	21:3884033	3884033	G	A	0.266	-0.144547	0.0454958	3.90256	0.00197597
22	22:60465427	60465427	G	A	0.203	0.156496	0.0480588	3.16118	0.00197983
30	30:18263672	18263672	A	G	0.354	0.145447	0.0452041	3.42633	0.00198428
37	37:23918008	23918008	T	C	0.398	0.131223	0.0409641	4.95281	0.00199131
37	37:24240188	24240188	C	T	0.46	0.129471	0.0408512	4.24213	0.00199518
12	12:70735202	70735202	T	C	0.193	-0.155063	0.0489196	4.04378	0.001996
25	25:37209483	37209483	A	G	0.467	0.131117	0.0413954	4.25662	0.00200813
25	25:37228750	37228750	T	C	0.467	0.131117	0.0413954	4.25662	0.00200813
22	22:61049732	61049732	A	G	0.259	-0.141686	0.044556	3.68539	0.00204095
22	22:61060910	61060910	A	C	0.259	-0.141686	0.044556	3.68539	0.00204095
1	1:94574133	94574133	C	G	0.345	0.139269	0.0435948	3.52306	0.00204596
4	4:23591037	23591037	G	A	0.069	0.252546	0.0788944	5.06859	0.00205305
4	4:23653394	23653394	C	T	0.069	0.252546	0.0788944	5.06859	0.00205305
4	4:23660587	23660587	T	C	0.069	0.252546	0.0788944	5.06859	0.00205305
20	20:49441410	49441410	G	A	0.289	-0.147156	0.0463846	3.72908	0.00205983
12	12:70603481	70603481	A	T	0.307	-0.138488	0.0432304	5.14053	0.00208176
17	17:26816054	26816054	C	G	0.201	0.16855	0.0533577	3.905	0.00209154
17	17:27087821	27087821	C	T	0.201	0.16855	0.0533577	3.905	0.00209154
31	31:15832689	15832689	T	G	0.157	0.165967	0.0526232	4.07509	0.00209221
11	11:39589760	39589760	A	T	0.333	-0.14677	0.0445169	2.95527	0.00209313
11	11:39597535	39597535	T	C	0.333	-0.14677	0.0445169	2.95527	0.00209313
11	11:39633814	39633814	A	G	0.333	-0.14677	0.0445169	2.95527	0.00209313
11	11:39651104	39651104	A	G	0.333	-0.14677	0.0445169	2.95527	0.00209313
11	11:39682220	39682220	G	A	0.333	-0.14677	0.0445169	2.95527	0.00209313
4	4:25423549	25423549	C	T	0.063	0.262488	0.0822112	5.04765	0.00209382
37	37:23847692	23847692	G	T	0.352	0.130783	0.0411808	4.79577	0.00209551
37	37:23884086	23884086	A	G	0.352	0.130783	0.0411808	4.79577	0.00209551
37	37:23905874	23905874	C	G	0.352	0.130783	0.0411808	4.79577	0.00209551
30	30:17815920	17815920	C	G	0.324	0.150878	0.0471591	3.43609	0.00209669
36	36:27233570	27233570	A	G	0.215	-0.15081	0.0476041	3.70646	0.00209917
20	20:49046921	49046921	C	T	0.075	-0.228495	0.0723453	4.47629	0.00210027
20	20:49052455	49052455	G	A	0.075	-0.228495	0.0723453	4.47629	0.00210027
23	23:35936781	35936781	C	T	0.308	0.136092	0.0429721	3.71514	0.00210245
20	20:49355696	49355696	A	G	0.077	-0.225657	0.0715294	4.40109	0.00210765
20	20:49357031	49357031	C	G	0.077	-0.225657	0.0715294	4.40109	0.00210765
25	25:47771725	47771725	C	T	0.167	0.172259	0.0547046	4.47949	0.00216176
26	26:9203091	9203091	C	T	0.421	0.12899	0.0409611	3.87575	0.00216502
21	21:2257132	2257132	T	A	0.232	-0.146109	0.0465133	4.17209	0.00217388
4	4:37731266	37731266	T	C	0.224	0.155	0.0490749	3.6354	0.00220957
29	29:39998078	39998078	A	G	0.272	0.141738	0.0448942	3.62465	0.0022118
37	37:24725645	24725645	A	G	0.351	0.13409	0.042488	3.65486	0.00221278
26	26:10697778	10697778	T	C	0.421	0.135436	0.0430294	3.76375	0.002221
12	12:70306409	70306409	A	C	0.069	-0.244866	0.0777126	4.71206	0.00222527
37	37:24578154	24578154	T	C	0.508	0.135809	0.0432802	4.46866	0.0022348
38	38:15534208	15534208	T	C	0.467	0.128608	0.0404701	3.38541	0.00226194
11	11:39227633	39227633	A	G	0.352	-0.145426	0.0451844	3.16444	0.00229268
11	11:39232451	39232451	C	T	0.352	-0.145426	0.0451844	3.16444	0.00229268
4	4:36750905	36750905	C	T	0.215	0.158021	0.0502877	3.67709	0.00229943
37	37:28015935	28015935	G	A	0.366	-0.141064	0.0441	3.19582	0.00235215
5	5:21334215	21334215	A	G	0.138	0.186006	0.0591427	3.54444	0.00236753
5	5:21360175	21360175	C	T	0.138	0.186006	0.0591427	3.54444	0.00236753
5	5:21368099	21368099	A	G	0.138	0.186006	0.0591427	3.54444	0.00236753
5	5:21396278	21396278	C	A	0.138	0.186006	0.0591427	3.54444	0.00236753
5	5:21409119	21409119	G	T	0.138	0.186006	0.0591427	3.54444	0.00236753
11	11:43614040	43614040	A	G	0.427	-0.135267	0.0411099	2.83936	0.00238321
16	16:46429620	46429620	C	T	0.14	-0.182761	0.0580722	3.48513	0.00239919
4	4:53143967	53143967	G	A	0.387	-0.134454	0.0426336	3.44026	0.00240116
23	23:36010030	36010030	T	C	0.276	0.141719	0.0452318	3.59634	0.00240844
4	4:24714756	24714756	A	G	0.098	0.205164	0.064538	5.41497	0.00242756
22	22:45574423	45574423	T	C	0.069	-0.235809	0.0745202	5.26471	0.00243542
22	22:45577084	45577084	G	A	0.069	-0.235809	0.0745202	5.26471	0.00243542
11	11:43742625	43742625	T	A	0.316	-0.141869	0.0441975	3.12263	0.00244044
37	37:22959309	22959309	C	A	0.416	-0.131427	0.0423288	4.00463	0.00244556
30	30:18491882	18491882	A	G	0.318	0.151004	0.0478552	3.36679	0.00247788
30	30:18685995	18685995	C	G	0.318	0.151004	0.0478552	3.36679	0.00247788
30	30:18831402	18831402	A	G	0.318	0.151004	0.0478552	3.36679	0.00247788
30	30:18841336	18841336	G	A	0.318	0.151004	0.0478552	3.36679	0.00247788
30	30:18950833	18950833	A	G	0.318	0.151004	0.0478552	3.36679	0.00247788
30	30:18967938	18967938	T	C	0.318	0.151004	0.0478552	3.36679	0.00247788
30	30:18968994	18968994	A	G	0.318	0.151004	0.0478552	3.36679	0.00247788
30	30:18987042	18987042	A	G	0.318	0.151004	0.0478552	3.36679	0.00247788
30	30:19004965	19004965	T	G	0.318	0.151004	0.0478552	3.36679	0.00247788
30	30:19028552	19028552	T	C	0.318	0.151004	0.0478552	3.36679	0.00247788
30	30:19029808	19029808	T	C	0.318	0.151004	0.0478552	3.36679	0.00247788
30	30:19031231	19031231	G	A	0.318	0.151004	0.0478552	3.36679	0.00247788
20	20:49403653	49403653	C	T	0.287	-0.145632	0.0467962	3.71769	0.00248809
11	11:25253061	25253061	A	G	0.278	-0.146081	0.0459761	3.22344	0.0024958
21	21:4633219	4633219	G	A	0.167	-0.158136	0.0510663	4.30271	0.00250155
21	21:4637914	4637914	C	T	0.167	-0.158136	0.0510663	4.30271	0.00250155
11	11:35565549	35565549	G	A	0.343	0.132037	0.0410058	3.0177	0.00250929
11	11:35567453	35567453	A	G	0.343	0.132037	0.0410058	3.0177	0.00250929
11	11:35589335	35589335	A	G	0.343	0.132037	0.0410058	3.0177	0.00250929
11	11:35593183	35593183	C	A	0.343	0.132037	0.0410058	3.0177	0.00250929
11	11:39466011	39466011	C	T	0.42	-0.144284	0.0445069	2.96314	0.00251213
33	33:11641185	11641185	T	C	0.09	-0.221972	0.0703801	5.30078	0.00253145
38	38:15614511	15614511	G	A	0.312	0.138698	0.0428398	2.92257	0.00254265
39	39:41249973	41249973	T	A	0.213	0.119966	0.0388242	4.21723	0.00254505
23	23:36004495	36004495	A	G	0.278	0.140882	0.0453013	3.64021	0.00255681
16	16:46272740	46272740	C	T	0.138	-0.181711	0.0582436	3.5296	0.00257011
16	16:46295135	46295135	G	C	0.138	-0.181711	0.0582436	3.5296	0.00257011
16	16:46329630	46329630	A	C	0.138	-0.181711	0.0582436	3.5296	0.00257011
30	30:17641936	17641936	A	C	0.349	0.141058	0.0452752	3.57801	0.00257773
30	30:17660891	17660891	G	A	0.349	0.141058	0.0452752	3.57801	0.00257773
39	39:68773165	68773165	C	A	0.448	0.102006	0.0325047	3.37572	0.00257868
37	37:23924979	23924979	C	T	0.477	0.124521	0.0402706	4.52438	0.0025889
38	38:23159067	23159067	C	A	0.439	0.12039	0.038338	5.21467	0.0025943
38	38:23159148	23159148	A	G	0.439	0.12039	0.038338	5.21467	0.0025943
16	16:46278262	46278262	A	C	0.146	-0.174616	0.0559468	3.47671	0.00260431
25	25:38842216	38842216	A	G	0.128	0.178823	0.0574952	3.55808	0.00261918
30	30:16536866	16536866	A	C	0.354	0.138315	0.0447522	3.78166	0.00263583
36	36:26908106	26908106	A	T	0.195	-0.151881	0.048942	3.59573	0.00264044
36	36:26914359	26914359	T	G	0.195	-0.151881	0.048942	3.59573	0.00264044
30	30:20047402	20047402	C	G	0.32	0.149842	0.0478837	3.39958	0.00264666
30	30:20065407	20065407	G	A	0.32	0.149842	0.0478837	3.39958	0.00264666
37	37:23140975	23140975	G	A	0.19	0.158747	0.051601	4.29676	0.00265999
37	37:23300604	23300604	C	A	0.253	0.139903	0.0455231	4.04068	0.00268493
11	11:38657464	38657464	T	C	0.398	-0.13407	0.042355	3.16053	0.00268916
4	4:37796797	37796797	T	C	0.23	0.152368	0.0492537	3.63346	0.00269852
4	4:37808412	37808412	G	A	0.23	0.152368	0.0492537	3.63346	0.00269852
1	1:12578940	12578940	G	A	0.065	0.251607	0.0806801	5.12358	0.002704
1	1:12868228	12868228	A	G	0.065	0.251607	0.0806801	5.12358	0.002704
1	1:12880943	12880943	T	A	0.065	0.251607	0.0806801	5.12358	0.002704
1	1:12887341	12887341	A	G	0.065	0.251607	0.0806801	5.12358	0.002704
1	1:12889359	12889359	G	T	0.065	0.251607	0.0806801	5.12358	0.002704
1	1:12966209	12966209	A	C	0.065	0.251607	0.0806801	5.12358	0.002704
21	21:38026994	38026994	G	A	0.241	0.146937	0.0461284	3.0207	0.00272611
37	37:23896371	23896371	C	T	0.36	0.12693	0.040994	4.88663	0.00273251
12	12:70653882	70653882	A	G	0.295	-0.13748	0.044586	4.70807	0.00273463
14	14:35180233	35180233	A	C	0.458	0.121676	0.0396893	4.04294	0.00275009
36	36:28841796	28841796	A	G	0.205	-0.147683	0.0479656	4.6677	0.00275352
11	11:38591241	38591241	C	G	0.466	-0.131868	0.0414048	3.04429	0.00275991
14	14:32755099	32755099	T	A	0.502	0.120513	0.039193	3.78293	0.00276577
20	20:49361234	49361234	A	G	0.282	-0.140991	0.04604	4.11515	0.00276805
22	22:8866167	8866167	C	T	0.333	0.142274	0.0450845	3.13387	0.00276863
19	19:52640101	52640101	G	C	0.117	-0.192381	0.0626638	4.52053	0.00276868
19	19:52652655	52652655	A	G	0.117	-0.192381	0.0626638	4.52053	0.00276868
17	17:27580192	27580192	G	A	0.193	0.165651	0.0540943	4.07724	0.00277452
26	26:11468901	11468901	A	G	0.414	0.130888	0.0425709	3.74699	0.00278629
26	26:11471213	11471213	A	G	0.414	0.130888	0.0425709	3.74699	0.00278629
26	26:11478902	11478902	T	C	0.414	0.130888	0.0425709	3.74699	0.00278629
29	29:38897038	38897038	G	A	0.46	0.125954	0.0405019	3.38965	0.00279359
36	36:27295356	27295356	C	T	0.188	-0.153407	0.0499159	3.73868	0.0027938
39	39:66176391	66176391	G	T	0.303	-0.110119	0.0360055	4.1445	0.00280109
21	21:5074713	5074713	T	C	0.238	-0.14245	0.0466285	4.1194	0.00283094
21	21:5087674	5087674	A	C	0.238	-0.14245	0.0466285	4.1194	0.00283094
21	21:5097741	5097741	C	T	0.238	-0.14245	0.0466285	4.1194	0.00283094
21	21:5120486	5120486	A	C	0.238	-0.14245	0.0466285	4.1194	0.00283094
23	23:49026003	49026003	A	G	0.065	0.25342	0.0812674	3.28417	0.00283606
12	12:71175761	71175761	T	C	0.14	-0.173565	0.0557496	3.3424	0.00283792
1	1:121217108	121217108	A	G	0.427	0.116091	0.0378487	3.69143	0.00287835
22	22:60600473	60600473	C	T	0.307	0.121584	0.0393389	3.44385	0.00289109
22	22:60602058	60602058	G	A	0.307	0.121584	0.0393389	3.44385	0.00289109
30	30:18155721	18155721	G	A	0.349	0.141299	0.0458067	3.4964	0.00291421
22	22:3603276	3603276	A	G	0.391	0.136789	0.0427474	2.89041	0.00291725
22	22:3635773	3635773	C	T	0.391	0.136789	0.0427474	2.89041	0.00291725
22	22:3704499	3704499	T	C	0.391	0.136789	0.0427474	2.89041	0.00291725
22	22:60469197	60469197	G	A	0.207	0.147388	0.0473805	3.28155	0.00291971
14	14:58301654	58301654	T	C	0.228	-0.140281	0.0459773	4.54123	0.00293939
1	1:95550594	95550594	G	A	0.32	0.139555	0.0454352	3.59077	0.00295014
1	1:95660756	95660756	G	C	0.32	0.139555	0.0454352	3.59077	0.00295014
1	1:95747151	95747151	T	C	0.32	0.139555	0.0454352	3.59077	0.00295014
36	36:27258591	27258591	A	C	0.161	-0.160089	0.0524823	3.81476	0.00295182
11	11:38586644	38586644	T	A	0.351	-0.134738	0.0431663	3.2202	0.00296013
30	30:17524638	17524638	G	A	0.351	0.137863	0.0449868	3.62609	0.00296991
4	4:53139923	53139923	T	C	0.391	-0.131627	0.0426426	3.41864	0.00298001
4	4:53141045	53141045	C	T	0.391	-0.131627	0.0426426	3.41864	0.00298001
4	4:53141491	53141491	C	T	0.391	-0.131627	0.0426426	3.41864	0.00298001
4	4:53317981	53317981	C	T	0.391	-0.131627	0.0426426	3.41864	0.00298001
36	36:27360408	27360408	T	A	0.163	-0.159306	0.0522533	3.77015	0.00299326
4	4:51794473	51794473	C	T	0.45	-0.131359	0.0429789	3.67405	0.00299439
34	34:35494924	35494924	A	G	0.307	0.128225	0.0419909	3.70453	0.00299833
36	36:27292295	27292295	A	G	0.155	-0.161552	0.0530328	3.7845	0.00300345
29	29:38960989	38960989	T	C	0.435	0.128331	0.0411764	3.19937	0.00301612
30	30:18168898	18168898	T	C	0.32	0.148051	0.0479213	3.37806	0.00302117
30	30:18251957	18251957	C	G	0.32	0.148051	0.0479213	3.37806	0.00302117
30	30:18304745	18304745	A	G	0.32	0.148051	0.0479213	3.37806	0.00302117
38	38:19712703	19712703	A	G	0.284	-0.131964	0.043505	4.23055	0.00302403
38	38:19713694	19713694	A	G	0.284	-0.131964	0.043505	4.23055	0.00302403
22	22:11012981	11012981	C	T	0.372	0.137896	0.0444062	3.22807	0.00303743
29	29:38918249	38918249	G	A	0.464	0.125702	0.0405502	3.26684	0.00306203
11	11:38431249	38431249	C	T	0.364	-0.134493	0.0424003	2.94992	0.00306866
11	11:38433473	38433473	A	G	0.364	-0.134493	0.0424003	2.94992	0.00306866
22	22:60355467	60355467	G	A	0.211	0.149279	0.0477274	3.10047	0.0030756
22	22:60382875	60382875	G	A	0.211	0.149279	0.0477274	3.10047	0.0030756
37	37:24715459	24715459	A	G	0.448	-0.138398	0.0451619	3.49343	0.0030843
17	17:26637802	26637802	C	T	0.195	0.163063	0.0538412	4.0065	0.00308471
17	17:26651411	26651411	T	C	0.195	0.163063	0.0538412	4.0065	0.00308471
17	17:26660509	26660509	C	T	0.195	0.163063	0.0538412	4.0065	0.00308471
11	11:36465116	36465116	T	C	0.477	0.13079	0.0432156	4.05725	0.00309737
11	11:39613780	39613780	G	A	0.481	-0.136373	0.04316	3.00897	0.00310169
11	11:39667750	39667750	C	G	0.481	-0.136373	0.04316	3.00897	0.00310169
25	25:25084862	25084862	A	G	0.262	0.143786	0.0474192	3.83265	0.00311146
4	4:51691817	51691817	G	A	0.45	-0.131293	0.0431249	3.65671	0.00311581
4	4:51704950	51704950	T	C	0.45	-0.131293	0.0431249	3.65671	0.00311581
11	11:38649531	38649531	A	G	0.377	-0.133335	0.0435867	3.52428	0.00311698
22	22:6042814	6042814	G	A	0.452	0.1353	0.0424588	2.85684	0.00312488
22	22:6072585	6072585	A	T	0.452	0.1353	0.0424588	2.85684	0.00312488
11	11:39238924	39238924	C	G	0.322	-0.142913	0.0451345	2.96448	0.0031361
38	38:23150138	23150138	G	A	0.435	0.118955	0.0387443	5.12832	0.0031404
38	38:23153080	23153080	G	A	0.435	0.118955	0.0387443	5.12832	0.0031404
30	30:18791228	18791228	C	A	0.32	0.147363	0.0478323	3.34947	0.00314604
30	30:18810040	18810040	T	C	0.32	0.147363	0.0478323	3.34947	0.00314604
30	30:18810507	18810507	C	T	0.32	0.147363	0.0478323	3.34947	0.00314604
30	30:18852437	18852437	A	T	0.32	0.147363	0.0478323	3.34947	0.00314604
30	30:18861385	18861385	T	C	0.32	0.147363	0.0478323	3.34947	0.00314604
30	30:18933274	18933274	C	T	0.32	0.147363	0.0478323	3.34947	0.00314604
30	30:18962779	18962779	C	T	0.32	0.147363	0.0478323	3.34947	0.00314604
30	30:18977268	18977268	G	A	0.32	0.147363	0.0478323	3.34947	0.00314604
30	30:19003213	19003213	G	C	0.32	0.147363	0.0478323	3.34947	0.00314604
30	30:19014490	19014490	A	G	0.32	0.147363	0.0478323	3.34947	0.00314604
23	23:35569919	35569919	C	T	0.31	0.130343	0.0428848	3.66004	0.00315376
39	39:70934122	70934122	A	G	0.429	0.0987186	0.0325722	3.75825	0.0031664
22	22:5218260	5218260	G	A	0.393	0.137077	0.0432014	2.88594	0.00318771
22	22:60439175	60439175	T	C	0.241	0.141381	0.0451959	3.05773	0.00318954
1	1:94305222	94305222	G	A	0.381	0.12991	0.0425121	3.48239	0.00319026
1	1:37788346	37788346	A	G	0.1	-0.205632	0.0682164	4.20739	0.0031994
39	39:87321108	87321108	T	C	0.412	-0.0998482	0.0331093	4.02103	0.00320088
17	17:43431546	43431546	T	G	0.264	-0.151249	0.0495386	3.48191	0.00320405
36	36:27255554	27255554	T	G	0.192	-0.15057	0.0497838	3.78128	0.00321247
21	21:6478117	6478117	A	G	0.121	-0.178543	0.0591436	3.86759	0.00321833
4	4:65538033	65538033	G	T	0.452	-0.125495	0.0413974	3.70622	0.00322228
12	12:70484823	70484823	G	A	0.157	-0.159227	0.0527372	3.84352	0.00322713
12	12:70490090	70490090	A	G	0.157	-0.159227	0.0527372	3.84352	0.00322713
11	11:39155602	39155602	C	A	0.427	-0.135911	0.0436119	3.13542	0.00323114
30	30:17691387	17691387	A	T	0.406	0.139156	0.0439195	2.90969	0.00323137
4	4:36940129	36940129	G	A	0.22	0.151444	0.0499454	3.63356	0.00325687
4	4:36944650	36944650	G	A	0.22	0.151444	0.0499454	3.63356	0.00325687
26	26:9163462	9163462	T	A	0.408	0.12602	0.0418592	4.0017	0.0032583
20	20:48747782	48747782	G	A	0.312	-0.132636	0.0440454	3.91727	0.00326805
2	2:8769459	8769459	G	A	0.178	-0.165399	0.0548639	3.85959	0.00328016
14	14:58406032	58406032	A	G	0.197	-0.144133	0.047706	4.69172	0.00329118
30	30:16918388	16918388	A	G	0.324	0.142807	0.0465855	3.34701	0.00330475
30	30:17550184	17550184	C	T	0.322	0.145727	0.0478156	3.44491	0.00333527
30	30:17606559	17606559	T	C	0.322	0.145727	0.0478156	3.44491	0.00333527
30	30:17640974	17640974	G	A	0.322	0.145727	0.0478156	3.44491	0.00333527
30	30:17662586	17662586	A	G	0.322	0.145727	0.0478156	3.44491	0.00333527
21	21:5147333	5147333	C	G	0.245	-0.140168	0.0467302	4.1905	0.00334444
30	30:19593096	19593096	A	G	0.324	0.144691	0.0475732	3.47977	0.00335073
26	26:10302615	10302615	A	G	0.458	-0.125116	0.0416973	4.36716	0.00335869
26	26:10312805	10312805	G	A	0.458	-0.125116	0.0416973	4.36716	0.00335869
1	1:37790513	37790513	A	G	0.057	-0.254234	0.084798	4.23996	0.00336236
29	29:40177556	40177556	T	C	0.305	0.128855	0.0424761	3.49445	0.00336375
1	1:121630495	121630495	C	T	0.479	0.119873	0.038094	2.91341	0.00337027
1	1:94406267	94406267	G	A	0.341	0.135491	0.0444611	3.40101	0.00338242
1	1:94409451	94409451	T	C	0.341	0.135491	0.0444611	3.40101	0.00338242
1	1:94418070	94418070	G	A	0.341	0.135491	0.0444611	3.40101	0.00338242
1	1:94419974	94419974	G	A	0.341	0.135491	0.0444611	3.40101	0.00338242
1	1:94435328	94435328	G	A	0.341	0.135491	0.0444611	3.40101	0.00338242
1	1:94436880	94436880	G	A	0.341	0.135491	0.0444611	3.40101	0.00338242
1	1:94446622	94446622	T	C	0.341	0.135491	0.0444611	3.40101	0.00338242
1	1:94470931	94470931	T	C	0.341	0.135491	0.0444611	3.40101	0.00338242
1	1:94563754	94563754	G	C	0.341	0.135491	0.0444611	3.40101	0.00338242
1	1:94588250	94588250	T	C	0.341	0.135491	0.0444611	3.40101	0.00338242
1	1:94612412	94612412	A	G	0.341	0.135491	0.0444611	3.40101	0.00338242
1	1:94616318	94616318	A	G	0.341	0.135491	0.0444611	3.40101	0.00338242
1	1:94624516	94624516	A	G	0.341	0.135491	0.0444611	3.40101	0.00338242
1	1:94632821	94632821	T	C	0.341	0.135491	0.0444611	3.40101	0.00338242
22	22:60707652	60707652	G	C	0.379	0.115217	0.0374364	3.20605	0.00339285
5	5:21345371	21345371	C	T	0.14	0.178473	0.0590069	3.56437	0.0033978
5	5:21352075	21352075	A	C	0.14	0.178473	0.0590069	3.56437	0.0033978
5	5:21363248	21363248	C	T	0.14	0.178473	0.0590069	3.56437	0.0033978
5	5:21397969	21397969	C	T	0.14	0.178473	0.0590069	3.56437	0.0033978
5	5:21560986	21560986	G	C	0.14	0.178473	0.0590069	3.56437	0.0033978
17	17:27789934	27789934	T	C	0.195	0.162295	0.0541877	4.07332	0.00339817
17	17:27794314	27794314	A	C	0.195	0.162295	0.0541877	4.07332	0.00339817
4	4:36790787	36790787	G	A	0.216	0.149945	0.0497691	3.69304	0.00339908
39	39:55475071	55475071	G	A	0.469	0.0988235	0.0326987	3.57807	0.00340142
39	39:55478609	55478609	G	A	0.469	0.0988235	0.0326987	3.57807	0.00340142
23	23:48817695	48817695	T	G	0.069	0.245006	0.0796522	3.18476	0.00341735
1	1:94627343	94627343	A	G	0.437	0.132575	0.043904	3.58381	0.00342564
17	17:24833843	24833843	T	C	0.226	0.154113	0.0515049	4.0635	0.00342954
16	16:45294899	45294899	G	A	0.167	-0.173516	0.0576613	3.69009	0.00343268
16	16:45311438	45311438	G	A	0.167	-0.173516	0.0576613	3.69009	0.00343268
3	3:83793021	83793021	C	A	0.358	-0.12755	0.0425181	3.82796	0.00343463
22	22:61015255	61015255	T	C	0.274	-0.130217	0.0432696	3.69037	0.00343635
38	38:2740420	2740420	A	G	0.387	-0.118205	0.0395175	4.0231	0.00344115
39	39:84958998	84958998	T	A	0.441	-0.0960456	0.0320411	3.84417	0.00344374
4	4:51530268	51530268	T	G	0.446	-0.13153	0.0435504	3.55848	0.00344928
29	29:38915868	38915868	C	A	0.477	0.122416	0.0398411	3.19535	0.00345735
20	20:48547953	48547953	G	A	0.389	-0.127112	0.0424895	3.96366	0.0034593
37	37:23928067	23928067	T	C	0.46	0.124023	0.0412505	4.72389	0.00345931
12	12:70441065	70441065	A	G	0.063	-0.239067	0.0799593	4.33398	0.00346083
12	12:70448273	70448273	A	G	0.063	-0.239067	0.0799593	4.33398	0.00346083
30	30:20268179	20268179	A	G	0.322	0.145779	0.04792	3.3947	0.00346255
1	1:95252252	95252252	A	G	0.456	0.131371	0.0435369	3.58372	0.00346304
1	1:95281712	95281712	C	T	0.456	0.131371	0.0435369	3.58372	0.00346304
22	22:60546068	60546068	C	T	0.33	0.11817	0.0391953	3.5881	0.00346484
7	7:63548062	63548062	T	C	0.496	0.128339	0.0428613	3.87213	0.00347774
23	23:47854749	47854749	C	T	0.1	0.196045	0.0652457	3.67102	0.00347828
38	38:16958203	16958203	A	C	0.092	0.218491	0.0705197	3.07336	0.00351339
7	7:80729198	80729198	C	T	0.408	-0.123442	0.0407833	3.46609	0.00352706
17	17:26853878	26853878	C	T	0.197	0.161127	0.053891	3.81732	0.00354264
17	17:26857204	26857204	G	A	0.197	0.161127	0.053891	3.81732	0.00354264
17	17:26871786	26871786	G	C	0.197	0.161127	0.053891	3.81732	0.00354264
17	17:26876371	26876371	A	G	0.197	0.161127	0.053891	3.81732	0.00354264
17	17:26894693	26894693	G	A	0.197	0.161127	0.053891	3.81732	0.00354264
37	37:27005837	27005837	G	T	0.454	0.11766	0.0392462	4.71708	0.00354651
23	23:35619819	35619819	A	G	0.318	0.128767	0.0429634	3.66915	0.00357139
23	23:35622498	35622498	G	A	0.318	0.128767	0.0429634	3.66915	0.00357139
23	23:35674044	35674044	T	C	0.318	0.128767	0.0429634	3.66915	0.00357139
36	36:27917913	27917913	G	C	0.255	-0.140903	0.0467048	3.47005	0.00357688
29	29:38199034	38199034	G	A	0.151	0.161071	0.0536408	3.5956	0.00357984
14	14:32841720	32841720	G	A	0.368	-0.125617	0.0420747	3.82819	0.00358698
21	21:4299801	4299801	C	T	0.205	-0.144401	0.0484928	4.01095	0.00358989
36	36:27260745	27260745	G	A	0.159	-0.157295	0.0527086	3.82734	0.00359346
37	37:24208105	24208105	A	G	0.412	0.121022	0.040587	4.54818	0.00362148
37	37:24208577	24208577	A	G	0.412	0.121022	0.040587	4.54818	0.00362148
21	21:5237153	5237153	C	T	0.243	-0.138621	0.0466371	4.21786	0.0036284
21	21:5656805	5656805	C	T	0.243	-0.138621	0.0466371	4.21786	0.0036284
21	21:5676897	5676897	G	A	0.243	-0.138621	0.0466371	4.21786	0.0036284
2	2:7346249	7346249	G	C	0.134	-0.185485	0.062397	4.28695	0.00363399
39	39:41618504	41618504	A	T	0.215	0.115835	0.0389827	4.20378	0.00363658
4	4:65289654	65289654	T	C	0.462	-0.122003	0.0408739	3.78638	0.00363661
4	4:65306631	65306631	C	T	0.462	-0.122003	0.0408739	3.78638	0.00363661
11	11:38435917	38435917	T	C	0.345	-0.132896	0.0436656	3.27821	0.00364418
11	11:38460376	38460376	T	C	0.345	-0.132896	0.0436656	3.27821	0.00364418
11	11:38481486	38481486	T	C	0.345	-0.132896	0.0436656	3.27821	0.00364418
38	38:23276364	23276364	T	C	0.448	0.117294	0.0384694	5.4231	0.00365902
9	9:15494178	15494178	G	T	0.19	-0.160785	0.0539596	4.58248	0.00366104
9	9:15498602	15498602	A	G	0.19	-0.160785	0.0539596	4.58248	0.00366104
9	9:15636457	15636457	G	A	0.19	-0.160785	0.0539596	4.58248	0.00366104
9	9:15954844	15954844	T	C	0.19	-0.160785	0.0539596	4.58248	0.00366104
22	22:10219792	10219792	A	G	0.314	0.1408	0.0464901	3.32036	0.00367064
22	22:10228767	10228767	G	A	0.314	0.1408	0.0464901	3.32036	0.00367064
22	22:10229048	10229048	C	A	0.314	0.1408	0.0464901	3.32036	0.00367064
22	22:10238630	10238630	A	G	0.314	0.1408	0.0464901	3.32036	0.00367064
22	22:10246717	10246717	C	T	0.314	0.1408	0.0464901	3.32036	0.00367064
22	22:10247193	10247193	C	T	0.314	0.1408	0.0464901	3.32036	0.00367064
22	22:10250489	10250489	C	T	0.314	0.1408	0.0464901	3.32036	0.00367064
22	22:10250787	10250787	C	T	0.314	0.1408	0.0464901	3.32036	0.00367064
22	22:10266286	10266286	T	C	0.314	0.1408	0.0464901	3.32036	0.00367064
22	22:10282048	10282048	C	T	0.314	0.1408	0.0464901	3.32036	0.00367064
22	22:10291794	10291794	C	T	0.314	0.1408	0.0464901	3.32036	0.00367064
22	22:10294479	10294479	T	G	0.314	0.1408	0.0464901	3.32036	0.00367064
22	22:10297495	10297495	G	A	0.314	0.1408	0.0464901	3.32036	0.00367064
27	27:32402748	32402748	G	A	0.379	-0.131247	0.043724	3.56016	0.00367127
27	27:32425868	32425868	A	G	0.379	-0.131247	0.043724	3.56016	0.00367127
27	27:32428530	32428530	G	A	0.379	-0.131247	0.043724	3.56016	0.00367127
27	27:32430636	32430636	G	A	0.379	-0.131247	0.043724	3.56016	0.00367127
27	27:32466077	32466077	T	C	0.379	-0.131247	0.043724	3.56016	0.00367127
21	21:4974263	4974263	T	C	0.207	-0.141912	0.047794	4.01545	0.00368078
21	21:4976062	4976062	C	A	0.207	-0.141912	0.047794	4.01545	0.00368078
15	15:44001348	44001348	A	G	0.056	0.252859	0.0847101	3.69332	0.00368141
1	1:94531334	94531334	G	A	0.377	0.130199	0.0432331	3.45824	0.00368363
30	30:17902976	17902976	C	T	0.341	0.135426	0.0453904	3.72855	0.00368829
37	37:23377830	23377830	A	G	0.159	0.166603	0.056014	4.52057	0.00369093
27	27:40944846	40944846	C	A	0.467	-0.125384	0.042175	3.87304	0.00369594
37	37:23132411	23132411	G	A	0.151	0.168535	0.0567517	4.41227	0.00369769
14	14:35496395	35496395	A	G	0.452	0.120202	0.0405156	4.0622	0.00369787
14	14:35496719	35496719	G	A	0.452	0.120202	0.0405156	4.0622	0.00369787
25	25:37215242	37215242	C	T	0.441	0.127791	0.0431041	4.08851	0.00371806
14	14:57840620	57840620	T	C	0.102	-0.200865	0.067444	4.65252	0.00372011
30	30:20813694	20813694	T	C	0.418	0.135685	0.0444113	3.17679	0.00372794
30	30:20818400	20818400	C	A	0.418	0.135685	0.0444113	3.17679	0.00372794
30	30:20826835	20826835	C	T	0.418	0.135685	0.0444113	3.17679	0.00372794
1	1:31875794	31875794	G	A	0.054	-0.259888	0.0876971	4.29814	0.0037358
1	1:31892544	31892544	A	G	0.054	-0.259888	0.0876971	4.29814	0.0037358
1	1:31894464	31894464	T	C	0.054	-0.259888	0.0876971	4.29814	0.0037358
1	1:31899876	31899876	A	C	0.054	-0.259888	0.0876971	4.29814	0.0037358
39	39:67666510	67666510	C	T	0.462	0.0981251	0.0327481	3.51382	0.00375782
39	39:67687530	67687530	C	T	0.462	0.0981251	0.0327481	3.51382	0.00375782
5	5:70693187	70693187	A	T	0.318	-0.135723	0.0458082	4.00446	0.0037598
37	37:23852562	23852562	T	C	0.351	0.122651	0.0412106	4.68942	0.00377059
20	20:46960474	46960474	C	T	0.368	-0.12953	0.0437685	4.0086	0.00379162
19	19:35643010	35643010	T	C	0.312	0.124393	0.0419839	3.90349	0.0037946
33	33:15776863	15776863	G	A	0.132	0.178097	0.0601373	4.43138	0.00379478
33	33:15787459	15787459	C	A	0.132	0.178097	0.0601373	4.43138	0.00379478
33	33:15798864	15798864	T	A	0.132	0.178097	0.0601373	4.43138	0.00379478
36	36:26770342	26770342	T	G	0.19	-0.150071	0.0502945	3.58085	0.00380972
36	36:26773696	26773696	T	C	0.19	-0.150071	0.0502945	3.58085	0.00380972
36	36:26775647	26775647	C	T	0.19	-0.150071	0.0502945	3.58085	0.00380972
1	1:93509044	93509044	T	C	0.45	0.128637	0.0429801	3.5014	0.00381616
1	1:93512419	93512419	T	C	0.45	0.128637	0.0429801	3.5014	0.00381616
1	1:93535420	93535420	A	C	0.45	0.128637	0.0429801	3.5014	0.00381616
1	1:93561590	93561590	A	C	0.45	0.128637	0.0429801	3.5014	0.00381616
1	1:93568856	93568856	A	G	0.45	0.128637	0.0429801	3.5014	0.00381616
11	11:43593717	43593717	T	C	0.324	-0.132999	0.0439833	3.32703	0.00381729
38	38:15461051	15461051	G	A	0.466	0.119394	0.0398964	3.49135	0.00381904
30	30:17600968	17600968	G	A	0.356	0.133686	0.0447454	3.54636	0.00384123
23	23:49720507	49720507	T	C	0.341	-0.117276	0.0386134	5.47807	0.00384565
23	23:49721810	49721810	G	T	0.341	-0.117276	0.0386134	5.47807	0.00384565
21	21:3506535	3506535	G	A	0.203	-0.145736	0.0493741	4.0961	0.00386041
29	29:38208315	38208315	G	T	0.153	0.159502	0.0536751	3.64893	0.00387333
29	29:38210538	38210538	G	A	0.153	0.159502	0.0536751	3.64893	0.00387333
4	4:52178223	52178223	G	A	0.404	-0.129169	0.0431359	3.44976	0.00389334
36	36:27203633	27203633	G	A	0.213	-0.141858	0.04774	3.62398	0.00389523
1	1:94393835	94393835	C	A	0.343	0.132168	0.0441492	3.45026	0.00389751
1	1:94398528	94398528	G	C	0.343	0.132168	0.0441492	3.45026	0.00389751
1	1:93517820	93517820	A	T	0.45	0.127322	0.0427628	3.56276	0.00390875
21	21:5961819	5961819	G	A	0.216	-0.143188	0.0485766	4.32841	0.00392172
12	12:71251149	71251149	T	C	0.13	-0.174632	0.0585627	3.51535	0.00392924
12	12:71253493	71253493	C	T	0.13	-0.174632	0.0585627	3.51535	0.00392924
18	18:49637842	49637842	G	A	0.343	0.119998	0.0407088	3.9767	0.00393113
12	12:70638468	70638468	T	C	0.303	-0.12955	0.0438856	4.5241	0.00394655
12	12:70640836	70640836	C	A	0.303	-0.12955	0.0438856	4.5241	0.00394655
11	11:38464982	38464982	G	A	0.343	-0.132586	0.043964	3.27353	0.0039762
11	11:38493332	38493332	A	G	0.343	-0.132586	0.043964	3.27353	0.0039762
2	2:9083047	9083047	G	T	0.146	-0.175449	0.0596258	4.03394	0.00398568
11	11:36374968	36374968	C	T	0.312	0.131933	0.0447743	3.87851	0.00400089
11	11:36379807	36379807	C	A	0.312	0.131933	0.0447743	3.87851	0.00400089
11	11:36466907	36466907	G	A	0.312	0.131933	0.0447743	3.87851	0.00400089
11	11:36491764	36491764	G	T	0.312	0.131933	0.0447743	3.87851	0.00400089
11	11:36492958	36492958	C	T	0.312	0.131933	0.0447743	3.87851	0.00400089
11	11:36494015	36494015	C	T	0.312	0.131933	0.0447743	3.87851	0.00400089
11	11:36509799	36509799	G	A	0.312	0.131933	0.0447743	3.87851	0.00400089
4	4:51665788	51665788	G	C	0.452	-0.127519	0.043155	3.73315	0.00400136
4	4:51701328	51701328	T	C	0.452	-0.127519	0.043155	3.73315	0.00400136
17	17:40573294	40573294	T	C	0.448	0.123039	0.0415498	3.64538	0.00401322
4	4:53365487	53365487	G	A	0.389	-0.128723	0.0429834	3.36984	0.00403039
4	4:53378020	53378020	T	C	0.389	-0.128723	0.0429834	3.36984	0.00403039
1	1:95175792	95175792	G	A	0.471	0.130646	0.0440497	3.5872	0.00403649
39	39:41624753	41624753	C	A	0.209	0.114378	0.0389569	4.11297	0.00404073
17	17:26661830	26661830	G	A	0.193	0.158718	0.054072	4.11055	0.00405266
22	22:4229067	4229067	A	C	0.324	0.1362	0.0452922	3.25241	0.00407015
39	39:65792470	65792470	A	T	0.322	-0.105973	0.0360068	3.80764	0.00407675
30	30:16798937	16798937	G	C	0.326	0.139181	0.0465406	3.36516	0.00410719
39	39:69620866	69620866	G	T	0.377	0.0977343	0.0332253	3.78113	0.00411466
39	39:69716885	69716885	T	C	0.377	0.0977343	0.0332253	3.78113	0.00411466
39	39:70120804	70120804	A	T	0.377	0.0977343	0.0332253	3.78113	0.00411466
39	39:70194244	70194244	T	C	0.377	0.0977343	0.0332253	3.78113	0.00411466
39	39:70277585	70277585	T	G	0.377	0.0977343	0.0332253	3.78113	0.00411466
39	39:70296297	70296297	G	T	0.377	0.0977343	0.0332253	3.78113	0.00411466
39	39:70322728	70322728	A	G	0.377	0.0977343	0.0332253	3.78113	0.00411466
39	39:70523483	70523483	G	A	0.377	0.0977343	0.0332253	3.78113	0.00411466
39	39:70530594	70530594	C	T	0.377	0.0977343	0.0332253	3.78113	0.00411466
39	39:70587689	70587689	G	A	0.377	0.0977343	0.0332253	3.78113	0.00411466
20	20:49089807	49089807	C	T	0.057	-0.24281	0.0816699	5.03447	0.0041149
20	20:49379454	49379454	T	G	0.057	-0.24281	0.0816699	5.03447	0.0041149
20	20:49384471	49384471	A	G	0.057	-0.24281	0.0816699	5.03447	0.0041149
7	7:5696333	5696333	C	T	0.098	-0.187251	0.0632871	4.87134	0.00412277
22	22:60435670	60435670	T	G	0.239	0.135854	0.0450055	3.1698	0.00412811
7	7:80715018	80715018	A	G	0.406	-0.122161	0.0410867	3.47354	0.00412915
39	39:42420258	42420258	C	G	0.209	0.1143	0.0390429	4.11085	0.00414364
21	21:5163941	5163941	A	G	0.243	-0.136378	0.046593	4.17764	0.00414746
1	1:93580346	93580346	A	C	0.45	0.127648	0.042979	3.45667	0.00415832
39	39:73672737	73672737	C	T	0.157	0.123255	0.0421613	4.21225	0.00419249
1	1:92075451	92075451	G	A	0.251	0.151759	0.0518248	3.9192	0.00420473
1	1:92092945	92092945	A	G	0.251	0.151759	0.0518248	3.9192	0.00420473
1	1:92115077	92115077	G	A	0.251	0.151759	0.0518248	3.9192	0.00420473
1	1:92129478	92129478	C	G	0.251	0.151759	0.0518248	3.9192	0.00420473
1	1:92143430	92143430	A	G	0.251	0.151759	0.0518248	3.9192	0.00420473
1	1:92253889	92253889	T	C	0.251	0.151759	0.0518248	3.9192	0.00420473
1	1:92322449	92322449	A	G	0.251	0.151759	0.0518248	3.9192	0.00420473
1	1:92324060	92324060	A	G	0.251	0.151759	0.0518248	3.9192	0.00420473
1	1:92327100	92327100	A	C	0.251	0.151759	0.0518248	3.9192	0.00420473
1	1:92359977	92359977	G	A	0.251	0.151759	0.0518248	3.9192	0.00420473
1	1:92367486	92367486	A	G	0.251	0.151759	0.0518248	3.9192	0.00420473
21	21:6206174	6206174	G	T	0.211	-0.1432	0.0490042	4.19108	0.004208
21	21:6212252	6212252	T	C	0.211	-0.1432	0.0490042	4.19108	0.004208
21	21:6215912	6215912	G	A	0.211	-0.1432	0.0490042	4.19108	0.004208
21	21:6252100	6252100	C	A	0.211	-0.1432	0.0490042	4.19108	0.004208
21	21:6289857	6289857	T	C	0.211	-0.1432	0.0490042	4.19108	0.004208
21	21:6519027	6519027	G	A	0.211	-0.1432	0.0490042	4.19108	0.004208
29	29:38903826	38903826	G	A	0.284	0.131936	0.044391	3.40173	0.00420959
16	16:46109386	46109386	G	A	0.17	-0.166071	0.0566904	3.85973	0.00421139
1	1:94453832	94453832	A	G	0.343	0.131303	0.0441731	3.41023	0.00422525
30	30:20272593	20272593	G	C	0.328	0.141583	0.04749	3.36009	0.00422625
11	11:24710933	24710933	T	C	0.391	-0.126908	0.0427304	3.42582	0.00422927
25	25:25271093	25271093	G	C	0.239	0.1435	0.0486558	3.56732	0.00424607
22	22:60432256	60432256	A	G	0.253	0.135621	0.0445404	3.01085	0.00425396
30	30:20793018	20793018	T	C	0.42	0.132528	0.0441503	3.22712	0.00425452
1	1:95005782	95005782	A	G	0.435	0.129496	0.0439609	3.59472	0.00426819
20	20:48965976	48965976	A	G	0.293	-0.131225	0.0448563	3.79762	0.00429269
11	11:36568752	36568752	C	G	0.464	0.126496	0.0434043	4.48625	0.00438469
11	11:36593861	36593861	G	A	0.464	0.126496	0.0434043	4.48625	0.00438469
11	11:36660061	36660061	G	A	0.464	0.126496	0.0434043	4.48625	0.00438469
11	11:36849362	36849362	C	T	0.464	0.126496	0.0434043	4.48625	0.00438469
4	4:67246343	67246343	C	T	0.161	0.163002	0.0554155	3.54676	0.00439429
4	4:67262979	67262979	C	T	0.161	0.163002	0.0554155	3.54676	0.00439429
4	4:67274435	67274435	A	G	0.161	0.163002	0.0554155	3.54676	0.00439429
22	22:55792599	55792599	G	C	0.284	0.126215	0.043013	3.59507	0.00439568
4	4:35681345	35681345	T	C	0.381	0.130878	0.0449643	4.4066	0.00439633
23	23:47683137	47683137	T	C	0.082	0.215771	0.0728445	3.36309	0.00439673
23	23:47683423	47683423	G	A	0.082	0.215771	0.0728445	3.36309	0.00439673
23	23:48323135	48323135	C	T	0.082	0.215771	0.0728445	3.36309	0.00439673
1	1:93151289	93151289	A	G	0.41	0.127985	0.0434093	3.47197	0.00440986
1	1:93166693	93166693	G	A	0.41	0.127985	0.0434093	3.47197	0.00440986
1	1:93168992	93168992	T	C	0.41	0.127985	0.0434093	3.47197	0.00440986
11	11:23616888	23616888	G	T	0.213	0.143305	0.0479008	3.21368	0.00441426
11	11:23934510	23934510	A	G	0.213	0.143305	0.0479008	3.21368	0.00441426
36	36:26923390	26923390	G	C	0.228	-0.13693	0.0467911	3.65533	0.0044249
11	11:38231394	38231394	T	C	0.418	-0.125487	0.0431614	3.99493	0.00442925
12	12:70290714	70290714	C	T	0.088	-0.200105	0.068324	4.7982	0.00442988
12	12:70312283	70312283	T	C	0.088	-0.200105	0.068324	4.7982	0.00442988
23	23:35688536	35688536	A	C	0.331	0.123816	0.0423608	3.68346	0.00443314
30	30:17583910	17583910	A	T	0.328	0.140691	0.0474669	3.37169	0.00443392
30	30:17612059	17612059	C	T	0.328	0.140691	0.0474669	3.37169	0.00443392
30	30:17620993	17620993	T	C	0.328	0.140691	0.0474669	3.37169	0.00443392
39	39:41647470	41647470	T	C	0.477	0.0952396	0.0326697	3.79342	0.00443681
7	7:63620764	63620764	C	T	0.498	0.124673	0.0428257	3.88175	0.00444321
4	4:29526383	29526383	A	G	0.157	0.171945	0.0591153	4.46093	0.00444715
4	4:29546651	29546651	C	G	0.157	0.171945	0.0591153	4.46093	0.00444715
4	4:29550198	29550198	A	C	0.157	0.171945	0.0591153	4.46093	0.00444715
4	4:29561049	29561049	T	C	0.157	0.171945	0.0591153	4.46093	0.00444715
4	4:29564146	29564146	A	G	0.157	0.171945	0.0591153	4.46093	0.00444715
30	30:17007557	17007557	T	C	0.395	0.132652	0.0442777	3.18492	0.00444764
9	9:29038576	29038576	T	C	0.155	0.164922	0.0553749	5.3921	0.00446379
9	9:29070528	29070528	G	A	0.155	0.164922	0.0553749	5.3921	0.00446379
37	37:24253364	24253364	T	C	0.504	0.120146	0.0409	4.98382	0.00449699
26	26:8154664	8154664	T	C	0.117	-0.188891	0.0649733	4.52851	0.00450153
21	21:6588409	6588409	T	A	0.211	-0.141594	0.0488483	4.14332	0.00450984
21	21:4744302	4744302	C	A	0.174	-0.144532	0.0498227	4.37271	0.0045144
17	17:24854053	24854053	C	T	0.224	0.149479	0.0515987	4.15052	0.00453311
11	11:35607354	35607354	G	T	0.352	0.123624	0.0409649	3.06414	0.00453399
11	11:35660104	35660104	C	T	0.352	0.123624	0.0409649	3.06414	0.00453399
11	11:35663358	35663358	A	G	0.352	0.123624	0.0409649	3.06414	0.00453399
11	11:35672650	35672650	G	A	0.352	0.123624	0.0409649	3.06414	0.00453399
5	5:71482683	71482683	T	C	0.331	0.120028	0.0413452	4.49047	0.00453767
1	1:121695339	121695339	T	C	0.462	0.116403	0.0382306	2.92763	0.00454089
11	11:37551530	37551530	A	G	0.291	0.130984	0.0448203	3.60958	0.0045641
21	21:5147402	5147402	T	C	0.241	-0.135257	0.0467523	4.21994	0.00458428
21	21:5161435	5161435	A	G	0.241	-0.135257	0.0467523	4.21994	0.00458428
21	21:5162634	5162634	A	G	0.241	-0.135257	0.0467523	4.21994	0.00458428
21	21:5167467	5167467	T	C	0.241	-0.135257	0.0467523	4.21994	0.00458428
21	21:5274153	5274153	G	A	0.241	-0.135257	0.0467523	4.21994	0.00458428
21	21:5298314	5298314	C	G	0.241	-0.135257	0.0467523	4.21994	0.00458428
11	11:25268273	25268273	T	C	0.28	-0.135465	0.0456256	3.26652	0.00460441
11	11:27663887	27663887	T	C	0.268	-0.136417	0.046368	3.42918	0.00460803
39	39:59940880	59940880	C	A	0.331	-0.103105	0.0354793	3.73177	0.00461643
36	36:21797492	21797492	C	A	0.379	-0.120236	0.041262	3.64354	0.00462309
36	36:21804169	21804169	C	T	0.379	-0.120236	0.041262	3.64354	0.00462309
26	26:9022214	9022214	G	A	0.406	0.121822	0.0421239	4.00337	0.00462842
26	26:9024082	9024082	G	A	0.406	0.121822	0.0421239	4.00337	0.00462842
37	37:22015441	22015441	A	G	0.308	0.127335	0.0437482	3.66361	0.00462923
37	37:24701823	24701823	C	T	0.393	-0.128436	0.0438633	3.49735	0.004634
7	7:63612716	63612716	A	C	0.494	0.123423	0.0426561	3.9613	0.00463481
7	7:63618612	63618612	C	T	0.494	0.123423	0.0426561	3.9613	0.00463481
11	11:39677121	39677121	C	T	0.395	-0.132893	0.0431306	2.84162	0.00463761
11	11:39689534	39689534	G	A	0.395	-0.132893	0.0431306	2.84162	0.00463761
30	30:17833576	17833576	A	G	0.42	0.12802	0.0431149	3.24752	0.00463936
29	29:37303240	37303240	T	C	0.236	0.137351	0.0475319	4.0018	0.00465657
30	30:9160905	9160905	T	C	0.241	0.14804	0.0494797	3.12871	0.00466064
26	26:7665411	7665411	C	A	0.425	-0.113793	0.0394107	4.23028	0.00466342
38	38:2436097	2436097	G	A	0.395	-0.115618	0.0400095	3.96241	0.00466675
30	30:20770059	20770059	A	G	0.421	0.130683	0.0440824	3.25747	0.00467012
17	17:26993682	26993682	T	G	0.195	0.156311	0.0540773	3.9229	0.00468239
17	17:26993872	26993872	A	G	0.195	0.156311	0.0540773	3.9229	0.00468239
11	11:38964018	38964018	G	T	0.397	-0.13167	0.0432257	2.93725	0.00468722
11	11:39157645	39157645	T	C	0.397	-0.13167	0.0432257	2.93725	0.00468722
9	9:15377965	15377965	T	C	0.186	-0.157732	0.0544391	4.61358	0.00469118
9	9:15466831	15466831	C	G	0.186	-0.157732	0.0544391	4.61358	0.00469118
9	9:15612888	15612888	T	G	0.186	-0.157732	0.0544391	4.61358	0.00469118
9	9:15741633	15741633	T	G	0.186	-0.157732	0.0544391	4.61358	0.00469118
9	9:15912047	15912047	T	C	0.186	-0.157732	0.0544391	4.61358	0.00469118
9	9:15983521	15983521	A	C	0.186	-0.157732	0.0544391	4.61358	0.00469118
9	9:15985494	15985494	G	A	0.186	-0.157732	0.0544391	4.61358	0.00469118
37	37:23368725	23368725	T	C	0.153	0.164578	0.0569009	4.5119	0.00469503
30	30:17827702	17827702	G	T	0.423	0.128004	0.0430102	3.19191	0.00469641
30	30:17851177	17851177	C	A	0.423	0.128004	0.0430102	3.19191	0.00469641
39	39:32958944	32958944	A	G	0.128	-0.145026	0.0497643	3.57046	0.00470029
39	39:33122471	33122471	T	C	0.128	-0.145026	0.0497643	3.57046	0.00470029
39	39:33191409	33191409	C	T	0.128	-0.145026	0.0497643	3.57046	0.00470029
39	39:33193795	33193795	G	A	0.128	-0.145026	0.0497643	3.57046	0.00470029
1	1:16959233	16959233	A	G	0.082	0.225527	0.0773161	4.92369	0.00471066
17	17:26987774	26987774	T	C	0.197	0.154457	0.0535007	3.95819	0.00471175
11	11:36472027	36472027	G	A	0.314	0.129234	0.0447053	3.86394	0.00472511
20	20:22808072	22808072	A	C	0.305	-0.127534	0.044287	4.09518	0.00477442
20	20:22818662	22818662	T	C	0.305	-0.127534	0.044287	4.09518	0.00477442
22	22:5197401	5197401	T	C	0.389	0.130939	0.0430718	2.89324	0.0047938
22	22:5460638	5460638	A	G	0.389	0.130939	0.0430718	2.89324	0.0047938
27	27:35546023	35546023	T	C	0.291	0.136964	0.046528	3.3228	0.00479397
27	27:35610829	35610829	T	C	0.291	0.136964	0.046528	3.3228	0.00479397
27	27:35616496	35616496	G	T	0.291	0.136964	0.046528	3.3228	0.00479397
27	27:35629113	35629113	T	C	0.291	0.136964	0.046528	3.3228	0.00479397
31	31:10254541	10254541	A	G	0.372	0.118204	0.0405499	3.50269	0.00480298
36	36:21775204	21775204	C	A	0.389	-0.120234	0.0415332	3.70469	0.00480991
36	36:21787120	21787120	A	T	0.389	-0.120234	0.0415332	3.70469	0.00480991
36	36:21788335	21788335	A	G	0.389	-0.120234	0.0415332	3.70469	0.00480991
36	36:21791159	21791159	T	C	0.389	-0.120234	0.0415332	3.70469	0.00480991
9	9:59540377	59540377	T	A	0.458	-0.117295	0.0407649	4.05994	0.00481063
22	22:61135569	61135569	T	C	0.14	-0.164301	0.0565869	3.60239	0.00483435
22	22:61140475	61140475	A	G	0.14	-0.164301	0.0565869	3.60239	0.00483435
35	35:13163699	13163699	G	A	0.479	-0.116378	0.040081	3.58077	0.00484104
19	19:52525725	52525725	T	C	0.082	-0.208488	0.0723458	4.55733	0.00487467
19	19:52532365	52532365	T	C	0.082	-0.208488	0.0723458	4.55733	0.00487467
14	14:58734159	58734159	A	G	0.454	-0.117169	0.0408044	4.14044	0.00487774
39	39:67657596	67657596	G	T	0.536	-0.0950533	0.0326735	3.5044	0.00488568
39	39:68741433	68741433	T	C	0.536	-0.0950533	0.0326735	3.5044	0.00488568
39	39:68834520	68834520	A	C	0.536	-0.0950533	0.0326735	3.5044	0.00488568
9	9:7086324	7086324	A	G	0.169	-0.152353	0.0529682	4.44994	0.00488603
20	20:44184319	44184319	C	T	0.284	-0.132366	0.0460828	4.32883	0.00489183
16	16:39488431	39488431	A	G	0.316	0.131411	0.0457607	4.06718	0.00489238
1	1:94828951	94828951	G	A	0.439	0.126315	0.043431	3.51491	0.00489476
36	36:27220095	27220095	C	T	0.19	-0.143524	0.049608	3.6295	0.00489568
26	26:10379624	10379624	C	T	0.452	-0.119365	0.0415968	4.20055	0.00491022
26	26:10379765	10379765	C	T	0.452	-0.119365	0.0415968	4.20055	0.00491022
11	11:32400621	32400621	G	A	0.423	0.128615	0.0448436	4.21262	0.00493288
25	25:47165115	47165115	T	C	0.128	0.168001	0.0580196	3.5813	0.00494008
22	22:60358487	60358487	A	G	0.195	0.144768	0.0492042	3.24959	0.00494017
22	22:60360804	60360804	T	C	0.195	0.144768	0.0492042	3.24959	0.00494017
22	22:60366350	60366350	T	C	0.195	0.144768	0.0492042	3.24959	0.00494017
1	1:92413389	92413389	G	A	0.251	0.147345	0.0512806	3.91162	0.0049413
37	37:24505725	24505725	T	G	0.22	0.136197	0.0475272	4.16009	0.00496426
18	18:9767673	9767673	A	G	0.142	-0.161688	0.0561368	4.69369	0.00499449
18	18:9779562	9779562	A	C	0.142	-0.161688	0.0561368	4.69369	0.00499449
18	18:9804333	9804333	T	C	0.142	-0.161688	0.0561368	4.69369	0.00499449
26	26:9554877	9554877	T	G	0.485	0.113603	0.0396081	3.92559	0.00499484
19	19:52483700	52483700	C	T	0.305	-0.12628	0.0441045	4.18896	0.00499666
39	39:33272739	33272739	G	A	0.125	-0.146948	0.0509232	3.64691	0.00499872
1	1:94820358	94820358	A	C	0.343	0.128363	0.0438393	3.33918	0.00499977
1	1:94823636	94823636	T	C	0.343	0.128363	0.0438393	3.33918	0.00499977
1	1:94823780	94823780	T	C	0.343	0.128363	0.0438393	3.33918	0.00499977
1	1:94825795	94825795	A	G	0.343	0.128363	0.0438393	3.33918	0.00499977
1	1:94825993	94825993	G	A	0.343	0.128363	0.0438393	3.33918	0.00499977
1	1:94828545	94828545	A	G	0.343	0.128363	0.0438393	3.33918	0.00499977
4	4:30710885	30710885	G	A	0.174	0.162358	0.0566827	4.00279	0.00501387
37	37:23845404	23845404	G	C	0.36	0.118768	0.0411373	4.80402	0.0050188
22	22:60544141	60544141	G	A	0.33	0.113208	0.0392966	3.66523	0.00504446
36	36:26955529	26955529	C	T	0.211	-0.138363	0.048163	3.75621	0.00505205
36	36:26960879	26960879	G	A	0.211	-0.138363	0.048163	3.75621	0.00505205
39	39:70608689	70608689	G	C	0.375	0.0956173	0.0333339	3.81478	0.00506725
2	2:40768457	40768457	C	G	0.063	-0.235949	0.0823614	4.50533	0.00508385
30	30:17067528	17067528	C	T	0.41	0.126134	0.0437248	3.61894	0.00510527
30	30:17077552	17077552	G	T	0.41	0.126134	0.0437248	3.61894	0.00510527
16	16:58428692	58428692	A	C	0.393	-0.113315	0.0396288	3.95499	0.00511105
4	4:22712191	22712191	A	T	0.052	0.254385	0.0880898	4.92585	0.00512552
4	4:22745782	22745782	T	C	0.052	0.254385	0.0880898	4.92585	0.00512552
4	4:22756449	22756449	A	C	0.052	0.254385	0.0880898	4.92585	0.00512552
4	4:22767230	22767230	T	C	0.052	0.254385	0.0880898	4.92585	0.00512552
4	4:23832430	23832430	G	A	0.052	0.254385	0.0880898	4.92585	0.00512552
4	4:23942734	23942734	T	C	0.052	0.254385	0.0880898	4.92585	0.00512552
4	4:24149924	24149924	G	C	0.052	0.254385	0.0880898	4.92585	0.00512552
4	4:24160790	24160790	A	C	0.052	0.254385	0.0880898	4.92585	0.00512552
4	4:24331416	24331416	G	A	0.052	0.254385	0.0880898	4.92585	0.00512552
4	4:24371119	24371119	T	C	0.052	0.254385	0.0880898	4.92585	0.00512552
4	4:25376488	25376488	G	C	0.052	0.254385	0.0880898	4.92585	0.00512552
17	17:26648965	26648965	G	A	0.192	0.155639	0.0544318	3.91856	0.00513172
19	19:35683217	35683217	A	G	0.307	0.121598	0.0425444	3.94279	0.00513533
19	19:35709051	35709051	C	T	0.305	0.121557	0.042555	3.93605	0.00516419
21	21:3471461	3471461	A	T	0.117	-0.169721	0.0593154	3.81001	0.00517205
21	21:3480997	3480997	C	A	0.117	-0.169721	0.0593154	3.81001	0.00517205
21	21:3503872	3503872	G	T	0.117	-0.169721	0.0593154	3.81001	0.00517205
17	17:40958010	40958010	C	T	0.479	0.119269	0.0416087	3.74755	0.00517258
39	39:31646437	31646437	T	C	0.262	-0.104194	0.0365653	4.20473	0.00520056
29	29:38901519	38901519	A	T	0.282	0.128037	0.0443904	3.52197	0.00520776
21	21:7739922	7739922	G	A	0.364	-0.123914	0.0432969	3.775	0.00521697
37	37:22018166	22018166	G	A	0.157	-0.162058	0.0568903	4.33314	0.00524229
37	37:23719189	23719189	G	A	0.351	0.118448	0.0414438	4.58446	0.0052438
1	1:95195460	95195460	T	G	0.375	0.125676	0.0433283	3.40942	0.005255
1	1:95254278	95254278	A	G	0.375	0.125676	0.0433283	3.40942	0.005255
25	25:38873617	38873617	C	T	0.113	0.176301	0.0609133	3.43453	0.00525989
9	9:15504295	15504295	G	T	0.211	-0.144409	0.0506524	4.45749	0.00526148
9	9:15510031	15510031	A	C	0.211	-0.144409	0.0506524	4.45749	0.00526148
9	9:15517747	15517747	C	A	0.211	-0.144409	0.0506524	4.45749	0.00526148
14	14:32303613	32303613	G	A	0.193	-0.145731	0.0511975	4.34187	0.00527784
14	14:32315580	32315580	A	G	0.193	-0.145731	0.0511975	4.34187	0.00527784
14	14:32370639	32370639	C	T	0.193	-0.145731	0.0511975	4.34187	0.00527784
14	14:32383232	32383232	C	T	0.193	-0.145731	0.0511975	4.34187	0.00527784
14	14:32385916	32385916	T	G	0.193	-0.145731	0.0511975	4.34187	0.00527784
39	39:32711251	32711251	A	G	0.121	-0.148101	0.0518217	3.74303	0.00529335
39	39:32872414	32872414	C	T	0.121	-0.148101	0.0518217	3.74303	0.00529335
39	39:32873212	32873212	C	T	0.121	-0.148101	0.0518217	3.74303	0.00529335
39	39:33013587	33013587	T	G	0.121	-0.148101	0.0518217	3.74303	0.00529335
36	36:26919337	26919337	G	A	0.18	-0.145263	0.0507485	3.66893	0.00530797
36	36:26986751	26986751	C	T	0.18	-0.145263	0.0507485	3.66893	0.00530797
36	36:27006335	27006335	C	T	0.18	-0.145263	0.0507485	3.66893	0.00530797
1	1:92114960	92114960	G	A	0.257	0.146617	0.0515755	4.15816	0.00531013
31	31:7522364	7522364	G	T	0.362	0.124204	0.0424532	3.23838	0.00531069
7	7:4817113	4817113	A	G	0.098	-0.179902	0.0628292	4.75409	0.0053232
26	26:10158423	10158423	G	A	0.444	-0.117585	0.0413927	4.11903	0.00534314
30	30:17625435	17625435	G	C	0.328	0.135471	0.0467947	3.40807	0.00534454
9	9:15095642	15095642	A	G	0.216	-0.141788	0.0497675	4.54531	0.00534849
9	9:15139567	15139567	A	G	0.216	-0.141788	0.0497675	4.54531	0.00534849
1	1:94782945	94782945	A	T	0.379	0.123558	0.0426614	3.39552	0.00534997
36	36:27917289	27917289	C	T	0.232	-0.138547	0.0479761	3.42139	0.00536091
37	37:22762221	22762221	C	T	0.333	-0.123573	0.0432885	3.72295	0.00536899
37	37:22763280	22763280	C	T	0.333	-0.123573	0.0432885	3.72295	0.00536899
36	36:22348001	22348001	C	T	0.443	-0.112636	0.0392048	3.54473	0.00537102
23	23:35301147	35301147	T	C	0.46	0.115343	0.0405783	3.94114	0.0053742
37	37:24058482	24058482	G	A	0.469	-0.116668	0.0411365	4.20312	0.00540679
4	4:32936936	32936936	C	G	0.23	0.142807	0.0502127	3.84321	0.00541545
2	2:9130793	9130793	C	T	0.157	-0.164799	0.0580673	4.00629	0.00542137
2	2:9131031	9131031	T	C	0.157	-0.164799	0.0580673	4.00629	0.00542137
2	2:9212669	9212669	T	C	0.157	-0.164799	0.0580673	4.00629	0.00542137
22	22:11108570	11108570	T	A	0.328	0.132695	0.046278	3.54552	0.00542201
26	26:8462635	8462635	G	A	0.387	0.118928	0.0419404	4.08554	0.00542639
16	16:36718758	36718758	T	C	0.188	0.151772	0.0533911	3.86552	0.00542793
27	27:40779049	40779049	A	G	0.471	-0.120052	0.0422279	3.84771	0.00543315
4	4:29243871	29243871	C	A	0.14	0.173284	0.0609848	4.51445	0.00544304
11	11:25620034	25620034	A	G	0.121	-0.184558	0.0643813	3.54929	0.00544375
23	23:49948588	49948588	T	C	0.134	0.160805	0.0564759	3.74472	0.00544637
38	38:15489020	15489020	G	A	0.37	-0.115963	0.0409256	4.13035	0.00544938
16	16:58276517	58276517	G	A	0.385	-0.113833	0.0401504	4.02417	0.00545124
1	1:96857893	96857893	A	G	0.36	0.123867	0.04348	3.76073	0.00545185
18	18:6855694	6855694	A	G	0.22	-0.135938	0.0479828	4.23002	0.00545857
37	37:23743215	23743215	A	G	0.352	0.118231	0.0415472	4.61351	0.00545966
37	37:23773070	23773070	T	C	0.352	0.118231	0.0415472	4.61351	0.00545966
2	2:7862190	7862190	T	G	0.159	-0.163691	0.0576508	3.9012	0.00547572
11	11:27180656	27180656	A	G	0.268	-0.129799	0.0450329	3.43865	0.00547654
11	11:27253292	27253292	A	G	0.268	-0.129799	0.0450329	3.43865	0.00547654
11	11:27255358	27255358	T	G	0.268	-0.129799	0.0450329	3.43865	0.00547654
26	26:9565300	9565300	G	A	0.487	0.111842	0.0394598	3.96387	0.00548793
9	9:14699812	14699812	T	C	0.192	-0.153515	0.0539257	4.67613	0.00549267
9	9:14704372	14704372	A	G	0.192	-0.153515	0.0539257	4.67613	0.00549267
9	9:14724913	14724913	A	G	0.192	-0.153515	0.0539257	4.67613	0.00549267
23	23:48808880	48808880	C	T	0.071	0.230442	0.0793175	3.25426	0.00549554
12	12:70039835	70039835	C	A	0.144	-0.154984	0.0544818	3.7489	0.00550585
17	17:40862319	40862319	A	T	0.458	0.119027	0.0416559	3.60555	0.00551129
17	17:40882347	40882347	G	A	0.458	0.119027	0.0416559	3.60555	0.00551129
17	17:40899445	40899445	G	A	0.458	0.119027	0.0416559	3.60555	0.00551129
17	17:40905660	40905660	G	A	0.458	0.119027	0.0416559	3.60555	0.00551129
17	17:40947223	40947223	T	C	0.458	0.119027	0.0416559	3.60555	0.00551129
17	17:40959434	40959434	C	A	0.458	0.119027	0.0416559	3.60555	0.00551129
17	17:40993780	40993780	A	T	0.458	0.119027	0.0416559	3.60555	0.00551129
39	39:70479982	70479982	C	T	0.343	-0.0961998	0.033958	4.43416	0.00553176
5	5:36766483	36766483	C	T	0.452	0.124655	0.0440144	3.95514	0.00553365
9	9:6867478	6867478	T	C	0.17	-0.148901	0.0523437	4.67734	0.00553392
3	3:83777633	83777633	G	A	0.351	-0.123831	0.0436051	3.77614	0.00555354
3	3:83818623	83818623	C	T	0.351	-0.123831	0.0436051	3.77614	0.00555354
18	18:9768146	9768146	G	A	0.169	-0.150185	0.0530756	4.38258	0.00555622
18	18:9770565	9770565	A	G	0.169	-0.150185	0.0530756	4.38258	0.00555622
18	18:9800428	9800428	A	T	0.169	-0.150185	0.0530756	4.38258	0.00555622
27	27:35486777	35486777	A	G	0.272	0.137108	0.0473034	3.29021	0.00555744
27	27:35494857	35494857	T	C	0.272	0.137108	0.0473034	3.29021	0.00555744
39	39:46299187	46299187	A	G	0.307	-0.100568	0.035584	4.13362	0.00556282
39	39:49364362	49364362	C	T	0.307	-0.100568	0.035584	4.13362	0.00556282
39	39:49463169	49463169	G	A	0.307	-0.100568	0.035584	4.13362	0.00556282
39	39:49975339	49975339	A	G	0.307	-0.100568	0.035584	4.13362	0.00556282
27	27:32914455	32914455	A	G	0.301	0.135053	0.0471454	3.53111	0.00556321
21	21:4947248	4947248	A	G	0.119	-0.164314	0.0579456	3.81493	0.00556498
27	27:40962263	40962263	C	G	0.469	-0.119253	0.0420997	3.8787	0.00557248
37	37:24146471	24146471	T	G	0.454	0.112877	0.0399508	4.17855	0.00557482
2	2:65462173	65462173	T	C	0.063	0.217192	0.0768012	3.97993	0.00557501
36	36:26961822	26961822	G	A	0.247	-0.131381	0.0460649	3.59291	0.00558988
36	36:26968612	26968612	C	T	0.247	-0.131381	0.0460649	3.59291	0.00558988
36	36:26968883	26968883	G	A	0.247	-0.131381	0.0460649	3.59291	0.00558988
36	36:26993393	26993393	G	A	0.247	-0.131381	0.0460649	3.59291	0.00558988
37	37:25758377	25758377	T	C	0.318	-0.119099	0.0420987	3.90861	0.00559775
37	37:25759921	25759921	C	T	0.318	-0.119099	0.0420987	3.90861	0.00559775
16	16:42936982	42936982	G	A	0.308	0.128043	0.0453387	4.08641	0.00560628
16	16:42942369	42942369	C	T	0.308	0.128043	0.0453387	4.08641	0.00560628
16	16:42943028	42943028	T	C	0.308	0.128043	0.0453387	4.08641	0.00560628
11	11:35302739	35302739	C	T	0.339	0.121197	0.0412015	3.08318	0.0056126
30	30:9173477	9173477	T	C	0.241	0.145486	0.0494603	3.07728	0.00561734
30	30:9199930	9199930	C	T	0.241	0.145486	0.0494603	3.07728	0.00561734
29	29:39472751	39472751	G	A	0.27	0.124017	0.0436208	3.66315	0.00562604
36	36:21755831	21755831	A	G	0.443	-0.117236	0.0409596	3.50974	0.00562703
17	17:41787122	41787122	T	C	0.538	0.117559	0.0411239	3.52582	0.00563427
23	23:48069855	48069855	T	C	0.088	0.204763	0.0714511	3.44372	0.00563897
11	11:43679160	43679160	T	G	0.333	-0.124734	0.0432417	3.37204	0.00564197
11	11:43705610	43705610	G	A	0.333	-0.124734	0.0432417	3.37204	0.00564197
11	11:43742727	43742727	A	G	0.333	-0.124734	0.0432417	3.37204	0.00564197
39	39:70458940	70458940	C	T	0.341	-0.0963512	0.034077	4.47705	0.00564551
4	4:53242463	53242463	A	C	0.381	-0.126116	0.0435685	3.2877	0.00564922
31	31:7511918	7511918	T	C	0.364	0.123144	0.0424769	3.26671	0.00565314
31	31:7517213	7517213	G	A	0.364	0.123144	0.0424769	3.26671	0.00565314
7	7:63824639	63824639	C	A	0.494	0.12179	0.0430617	3.8741	0.00566204
7	7:63828790	63828790	A	G	0.494	0.12179	0.0430617	3.8741	0.00566204
7	7:63846290	63846290	C	A	0.494	0.12179	0.0430617	3.8741	0.00566204
1	1:94648590	94648590	C	T	0.343	0.12837	0.0444197	3.30963	0.00567362
1	1:94660981	94660981	A	G	0.343	0.12837	0.0444197	3.30963	0.00567362
1	1:94667504	94667504	C	A	0.343	0.12837	0.0444197	3.30963	0.00567362
4	4:86176508	86176508	A	G	0.213	0.134501	0.0475179	3.80569	0.00567525
31	31:1175163	1175163	T	C	0.354	-0.122678	0.0429774	3.53349	0.00568486
21	21:7718244	7718244	T	G	0.362	-0.122104	0.0431728	3.80762	0.00571527
4	4:67309111	67309111	A	G	0.157	0.163351	0.0570789	3.46516	0.005716
12	12:45867122	45867122	A	G	0.425	0.12347	0.0430729	5.11112	0.00572393
30	30:18478717	18478717	G	A	0.408	0.125804	0.0441392	3.57017	0.00573375
20	20:46982388	46982388	C	G	0.37	-0.123599	0.0438586	3.99728	0.00573411
21	21:6605323	6605323	A	G	0.209	-0.137819	0.0489604	4.13852	0.00574875
21	21:6615356	6615356	G	A	0.209	-0.137819	0.0489604	4.13852	0.00574875
39	39:69157671	69157671	T	C	0.339	-0.0995265	0.0352808	3.87032	0.00576556
20	20:24774902	24774902	T	G	0.121	0.168648	0.0597537	3.78892	0.00580146
20	20:48602465	48602465	A	G	0.377	-0.119035	0.042122	3.74013	0.00581627
9	9:6911251	6911251	C	T	0.169	-0.148589	0.0525102	4.71714	0.00582133
17	17:43751487	43751487	A	G	0.264	-0.14237	0.0494178	3.30164	0.00582442
11	11:21775569	21775569	T	C	0.293	0.128953	0.044858	3.34181	0.00583465
37	37:23086840	23086840	A	G	0.148	0.160103	0.0569479	4.33446	0.00583587
10	10:65528932	65528932	T	C	0.205	-0.133028	0.0471599	4.59598	0.0058456
10	10:65529082	65529082	T	C	0.205	-0.133028	0.0471599	4.59598	0.0058456
31	31:10311441	10311441	A	T	0.481	0.111403	0.0396494	4.04117	0.00585311
17	17:29136734	29136734	G	C	0.149	-0.157383	0.0560316	4.2447	0.00585426
21	21:19017180	19017180	T	G	0.393	0.124397	0.044058	3.73949	0.00586841
39	39:69469230	69469230	G	A	0.343	-0.0958328	0.0340966	4.39746	0.00587753
26	26:9955992	9955992	A	C	0.441	-0.117602	0.0418909	4.21737	0.00587797
26	26:9968553	9968553	T	C	0.441	-0.117602	0.0418909	4.21737	0.00587797
37	37:21078779	21078779	A	G	0.41	-0.11823	0.0420952	3.95222	0.00591065
37	37:21081006	21081006	G	A	0.41	-0.11823	0.0420952	3.95222	0.00591065
14	14:32873310	32873310	G	A	0.391	-0.116501	0.0413473	3.7871	0.00591728
14	14:32874432	32874432	A	T	0.391	-0.116501	0.0413473	3.7871	0.00591728
14	14:32884821	32884821	A	C	0.391	-0.116501	0.0413473	3.7871	0.00591728
29	29:39275164	39275164	A	C	0.425	0.117415	0.0408054	3.26866	0.00593417
29	29:39297831	39297831	T	C	0.425	0.117415	0.0408054	3.26866	0.00593417
37	37:23350375	23350375	A	G	0.161	0.158	0.0563217	4.34836	0.00594417
1	1:94907525	94907525	T	C	0.435	0.125369	0.0441117	3.51072	0.00595074
1	1:94932024	94932024	G	A	0.435	0.125369	0.0441117	3.51072	0.00595074
22	22:60948768	60948768	T	G	0.261	-0.124333	0.0439803	3.63074	0.00597363
37	37:23369586	23369586	C	T	0.282	0.127711	0.0454182	4.57283	0.00597572
38	38:23283344	23283344	A	G	0.466	0.111286	0.0386122	5.40426	0.00598599
1	1:95045443	95045443	T	C	0.339	0.12803	0.0446249	3.32604	0.00598845
1	1:95047682	95047682	G	A	0.339	0.12803	0.0446249	3.32604	0.00598845
4	4:25618723	25618723	G	C	0.063	0.226478	0.0808543	4.32025	0.00600574
17	17:27248452	27248452	G	T	0.193	0.150878	0.0538722	4.0387	0.00601034
30	30:28324265	28324265	G	C	0.255	-0.135308	0.0476742	4.98484	0.00601546
28	28:15308037	15308037	A	T	0.04	0.269172	0.0949964	3.53341	0.00604665
11	11:59858616	59858616	T	C	0.065	-0.221973	0.0791923	4.47242	0.00605129
11	11:59879864	59879864	A	G	0.065	-0.221973	0.0791923	4.47242	0.00605129
29	29:39613123	39613123	A	G	0.228	0.126914	0.0449148	3.57278	0.00605228
29	29:39684511	39684511	G	A	0.228	0.126914	0.0449148	3.57278	0.00605228
22	22:11010048	11010048	A	G	0.33	0.130704	0.0462706	3.57915	0.00606999
22	22:11027230	11027230	A	G	0.33	0.130704	0.0462706	3.57915	0.00606999
22	22:11027364	11027364	G	A	0.33	0.130704	0.0462706	3.57915	0.00606999
22	22:11032352	11032352	T	A	0.33	0.130704	0.0462706	3.57915	0.00606999
22	22:11050117	11050117	A	C	0.33	0.130704	0.0462706	3.57915	0.00606999
22	22:11058865	11058865	T	C	0.33	0.130704	0.0462706	3.57915	0.00606999
22	22:11083433	11083433	G	A	0.33	0.130704	0.0462706	3.57915	0.00606999
1	1:121900921	121900921	A	G	0.119	0.176624	0.0602182	2.96635	0.00607588
10	10:27142750	27142750	G	C	0.161	-0.163237	0.0575068	3.46219	0.00608774
39	39:56500437	56500437	A	G	0.31	-0.098681	0.0353002	4.03925	0.00609593
39	39:56644290	56644290	G	A	0.31	-0.098681	0.0353002	4.03925	0.00609593
39	39:56757886	56757886	C	T	0.31	-0.098681	0.0353002	4.03925	0.00609593
39	39:56835616	56835616	T	G	0.31	-0.098681	0.0353002	4.03925	0.00609593
39	39:58207085	58207085	G	A	0.31	-0.098681	0.0353002	4.03925	0.00609593
39	39:58840426	58840426	T	C	0.31	-0.098681	0.0353002	4.03925	0.00609593
39	39:60193749	60193749	C	T	0.31	-0.098681	0.0353002	4.03925	0.00609593
11	11:24719372	24719372	C	A	0.412	-0.119909	0.041683	3.25015	0.00610067
11	11:38646033	38646033	T	C	0.343	-0.125609	0.0435455	3.20643	0.00611675
11	11:38769229	38769229	T	C	0.343	-0.125609	0.0435455	3.20643	0.00611675
39	39:42402449	42402449	A	G	0.216	0.108437	0.0388389	4.09959	0.00614047
4	4:53238217	53238217	G	T	0.387	-0.122932	0.0429996	3.33045	0.00614276
8	8:54139158	54139158	G	A	0.121	-0.169235	0.0593192	3.34728	0.00614505
39	39:67960526	67960526	T	A	0.335	-0.0989336	0.0352499	3.74232	0.0061486
39	39:68019562	68019562	A	G	0.335	-0.0989336	0.0352499	3.74232	0.0061486
22	22:60843405	60843405	T	A	0.356	-0.117681	0.0411269	3.31609	0.00616851
9	9:7000109	7000109	G	A	0.19	-0.141066	0.0504629	4.45898	0.0061759
11	11:38415258	38415258	T	C	0.423	-0.121907	0.041055	2.87916	0.00617997
20	20:49065565	49065565	C	G	0.077	-0.200381	0.0718424	4.33815	0.00622062
20	20:49068886	49068886	A	C	0.077	-0.200381	0.0718424	4.33815	0.00622062
28	28:11212061	11212061	G	A	0.142	0.16095	0.0576482	3.91593	0.00622503
28	28:11214289	11214289	T	C	0.142	0.16095	0.0576482	3.91593	0.00622503
28	28:11217871	11217871	C	T	0.142	0.16095	0.0576482	3.91593	0.00622503
11	11:35523235	35523235	C	T	0.377	0.117099	0.0411935	3.39727	0.00623384
4	4:31763679	31763679	C	A	0.186	0.15262	0.0546561	3.89112	0.00623713
4	4:31765712	31765712	C	T	0.186	0.15262	0.0546561	3.89112	0.00623713
4	4:31777624	31777624	T	C	0.186	0.15262	0.0546561	3.89112	0.00623713
20	20:45794369	45794369	C	T	0.312	-0.126532	0.0453438	3.94568	0.00624008
11	11:38663027	38663027	C	T	0.352	0.122882	0.0437635	3.67428	0.00624236
11	11:38669717	38669717	T	C	0.352	0.122882	0.0437635	3.67428	0.00624236
17	17:41001223	41001223	G	A	0.477	0.117512	0.0417746	3.61162	0.00625059
20	20:22784926	22784926	C	T	0.305	-0.123412	0.0442684	4.00668	0.00625518
37	37:23700687	23700687	T	C	0.349	0.116713	0.0416785	4.64562	0.00625556
36	36:27762458	27762458	T	C	0.18	-0.148667	0.0525185	3.45781	0.00625782
36	36:27763137	27763137	A	G	0.18	-0.148667	0.0525185	3.45781	0.00625782
26	26:8591071	8591071	T	C	0.393	0.116769	0.0419012	4.02755	0.00626142
26	26:8591937	8591937	A	G	0.393	0.116769	0.0419012	4.02755	0.00626142
26	26:8619772	8619772	A	G	0.393	0.116769	0.0419012	4.02755	0.00626142
9	9:8355405	8355405	C	T	0.079	0.208942	0.0749763	4.3777	0.00628116
12	12:70982251	70982251	T	C	0.211	-0.132079	0.0473348	3.87246	0.00628449
38	38:2064908	2064908	A	G	0.37	-0.118488	0.042366	3.74522	0.00630479
9	9:29304563	29304563	G	A	0.157	0.147387	0.0524518	4.84805	0.00632147
20	20:49618427	49618427	C	A	0.224	-0.147033	0.0524629	3.64841	0.00633654
26	26:8415954	8415954	G	A	0.326	-0.116486	0.0418436	4.39499	0.00634207
19	19:40583162	40583162	T	G	0.142	-0.173456	0.0623903	4.14097	0.0063487
19	19:40585858	40585858	C	T	0.142	-0.173456	0.0623903	4.14097	0.0063487
14	14:56661190	56661190	G	A	0.201	-0.13256	0.0476612	4.37903	0.00638159
14	14:56663918	56663918	C	T	0.201	-0.13256	0.0476612	4.37903	0.00638159
26	26:9616766	9616766	C	T	0.439	-0.116144	0.0417981	4.25304	0.00638409
26	26:9650543	9650543	A	G	0.439	-0.116144	0.0417981	4.25304	0.00638409
26	26:9701564	9701564	G	A	0.439	-0.116144	0.0417981	4.25304	0.00638409
17	17:27853632	27853632	C	T	0.197	0.150583	0.0541144	3.93342	0.00638433
12	12:70759331	70759331	C	A	0.069	-0.213432	0.0768519	4.19799	0.00640041
31	31:8064026	8064026	G	A	0.36	0.122071	0.043119	3.40334	0.00642313
31	31:8071062	8071062	A	T	0.36	0.122071	0.043119	3.40334	0.00642313
2	2:45461462	45461462	A	G	0.435	-0.121904	0.0438992	4.03391	0.00644263
2	2:45481653	45481653	G	A	0.435	-0.121904	0.0438992	4.03391	0.00644263
2	2:45491436	45491436	C	A	0.435	-0.121904	0.0438992	4.03391	0.00644263
2	2:45549200	45549200	A	G	0.435	-0.121904	0.0438992	4.03391	0.00644263
2	2:45767305	45767305	C	T	0.435	-0.121904	0.0438992	4.03391	0.00644263
4	4:24247496	24247496	T	C	0.13	0.171759	0.0604551	5.28064	0.00645352
22	22:1703710	1703710	G	A	0.538	-0.122825	0.0419281	2.93092	0.00645571
22	22:3669061	3669061	G	T	0.538	-0.122825	0.0419281	2.93092	0.00645571
22	22:3704641	3704641	C	T	0.538	-0.122825	0.0419281	2.93092	0.00645571
22	22:3792421	3792421	A	G	0.538	-0.122825	0.0419281	2.93092	0.00645571
22	22:3837333	3837333	A	G	0.538	-0.122825	0.0419281	2.93092	0.00645571
22	22:4002242	4002242	C	T	0.538	-0.122825	0.0419281	2.93092	0.00645571
22	22:4014013	4014013	G	A	0.538	-0.122825	0.0419281	2.93092	0.00645571
22	22:4023495	4023495	C	T	0.538	-0.122825	0.0419281	2.93092	0.00645571
22	22:4024883	4024883	G	C	0.538	-0.122825	0.0419281	2.93092	0.00645571
22	22:4031377	4031377	G	A	0.538	-0.122825	0.0419281	2.93092	0.00645571
22	22:4064660	4064660	C	T	0.538	-0.122825	0.0419281	2.93092	0.00645571
22	22:4082006	4082006	T	C	0.538	-0.122825	0.0419281	2.93092	0.00645571
22	22:4206356	4206356	C	A	0.538	-0.122825	0.0419281	2.93092	0.00645571
22	22:4233935	4233935	G	A	0.538	-0.122825	0.0419281	2.93092	0.00645571
26	26:10778750	10778750	A	G	0.354	0.116861	0.0419209	3.76875	0.00645623
5	5:36693466	36693466	T	C	0.46	0.123418	0.0444735	4.07935	0.00645867
5	5:36742373	36742373	T	C	0.46	0.123418	0.0444735	4.07935	0.00645867
5	5:36743974	36743974	A	G	0.46	0.123418	0.0444735	4.07935	0.00645867
11	11:38309432	38309432	A	G	0.536	0.12144	0.0435707	3.772	0.00647284
16	16:42775979	42775979	C	A	0.301	0.126731	0.0456989	4.14649	0.00647691
14	14:35777342	35777342	G	A	0.464	0.111432	0.0401038	4.47161	0.00648857
30	30:17407856	17407856	G	A	0.444	0.120323	0.0431859	3.75973	0.00649794
39	39:69609839	69609839	G	A	0.339	-0.0952226	0.0342979	4.42663	0.00650033
4	4:15461347	15461347	T	C	0.307	0.12906	0.0465359	4.33822	0.00650711
[truncated: 8,533 more rows]
